# Supplementary material for: Comprehensive functional annotation of ESR1-driven enhancers in breast cancer reveals hierarchical activity independent of genomic and epigenomic contexts
Source: HighWire-hosted journal article supplement (doi:10.1101/gr.280320.124), 2025-06-10
Supplement: Supplemental_Table_S1.xlsx [file Supplemental_Table_S1.xlsx]

## Sheet: Supplemental Table S1
Supplemental Table 1 | Processed STARR-seq data.
chr_hg19	start_hg19	end_hg19	chr_hg38	start_hg38	end_hg38	STARR_ID	baseMean	log2FoldChange	lfcSE	stat	pvalue	padj	active_veh	active_e2	const,active_veh	const,active_e2	diff,activity	log10adjpval
chr1	1071798	1072341	chr1	1136418	1136961	STARR_ID10	3525.56	-0.0614779	0.0700854	-0.877186	0.380386	0.703965	TRUE	TRUE	FALSE	FALSE	constitutive	0.152449
chr1	177417871	177418371	chr1	177448735	177449235	STARR_ID1000	13331.7	2.57454	0.249739	10.3089	6.42221e-25	3.6154e-23	TRUE	TRUE	TRUE	TRUE	induced	22.4418
chr1	177445773	177446273	chr1	177476637	177477137	STARR_ID1001	1654.17	0.0678284	0.14887	0.455621	0.648663	0.85326	FALSE	FALSE	FALSE	FALSE	inactive	0.0689185
chr1	177540807	177541307	chr1	177571672	177572172	STARR_ID1002	227.095	1.10206	0.149015	7.39564	1.40733e-13	3.29351e-12	FALSE	TRUE	FALSE	FALSE	induced	11.4823
chr1	177554672	177555172	chr1	177585537	177586037	STARR_ID1003	1765.39	-0.0775144	0.157922	-0.490841	0.623539	0.841126	TRUE	TRUE	TRUE	TRUE	constitutive	0.0751392
chr1	177558257	177558757	chr1	177589122	177589622	STARR_ID1004	875.716	-0.192113	0.12938	-1.48487	0.137577	0.443453	FALSE	FALSE	FALSE	FALSE	inactive	0.353153
chr1	177882191	177882691	chr1	177913056	177913556	STARR_ID1006	344.129	-0.19577	0.146449	-1.33678	0.181295	0.5088	FALSE	FALSE	FALSE	FALSE	inactive	0.293453
chr1	178499217	178499552	chr1	178530082	178530417	STARR_ID1007	4428.2	-0.234102	0.352674	-0.663791	0.506824	0.783373	TRUE	TRUE	TRUE	TRUE	constitutive	0.106031
chr1	178521459	178521959	chr1	178552324	178552824	STARR_ID1008	769.254	0.0245632	0.0752765	0.326306	0.744193	0.895876	FALSE	FALSE	FALSE	FALSE	inactive	0.0477523
chr1	178624818	178625318	chr1	178655683	178656183	STARR_ID1009	1581	0.210934	0.143852	1.46633	0.142559	0.451585	TRUE	TRUE	TRUE	TRUE	constitutive	0.34526
chr1	178694812	178695547	chr1	178725677	178726412	STARR_ID1010	3323.76	0.473855	0.263655	1.79725	0.0722956	0.311089	TRUE	TRUE	FALSE	FALSE	constitutive	0.507115
chr1	178974607	178975125	chr1	179005472	179005990	STARR_ID1011	756.525	0.13655	0.10717	1.27415	0.20261	0.535566	FALSE	FALSE	FALSE	FALSE	inactive	0.271187
chr1	178986097	178986597	chr1	179016962	179017462	STARR_ID1012	243.561	-0.0397452	0.124499	-0.31924	0.749544	0.899005	FALSE	FALSE	FALSE	FALSE	inactive	0.0462378
chr1	180126432	180127275	chr1	180157297	180158140	STARR_ID1015	841.568	-0.201258	0.0775638	-2.59474	0.00946628	0.0690956	TRUE	TRUE	FALSE	FALSE	constitutive	1.16055
chr1	180136968	180138580	chr1	180167833	180169445	STARR_ID1016	6154.76	0.17726	0.138113	1.28344	0.199336	0.530563	TRUE	TRUE	FALSE	FALSE	constitutive	0.275263
chr1	180139588	180140088	chr1	180170453	180170953	STARR_ID1017	529.678	-0.161622	0.106549	-1.51688	0.129298	0.431498	FALSE	FALSE	FALSE	FALSE	inactive	0.365021
chr1	180197650	180198150	chr1	180228515	180229015	STARR_ID1019	620.792	0.965488	0.125136	7.71552	1.20493e-14	3.08769e-13	TRUE	TRUE	FALSE	TRUE	constitutive	12.5104
chr1	9903397	9903897	chr1	9843339	9843839	STARR_ID102	2112.37	-0.0496904	0.115149	-0.431532	0.666082	0.862565	TRUE	FALSE	FALSE	FALSE	constitutive	0.0642084
chr1	180213774	180214274	chr1	180244639	180245139	STARR_ID1020	1944.5	-0.0829362	0.14637	-0.566619	0.570973	0.815494	FALSE	FALSE	FALSE	FALSE	inactive	0.0885791
chr1	180554336	180556479	chr1	180585200	180587343	STARR_ID1024	1731.79	-0.0861222	0.0685392	-1.25654	0.20892	0.54248	TRUE	TRUE	FALSE	FALSE	constitutive	0.265616
chr1	181081545	181082045	chr1	181112409	181112909	STARR_ID1028	931.221	-0.123652	0.155982	-0.79273	0.427935	0.734346	TRUE	TRUE	TRUE	TRUE	constitutive	0.134099
chr1	181086718	181087218	chr1	181117582	181118082	STARR_ID1029	653.509	-0.23156	0.106597	-2.1723	0.0298331	0.172079	TRUE	TRUE	FALSE	FALSE	constitutive	0.764273
chr1	9922989	9923275	chr1	9862931	9863217	STARR_ID103	312.276	0.932001	0.131878	7.06713	1.5817e-12	3.4795e-11	TRUE	TRUE	FALSE	TRUE	constitutive	10.4585
chr1	181088304	181088804	chr1	181119168	181119668	STARR_ID1030	655.486	-0.128535	0.100076	-1.28437	0.199013	0.530259	TRUE	TRUE	FALSE	FALSE	constitutive	0.275512
chr1	181096084	181096584	chr1	181126948	181127448	STARR_ID1031	1469.99	1.23086	0.12194	10.0939	5.87795e-24	3.07871e-22	TRUE	TRUE	TRUE	TRUE	induced	21.5116
chr1	182070380	182071095	chr1	182101245	182101960	STARR_ID1034	5957.27	-0.28107	0.129502	-2.1704	0.0299766	0.172697	TRUE	TRUE	TRUE	FALSE	constitutive	0.762714
chr1	182098175	182098638	chr1	182129040	182129503	STARR_ID1036	264.649	0.077164	0.112787	0.684156	0.493876	0.774466	TRUE	TRUE	FALSE	FALSE	constitutive	0.110997
chr1	182110065	182110565	chr1	182140930	182141430	STARR_ID1037	436.757	-0.154193	0.11325	-1.36153	0.173346	0.495934	FALSE	FALSE	FALSE	FALSE	inactive	0.304576
chr1	182115402	182115902	chr1	182146267	182146767	STARR_ID1039	2144.67	-0.201888	0.0837631	-2.41023	0.0159424	0.10593	TRUE	TRUE	TRUE	TRUE	constitutive	0.974982
chr1	10010422	10010922	chr1	9950364	9950864	STARR_ID104	1071.26	0.653379	0.112633	5.80097	6.59331e-09	1.09625e-07	FALSE	TRUE	FALSE	FALSE	constitutive	6.96009
chr1	182150441	182150941	chr1	182181306	182181806	STARR_ID1040	270.552	-0.0810555	0.107251	-0.755753	0.449797	0.746651	FALSE	FALSE	FALSE	FALSE	inactive	0.126883
chr1	182187001	182187501	chr1	182217866	182218366	STARR_ID1042	310.049	0.211847	0.123282	1.71839	0.0857257	0.344771	TRUE	TRUE	FALSE	FALSE	constitutive	0.462469
chr1	182213494	182213994	chr1	182244359	182244859	STARR_ID1044	836.521	0.3182	0.0954434	3.33391	0.00085634	0.00818503	TRUE	TRUE	FALSE	FALSE	constitutive	2.08698
chr1	182284325	182284825	chr1	182315190	182315690	STARR_ID1045	262.444	0.204131	0.117822	1.73253	0.0831784	0.337967	FALSE	TRUE	FALSE	FALSE	constitutive	0.471126
chr1	182299524	182300024	chr1	182330389	182330889	STARR_ID1047	269.423	0.0962119	0.104601	0.919795	0.35768	0.684942	FALSE	FALSE	FALSE	FALSE	inactive	0.164346
chr1	182332782	182333282	chr1	182363647	182364147	STARR_ID1048	236.961	-0.109081	0.121069	-0.900983	0.367598	0.693763	FALSE	FALSE	FALSE	FALSE	inactive	0.158789
chr1	10078607	10079107	chr1	10018549	10019049	STARR_ID105	29.6166	-0.472677	0.317181	-1.49024	0.136161	0.440885	FALSE	FALSE	FALSE	FALSE	inactive	0.355675
chr1	182602720	182603220	chr1	182633585	182634085	STARR_ID1051	475.336	0.0230222	0.11389	0.202144	0.839804	0.937421	FALSE	FALSE	FALSE	FALSE	inactive	0.0280655
chr1	182615801	182616301	chr1	182646666	182647166	STARR_ID1052	330.18	-0.0543196	0.129015	-0.421033	0.673731	0.864957	FALSE	FALSE	FALSE	FALSE	inactive	0.0630057
chr1	183020742	183021242	chr1	183051607	183052107	STARR_ID1054	196.047	-0.370586	0.151207	-2.45086	0.0142516	0.0963973	FALSE	FALSE	FALSE	FALSE	inactive	1.01594
chr1	183129003	183129503	chr1	183159868	183160368	STARR_ID1055	1146.69	-0.370847	0.142934	-2.59452	0.0094722	0.0691036	TRUE	TRUE	TRUE	TRUE	constitutive	1.1605
chr1	183218535	183218954	chr1	183249400	183249819	STARR_ID1057	535.04	2.02229	0.194014	10.4234	1.93855e-25	1.14072e-23	TRUE	TRUE	FALSE	TRUE	induced	22.9428
chr1	183250546	183251322	chr1	183281411	183282187	STARR_ID1058	1963.38	0.102132	0.168031	0.607817	0.543309	0.802983	FALSE	FALSE	FALSE	FALSE	inactive	0.0952936
chr1	184332067	184332578	chr1	184362933	184363444	STARR_ID1063	779.445	-0.0251285	0.105469	-0.238256	0.811683	0.925103	TRUE	TRUE	FALSE	FALSE	constitutive	0.0338101
chr1	184342242	184342742	chr1	184373108	184373608	STARR_ID1064	754.067	0.271413	0.098797	2.74718	0.00601101	0.0467381	FALSE	FALSE	FALSE	FALSE	inactive	1.33033
chr1	184452091	184452591	chr1	184482957	184483457	STARR_ID1065	337.027	0.0390367	0.140302	0.278232	0.780834	0.912334	FALSE	TRUE	FALSE	FALSE	constitutive	0.039846
chr1	184559061	184559953	chr1	184589927	184590819	STARR_ID1066	296.345	-0.287062	0.153354	-1.87189	0.0612223	0.283093	FALSE	FALSE	FALSE	FALSE	inactive	0.54807
chr1	184591193	184591968	chr1	184622059	184622834	STARR_ID1067	832.995	-0.11396	0.0850682	-1.33963	0.180364	0.507184	FALSE	FALSE	FALSE	FALSE	inactive	0.294835
chr1	184595719	184596257	chr1	184626585	184627123	STARR_ID1068	2037.13	1.13868	0.134205	8.48464	2.16378e-17	7.03181e-16	TRUE	TRUE	TRUE	TRUE	induced	15.1529
chr1	184598741	184599241	chr1	184629607	184630107	STARR_ID1069	461.117	0.0207865	0.10182	0.204149	0.838237	0.936611	FALSE	FALSE	FALSE	FALSE	inactive	0.0284408
chr1	10138474	10138909	chr1	10078416	10078851	STARR_ID107	341.921	-0.062937	0.117484	-0.535708	0.59216	0.82534	FALSE	FALSE	FALSE	FALSE	inactive	0.0833672
chr1	184601843	184602343	chr1	184632709	184633209	STARR_ID1070	997.924	-0.130857	0.085157	-1.53666	0.124377	0.422941	TRUE	TRUE	FALSE	FALSE	constitutive	0.37372
chr1	184604459	184604959	chr1	184635325	184635825	STARR_ID1071	1141	-0.0968399	0.0977888	-0.990296	0.32203	0.65656	TRUE	FALSE	FALSE	FALSE	constitutive	0.182726
chr1	184770541	184771041	chr1	184801407	184801907	STARR_ID1072	301.186	-0.194122	0.10296	-1.88541	0.0593745	0.278086	FALSE	FALSE	FALSE	FALSE	inactive	0.555821
chr1	184772216	184772716	chr1	184803082	184803582	STARR_ID1073	663.887	0.0206657	0.0845719	0.244357	0.806955	0.923092	TRUE	TRUE	FALSE	FALSE	constitutive	0.0347552
chr1	184807734	184808234	chr1	184838600	184839100	STARR_ID1074	223.642	0.00598586	0.12615	0.0474503	0.962154	0.987323	FALSE	FALSE	FALSE	FALSE	inactive	0.00554072
chr1	184874279	184875430	chr1	184905146	184906297	STARR_ID1076	782.389	-0.161508	0.0976203	-1.65445	0.0980368	0.371739	FALSE	FALSE	FALSE	FALSE	inactive	0.429762
chr1	184898997	184899497	chr1	184929865	184930365	STARR_ID1077	218.174	-0.285678	0.159276	-1.7936	0.0728769	0.312153	TRUE	TRUE	FALSE	FALSE	constitutive	0.505632
chr1	185614390	185615553	chr1	185645258	185646421	STARR_ID1083	276.82	0.445799	0.128929	3.45772	0.000544769	0.00542078	FALSE	TRUE	FALSE	FALSE	constitutive	2.26594
chr1	186200941	186201441	chr1	186231809	186232309	STARR_ID1084	218.457	0.579682	0.145233	3.99139	6.56881e-05	0.000749022	FALSE	TRUE	FALSE	FALSE	constitutive	3.12551
chr1	189282528	189283028	chr1	189313398	189313898	STARR_ID1088	118.522	0.313217	0.150533	2.08071	0.0374601	0.202664	FALSE	FALSE	FALSE	FALSE	inactive	0.693223
chr1	189650594	189651093	chr1	189681464	189681963	STARR_ID1090	133.068	-0.26428	0.177314	-1.49046	0.136102	0.440885	FALSE	FALSE	FALSE	FALSE	inactive	0.355675
chr1	191678234	191678734	chr1	191709104	191709604	STARR_ID1093	110.627	0.0521181	0.212137	0.245682	0.805928	0.922482	FALSE	FALSE	FALSE	FALSE	inactive	0.0350419
chr1	192454852	192455352	chr1	192485722	192486222	STARR_ID1094	48.5148	0.0129407	0.267896	0.0483049	0.961473	0.987226	FALSE	FALSE	FALSE	FALSE	inactive	0.00558351
chr1	1079659	1081074	chr1	1144279	1145694	STARR_ID11	17065.3	1.18008	0.225757	5.22724	1.7206e-07	2.539e-06	FALSE	TRUE	FALSE	TRUE	induced	5.59534
chr1	197191386	197191886	chr1	197222256	197222756	STARR_ID1100	1707.38	-0.00827973	0.156725	-0.0528298	0.957868	0.985647	TRUE	TRUE	FALSE	FALSE	constitutive	0.00627869
chr1	197632475	197632879	chr1	197663345	197663749	STARR_ID1102	92.2501	-0.502363	0.19749	-2.54373	0.0109675	0.0782554	FALSE	FALSE	FALSE	FALSE	inactive	1.10649
chr1	199870470	199870841	chr1	199901342	199901713	STARR_ID1106	455.719	0.490664	0.159323	3.07969	0.0020722	0.0182428	TRUE	TRUE	FALSE	FALSE	constitutive	1.73891
chr1	199964259	199964583	chr1	199995131	199995455	STARR_ID1107	44.6809	0.152769	0.268642	0.568669	0.569581	0.81514	FALSE	FALSE	FALSE	FALSE	inactive	0.0887677
chr1	199985929	199986429	chr1	200016801	200017301	STARR_ID1108	252.368	1.22288	0.135436	9.02919	1.72953e-19	6.54248e-18	FALSE	TRUE	FALSE	FALSE	induced	17.1843
chr1	200087792	200088292	chr1	200118664	200119164	STARR_ID1109	243.94	-0.0486058	0.177501	-0.273834	0.784212	0.914339	FALSE	FALSE	FALSE	FALSE	inactive	0.0388929
chr1	10576535	10577035	chr1	10516478	10516978	STARR_ID111	562.211	-0.119565	0.090942	-1.31474	0.188596	0.518311	TRUE	TRUE	FALSE	FALSE	constitutive	0.28541
chr1	200119812	200120367	chr1	200150684	200151239	STARR_ID1110	312.912	0.145526	0.143945	1.01098	0.312025	0.647553	TRUE	TRUE	FALSE	FALSE	constitutive	0.188725
chr1	200153251	200153751	chr1	200184123	200184623	STARR_ID1111	134.516	0.0549565	0.193255	0.284373	0.776124	0.910327	FALSE	FALSE	FALSE	FALSE	inactive	0.0408024
chr1	200168286	200168786	chr1	200199158	200199658	STARR_ID1112	205.749	-0.127914	0.136832	-0.93483	0.349876	0.679369	FALSE	FALSE	FALSE	FALSE	inactive	0.167894
chr1	200341093	200341593	chr1	200371965	200372465	STARR_ID1114	400.709	-0.328494	0.0964281	-3.40662	0.000657722	0.00645046	TRUE	TRUE	TRUE	TRUE	constitutive	2.19041
chr1	200446867	200447367	chr1	200477739	200478239	STARR_ID1115	1196.84	-0.281464	0.104757	-2.68681	0.00721373	0.0547791	TRUE	TRUE	FALSE	FALSE	constitutive	1.26139
chr1	201139829	201140329	chr1	201170701	201171201	STARR_ID1118	3160.08	-0.188586	0.215965	-0.873225	0.38254	0.705442	TRUE	TRUE	FALSE	FALSE	constitutive	0.151539
chr1	201278549	201279049	chr1	201309421	201309921	STARR_ID1120	985.743	-0.0792434	0.0975091	-0.812676	0.416404	0.728021	FALSE	FALSE	FALSE	FALSE	inactive	0.137856
chr1	201566925	201568954	chr1	201597797	201599826	STARR_ID1126	3762.57	-0.0628188	0.0710228	-0.884488	0.376433	0.701109	FALSE	FALSE	FALSE	FALSE	inactive	0.154214
chr1	201574025	201574525	chr1	201604897	201605397	STARR_ID1127	1054.26	0.13214	0.127012	1.04037	0.298166	0.635392	TRUE	TRUE	FALSE	FALSE	constitutive	0.196958
chr1	201683675	201684402	chr1	201714547	201715274	STARR_ID1129	850.328	0.0896946	0.147117	0.609681	0.542073	0.801811	TRUE	TRUE	TRUE	TRUE	constitutive	0.095928
chr1	201910622	201911122	chr1	201941494	201941994	STARR_ID1130	1460.67	-0.01929	0.108225	-0.178239	0.858535	0.946361	TRUE	TRUE	FALSE	FALSE	constitutive	0.0239433
chr1	201977193	201977693	chr1	202008065	202008565	STARR_ID1132	13738.9	-0.211686	0.147757	-1.43266	0.151955	0.464571	TRUE	TRUE	TRUE	TRUE	constitutive	0.332948
chr1	201985204	201985704	chr1	202016076	202016576	STARR_ID1133	580.247	0.719397	0.192668	3.73388	0.000188552	0.00202715	FALSE	TRUE	FALSE	FALSE	constitutive	2.69311
chr1	201986812	201988687	chr1	202017684	202019559	STARR_ID1134	7917.9	-0.135716	0.0699059	-1.94141	0.0522082	0.255048	TRUE	TRUE	FALSE	FALSE	constitutive	0.593378
chr1	201991911	201992638	chr1	202022783	202023510	STARR_ID1135	13786.5	0.33901	0.213204	1.59008	0.111818	0.398127	TRUE	TRUE	TRUE	TRUE	constitutive	0.399978
chr1	202003873	202004376	chr1	202034745	202035248	STARR_ID1136	9144.18	-0.324006	0.11438	-2.8327	0.00461561	0.0372033	TRUE	TRUE	TRUE	TRUE	constitutive	1.42942
chr1	202015375	202015875	chr1	202046247	202046747	STARR_ID1137	983.11	-0.251199	0.108678	-2.3114	0.0208108	0.1304	TRUE	FALSE	FALSE	FALSE	constitutive	0.884722
chr1	202026057	202027952	chr1	202056929	202058824	STARR_ID1138	4288.42	-0.130199	0.15452	-0.842601	0.399452	0.717533	TRUE	TRUE	FALSE	FALSE	constitutive	0.144158
chr1	202038739	202040678	chr1	202069611	202071550	STARR_ID1139	3419.57	-0.0979544	0.0637986	-1.53537	0.124693	0.423284	FALSE	FALSE	FALSE	FALSE	inactive	0.373368
chr1	202053821	202056522	chr1	202084693	202087394	STARR_ID1140	4040.88	-0.148514	0.0591263	-2.5118	0.0120115	0.0839048	FALSE	FALSE	FALSE	FALSE	inactive	1.07621
chr1	202075137	202078022	chr1	202106009	202108894	STARR_ID1141	12172.4	0.265205	0.128973	2.05629	0.0397547	0.21203	TRUE	TRUE	TRUE	TRUE	constitutive	0.673602
chr1	202081925	202082498	chr1	202112797	202113370	STARR_ID1142	1891.35	0.243678	0.0914089	2.66581	0.00768036	0.0575984	FALSE	TRUE	FALSE	FALSE	constitutive	1.23959
chr1	202101544	202102173	chr1	202132416	202133045	STARR_ID1143	7351.09	0.295106	0.110681	2.66628	0.00766957	0.0575984	TRUE	TRUE	FALSE	FALSE	constitutive	1.23959
chr1	202317363	202317776	chr1	202348235	202348648	STARR_ID1144	1069.09	0.086051	0.139365	0.617452	0.536937	0.798841	TRUE	TRUE	TRUE	TRUE	constitutive	0.0975397
chr1	202349179	202349679	chr1	202380051	202380551	STARR_ID1145	765.545	-0.0939121	0.198371	-0.473415	0.635917	0.8469	FALSE	FALSE	FALSE	FALSE	inactive	0.0721681
chr1	202501301	202501756	chr1	202532173	202532628	STARR_ID1146	606.274	1.82979	0.220447	8.30037	1.03784e-16	3.24727e-15	TRUE	TRUE	FALSE	TRUE	induced	14.4885
chr1	203058081	203058900	chr1	203088953	203089772	STARR_ID1148	5426.12	1.66618	0.137684	12.1015	1.03695e-33	1.28933e-31	TRUE	TRUE	FALSE	TRUE	induced	30.8896
chr1	203069544	203069985	chr1	203100416	203100857	STARR_ID1149	994.198	-0.0657953	0.113164	-0.581413	0.560962	0.811534	TRUE	TRUE	FALSE	FALSE	constitutive	0.0906935
chr1	203138742	203139242	chr1	203169614	203170114	STARR_ID1150	747.307	-0.195417	0.128668	-1.51878	0.128819	0.430771	TRUE	TRUE	FALSE	FALSE	constitutive	0.365754
chr1	203250111	203250611	chr1	203280983	203281483	STARR_ID1152	178.228	-0.153919	0.153691	-1.00148	0.316594	0.651927	TRUE	TRUE	FALSE	FALSE	constitutive	0.185801
chr1	203285659	203286159	chr1	203316531	203317031	STARR_ID1153	196.688	-0.0588962	0.150506	-0.391321	0.69556	0.874171	FALSE	FALSE	FALSE	FALSE	inactive	0.0584037
chr1	203297552	203298499	chr1	203328424	203329371	STARR_ID1155	1250.11	-0.129354	0.0580232	-2.22935	0.0257909	0.155057	FALSE	FALSE	FALSE	FALSE	inactive	0.80951
chr1	203488572	203489084	chr1	203519444	203519956	STARR_ID1156	3483.09	0.829837	0.143535	5.78144	7.40642e-09	1.22433e-07	TRUE	TRUE	FALSE	TRUE	constitutive	6.9121
chr1	203569200	203569612	chr1	203600072	203600484	STARR_ID1157	240.201	0.108767	0.11085	0.981209	0.32649	0.660606	TRUE	TRUE	FALSE	FALSE	constitutive	0.180057
chr1	203883371	203883835	chr1	203914243	203914707	STARR_ID1159	71.1846	-0.168741	0.19508	-0.864988	0.387046	0.707946	FALSE	FALSE	FALSE	FALSE	inactive	0.15
chr1	203901112	203901676	chr1	203931984	203932548	STARR_ID1160	409.318	-0.17884	0.113719	-1.57265	0.1158	0.40649	FALSE	FALSE	FALSE	FALSE	inactive	0.39095
chr1	203965166	203966407	chr1	203996038	203997279	STARR_ID1161	764.59	-0.135035	0.097311	-1.38767	0.165239	0.482194	FALSE	FALSE	FALSE	FALSE	inactive	0.316778
chr1	204053461	204053961	chr1	204084333	204084833	STARR_ID1163	1557.85	-0.073961	0.125613	-0.588799	0.555996	0.809464	FALSE	FALSE	FALSE	FALSE	inactive	0.0918025
chr1	204073161	204073661	chr1	204104033	204104533	STARR_ID1164	1280.24	-0.152301	0.0801268	-1.90075	0.0573345	0.271736	TRUE	FALSE	FALSE	FALSE	constitutive	0.565854
chr1	204099300	204099800	chr1	204130172	204130672	STARR_ID1165	935.823	0.135721	0.119071	1.13983	0.254357	0.591074	TRUE	TRUE	FALSE	FALSE	constitutive	0.228358
chr1	204110225	204110725	chr1	204141097	204141597	STARR_ID1167	585.079	0.0527659	0.0924199	0.570937	0.568043	0.814081	FALSE	FALSE	FALSE	FALSE	inactive	0.0893326
chr1	204114392	204114892	chr1	204145264	204145764	STARR_ID1168	649.906	0.185805	0.0948268	1.95941	0.0500642	0.24762	FALSE	FALSE	FALSE	FALSE	inactive	0.606215
chr1	204256043	204256543	chr1	204286915	204287415	STARR_ID1170	274.279	-0.186067	0.1316	-1.41389	0.157395	0.472777	TRUE	FALSE	FALSE	FALSE	constitutive	0.325343
chr1	204349575	204350075	chr1	204380447	204380947	STARR_ID1171	574.261	0.170564	0.132766	1.28469	0.1989	0.530139	TRUE	TRUE	FALSE	TRUE	constitutive	0.27561
chr1	204386393	204386893	chr1	204417265	204417765	STARR_ID1172	481.518	-0.070775	0.147572	-0.479595	0.631515	0.844244	FALSE	FALSE	FALSE	FALSE	inactive	0.0735318
chr1	204412208	204412708	chr1	204443080	204443580	STARR_ID1173	674.567	-0.0213722	0.116051	-0.184162	0.853886	0.944221	FALSE	FALSE	FALSE	FALSE	inactive	0.0249264
chr1	204448747	204449247	chr1	204479619	204480119	STARR_ID1174	1981.23	-0.0866866	0.112142	-0.773004	0.43952	0.74078	TRUE	TRUE	FALSE	FALSE	constitutive	0.130311
chr1	204542484	204542984	chr1	204573356	204573856	STARR_ID1175	985.842	-0.122434	0.128056	-0.956099	0.339022	0.670894	TRUE	TRUE	FALSE	FALSE	constitutive	0.173346
chr1	204732736	204733236	chr1	204763608	204764108	STARR_ID1177	2291.41	1.08502	0.118516	9.1551	5.43061e-20	2.11586e-18	FALSE	TRUE	FALSE	TRUE	induced	17.6745
chr1	204872577	204873077	chr1	204903449	204903949	STARR_ID1178	564.87	0.923655	0.184275	5.01237	5.37641e-07	7.53699e-06	TRUE	TRUE	FALSE	FALSE	constitutive	5.1228
chr1	204972766	204973266	chr1	205003638	205004138	STARR_ID1179	816.255	-0.000403989	0.0820055	-0.00492637	0.996069	0.999074	FALSE	FALSE	FALSE	FALSE	inactive	0.000402448
chr1	10770533	10771033	chr1	10710476	10710976	STARR_ID118	544.171	-0.0575347	0.0914493	-0.629143	0.529255	0.795056	FALSE	FALSE	FALSE	FALSE	inactive	0.0996024
chr1	205286441	205286941	chr1	205317313	205317813	STARR_ID1181	516.288	-0.153823	0.0908893	-1.69242	0.0905661	0.355673	FALSE	FALSE	FALSE	FALSE	inactive	0.448949
chr1	205533043	205533543	chr1	205563915	205564415	STARR_ID1188	731.933	-0.055308	0.0772073	-0.716358	0.473771	0.761259	FALSE	FALSE	FALSE	FALSE	inactive	0.118467
chr1	205633585	205634085	chr1	205664457	205664957	STARR_ID1190	2964.98	-0.135581	0.0857399	-1.5813	0.113808	0.402709	TRUE	TRUE	FALSE	FALSE	constitutive	0.395009
chr1	206862260	206862760	chr1	206688915	206689415	STARR_ID1194	1081.26	0.189778	0.1405	1.35073	0.176781	0.501157	TRUE	TRUE	FALSE	FALSE	constitutive	0.300026
chr1	206867873	206868335	chr1	206694528	206694990	STARR_ID1195	1403.34	0.0241655	0.162493	0.148717	0.881777	0.955192	FALSE	FALSE	FALSE	FALSE	inactive	0.0199093
chr1	206888081	206888581	chr1	206714736	206715236	STARR_ID1196	325.059	-0.155239	0.139837	-1.11014	0.266937	0.603086	TRUE	TRUE	FALSE	FALSE	constitutive	0.219621
chr1	206970298	206970662	chr1	206796953	206797317	STARR_ID1197	794.229	-0.0429574	0.106131	-0.404758	0.685655	0.871125	TRUE	TRUE	FALSE	FALSE	constitutive	0.0599198
chr1	207016999	207017499	chr1	206843654	206844154	STARR_ID1198	544.491	0.688451	0.132793	5.18439	2.16719e-07	3.14925e-06	TRUE	TRUE	FALSE	FALSE	constitutive	5.50179
chr1	207068676	207069176	chr1	206895331	206895831	STARR_ID1201	1015.04	-0.133068	0.102927	-1.29284	0.196067	0.526689	FALSE	FALSE	FALSE	FALSE	inactive	0.278446
chr1	207076862	207077379	chr1	206903517	206904034	STARR_ID1202	914.771	1.38424	0.216453	6.3951	1.60445e-10	2.93751e-09	FALSE	TRUE	FALSE	TRUE	induced	8.53202
chr1	207198775	207199350	chr1	207025430	207026005	STARR_ID1205	385.468	-0.0811564	0.114011	-0.71183	0.47657	0.763367	TRUE	TRUE	FALSE	FALSE	constitutive	0.117267
chr1	207414704	207415204	chr1	207241359	207241859	STARR_ID1207	359.649	0.266778	0.109058	2.44621	0.0144366	0.0973719	FALSE	FALSE	FALSE	FALSE	inactive	1.01157
chr1	207489773	207490273	chr1	207316428	207316928	STARR_ID1209	1237.19	-0.409495	0.378515	-1.08185	0.27932	0.617406	TRUE	TRUE	TRUE	TRUE	constitutive	0.209429
chr1	208021561	208023248	chr1	207848216	207849903	STARR_ID1213	2235.43	0.0375952	0.0981365	0.383091	0.701652	0.876552	TRUE	TRUE	FALSE	FALSE	constitutive	0.0572225
chr1	208063662	208064222	chr1	207890317	207890877	STARR_ID1214	1005.24	0.35383	0.109948	3.21815	0.00129019	0.0119176	TRUE	TRUE	FALSE	TRUE	constitutive	1.92381
chr1	10811197	10813096	chr1	10751140	10753039	STARR_ID122	2917.45	0.307643	0.0980723	3.1369	0.00170743	0.0153647	TRUE	TRUE	FALSE	FALSE	constitutive	1.81347
chr1	208376338	208377179	chr1	208202993	208203834	STARR_ID1220	1315.53	-0.198507	0.0769648	-2.5792	0.00990305	0.0715532	FALSE	FALSE	FALSE	FALSE	inactive	1.14537
chr1	208649947	208650447	chr1	208476602	208477102	STARR_ID1222	1110.51	0.169392	0.136123	1.2444	0.213351	0.546919	TRUE	TRUE	FALSE	FALSE	constitutive	0.262077
chr1	209393320	209393820	chr1	209219975	209220475	STARR_ID1224	418.686	0.527958	0.112955	4.67407	2.95289e-06	3.87371e-05	TRUE	TRUE	FALSE	FALSE	constitutive	4.41187
chr1	209699517	209700017	chr1	209526172	209526672	STARR_ID1225	816.102	-0.198707	0.088842	-2.23663	0.0253104	0.152835	FALSE	FALSE	FALSE	FALSE	inactive	0.815778
chr1	209719698	209720198	chr1	209546353	209546853	STARR_ID1226	1116.85	0.655507	0.102427	6.39977	1.55611e-10	2.85632e-09	TRUE	TRUE	FALSE	FALSE	constitutive	8.54419
chr1	210540172	210540672	chr1	210366828	210367328	STARR_ID1232	560.346	0.262686	0.0962002	2.73062	0.00632159	0.0488872	TRUE	TRUE	FALSE	FALSE	constitutive	1.3108
chr1	210650704	210651204	chr1	210477360	210477860	STARR_ID1236	285.454	-0.244385	0.112855	-2.16548	0.0303508	0.174083	TRUE	FALSE	FALSE	FALSE	constitutive	0.759244
chr1	211286875	211288294	chr1	211113533	211114952	STARR_ID1238	2914.91	1.85092	0.119136	15.5362	1.97444e-54	1.34441e-51	TRUE	TRUE	TRUE	TRUE	induced	50.8715
chr1	10851647	10852147	chr1	10791590	10792090	STARR_ID124	113.564	-0.0876495	0.165488	-0.529643	0.596359	0.827737	FALSE	FALSE	FALSE	FALSE	inactive	0.0821078
chr1	211432081	211434313	chr1	211258739	211260971	STARR_ID1240	12733	0.292972	0.106565	2.74922	0.00597369	0.0465678	TRUE	TRUE	FALSE	TRUE	constitutive	1.33191
chr1	211500991	211501491	chr1	211327649	211328149	STARR_ID1241	484.057	-0.122601	0.0946411	-1.29543	0.195171	0.526061	TRUE	TRUE	FALSE	FALSE	constitutive	0.278964
chr1	211504597	211505097	chr1	211331255	211331755	STARR_ID1242	625.318	-0.0372464	0.0969273	-0.384271	0.700778	0.876034	FALSE	FALSE	FALSE	FALSE	inactive	0.0574791
chr1	211643268	211643768	chr1	211469926	211470426	STARR_ID1244	1314.46	-0.018926	0.0908691	-0.208277	0.835012	0.935651	FALSE	FALSE	FALSE	FALSE	inactive	0.0288862
chr1	211694573	211695386	chr1	211521231	211522044	STARR_ID1249	842.447	1.08376	0.161922	6.69312	2.18458e-11	4.30859e-10	FALSE	TRUE	FALSE	FALSE	induced	9.36566
chr1	211714668	211716917	chr1	211541326	211543575	STARR_ID1251	2576.91	-0.0989614	0.0825511	-1.19879	0.23061	0.566688	FALSE	FALSE	FALSE	FALSE	inactive	0.246656
chr1	211816919	211817419	chr1	211643577	211644077	STARR_ID1252	1429.03	-0.212413	0.083384	-2.54741	0.0108527	0.0775434	FALSE	FALSE	FALSE	FALSE	inactive	1.11046
chr1	211848692	211849457	chr1	211675350	211676115	STARR_ID1253	2967.52	-0.112469	0.0734639	-1.53095	0.125783	0.425294	TRUE	TRUE	FALSE	FALSE	constitutive	0.371311
chr1	211909193	211909693	chr1	211735851	211736351	STARR_ID1254	2820.15	-0.118762	0.188141	-0.63124	0.527884	0.793963	TRUE	TRUE	TRUE	TRUE	constitutive	0.100199
chr1	212093514	212094014	chr1	211920172	211920672	STARR_ID1255	375.58	-0.0733605	0.14476	-0.506773	0.612314	0.835343	FALSE	FALSE	FALSE	FALSE	inactive	0.0781352
chr1	212101528	212102028	chr1	211928186	211928686	STARR_ID1256	300.407	0.177934	0.111324	1.59835	0.109966	0.393494	TRUE	TRUE	FALSE	FALSE	constitutive	0.405062
chr1	212251288	212251788	chr1	212077946	212078446	STARR_ID1257	228.74	1.25159	0.158766	7.88324	3.18987e-15	8.60603e-14	FALSE	TRUE	FALSE	FALSE	induced	13.0652
chr1	212311787	212312287	chr1	212138445	212138945	STARR_ID1258	755.49	0.845179	0.0900262	9.38814	6.10697e-21	2.5912e-19	FALSE	TRUE	FALSE	FALSE	constitutive	18.5865
chr1	212320773	212321273	chr1	212147431	212147931	STARR_ID1259	369	-0.0652665	0.13794	-0.47315	0.636106	0.8469	FALSE	FALSE	FALSE	FALSE	inactive	0.072168
chr1	212640174	212641557	chr1	212466832	212468215	STARR_ID1262	2107.95	0.375989	0.0891201	4.2189	2.45492e-05	0.000293113	TRUE	TRUE	FALSE	FALSE	constitutive	3.53297
chr1	212659402	212659902	chr1	212486060	212486560	STARR_ID1264	1945.45	-0.138319	0.0941272	-1.46949	0.1417	0.449996	TRUE	TRUE	FALSE	FALSE	constitutive	0.346792
chr1	212731168	212731779	chr1	212557826	212558437	STARR_ID1265	2969.72	0.835119	0.133879	6.23787	4.43569e-10	7.89862e-09	TRUE	TRUE	TRUE	TRUE	constitutive	8.10245
chr1	212894742	212895242	chr1	212721400	212721900	STARR_ID1267	533.339	-0.184257	0.0927114	-1.98742	0.0468756	0.237944	TRUE	TRUE	FALSE	FALSE	constitutive	0.623524
chr1	214158203	214158703	chr1	213984860	213985360	STARR_ID1269	685.621	-0.141587	0.114148	-1.24038	0.214836	0.548319	TRUE	FALSE	FALSE	FALSE	constitutive	0.260966
chr1	214390053	214390553	chr1	214216710	214217210	STARR_ID1270	2845.38	-0.356702	0.102524	-3.47921	0.000502891	0.00503913	TRUE	TRUE	TRUE	TRUE	constitutive	2.29764
chr1	214435024	214435524	chr1	214261681	214262181	STARR_ID1271	373.753	-0.0685041	0.124109	-0.551969	0.58097	0.820862	FALSE	FALSE	FALSE	FALSE	inactive	0.0857297
chr1	214500821	214501195	chr1	214327478	214327852	STARR_ID1272	326.263	1.55093	0.261687	5.92668	3.09129e-09	5.27474e-08	FALSE	TRUE	FALSE	TRUE	induced	7.2778
chr1	214612817	214613317	chr1	214439474	214439974	STARR_ID1273	2911.01	-0.0493469	0.134837	-0.365975	0.714383	0.882904	TRUE	TRUE	TRUE	TRUE	constitutive	0.0540867
chr1	215287668	215288168	chr1	215114325	215114825	STARR_ID1275	357.883	-0.211759	0.170154	-1.24451	0.21331	0.546919	TRUE	TRUE	TRUE	TRUE	constitutive	0.262077
chr1	215598388	215598888	chr1	215425045	215425545	STARR_ID1276	247.035	1.23889	0.169166	7.32347	2.41631e-13	5.5578e-12	FALSE	TRUE	FALSE	FALSE	induced	11.2551
chr1	215655367	215655867	chr1	215482024	215482524	STARR_ID1277	205.66	-0.237099	0.159935	-1.48247	0.138215	0.44422	FALSE	FALSE	FALSE	FALSE	inactive	0.352402
chr1	215713422	215713971	chr1	215540079	215540628	STARR_ID1279	276.229	-0.14406	0.131812	-1.09292	0.274428	0.612506	FALSE	FALSE	FALSE	FALSE	inactive	0.212889
chr1	215756638	215757138	chr1	215583295	215583795	STARR_ID1280	874.102	0.213773	0.153041	1.39683	0.162464	0.478765	TRUE	TRUE	TRUE	TRUE	constitutive	0.319877
chr1	217005541	217006041	chr1	216832199	216832699	STARR_ID1281	361.21	-0.0873719	0.095371	-0.916127	0.3596	0.686043	FALSE	FALSE	FALSE	FALSE	inactive	0.163648
chr1	217251567	217252067	chr1	217078225	217078725	STARR_ID1284	347.283	-0.068923	0.120003	-0.574345	0.565734	0.81298	FALSE	FALSE	FALSE	FALSE	inactive	0.0899201
chr1	217308136	217308636	chr1	217134794	217135294	STARR_ID1285	455.346	-0.114869	0.0952108	-1.20647	0.227635	0.563433	TRUE	FALSE	FALSE	FALSE	constitutive	0.249158
chr1	218633294	218633695	chr1	218459952	218460353	STARR_ID1287	1927.93	-0.0437582	0.145526	-0.30069	0.763651	0.904577	TRUE	TRUE	FALSE	FALSE	constitutive	0.0435547
chr1	218671299	218671799	chr1	218497957	218498457	STARR_ID1289	232.34	0.0688518	0.180914	0.380577	0.703517	0.877993	FALSE	FALSE	FALSE	FALSE	inactive	0.0565087
chr1	218790055	218790464	chr1	218616713	218617122	STARR_ID1290	90.3545	0.0670016	0.223712	0.2995	0.764559	0.904972	TRUE	TRUE	FALSE	FALSE	constitutive	0.0433647
chr1	220508947	220509447	chr1	220335605	220336105	STARR_ID1294	367.609	-0.26476	0.104336	-2.53756	0.0111628	0.0792391	TRUE	FALSE	FALSE	FALSE	constitutive	1.10106
chr1	220510804	220511304	chr1	220337462	220337962	STARR_ID1295	250.585	-0.12485	0.144664	-0.863031	0.388121	0.708688	FALSE	FALSE	FALSE	FALSE	inactive	0.149545
chr1	222060386	222060886	chr1	221887044	221887544	STARR_ID1299	1263.01	-0.022504	0.14066	-0.159988	0.872891	0.952202	TRUE	TRUE	TRUE	TRUE	constitutive	0.021271
chr1	223322386	223322770	chr1	223149044	223149428	STARR_ID1302	188.704	0.370086	0.158314	2.33768	0.0194041	0.123202	FALSE	FALSE	FALSE	FALSE	inactive	0.909384
chr1	223492713	223493232	chr1	223319371	223319890	STARR_ID1303	275.79	-0.104182	0.11989	-0.868985	0.384856	0.706571	FALSE	FALSE	FALSE	FALSE	inactive	0.150844
chr1	223617823	223618323	chr1	223444481	223444981	STARR_ID1304	1261.29	1.0084	0.166999	6.03836	1.55688e-09	2.6984e-08	TRUE	TRUE	TRUE	TRUE	induced	7.56889
chr1	223842816	223843316	chr1	223655114	223655614	STARR_ID1306	1283.65	0.0524766	0.122287	0.429128	0.66783	0.863427	TRUE	TRUE	TRUE	TRUE	constitutive	0.0637744
chr1	223907279	223909043	chr1	223719577	223721341	STARR_ID1308	940.474	-0.10129	0.0816355	-1.24076	0.214694	0.548197	FALSE	FALSE	FALSE	FALSE	inactive	0.261063
chr1	224074211	224074711	chr1	223886509	223887009	STARR_ID1309	736.34	0.0939511	0.158092	0.594281	0.552324	0.807791	TRUE	TRUE	TRUE	TRUE	constitutive	0.0927011
chr1	11352817	11353132	chr1	11292760	11293075	STARR_ID131	235.15	0.128085	0.159296	0.804067	0.421358	0.730501	FALSE	FALSE	FALSE	FALSE	inactive	0.136379
chr1	224392554	224393054	chr1	224204852	224205352	STARR_ID1311	318.77	-0.250901	0.116787	-2.14836	0.031685	0.18036	TRUE	FALSE	FALSE	FALSE	constitutive	0.74386
chr1	224642071	224642571	chr1	224454369	224454869	STARR_ID1313	318.252	0.0062762	0.142634	0.0440022	0.964903	0.98856	TRUE	TRUE	FALSE	FALSE	constitutive	0.00499686
chr1	224691186	224691686	chr1	224503484	224503984	STARR_ID1314	1407.76	-0.0232067	0.103966	-0.223213	0.82337	0.929678	FALSE	FALSE	FALSE	FALSE	inactive	0.0316673
chr1	224920823	224921323	chr1	224733121	224733621	STARR_ID1315	541.702	-0.0354548	0.0952558	-0.372206	0.709739	0.881564	TRUE	TRUE	FALSE	FALSE	constitutive	0.0547463
chr1	225091519	225092019	chr1	224903817	224904317	STARR_ID1316	775.258	0.477834	0.100246	4.76663	1.87332e-06	2.51046e-05	FALSE	TRUE	FALSE	FALSE	constitutive	4.60025
chr1	225638217	225638717	chr1	225450515	225451015	STARR_ID1318	869.758	0.117791	0.10023	1.17521	0.239912	0.575683	FALSE	FALSE	FALSE	FALSE	inactive	0.239816
chr1	225641700	225642200	chr1	225453998	225454498	STARR_ID1319	3256.44	0.0032983	0.258427	0.012763	0.989817	0.997587	TRUE	TRUE	FALSE	FALSE	constitutive	0.00104932
chr1	225960266	225960766	chr1	225772564	225773064	STARR_ID1322	208.988	-0.061959	0.134815	-0.459584	0.645815	0.851735	FALSE	FALSE	FALSE	FALSE	inactive	0.0696956
chr1	226063013	226063513	chr1	225875313	225875813	STARR_ID1324	1604.25	0.0429963	0.121847	0.352873	0.724184	0.887346	TRUE	TRUE	TRUE	TRUE	constitutive	0.0519072
chr1	11434237	11435208	chr1	11374180	11375151	STARR_ID133	3050.06	0.807231	0.201834	3.99949	6.348e-05	0.000725	TRUE	TRUE	FALSE	FALSE	constitutive	3.13966
chr1	226249485	226250480	chr1	226061784	226062779	STARR_ID1331	12971.4	0.0829131	0.154732	0.53585	0.592062	0.82534	TRUE	TRUE	FALSE	TRUE	constitutive	0.0833672
chr1	226320743	226321243	chr1	226133042	226133542	STARR_ID1335	1290.29	-0.169467	0.0784596	-2.15993	0.0307782	0.175758	FALSE	FALSE	FALSE	FALSE	inactive	0.755086
chr1	226667093	226667593	chr1	226479392	226479892	STARR_ID1338	2556.41	-0.244331	0.115213	-2.12069	0.0339478	0.190184	TRUE	TRUE	TRUE	TRUE	constitutive	0.720825
chr1	226826242	226826742	chr1	226638541	226639041	STARR_ID1339	1518.37	0.00257059	0.0836348	0.0307358	0.97548	0.992111	TRUE	TRUE	FALSE	FALSE	constitutive	0.00343954
chr1	226885599	226886099	chr1	226697898	226698398	STARR_ID1342	343.972	-0.058623	0.107713	-0.544252	0.586268	0.822674	FALSE	FALSE	FALSE	FALSE	inactive	0.084772
chr1	226890635	226891135	chr1	226702934	226703434	STARR_ID1343	1145.77	0.0175812	0.163007	0.107856	0.91411	0.967144	TRUE	TRUE	FALSE	FALSE	constitutive	0.0145088
chr1	227002774	227003274	chr1	226815073	226815573	STARR_ID1344	611.166	0.0199508	0.191122	0.104387	0.916862	0.967972	TRUE	TRUE	FALSE	FALSE	constitutive	0.0141373
chr1	227616476	227616979	chr1	227428775	227429278	STARR_ID1347	296.226	-0.045697	0.16474	-0.277389	0.781481	0.912643	TRUE	TRUE	FALSE	FALSE	constitutive	0.039699
chr1	11544259	11544759	chr1	11484202	11484702	STARR_ID135	1053.48	-0.0427737	0.183067	-0.23365	0.815257	0.926347	FALSE	FALSE	FALSE	FALSE	inactive	0.0332265
chr1	228124536	228125036	chr1	227936835	227937335	STARR_ID1350	4358.78	-0.0732407	0.101966	-0.718287	0.47258	0.761073	TRUE	TRUE	FALSE	FALSE	constitutive	0.118574
chr1	228857126	228857626	chr1	228721379	228721879	STARR_ID1353	404.851	-0.219122	0.126035	-1.73858	0.0821081	0.335699	TRUE	TRUE	FALSE	FALSE	constitutive	0.47405
chr1	228871867	228872367	chr1	228736120	228736620	STARR_ID1354	2139.69	0.115244	0.144208	0.79915	0.424203	0.731687	FALSE	FALSE	FALSE	FALSE	inactive	0.135675
chr1	228875144	228875644	chr1	228739397	228739897	STARR_ID1355	1473.54	-0.187368	0.0663814	-2.8226	0.00476361	0.0382024	TRUE	TRUE	FALSE	FALSE	constitutive	1.41791
chr1	228997003	228997358	chr1	228861256	228861611	STARR_ID1357	1790.65	-0.107695	0.135903	-0.792435	0.428107	0.734346	FALSE	FALSE	FALSE	FALSE	inactive	0.134099
chr1	229038710	229039210	chr1	228902963	228903463	STARR_ID1358	440.367	-0.0285387	0.114094	-0.250134	0.802483	0.921738	FALSE	FALSE	FALSE	FALSE	inactive	0.0353927
chr1	229139193	229139693	chr1	229003446	229003946	STARR_ID1359	1481.01	-0.0328189	0.0812754	-0.403798	0.686361	0.871219	TRUE	TRUE	FALSE	FALSE	constitutive	0.0598728
chr1	229229286	229229786	chr1	229093539	229094039	STARR_ID1360	320.638	-0.230771	0.131928	-1.74922	0.0802526	0.331274	TRUE	TRUE	FALSE	FALSE	constitutive	0.479813
chr1	229300919	229301690	chr1	229165172	229165943	STARR_ID1361	2390	0.383495	0.132717	2.88956	0.00385779	0.0317186	TRUE	TRUE	FALSE	FALSE	constitutive	1.49869
chr1	229335045	229335545	chr1	229199298	229199798	STARR_ID1364	542.127	-0.122232	0.0956962	-1.27729	0.201499	0.533844	FALSE	FALSE	FALSE	FALSE	inactive	0.272586
chr1	229357124	229357624	chr1	229221377	229221877	STARR_ID1365	1009.27	-0.137881	0.119253	-1.15621	0.247596	0.584144	TRUE	TRUE	TRUE	TRUE	constitutive	0.23348
chr1	229409461	229409961	chr1	229273714	229274214	STARR_ID1368	196.86	-0.312941	0.12834	-2.43837	0.0147535	0.0991823	TRUE	FALSE	FALSE	FALSE	constitutive	1.00357
chr1	229517609	229518112	chr1	229381862	229382365	STARR_ID1369	4638.84	1.48231	0.146013	10.1519	3.25091e-24	1.741e-22	TRUE	TRUE	TRUE	TRUE	induced	21.7592
chr1	229850578	229851078	chr1	229714831	229715331	STARR_ID1370	439.548	-0.123849	0.120452	-1.02821	0.303852	0.640622	TRUE	TRUE	FALSE	FALSE	constitutive	0.193398
chr1	229980353	229980853	chr1	229844606	229845106	STARR_ID1372	363.025	0.0164239	0.104019	0.157893	0.874541	0.952694	FALSE	FALSE	FALSE	FALSE	inactive	0.0210464
chr1	230028336	230028836	chr1	229892589	229893089	STARR_ID1374	97.6163	-0.0866207	0.157078	-0.551449	0.581326	0.820975	FALSE	FALSE	FALSE	FALSE	inactive	0.0856699
chr1	230220207	230220707	chr1	230084460	230084960	STARR_ID1376	6977.47	0.106362	0.210755	0.504669	0.613791	0.835938	TRUE	TRUE	TRUE	TRUE	constitutive	0.0778258
chr1	230402947	230403447	chr1	230267201	230267701	STARR_ID1380	1380.64	-0.157402	0.0718788	-2.18982	0.0285372	0.166589	FALSE	FALSE	FALSE	FALSE	inactive	0.778355
chr1	230487274	230487835	chr1	230351528	230352089	STARR_ID1383	231.283	0.604036	0.114671	5.26754	1.38267e-07	2.05946e-06	FALSE	TRUE	FALSE	FALSE	constitutive	5.68625
chr1	230636162	230636761	chr1	230500416	230501015	STARR_ID1384	553.075	2.09711	0.213432	9.82567	8.72929e-23	4.23119e-21	TRUE	TRUE	FALSE	TRUE	induced	20.3735
chr1	230883871	230885230	chr1	230748125	230749484	STARR_ID1387	2132.39	-0.107566	0.0735678	-1.46214	0.143703	0.453601	TRUE	TRUE	FALSE	FALSE	constitutive	0.343326
chr1	230893843	230894343	chr1	230758097	230758597	STARR_ID1389	392.491	-0.171586	0.114063	-1.50431	0.132502	0.435953	TRUE	TRUE	FALSE	FALSE	constitutive	0.36056
chr1	230896016	230896516	chr1	230760270	230760770	STARR_ID1390	607.343	-0.0793255	0.0837828	-0.9468	0.343741	0.674699	FALSE	FALSE	FALSE	FALSE	inactive	0.17089
chr1	230999197	230999697	chr1	230863451	230863951	STARR_ID1391	434.361	-0.0515466	0.129769	-0.397217	0.691208	0.872321	TRUE	TRUE	FALSE	FALSE	constitutive	0.0593239
chr1	231275574	231276074	chr1	231139828	231140328	STARR_ID1392	598.093	-0.107225	0.111705	-0.959889	0.337111	0.669772	FALSE	FALSE	FALSE	FALSE	inactive	0.174073
chr1	231913768	231914268	chr1	231778022	231778522	STARR_ID1398	991.552	-0.274022	0.113883	-2.40618	0.0161202	0.107056	TRUE	TRUE	TRUE	FALSE	constitutive	0.970388
chr1	231989591	231990015	chr1	231853845	231854269	STARR_ID1399	934.075	1.14696	0.12934	8.86782	7.45922e-19	2.68663e-17	TRUE	TRUE	FALSE	TRUE	induced	16.5708
chr1	232300057	232300557	chr1	232164311	232164811	STARR_ID1401	79.9341	-0.00379932	0.194908	-0.0194929	0.984448	0.995323	FALSE	FALSE	FALSE	FALSE	inactive	0.00203596
chr1	232458040	232458540	chr1	232322294	232322794	STARR_ID1403	843.268	-0.0237195	0.0755062	-0.31414	0.753415	0.900553	TRUE	TRUE	FALSE	FALSE	constitutive	0.0454906
chr1	232680209	232680709	chr1	232544463	232544963	STARR_ID1407	260.065	-0.0501113	0.17722	-0.282763	0.777359	0.910604	FALSE	FALSE	FALSE	FALSE	inactive	0.0406702
chr1	232736238	232736747	chr1	232600492	232601001	STARR_ID1408	1560.22	-0.121654	0.176375	-0.689746	0.490354	0.77259	TRUE	TRUE	FALSE	FALSE	constitutive	0.112051
chr1	233004668	233005168	chr1	232868922	232869422	STARR_ID1414	658.333	-0.0923	0.165235	-0.558598	0.576436	0.818754	FALSE	FALSE	FALSE	FALSE	inactive	0.0868464
chr1	233217326	233217826	chr1	233081580	233082080	STARR_ID1416	343.591	0.450087	0.0964402	4.66701	3.05613e-06	4.00179e-05	FALSE	TRUE	FALSE	FALSE	constitutive	4.39775
chr1	233243108	233244047	chr1	233107362	233108301	STARR_ID1417	835.313	0.114161	0.164176	0.695359	0.486831	0.770214	TRUE	TRUE	FALSE	FALSE	constitutive	0.113389
chr1	233248627	233249127	chr1	233112881	233113381	STARR_ID1418	767.564	-0.101323	0.159861	-0.633819	0.526199	0.793265	TRUE	TRUE	FALSE	FALSE	constitutive	0.100582
chr1	12290779	12291861	chr1	12230722	12231804	STARR_ID142	5706.75	-0.100843	0.098005	-1.02896	0.303498	0.640359	TRUE	TRUE	FALSE	FALSE	constitutive	0.193576
chr1	233679158	233679658	chr1	233543412	233543912	STARR_ID1420	511.886	0.0886597	0.0958184	0.925289	0.354816	0.682657	FALSE	TRUE	FALSE	FALSE	constitutive	0.165797
chr1	233813593	233813850	chr1	233677847	233678104	STARR_ID1422	250.071	0.221128	0.197268	1.12095	0.26231	0.599835	FALSE	FALSE	FALSE	FALSE	inactive	0.221968
chr1	233850553	233851053	chr1	233714807	233715307	STARR_ID1423	315.995	-0.0786888	0.102721	-0.766045	0.443649	0.743175	TRUE	TRUE	FALSE	FALSE	constitutive	0.128909
chr1	234588272	234588772	chr1	234452526	234453026	STARR_ID1426	199.133	0.0593997	0.136627	0.434757	0.663739	0.861143	FALSE	FALSE	FALSE	FALSE	inactive	0.0649247
chr1	234700400	234700900	chr1	234564654	234565154	STARR_ID1429	404.481	0.0770605	0.226219	0.340645	0.733371	0.891327	TRUE	TRUE	FALSE	FALSE	constitutive	0.0499628
chr1	234748149	234748979	chr1	234612403	234613233	STARR_ID1432	5100.3	-0.148241	0.10967	-1.3517	0.17647	0.500566	TRUE	TRUE	FALSE	FALSE	constitutive	0.300539
chr1	234774767	234775267	chr1	234639021	234639521	STARR_ID1434	311.262	-0.058268	0.102479	-0.568587	0.569637	0.81514	FALSE	FALSE	FALSE	FALSE	inactive	0.0887677
chr1	234803850	234804350	chr1	234668104	234668604	STARR_ID1435	1230.63	1.62174	0.20432	7.93728	2.06669e-15	5.69395e-14	TRUE	TRUE	FALSE	TRUE	induced	13.2446
chr1	234819949	234820449	chr1	234684203	234684703	STARR_ID1436	353.784	0.0802601	0.110222	0.72817	0.46651	0.757939	TRUE	TRUE	FALSE	FALSE	constitutive	0.120366
chr1	234859154	234860638	chr1	234723407	234724891	STARR_ID1437	851.736	-0.0491956	0.077083	-0.638216	0.523333	0.792505	FALSE	FALSE	FALSE	FALSE	inactive	0.100998
chr1	12538147	12538647	chr1	12478092	12478592	STARR_ID144	1510.03	-0.167298	0.156687	-1.06772	0.285646	0.623771	TRUE	FALSE	FALSE	FALSE	constitutive	0.204975
chr1	235003043	235003543	chr1	234867296	234867796	STARR_ID1440	1184.13	-0.0408968	0.0916278	-0.446337	0.655354	0.856103	TRUE	TRUE	FALSE	FALSE	constitutive	0.0674738
chr1	235011267	235012661	chr1	234875520	234876914	STARR_ID1441	2768.23	-0.0635969	0.0635639	-1.00052	0.317059	0.652243	TRUE	TRUE	FALSE	FALSE	constitutive	0.18559
chr1	235093104	235093604	chr1	234957357	234957857	STARR_ID1446	820.294	-0.155709	0.116516	-1.33638	0.181425	0.508964	TRUE	TRUE	FALSE	FALSE	constitutive	0.293313
chr1	235096471	235096971	chr1	234960724	234961224	STARR_ID1447	469.421	-0.173502	0.0913273	-1.89979	0.0574612	0.272246	TRUE	FALSE	FALSE	FALSE	constitutive	0.565039
chr1	235132932	235133432	chr1	234997185	234997685	STARR_ID1449	950.33	-0.106613	0.0932034	-1.14388	0.252674	0.589589	TRUE	TRUE	FALSE	FALSE	constitutive	0.229451
chr1	12546242	12547137	chr1	12486187	12487082	STARR_ID145	1715.69	0.256614	0.11168	2.29776	0.0215753	0.134284	TRUE	TRUE	FALSE	FALSE	constitutive	0.871976
chr1	235142368	235142868	chr1	235006621	235007121	STARR_ID1450	554.924	0.465307	0.120361	3.86593	0.000110665	0.00122857	FALSE	FALSE	FALSE	FALSE	inactive	2.9106
chr1	235242286	235243457	chr1	235078972	235080143	STARR_ID1451	1786.98	-0.0761078	0.0816218	-0.932444	0.351107	0.680356	FALSE	FALSE	FALSE	FALSE	inactive	0.167264
chr1	235459283	235459783	chr1	235295968	235296468	STARR_ID1452	2532.96	-0.0198388	0.09844	-0.201532	0.840283	0.937589	TRUE	TRUE	FALSE	FALSE	constitutive	0.0279875
chr1	235793715	235794215	chr1	235630415	235630915	STARR_ID1453	1323.09	0.128511	0.0879734	1.46079	0.144072	0.453921	TRUE	TRUE	FALSE	FALSE	constitutive	0.34302
chr1	235805004	235805504	chr1	235641704	235642204	STARR_ID1454	1086.83	0.661489	0.128009	5.16751	2.37236e-07	3.43344e-06	TRUE	TRUE	FALSE	TRUE	constitutive	5.46427
chr1	236562870	236563370	chr1	236399570	236400070	STARR_ID1456	604.747	-0.170594	0.0815543	-2.09179	0.0364577	0.199167	TRUE	FALSE	FALSE	FALSE	constitutive	0.700782
chr1	236678550	236679050	chr1	236515250	236515750	STARR_ID1457	266.171	0.0428705	0.110497	0.38798	0.698031	0.875191	FALSE	FALSE	FALSE	FALSE	inactive	0.0578974
chr1	239882286	239883081	chr1	239718986	239719781	STARR_ID1460	728.208	-0.141053	0.190667	-0.739788	0.459429	0.753702	FALSE	FALSE	FALSE	FALSE	inactive	0.1228
chr1	240042546	240043046	chr1	239879246	239879746	STARR_ID1462	407.333	-0.180789	0.0974295	-1.85559	0.0635123	0.289112	TRUE	TRUE	FALSE	FALSE	constitutive	0.538934
chr1	240685443	240686246	chr1	240522143	240522946	STARR_ID1463	295.521	-0.163731	0.138108	-1.18553	0.235807	0.570718	FALSE	FALSE	FALSE	FALSE	inactive	0.243579
chr1	241428501	241429001	chr1	241265201	241265701	STARR_ID1464	379.864	0.0356511	0.0933514	0.381902	0.702534	0.877263	FALSE	FALSE	FALSE	FALSE	inactive	0.0568704
chr1	241964411	241964911	chr1	241801109	241801609	STARR_ID1466	140.085	0.0810625	0.182097	0.445161	0.656203	0.856714	TRUE	TRUE	FALSE	FALSE	constitutive	0.0671643
chr1	243418572	243419001	chr1	243255270	243255699	STARR_ID1467	1065.72	-0.128324	0.112367	-1.14201	0.25345	0.590048	TRUE	FALSE	FALSE	FALSE	constitutive	0.229113
chr1	12608946	12610421	chr1	12548916	12550393	STARR_ID147	9470.24	0.434481	0.154206	2.81754	0.00483926	0.0387656	TRUE	TRUE	TRUE	TRUE	constitutive	1.41155
chr1	244417450	244417950	chr1	244254148	244254648	STARR_ID1473	644.376	-0.202498	0.0915881	-2.21096	0.0270384	0.160358	TRUE	TRUE	FALSE	FALSE	constitutive	0.794911
chr1	244815987	244816376	chr1	244652685	244653074	STARR_ID1475	3399.99	-0.0866551	0.134665	-0.643485	0.519909	0.790618	TRUE	TRUE	FALSE	FALSE	constitutive	0.102033
chr1	245118754	245119254	chr1	244955452	244955952	STARR_ID1477	295.762	0.653854	0.167762	3.89751	9.71851e-05	0.00108736	FALSE	TRUE	FALSE	FALSE	constitutive	2.96363
chr1	245210037	245210537	chr1	245046735	245047235	STARR_ID1478	353.765	0.0849946	0.105101	0.808694	0.418691	0.729398	TRUE	TRUE	FALSE	FALSE	constitutive	0.137036
chr1	12654842	12656419	chr1	12594829	12596406	STARR_ID148	22803.5	-0.248788	0.242847	-1.02446	0.305617	0.642178	TRUE	TRUE	FALSE	FALSE	constitutive	0.192345
chr1	245421622	245422122	chr1	245258320	245258820	STARR_ID1480	1382.05	-0.0669648	0.102442	-0.653685	0.513315	0.786221	FALSE	FALSE	FALSE	FALSE	inactive	0.104456
chr1	245499449	245500420	chr1	245336147	245337118	STARR_ID1482	1751.96	0.267787	0.116451	2.29956	0.0214733	0.133731	FALSE	FALSE	FALSE	FALSE	inactive	0.873767
chr1	245966275	245966775	chr1	245802973	245803473	STARR_ID1484	214.464	0.416532	0.130822	3.18396	0.00145276	0.0132735	FALSE	TRUE	FALSE	FALSE	constitutive	1.87702
chr1	246229753	246230388	chr1	246066451	246067086	STARR_ID1486	284.53	-0.125195	0.225478	-0.555242	0.578729	0.819815	FALSE	FALSE	FALSE	FALSE	inactive	0.0862843
chr1	246642399	246642899	chr1	246479097	246479597	STARR_ID1487	2311.57	0.284439	0.245916	1.15665	0.247416	0.583987	FALSE	FALSE	FALSE	FALSE	inactive	0.233597
chr1	246666535	246667035	chr1	246503233	246503733	STARR_ID1488	483.096	-0.179013	0.0905792	-1.97631	0.0481193	0.241848	TRUE	TRUE	FALSE	FALSE	constitutive	0.616457
chr1	246772083	246772583	chr1	246608781	246609281	STARR_ID1489	2045.63	-0.169375	0.14204	-1.19244	0.233089	0.568722	TRUE	TRUE	TRUE	TRUE	constitutive	0.2451
chr1	1207835	1208335	chr1	1272455	1272955	STARR_ID15	2363.32	-0.0654729	0.112699	-0.580954	0.561271	0.811634	TRUE	TRUE	FALSE	FALSE	constitutive	0.0906395
chr1	12660353	12660853	chr1	12600341	12600841	STARR_ID150	9029.13	1.80572	0.153544	11.7603	6.25356e-32	6.35756e-30	TRUE	TRUE	FALSE	TRUE	induced	29.1967
chr1	12675997	12676497	chr1	12615993	12616493	STARR_ID151	2086.66	-0.18279	0.084507	-2.16301	0.0305404	0.174679	TRUE	TRUE	FALSE	FALSE	constitutive	0.757759
chr1	13904111	13904611	chr1	13577616	13578116	STARR_ID153	450.005	0.78191	0.118402	6.60388	4.00538e-11	7.71873e-10	FALSE	TRUE	FALSE	FALSE	constitutive	9.11245
chr1	14609122	14609622	chr1	14282627	14283127	STARR_ID157	145.688	-0.276375	0.183144	-1.50906	0.131284	0.433968	FALSE	FALSE	FALSE	FALSE	inactive	0.362542
chr1	15240357	15240901	chr1	14913861	14914405	STARR_ID162	8926	0.770878	0.126737	6.08251	1.18316e-09	2.06316e-08	TRUE	TRUE	FALSE	TRUE	constitutive	7.68547
chr1	15303711	15304211	chr1	14977215	14977715	STARR_ID163	28512.7	1.26593	0.145821	8.6814	3.90924e-18	1.32775e-16	FALSE	TRUE	FALSE	TRUE	induced	15.8769
chr1	15342309	15344033	chr1	15015813	15017537	STARR_ID164	1518.22	0.0453818	0.0832526	0.54511	0.585678	0.822491	TRUE	TRUE	FALSE	FALSE	constitutive	0.0848687
chr1	15351961	15352461	chr1	15025465	15025965	STARR_ID165	516.658	-0.0117418	0.0887328	-0.132328	0.894725	0.961619	TRUE	TRUE	FALSE	FALSE	constitutive	0.0169969
chr1	15556253	15556753	chr1	15229757	15230257	STARR_ID167	485.537	0.533657	0.112432	4.74649	2.06976e-06	2.7582e-05	TRUE	TRUE	FALSE	FALSE	constitutive	4.55937
chr1	15611328	15611828	chr1	15284832	15285332	STARR_ID168	229.112	0.16916	0.146829	1.15208	0.249287	0.585414	FALSE	TRUE	FALSE	FALSE	constitutive	0.232537
chr1	15731643	15732152	chr1	15405147	15405656	STARR_ID169	1103.48	0.455449	0.124958	3.64483	0.000267567	0.00281647	FALSE	FALSE	FALSE	FALSE	inactive	2.55029
chr1	15885758	15886258	chr1	15559263	15559763	STARR_ID172	411.661	-0.287436	0.140321	-2.04842	0.0405187	0.214743	TRUE	FALSE	FALSE	FALSE	constitutive	0.66808
chr1	16126922	16127422	chr1	15800427	15800927	STARR_ID174	1997.13	-0.104665	0.0852319	-1.22801	0.219445	0.553202	TRUE	TRUE	FALSE	FALSE	constitutive	0.257116
chr1	16339426	16339926	chr1	16012931	16013431	STARR_ID177	2865.89	0.0780357	0.0939353	0.830739	0.406121	0.721869	TRUE	TRUE	FALSE	FALSE	constitutive	0.141542
chr1	16421923	16422423	chr1	16095428	16095928	STARR_ID179	503.712	-0.020033	0.0953051	-0.210198	0.833513	0.93463	TRUE	TRUE	FALSE	FALSE	constitutive	0.0293603
chr1	16447444	16447814	chr1	16120949	16121319	STARR_ID180	391.049	-0.136266	0.121316	-1.12323	0.26134	0.59915	FALSE	FALSE	FALSE	FALSE	inactive	0.222464
chr1	16538517	16539424	chr1	16212022	16212929	STARR_ID182	4789.72	-0.109584	0.150851	-0.72644	0.467569	0.75811	TRUE	TRUE	FALSE	FALSE	constitutive	0.120268
chr1	16934797	16935297	chr1	16608302	16608802	STARR_ID186	17418.1	0.591126	0.0799858	7.39039	1.464e-13	3.41498e-12	TRUE	TRUE	TRUE	TRUE	constitutive	11.4666
chr1	16950515	16951015	chr1	16624020	16624520	STARR_ID188	31709.7	-0.114141	0.135216	-0.844136	0.398593	0.716626	TRUE	TRUE	FALSE	FALSE	constitutive	0.144708
chr1	17355932	17356432	chr1	17029437	17029937	STARR_ID192	785.918	1.74909	0.133439	13.1078	2.97285e-39	6.34459e-37	TRUE	TRUE	FALSE	TRUE	induced	36.1976
chr1	17560172	17560672	chr1	17233677	17234177	STARR_ID193	1124.69	-0.22502	0.101765	-2.21118	0.0270237	0.160337	TRUE	TRUE	FALSE	FALSE	constitutive	0.794967
chr1	17563812	17564312	chr1	17237317	17237817	STARR_ID194	13006	2.1495	0.248434	8.65222	5.05058e-18	1.70729e-16	TRUE	TRUE	TRUE	TRUE	induced	15.7677
chr1	17577038	17577538	chr1	17250543	17251043	STARR_ID195	1983.95	0.109056	0.0914941	1.19195	0.233282	0.568722	TRUE	TRUE	FALSE	FALSE	constitutive	0.2451
chr1	17641203	17641703	chr1	17314708	17315208	STARR_ID197	1130.5	0.806264	0.10069	8.0074	1.1716e-15	3.2913e-14	FALSE	TRUE	FALSE	FALSE	constitutive	13.4826
chr1	17755000	17755469	chr1	17428504	17428973	STARR_ID199	163.302	-0.0798285	0.202047	-0.3951	0.692769	0.87312	TRUE	TRUE	FALSE	FALSE	constitutive	0.0589258
chr1	17846797	17847297	chr1	17520301	17520801	STARR_ID200	3924.99	1.49694	0.114477	13.0763	4.49863e-39	9.05999e-37	TRUE	TRUE	FALSE	TRUE	induced	36.0429
chr1	17855923	17856423	chr1	17529427	17529927	STARR_ID201	377.336	0.0525333	0.133413	0.393764	0.693755	0.87318	FALSE	FALSE	FALSE	FALSE	inactive	0.0588961
chr1	17886261	17886761	chr1	17559766	17560266	STARR_ID202	723.777	-0.0100139	0.0747204	-0.134019	0.893388	0.961288	FALSE	FALSE	FALSE	FALSE	inactive	0.0171464
chr1	18205403	18205903	chr1	17878909	17879409	STARR_ID205	1189.79	0.90141	0.0947623	9.51233	1.86443e-21	8.25369e-20	TRUE	TRUE	FALSE	TRUE	constitutive	19.0834
chr1	18710509	18711009	chr1	18384015	18384515	STARR_ID207	894.154	0.0319388	0.0830727	0.384468	0.700631	0.876034	FALSE	FALSE	FALSE	FALSE	inactive	0.0574791
chr1	18790920	18791420	chr1	18464426	18464926	STARR_ID208	1142.27	-0.0625218	0.0994192	-0.628871	0.529434	0.795124	FALSE	FALSE	FALSE	FALSE	inactive	0.0995653
chr1	18861986	18862486	chr1	18535492	18535992	STARR_ID210	1891.02	-0.32629	0.153558	-2.12487	0.0335976	0.188693	TRUE	TRUE	FALSE	FALSE	constitutive	0.724244
chr1	18925468	18925968	chr1	18598974	18599474	STARR_ID211	1070.87	-0.00394633	0.0945237	-0.0417497	0.966698	0.989005	FALSE	FALSE	FALSE	FALSE	inactive	0.00480143
chr1	19215081	19215430	chr1	18888587	18888936	STARR_ID212	1739.98	0.338612	0.095309	3.55278	0.000381185	0.00389604	TRUE	TRUE	FALSE	FALSE	constitutive	2.40938
chr1	19680922	19681582	chr1	19354428	19355088	STARR_ID214	1013.1	0.0134149	0.0811	0.165412	0.86862	0.951621	FALSE	FALSE	FALSE	FALSE	inactive	0.021536
chr1	19686771	19687271	chr1	19360277	19360777	STARR_ID215	246.912	-0.00242562	0.127039	-0.0190936	0.984766	0.995323	TRUE	TRUE	FALSE	FALSE	constitutive	0.00203596
chr1	19751184	19754097	chr1	19424690	19427603	STARR_ID216	2956.93	-0.0714081	0.0706414	-1.01085	0.312086	0.647587	FALSE	FALSE	FALSE	FALSE	inactive	0.188702
chr1	19777234	19777734	chr1	19450740	19451240	STARR_ID218	644.515	-0.177167	0.106444	-1.66442	0.0960289	0.367242	TRUE	FALSE	FALSE	FALSE	constitutive	0.435048
chr1	19798647	19799147	chr1	19472153	19472653	STARR_ID220	453.098	-0.21788	0.12419	-1.75442	0.0793592	0.32882	FALSE	FALSE	FALSE	FALSE	inactive	0.483042
chr1	19922796	19924098	chr1	19596302	19597604	STARR_ID223	14132.3	1.27301	0.138516	9.19037	3.91479e-20	1.54634e-18	TRUE	TRUE	TRUE	TRUE	induced	17.8107
chr1	19933584	19934084	chr1	19607090	19607590	STARR_ID224	34.1569	0.445782	0.279704	1.59376	0.110989	0.396052	FALSE	FALSE	FALSE	FALSE	inactive	0.402248
chr1	19946239	19946739	chr1	19619745	19620245	STARR_ID225	107.538	-0.147327	0.180353	-0.816885	0.413994	0.727083	FALSE	FALSE	FALSE	FALSE	inactive	0.138416
chr1	20576952	20577452	chr1	20250459	20250959	STARR_ID229	335.824	-0.325183	0.148959	-2.18303	0.0290332	0.168759	TRUE	FALSE	FALSE	FALSE	constitutive	0.772734
chr1	20860040	20860539	chr1	20533547	20534046	STARR_ID231	828.707	-0.1968	0.100574	-1.95676	0.0503761	0.248475	FALSE	FALSE	FALSE	FALSE	inactive	0.604718
chr1	20940136	20940636	chr1	20613643	20614143	STARR_ID232	1748.64	-0.165939	0.182531	-0.909102	0.363297	0.689328	TRUE	TRUE	TRUE	FALSE	constitutive	0.161574
chr1	21111221	21111721	chr1	20784728	20785228	STARR_ID234	170.645	-0.0446903	0.136239	-0.328028	0.742891	0.895816	FALSE	FALSE	FALSE	FALSE	inactive	0.047781
chr1	21223269	21223769	chr1	20896776	20897276	STARR_ID235	54.9307	0.0225665	0.272166	0.0829144	0.93392	0.975839	TRUE	TRUE	TRUE	TRUE	constitutive	0.0106218
chr1	21390486	21390986	chr1	21063993	21064493	STARR_ID236	331.126	-0.0496099	0.144425	-0.343499	0.731223	0.890458	FALSE	FALSE	FALSE	FALSE	inactive	0.0503864
chr1	21568134	21569822	chr1	21241641	21243329	STARR_ID237	585.405	-0.0305781	0.0916483	-0.333646	0.738647	0.893563	FALSE	FALSE	FALSE	FALSE	inactive	0.048875
chr1	21578311	21578922	chr1	21251818	21252429	STARR_ID239	924.963	-0.074835	0.121438	-0.616241	0.537735	0.799613	FALSE	FALSE	FALSE	FALSE	inactive	0.0971203
chr1	1724811	1725311	chr1	1793372	1793872	STARR_ID24	1546.07	0.0685232	0.110853	0.618147	0.536479	0.798355	FALSE	FALSE	FALSE	FALSE	inactive	0.0978039
chr1	21581071	21581597	chr1	21254578	21255104	STARR_ID240	2079.79	-0.0928958	0.0709949	-1.30848	0.190709	0.521106	TRUE	TRUE	FALSE	FALSE	constitutive	0.283074
chr1	21594642	21595517	chr1	21268149	21269024	STARR_ID241	3817.79	-0.0604639	0.0697497	-0.866869	0.386014	0.707349	FALSE	FALSE	FALSE	FALSE	inactive	0.150366
chr1	21602986	21605294	chr1	21276493	21278801	STARR_ID242	1767.63	-0.123617	0.0750652	-1.64679	0.0996006	0.374742	FALSE	FALSE	FALSE	FALSE	inactive	0.426267
chr1	21650847	21651347	chr1	21324354	21324854	STARR_ID245	1679.63	-0.138233	0.138215	-1.00013	0.317247	0.652332	TRUE	TRUE	TRUE	TRUE	constitutive	0.185531
chr1	21655936	21656436	chr1	21329443	21329943	STARR_ID246	838.636	-0.135735	0.114318	-1.18735	0.23509	0.570296	FALSE	FALSE	FALSE	FALSE	inactive	0.2439
chr1	21665228	21665728	chr1	21338735	21339235	STARR_ID248	824.171	-0.0780437	0.102371	-0.762363	0.445844	0.744328	FALSE	FALSE	FALSE	FALSE	inactive	0.128236
chr1	21953270	21953770	chr1	21626777	21627277	STARR_ID251	4475.32	-0.15848	0.153182	-1.03459	0.300861	0.637888	TRUE	TRUE	FALSE	FALSE	constitutive	0.195256
chr1	21959450	21962293	chr1	21632957	21635800	STARR_ID252	13783.8	-0.0977952	0.112005	-0.873129	0.382593	0.705442	TRUE	TRUE	FALSE	FALSE	constitutive	0.151539
chr1	21965376	21965876	chr1	21638883	21639383	STARR_ID253	2807.76	-0.12433	0.133306	-0.932668	0.350991	0.680334	TRUE	TRUE	FALSE	FALSE	constitutive	0.167278
chr1	22002695	22003195	chr1	21676202	21676702	STARR_ID254	73.8884	-0.379722	0.191451	-1.98339	0.0473244	0.239283	TRUE	FALSE	FALSE	FALSE	constitutive	0.621089
chr1	22231165	22231665	chr1	21904672	21905172	STARR_ID257	1846.56	0.027531	0.0611197	0.450444	0.652391	0.854574	FALSE	FALSE	FALSE	FALSE	inactive	0.0682502
chr1	22283399	22283899	chr1	21956906	21957406	STARR_ID260	2572.48	-0.0547726	0.0934157	-0.586332	0.557652	0.809823	TRUE	TRUE	FALSE	FALSE	constitutive	0.0916098
chr1	22582197	22582697	chr1	22255704	22256204	STARR_ID265	466.611	-0.317999	0.0974184	-3.26426	0.00109751	0.0102772	FALSE	FALSE	FALSE	FALSE	inactive	1.98812
chr1	22586142	22586705	chr1	22259649	22260212	STARR_ID267	2240.73	-0.110402	0.0943774	-1.16979	0.242085	0.577796	FALSE	FALSE	FALSE	FALSE	inactive	0.238225
chr1	22615418	22615749	chr1	22288925	22289256	STARR_ID269	945.37	0.592756	0.151241	3.91927	8.88167e-05	0.000997635	TRUE	TRUE	FALSE	TRUE	constitutive	3.00103
chr1	22674832	22675332	chr1	22348339	22348839	STARR_ID271	617.907	-0.0576502	0.0867736	-0.664376	0.50645	0.783313	TRUE	TRUE	FALSE	FALSE	constitutive	0.106065
chr1	22739097	22739597	chr1	22412604	22413104	STARR_ID272	1045.9	-0.016641	0.173142	-0.0961122	0.923431	0.970822	TRUE	FALSE	FALSE	FALSE	constitutive	0.0128605
chr1	22740747	22741247	chr1	22414254	22414754	STARR_ID273	4383.9	-0.336749	0.0991247	-3.39723	0.000680719	0.00665531	TRUE	TRUE	TRUE	TRUE	constitutive	2.17683
chr1	22799060	22799560	chr1	22472567	22473067	STARR_ID274	416.697	0.301524	0.120298	2.50648	0.012194	0.0849719	FALSE	TRUE	FALSE	FALSE	constitutive	1.07072
chr1	22853547	22854047	chr1	22527054	22527554	STARR_ID275	513.216	0.113981	0.117154	0.972909	0.330598	0.663471	FALSE	FALSE	FALSE	FALSE	inactive	0.178178
chr1	22952315	22952892	chr1	22625822	22626399	STARR_ID276	6372.9	2.45666	0.195604	12.5594	3.53199e-36	5.61155e-34	FALSE	TRUE	FALSE	TRUE	induced	33.2509
chr1	23153167	23153667	chr1	22826674	22827174	STARR_ID277	1363.42	-0.188474	0.145086	-1.29905	0.193927	0.524838	TRUE	TRUE	FALSE	FALSE	constitutive	0.279975
chr1	23778447	23778947	chr1	23451954	23452454	STARR_ID283	1731.7	-0.0527562	0.154728	-0.340962	0.733132	0.891232	FALSE	FALSE	FALSE	FALSE	inactive	0.050009
chr1	23799672	23800172	chr1	23473179	23473679	STARR_ID284	739.387	-0.163522	0.0865596	-1.88913	0.0588746	0.276651	FALSE	FALSE	FALSE	FALSE	inactive	0.558068
chr1	23857403	23857902	chr1	23530911	23531410	STARR_ID286	2060.1	0.297286	0.0832032	3.57301	0.000352895	0.00362764	TRUE	TRUE	FALSE	TRUE	constitutive	2.44038
chr1	23912097	23912572	chr1	23585607	23586082	STARR_ID287	956.209	-0.101074	0.126091	-0.80159	0.42279	0.73067	TRUE	TRUE	TRUE	TRUE	constitutive	0.136279
chr1	24053886	24054386	chr1	23727396	23727896	STARR_ID289	809.639	-0.168011	0.127464	-1.31811	0.187468	0.517223	TRUE	TRUE	FALSE	FALSE	constitutive	0.286323
chr1	24528467	24530367	chr1	24201977	24203877	STARR_ID292	1181.88	-0.0135688	0.0983826	-0.137918	0.890305	0.959539	FALSE	FALSE	FALSE	FALSE	inactive	0.0179375
chr1	24621118	24621618	chr1	24294628	24295128	STARR_ID294	299.476	-0.0833929	0.160984	-0.518021	0.604444	0.831786	FALSE	FALSE	FALSE	FALSE	inactive	0.0799884
chr1	24894447	24894947	chr1	24567956	24568456	STARR_ID299	988.869	0.100827	0.0843117	1.19589	0.23174	0.568098	FALSE	TRUE	FALSE	FALSE	constitutive	0.245577
chr1	25579164	25579664	chr1	25252673	25253173	STARR_ID303	488.302	-0.00144345	0.0883577	-0.0163365	0.986966	0.996211	FALSE	FALSE	FALSE	FALSE	inactive	0.0016487
chr1	25785292	25785792	chr1	25458801	25459301	STARR_ID304	360.955	-0.0290329	0.136739	-0.212323	0.831855	0.933649	FALSE	FALSE	FALSE	FALSE	inactive	0.0298162
chr1	25802690	25803190	chr1	25476199	25476699	STARR_ID305	132.875	-0.0316196	0.175933	-0.179725	0.857368	0.945866	FALSE	FALSE	FALSE	FALSE	inactive	0.0241703
chr1	25827389	25827889	chr1	25500898	25501398	STARR_ID307	145.932	-0.0488558	0.153165	-0.318974	0.749746	0.899005	FALSE	FALSE	FALSE	FALSE	inactive	0.0462378
chr1	25893096	25895322	chr1	25566605	25568831	STARR_ID308	4285.83	-0.0833262	0.0549966	-1.51512	0.129743	0.431799	TRUE	TRUE	FALSE	FALSE	constitutive	0.364718
chr1	25900061	25900561	chr1	25573570	25574070	STARR_ID309	5881.74	-0.188021	0.104128	-1.80567	0.0709706	0.308008	TRUE	TRUE	FALSE	FALSE	constitutive	0.511438
chr1	26083557	26084063	chr1	25757066	25757572	STARR_ID311	987.044	0.336433	0.0819973	4.10298	4.07865e-05	0.000476475	FALSE	TRUE	FALSE	FALSE	constitutive	3.32196
chr1	26099827	26100552	chr1	25773336	25774061	STARR_ID312	452.027	-0.0987206	0.105265	-0.937827	0.348333	0.677835	FALSE	FALSE	FALSE	FALSE	inactive	0.168876
chr1	26324136	26325127	chr1	25997645	25998636	STARR_ID314	3931.4	-0.0295028	0.0940923	-0.313552	0.753861	0.900614	TRUE	TRUE	FALSE	FALSE	constitutive	0.0454614
chr1	26345091	26345591	chr1	26018600	26019100	STARR_ID315	1141.02	-0.0183374	0.123241	-0.148794	0.881717	0.955192	FALSE	FALSE	FALSE	FALSE	inactive	0.0199093
chr1	2457457	2458120	chr1	2526018	2526681	STARR_ID32	9183.65	0.0406459	0.087398	0.465066	0.641884	0.849213	TRUE	TRUE	FALSE	FALSE	constitutive	0.0709832
chr1	27165182	27165682	chr1	26838691	26839191	STARR_ID320	2575.61	0.583495	0.12664	4.60751	4.0752e-06	5.27343e-05	TRUE	TRUE	FALSE	FALSE	constitutive	4.27791
chr1	27274582	27275082	chr1	26948091	26948591	STARR_ID321	371.461	-0.00375932	0.115828	-0.0324561	0.974108	0.991937	FALSE	FALSE	FALSE	FALSE	inactive	0.00351605
chr1	27468029	27468529	chr1	27141538	27142038	STARR_ID326	1083.19	-0.0587509	0.0823949	-0.71304	0.475821	0.762988	FALSE	FALSE	FALSE	FALSE	inactive	0.117482
chr1	27469847	27471382	chr1	27143356	27144891	STARR_ID327	713.898	-0.100002	0.0814435	-1.22787	0.219496	0.553202	FALSE	FALSE	FALSE	FALSE	inactive	0.257116
chr1	2466347	2466847	chr1	2534908	2535408	STARR_ID33	2607.12	-0.074464	0.136775	-0.544427	0.586148	0.822674	TRUE	TRUE	FALSE	FALSE	constitutive	0.084772
chr1	27928171	27928671	chr1	27601660	27602160	STARR_ID331	2711.91	-0.0995967	0.0760676	-1.30932	0.190426	0.520732	TRUE	TRUE	FALSE	FALSE	constitutive	0.283386
chr1	28640475	28640975	chr1	28313964	28314464	STARR_ID332	1296.26	0.1422	0.0994741	1.42952	0.152856	0.465733	TRUE	TRUE	FALSE	FALSE	constitutive	0.331863
chr1	29554101	29554601	chr1	29227589	29228089	STARR_ID335	465.743	-0.135865	0.100003	-1.35861	0.174271	0.497188	FALSE	FALSE	FALSE	FALSE	inactive	0.303479
chr1	30775764	30776264	chr1	30302917	30303417	STARR_ID338	1733.16	1.11226	0.149643	7.43278	1.06343e-13	2.51754e-12	FALSE	TRUE	FALSE	FALSE	induced	11.599
chr1	30891286	30891786	chr1	30418439	30418939	STARR_ID339	789.353	-0.217354	0.109857	-1.97852	0.0478696	0.241086	FALSE	FALSE	FALSE	FALSE	inactive	0.617828
chr1	30934462	30934962	chr1	30461615	30462115	STARR_ID340	1438.15	-0.0291879	0.0847064	-0.344578	0.730412	0.890264	FALSE	FALSE	FALSE	FALSE	inactive	0.0504814
chr1	31296339	31297399	chr1	30823492	30824552	STARR_ID345	13755.9	-0.127111	0.119955	-1.05965	0.289302	0.626501	TRUE	TRUE	TRUE	TRUE	constitutive	0.203078
chr1	31643572	31644072	chr1	31170725	31171225	STARR_ID346	4066.08	-0.154292	0.154116	-1.00115	0.316757	0.65198	TRUE	TRUE	TRUE	TRUE	constitutive	0.185766
chr1	31659479	31659979	chr1	31186632	31187132	STARR_ID347	1064.48	0.972532	0.117706	8.26242	1.42752e-16	4.38028e-15	TRUE	TRUE	FALSE	TRUE	constitutive	14.3585
chr1	31669478	31669978	chr1	31196631	31197131	STARR_ID348	464.301	0.036172	0.145491	0.248621	0.803654	0.922198	FALSE	FALSE	FALSE	FALSE	inactive	0.0351759
chr1	31701801	31702527	chr1	31228954	31229680	STARR_ID349	1036.95	-0.0269844	0.137258	-0.196597	0.844143	0.938808	TRUE	TRUE	FALSE	FALSE	constitutive	0.0274231
chr1	31731428	31731928	chr1	31258581	31259081	STARR_ID350	190.694	0.218323	0.124356	1.75562	0.0791532	0.328653	FALSE	FALSE	FALSE	FALSE	inactive	0.483263
chr1	31841560	31842060	chr1	31368713	31369213	STARR_ID352	3093.37	1.00954	0.128339	7.86616	3.65683e-15	9.81031e-14	TRUE	TRUE	FALSE	TRUE	induced	13.0083
chr1	31944297	31944797	chr1	31471450	31471950	STARR_ID353	3345.4	-0.0956616	0.248553	-0.384874	0.700331	0.876034	TRUE	TRUE	TRUE	TRUE	constitutive	0.0574791
chr1	31976705	31977030	chr1	31511104	31511429	STARR_ID355	510.508	-0.0632032	0.106515	-0.593372	0.552932	0.807791	FALSE	FALSE	FALSE	FALSE	inactive	0.0927011
chr1	32166747	32167247	chr1	31701146	31701646	STARR_ID357	2513.25	-0.254092	0.201981	-1.258	0.208393	0.541731	TRUE	TRUE	TRUE	TRUE	constitutive	0.266216
chr1	32220891	32221391	chr1	31755290	31755790	STARR_ID358	3654.23	-0.150414	0.0855288	-1.75864	0.0786392	0.327259	FALSE	FALSE	FALSE	FALSE	inactive	0.485108
chr1	32235357	32235857	chr1	31769756	31770256	STARR_ID359	1670.16	-0.149236	0.0829393	-1.79933	0.0719658	0.310138	FALSE	FALSE	FALSE	FALSE	inactive	0.508444
chr1	3398708	3399208	chr1	3482144	3482644	STARR_ID36	4504.47	0.0816941	0.111734	0.731149	0.464688	0.756521	TRUE	TRUE	TRUE	TRUE	constitutive	0.121179
chr1	32296201	32296701	chr1	31830600	31831100	STARR_ID361	1418.5	0.209163	0.0768593	2.72137	0.00650111	0.0500237	TRUE	TRUE	FALSE	FALSE	constitutive	1.30082
chr1	32308401	32308929	chr1	31842800	31843328	STARR_ID363	588.983	0.58302	0.110208	5.29018	1.22199e-07	1.82583e-06	FALSE	TRUE	FALSE	FALSE	constitutive	5.73854
chr1	32345681	32346181	chr1	31880080	31880580	STARR_ID364	329.184	-0.0633118	0.122213	-0.518043	0.604429	0.831786	FALSE	FALSE	FALSE	FALSE	inactive	0.0799884
chr1	32376509	32377009	chr1	31910908	31911408	STARR_ID365	142.342	-0.226618	0.202669	-1.11817	0.263495	0.600433	TRUE	TRUE	FALSE	FALSE	constitutive	0.221536
chr1	32798326	32798826	chr1	32332725	32333225	STARR_ID366	490.387	1.26039	0.111287	11.3256	9.79974e-30	8.34086e-28	TRUE	TRUE	FALSE	TRUE	induced	27.0788
chr1	32872138	32872638	chr1	32406537	32407037	STARR_ID368	670.746	-0.023072	0.116922	-0.197329	0.84357	0.938808	FALSE	FALSE	FALSE	FALSE	inactive	0.0274231
chr1	33224936	33225436	chr1	32759335	32759835	STARR_ID372	1297.01	-0.204409	0.161702	-1.26411	0.206191	0.539984	TRUE	TRUE	TRUE	TRUE	constitutive	0.267619
chr1	33490712	33491212	chr1	33025111	33025611	STARR_ID377	190.982	-0.450487	0.131059	-3.43729	0.000587577	0.00580232	FALSE	FALSE	FALSE	FALSE	inactive	2.2364
chr1	33615422	33615922	chr1	33149821	33150321	STARR_ID379	595.782	-0.151852	0.108953	-1.39374	0.163396	0.479846	TRUE	FALSE	FALSE	FALSE	constitutive	0.318898
chr1	3459636	3460136	chr1	3543072	3543572	STARR_ID38	3535.24	-0.13002	0.0670345	-1.9396	0.0524282	0.25586	TRUE	TRUE	FALSE	FALSE	constitutive	0.591997
chr1	34125968	34126468	chr1	33660368	33660868	STARR_ID382	477.289	0.478461	0.0974084	4.91191	9.01939e-07	1.2377e-05	FALSE	FALSE	FALSE	FALSE	inactive	4.90738
chr1	35291201	35291701	chr1	34825600	34826100	STARR_ID384	1993.99	0.853968	0.128957	6.62213	3.54049e-11	6.86913e-10	TRUE	TRUE	TRUE	TRUE	constitutive	9.1631
chr1	35730522	35731022	chr1	35264921	35265421	STARR_ID386	354.134	-0.020412	0.146183	-0.139634	0.888949	0.958532	FALSE	FALSE	FALSE	FALSE	inactive	0.0183936
chr1	35971628	35972128	chr1	35506027	35506527	STARR_ID387	358.04	-0.245082	0.126513	-1.9372	0.0527209	0.256414	FALSE	FALSE	FALSE	FALSE	inactive	0.591059
chr1	36059207	36059707	chr1	35593606	35594106	STARR_ID388	486.749	0.0388508	0.0921995	0.421378	0.673479	0.864957	FALSE	FALSE	FALSE	FALSE	inactive	0.0630057
chr1	36669519	36670019	chr1	36203918	36204418	STARR_ID391	717.046	0.088303	0.109457	0.806737	0.419818	0.729989	FALSE	FALSE	FALSE	FALSE	inactive	0.136684
chr1	36734791	36735291	chr1	36269190	36269690	STARR_ID393	177.913	-0.206473	0.187462	-1.10141	0.270717	0.607759	FALSE	FALSE	FALSE	FALSE	inactive	0.216269
chr1	36874041	36874541	chr1	36408440	36408940	STARR_ID397	1446.26	-0.0193697	0.129302	-0.149802	0.88092	0.955192	TRUE	TRUE	TRUE	TRUE	constitutive	0.0199093
chr1	36902382	36902882	chr1	36436781	36437281	STARR_ID398	2993.07	-0.252029	0.161458	-1.56096	0.118534	0.411388	TRUE	TRUE	TRUE	TRUE	constitutive	0.385749
chr1	36952397	36952897	chr1	36486796	36487296	STARR_ID399	1373.21	-0.133527	0.0832782	-1.60338	0.108851	0.39176	FALSE	FALSE	FALSE	FALSE	inactive	0.40698
chr1	3585311	3585811	chr1	3668747	3669247	STARR_ID40	3394.21	-0.0131187	0.0719804	-0.182254	0.855384	0.944892	TRUE	TRUE	FALSE	FALSE	constitutive	0.0246178
chr1	37217082	37217582	chr1	36751481	36751981	STARR_ID400	556.113	0.0078069	0.105362	0.0740961	0.940934	0.978862	FALSE	FALSE	FALSE	FALSE	inactive	0.00927843
chr1	37504030	37504653	chr1	37038429	37039052	STARR_ID401	3125.25	1.0078	0.155317	6.48865	8.66098e-11	1.61887e-09	TRUE	TRUE	FALSE	TRUE	induced	8.79079
chr1	37927118	37927618	chr1	37461517	37462017	STARR_ID403	572.851	-0.173848	0.099267	-1.75132	0.0798906	0.330261	TRUE	FALSE	FALSE	FALSE	constitutive	0.481143
chr1	37960989	37961489	chr1	37495388	37495888	STARR_ID405	133.039	-0.364303	0.154092	-2.3642	0.0180693	0.116279	TRUE	TRUE	FALSE	FALSE	constitutive	0.934497
chr1	37963395	37963895	chr1	37497794	37498294	STARR_ID406	370.997	-0.000338641	0.131243	-0.00258026	0.997941	0.999813	FALSE	FALSE	FALSE	FALSE	inactive	8.12756e-05
chr1	38078473	38078973	chr1	37612801	37613301	STARR_ID408	2773.23	0.712618	0.077275	9.22184	2.92043e-20	1.17301e-18	TRUE	TRUE	FALSE	TRUE	constitutive	17.9307
chr1	38157636	38158503	chr1	37691964	37692831	STARR_ID412	10995.8	-0.10546	0.0972983	-1.08389	0.278415	0.617075	TRUE	TRUE	FALSE	FALSE	constitutive	0.209662
chr1	38887254	38887754	chr1	38421582	38422082	STARR_ID414	718.58	0.585509	0.130873	4.47386	7.68199e-06	9.66093e-05	FALSE	TRUE	FALSE	FALSE	constitutive	4.01498
chr1	39598710	39599210	chr1	39133038	39133538	STARR_ID416	650.594	-0.0404273	0.0981995	-0.411686	0.68057	0.868726	FALSE	FALSE	FALSE	FALSE	inactive	0.0611172
chr1	39608352	39608852	chr1	39142680	39143180	STARR_ID417	1527.96	0.0309424	0.125297	0.246952	0.804945	0.922346	TRUE	TRUE	TRUE	TRUE	constitutive	0.0351061
chr1	39720847	39721407	chr1	39255175	39255735	STARR_ID419	6429.07	0.868581	0.26492	3.27866	0.00104302	0.00981193	TRUE	TRUE	TRUE	TRUE	constitutive	2.00825
chr1	40496261	40496761	chr1	40030589	40031089	STARR_ID425	1327.57	-0.0244452	0.0792763	-0.308355	0.757812	0.902001	FALSE	FALSE	FALSE	FALSE	inactive	0.0447931
chr1	40606705	40607205	chr1	40141033	40141533	STARR_ID426	624.514	0.135186	0.108928	1.24106	0.214583	0.548013	FALSE	FALSE	FALSE	FALSE	inactive	0.261209
chr1	41269602	41270102	chr1	40803930	40804430	STARR_ID428	611.586	0.335973	0.10042	3.34568	0.000820823	0.00787186	FALSE	TRUE	FALSE	FALSE	constitutive	2.10392
chr1	41333968	41334468	chr1	40868296	40868796	STARR_ID429	280.619	-0.245991	0.144161	-1.70636	0.0879408	0.349559	FALSE	FALSE	FALSE	FALSE	inactive	0.456479
chr1	41365048	41365548	chr1	40899376	40899876	STARR_ID430	1863.35	-0.00912777	0.149254	-0.0611557	0.951235	0.983351	TRUE	TRUE	TRUE	TRUE	constitutive	0.0072914
chr1	41367547	41369250	chr1	40901875	40903578	STARR_ID431	1333.44	-0.0223159	0.0818139	-0.272765	0.785034	0.915031	TRUE	TRUE	FALSE	FALSE	constitutive	0.0385641
chr1	41384811	41386013	chr1	40919139	40920341	STARR_ID433	4264.85	-0.0108173	0.0934755	-0.115724	0.907872	0.964798	FALSE	FALSE	FALSE	FALSE	inactive	0.0155637
chr1	41388436	41390419	chr1	40922764	40924747	STARR_ID434	4963.46	0.331606	0.103015	3.21899	0.00128642	0.0119058	TRUE	TRUE	FALSE	FALSE	constitutive	1.92424
chr1	41915336	41915836	chr1	41449665	41450165	STARR_ID443	1241.1	-0.122838	0.10055	-1.22166	0.221837	0.556497	FALSE	FALSE	FALSE	FALSE	inactive	0.254537
chr1	41964222	41964722	chr1	41498551	41499051	STARR_ID447	2631.73	-0.0926062	0.0597265	-1.5505	0.121021	0.41678	TRUE	FALSE	FALSE	FALSE	constitutive	0.380093
chr1	41966147	41966647	chr1	41500476	41500976	STARR_ID448	1240.38	-0.159268	0.121674	-1.30897	0.190543	0.520952	TRUE	TRUE	FALSE	FALSE	constitutive	0.283202
chr1	41980763	41981263	chr1	41515092	41515592	STARR_ID449	767.171	-0.110859	0.0865941	-1.28021	0.200471	0.532142	FALSE	FALSE	FALSE	FALSE	inactive	0.273972
chr1	5490907	5491407	chr1	5430847	5431347	STARR_ID45	384.863	-0.299996	0.101578	-2.95337	0.00314326	0.0263147	TRUE	FALSE	FALSE	FALSE	constitutive	1.5798
chr1	42255274	42255876	chr1	41789603	41790205	STARR_ID453	1575.9	1.97887	0.154511	12.8074	1.49129e-37	2.66549e-35	FALSE	TRUE	FALSE	TRUE	induced	34.5742
chr1	42328365	42328865	chr1	41862694	41863194	STARR_ID455	955.376	-0.00328312	0.173703	-0.0189007	0.98492	0.995323	TRUE	TRUE	FALSE	FALSE	constitutive	0.00203596
chr1	42331897	42332397	chr1	41866226	41866726	STARR_ID456	850.833	0.200586	0.0908985	2.20671	0.0273344	0.16131	FALSE	TRUE	FALSE	FALSE	constitutive	0.792338
chr1	42333833	42334333	chr1	41868162	41868662	STARR_ID457	385.037	0.628611	0.140157	4.48504	7.28994e-06	9.20025e-05	FALSE	TRUE	FALSE	FALSE	constitutive	4.0362
chr1	42631384	42631884	chr1	42165713	42166213	STARR_ID458	1461.07	0.00692648	0.111219	0.0622777	0.950342	0.982766	FALSE	FALSE	FALSE	FALSE	inactive	0.00755008
chr1	42805701	42806201	chr1	42340030	42340530	STARR_ID459	2608.7	-0.419011	0.153591	-2.7281	0.00637008	0.0491824	TRUE	TRUE	TRUE	TRUE	constitutive	1.30819
chr1	5658097	5658597	chr1	5598037	5598537	STARR_ID46	365.034	-0.017009	0.112059	-0.151786	0.879355	0.954376	FALSE	FALSE	FALSE	FALSE	inactive	0.0202805
chr1	43403397	43405191	chr1	42937726	42939520	STARR_ID463	1845.17	0.196265	0.140838	1.39356	0.163451	0.479846	TRUE	TRUE	TRUE	TRUE	constitutive	0.318898
chr1	43408871	43409371	chr1	42943200	42943700	STARR_ID464	880.048	-0.0475277	0.0940802	-0.505183	0.613431	0.835811	FALSE	FALSE	FALSE	FALSE	inactive	0.077892
chr1	43438812	43439475	chr1	42973141	42973804	STARR_ID465	2689.49	0.522666	0.133191	3.92419	8.70206e-05	0.00097977	TRUE	TRUE	FALSE	FALSE	constitutive	3.00888
chr1	43457985	43459727	chr1	42992314	42994056	STARR_ID468	1307.26	0.735076	0.0698795	10.5192	7.04767e-26	4.30661e-24	FALSE	TRUE	FALSE	FALSE	constitutive	23.3659
chr1	43701311	43701811	chr1	43235640	43236140	STARR_ID471	1703.47	-0.0271618	0.0785826	-0.345646	0.729608	0.890008	TRUE	TRUE	FALSE	FALSE	constitutive	0.0506062
chr1	43861844	43862344	chr1	43396173	43396673	STARR_ID473	104.904	-0.150612	0.198782	-0.757677	0.448645	0.745603	FALSE	FALSE	FALSE	FALSE	inactive	0.127492
chr1	44002007	44003686	chr1	43536336	43538015	STARR_ID475	2550.75	-0.165461	0.13206	-1.25292	0.210234	0.543677	FALSE	FALSE	FALSE	FALSE	inactive	0.264659
chr1	44015760	44016260	chr1	43550089	43550589	STARR_ID477	14324.2	-0.163719	0.148479	-1.10264	0.270185	0.607258	TRUE	TRUE	TRUE	TRUE	constitutive	0.216626
chr1	6158190	6158511	chr1	6098130	6098451	STARR_ID48	472.313	0.561596	0.107456	5.22629	1.72943e-07	2.54676e-06	TRUE	TRUE	FALSE	FALSE	constitutive	5.59401
chr1	44296424	44296924	chr1	43830752	43831252	STARR_ID480	769.595	1.67433	0.174049	9.61986	6.59189e-22	3.01142e-20	TRUE	TRUE	TRUE	TRUE	induced	19.5212
chr1	44323991	44324491	chr1	43858319	43858819	STARR_ID481	459.459	-0.0466903	0.101717	-0.459022	0.646218	0.851795	FALSE	FALSE	FALSE	FALSE	inactive	0.0696649
chr1	44533222	44533722	chr1	44067550	44068050	STARR_ID483	2937.61	2.43915	0.185521	13.1476	1.75774e-39	3.80817e-37	TRUE	TRUE	FALSE	TRUE	induced	36.4193
chr1	45094772	45095272	chr1	44629100	44629600	STARR_ID487	594.406	-0.106737	0.127441	-0.837542	0.402288	0.719344	TRUE	TRUE	FALSE	FALSE	constitutive	0.143063
chr1	45108511	45109011	chr1	44642839	44643339	STARR_ID488	1078.06	0.0353738	0.0793099	0.44602	0.655583	0.856324	FALSE	FALSE	FALSE	FALSE	inactive	0.0673619
chr1	45205220	45205599	chr1	44739548	44739927	STARR_ID489	1105.97	-0.0180955	0.0826756	-0.218873	0.826749	0.93201	TRUE	TRUE	FALSE	FALSE	constitutive	0.0305796
chr1	6217885	6218385	chr1	6157825	6158325	STARR_ID49	3154.31	0.0552246	0.0855179	0.645767	0.51843	0.789713	TRUE	TRUE	TRUE	TRUE	constitutive	0.102531
chr1	45275797	45276297	chr1	44810125	44810625	STARR_ID490	1384.17	-0.0832367	0.0729317	-1.1413	0.253747	0.590356	TRUE	FALSE	FALSE	FALSE	constitutive	0.228886
chr1	45285293	45285793	chr1	44819621	44820121	STARR_ID491	543.441	-0.0620005	0.115281	-0.537822	0.5907	0.824464	TRUE	FALSE	FALSE	FALSE	constitutive	0.0838285
chr1	45770212	45770783	chr1	45304540	45305111	STARR_ID492	1528.89	0.177126	0.103617	1.70943	0.0873716	0.348293	FALSE	TRUE	FALSE	FALSE	constitutive	0.458056
chr1	45965506	45966237	chr1	45499834	45500565	STARR_ID494	2820.36	0.00316832	0.139964	0.0226366	0.98194	0.994881	TRUE	TRUE	FALSE	FALSE	constitutive	0.00222865
chr1	45982535	45983035	chr1	45516863	45517363	STARR_ID495	450.216	0.129802	0.10111	1.28377	0.199222	0.53038	FALSE	FALSE	FALSE	FALSE	inactive	0.275413
chr1	45984928	45985428	chr1	45519256	45519756	STARR_ID496	508.963	0.111793	0.0938573	1.1911	0.233615	0.568977	FALSE	TRUE	FALSE	FALSE	constitutive	0.244905
chr1	46337715	46338215	chr1	45872043	45872543	STARR_ID498	523.108	-0.111995	0.146999	-0.761875	0.446134	0.744534	TRUE	TRUE	TRUE	TRUE	constitutive	0.128115
chr1	6293118	6293618	chr1	6233058	6233558	STARR_ID50	555.744	0.380803	0.113155	3.36534	0.000764502	0.00738623	TRUE	TRUE	FALSE	TRUE	constitutive	2.13158
chr1	46600659	46601159	chr1	46134987	46135487	STARR_ID500	135.598	0.108523	0.172673	0.628487	0.529685	0.795142	FALSE	FALSE	FALSE	FALSE	inactive	0.0995554
chr1	46637343	46637843	chr1	46171671	46172171	STARR_ID501	2576.48	-0.132445	0.164709	-0.804115	0.421331	0.730501	TRUE	TRUE	TRUE	TRUE	constitutive	0.136379
chr1	46648836	46649336	chr1	46183164	46183664	STARR_ID502	1342.3	-0.0936499	0.133789	-0.69998	0.48394	0.767849	TRUE	TRUE	FALSE	FALSE	constitutive	0.114724
chr1	47108928	47109494	chr1	46643256	46643822	STARR_ID504	534.821	0.01723	0.102625	0.167893	0.866667	0.951096	FALSE	FALSE	FALSE	FALSE	inactive	0.0217757
chr1	47223222	47223722	chr1	46757550	46758050	STARR_ID506	861.154	-0.0669429	0.146323	-0.4575	0.647312	0.852529	FALSE	FALSE	FALSE	FALSE	inactive	0.0692906
chr1	47496622	47497131	chr1	47030950	47031459	STARR_ID509	312.978	0.21661	0.105369	2.05574	0.039808	0.212077	FALSE	FALSE	FALSE	FALSE	inactive	0.673506
chr1	47943597	47944097	chr1	47477925	47478425	STARR_ID511	4254.75	-0.306083	0.0938822	-3.26028	0.001113	0.0104155	TRUE	TRUE	TRUE	TRUE	constitutive	1.98232
chr1	48360330	48361097	chr1	47894658	47895425	STARR_ID513	5974.53	1.21093	0.147248	8.22373	1.97276e-16	5.96373e-15	TRUE	TRUE	TRUE	TRUE	induced	14.2245
chr1	48386632	48387132	chr1	47920960	47921460	STARR_ID515	1630.26	1.81049	0.191288	9.46471	2.94389e-21	1.27947e-19	TRUE	TRUE	FALSE	TRUE	induced	18.893
chr1	49147034	49147534	chr1	48681362	48681862	STARR_ID518	513.463	0.206826	0.0869329	2.37915	0.0173527	0.1133	TRUE	TRUE	FALSE	FALSE	constitutive	0.945771
chr1	51763218	51763718	chr1	51297546	51298046	STARR_ID520	3367.41	-0.0940279	0.130029	-0.723131	0.469599	0.759507	FALSE	FALSE	FALSE	FALSE	inactive	0.119468
chr1	51772558	51773100	chr1	51306886	51307428	STARR_ID521	1171.8	0.768565	0.10083	7.62241	2.48978e-14	6.24586e-13	FALSE	TRUE	FALSE	FALSE	constitutive	12.2044
chr1	51787084	51787584	chr1	51321412	51321912	STARR_ID522	2698.17	0.630905	0.121741	5.18236	2.19095e-07	3.18054e-06	TRUE	TRUE	FALSE	FALSE	constitutive	5.4975
chr1	51789876	51790305	chr1	51324204	51324633	STARR_ID523	487.327	0.00590687	0.150115	0.039349	0.968612	0.989582	TRUE	TRUE	FALSE	FALSE	constitutive	0.00454836
chr1	51795042	51795542	chr1	51329370	51329870	STARR_ID524	1279.17	-0.0544019	0.0684982	-0.794209	0.427074	0.733893	FALSE	FALSE	FALSE	FALSE	inactive	0.134367
chr1	52033081	52033864	chr1	51567409	51568192	STARR_ID525	604.938	-0.0834872	0.0874859	-0.954293	0.339935	0.671683	FALSE	FALSE	FALSE	FALSE	inactive	0.172836
chr1	53163559	53163933	chr1	52697887	52698261	STARR_ID527	5286.59	0.219164	0.144296	1.51885	0.1288	0.430771	TRUE	TRUE	FALSE	TRUE	constitutive	0.365754
chr1	53513804	53514304	chr1	53048132	53048632	STARR_ID528	523.032	-0.0165538	0.0856434	-0.193287	0.846734	0.939688	FALSE	FALSE	FALSE	FALSE	inactive	0.0270163
chr1	53573178	53573678	chr1	53107506	53108006	STARR_ID529	709.53	-0.237361	0.0814529	-2.91408	0.00356735	0.0295879	TRUE	TRUE	FALSE	FALSE	constitutive	1.52889
chr1	53648855	53649376	chr1	53183183	53183704	STARR_ID531	1392.2	-0.0544647	0.0925835	-0.588276	0.556347	0.809464	FALSE	FALSE	FALSE	FALSE	inactive	0.0918025
chr1	53991425	53991912	chr1	53525752	53526239	STARR_ID535	1792.46	0.205532	0.0832134	2.46994	0.0135137	0.0922794	TRUE	TRUE	FALSE	FALSE	constitutive	1.0349
chr1	54303548	54304535	chr1	53837875	53838862	STARR_ID536	14675.9	-0.0476518	0.0923139	-0.516193	0.605719	0.832566	TRUE	TRUE	FALSE	FALSE	constitutive	0.0795814
chr1	54481821	54482321	chr1	54016148	54016648	STARR_ID537	1876.38	-0.283234	0.0936325	-3.02496	0.0024867	0.0213814	TRUE	TRUE	TRUE	TRUE	constitutive	1.66996
chr1	54518819	54519184	chr1	54053146	54053511	STARR_ID538	7634.02	-0.0551041	0.104573	-0.526945	0.598232	0.829057	TRUE	TRUE	TRUE	TRUE	constitutive	0.0814157
chr1	54602932	54603432	chr1	54137259	54137759	STARR_ID539	783.67	0.0531722	0.103113	0.515671	0.606084	0.832587	FALSE	FALSE	FALSE	FALSE	inactive	0.0795702
chr1	6543118	6543618	chr1	6483058	6483558	STARR_ID54	917.674	0.459945	0.0691683	6.64965	2.93785e-11	5.73101e-10	TRUE	TRUE	FALSE	FALSE	constitutive	9.24177
chr1	54738442	54739587	chr1	54272769	54273914	STARR_ID540	3643.68	0.0946748	0.114085	0.829859	0.406619	0.72197	TRUE	TRUE	FALSE	FALSE	constitutive	0.141481
chr1	55773072	55773572	chr1	55307399	55307899	STARR_ID546	293.988	0.464718	0.135353	3.43339	0.000596087	0.0058823	TRUE	TRUE	FALSE	TRUE	constitutive	2.23045
chr1	56100112	56100612	chr1	55634439	55634939	STARR_ID549	1378.04	-0.110846	0.0911291	-1.21637	0.223846	0.558793	FALSE	FALSE	FALSE	FALSE	inactive	0.252749
chr1	56164887	56165203	chr1	55699214	55699530	STARR_ID550	84.8608	-0.0644681	0.162308	-0.397195	0.691224	0.872321	FALSE	FALSE	FALSE	FALSE	inactive	0.0593239
chr1	57013497	57014107	chr1	56547825	56548435	STARR_ID553	206.501	-0.00232369	0.117356	-0.0198003	0.984203	0.995323	FALSE	FALSE	FALSE	FALSE	inactive	0.00203596
chr1	57020793	57021614	chr1	56555120	56555941	STARR_ID554	1777.88	0.290367	0.17148	1.6933	0.0903976	0.355597	FALSE	FALSE	FALSE	FALSE	inactive	0.449042
chr1	57035297	57035797	chr1	56569624	56570124	STARR_ID555	523.478	-0.191136	0.117826	-1.62218	0.104765	0.384998	FALSE	FALSE	FALSE	FALSE	inactive	0.414541
chr1	57253940	57254440	chr1	56788267	56788767	STARR_ID556	366.29	0.00146677	0.153446	0.0095589	0.992373	0.998285	FALSE	FALSE	FALSE	FALSE	inactive	0.000745564
chr1	6671691	6674116	chr1	6611631	6614056	STARR_ID56	9872.62	-0.0396677	0.159231	-0.24912	0.803268	0.922194	TRUE	TRUE	FALSE	FALSE	constitutive	0.0351776
chr1	58290136	58290636	chr1	57824464	57824964	STARR_ID560	549.986	-0.0817035	0.130073	-0.628136	0.529915	0.795142	TRUE	TRUE	FALSE	FALSE	constitutive	0.0995554
chr1	59058094	59058635	chr1	58592422	58592963	STARR_ID564	6799.47	0.158294	0.115177	1.37436	0.16933	0.488924	TRUE	TRUE	FALSE	FALSE	constitutive	0.310759
chr1	59085911	59086411	chr1	58620239	58620739	STARR_ID565	610.664	-0.315655	0.132727	-2.37824	0.0173957	0.113425	TRUE	FALSE	FALSE	FALSE	constitutive	0.94529
chr1	6682773	6683013	chr1	6622713	6622953	STARR_ID57	87.5992	-0.174904	0.231386	-0.755895	0.449712	0.746596	TRUE	FALSE	FALSE	FALSE	constitutive	0.126914
chr1	59521390	59522379	chr1	59055718	59056707	STARR_ID572	612.419	0.00640529	0.0956976	0.0669327	0.946635	0.981078	FALSE	FALSE	FALSE	FALSE	inactive	0.0082963
chr1	60322447	60322947	chr1	59856775	59857275	STARR_ID577	428.452	-0.0163329	0.14919	-0.109477	0.912824	0.966454	TRUE	TRUE	FALSE	FALSE	constitutive	0.0148186
chr1	61608539	61609060	chr1	61142867	61143388	STARR_ID580	1201.03	0.290396	0.0737011	3.94019	8.14169e-05	0.000919573	TRUE	TRUE	TRUE	TRUE	constitutive	3.03641
chr1	61681294	61681794	chr1	61215622	61216122	STARR_ID582	5167.29	1.54853	0.171187	9.04588	1.48469e-19	5.64616e-18	TRUE	TRUE	TRUE	TRUE	induced	17.2482
chr1	61767335	61767835	chr1	61301663	61302163	STARR_ID584	125.885	-0.191085	0.145509	-1.31322	0.189109	0.518843	FALSE	FALSE	FALSE	FALSE	inactive	0.284964
chr1	61869685	61870185	chr1	61404013	61404513	STARR_ID586	269.606	-0.00358804	0.134511	-0.0266746	0.978719	0.99346	FALSE	FALSE	FALSE	FALSE	inactive	0.00284944
chr1	62005729	62006229	chr1	61540057	61540557	STARR_ID589	450.514	-0.160915	0.0885637	-1.81694	0.0692262	0.3041	FALSE	FALSE	FALSE	FALSE	inactive	0.516984
chr1	7019508	7020017	chr1	6959448	6959957	STARR_ID59	1808.37	0.343889	0.0782499	4.39475	1.10901e-05	0.000138133	FALSE	TRUE	FALSE	FALSE	constitutive	3.8597
chr1	62108133	62108633	chr1	61642461	61642961	STARR_ID590	327.679	-0.0628221	0.114745	-0.547494	0.58404	0.821805	FALSE	FALSE	FALSE	FALSE	inactive	0.0852312
chr1	63696966	63697466	chr1	63231295	63231795	STARR_ID593	112.357	-0.145369	0.145431	-0.999573	0.317517	0.652462	FALSE	FALSE	FALSE	FALSE	inactive	0.185445
chr1	64446475	64447324	chr1	63980803	63981652	STARR_ID595	1430.33	-0.0603109	0.185877	-0.324467	0.745584	0.897022	FALSE	FALSE	FALSE	FALSE	inactive	0.0471968
chr1	64809246	64809746	chr1	64343563	64344063	STARR_ID596	449.606	-0.241189	0.22856	-1.05526	0.291308	0.628371	TRUE	TRUE	TRUE	TRUE	constitutive	0.201784
chr1	65363946	65364446	chr1	64898263	64898763	STARR_ID599	936.495	-0.0999077	0.246038	-0.406067	0.684694	0.870493	TRUE	TRUE	FALSE	FALSE	constitutive	0.0602348
chr1	1007900	1009922	chr1	1072520	1074542	STARR_ID6	182603	1.53087	0.19345	7.91353	2.50183e-15	6.81403e-14	TRUE	TRUE	TRUE	TRUE	induced	13.1666
chr1	65448768	65449268	chr1	64983085	64983585	STARR_ID601	1089.39	0.445317	0.0968795	4.5966	4.29436e-06	5.53199e-05	TRUE	TRUE	TRUE	TRUE	constitutive	4.25712
chr1	65452994	65453494	chr1	64987311	64987811	STARR_ID602	687.433	-0.0860435	0.0859368	-1.00124	0.31671	0.651978	FALSE	FALSE	FALSE	FALSE	inactive	0.185767
chr1	65510022	65510522	chr1	65044339	65044839	STARR_ID603	651.64	0.308091	0.102367	3.00967	0.00261531	0.0223262	FALSE	TRUE	FALSE	FALSE	constitutive	1.65119
chr1	68074638	68075197	chr1	67608955	67609514	STARR_ID611	4240.88	1.281	0.134035	9.55718	1.2101e-21	5.39042e-20	TRUE	TRUE	FALSE	TRUE	induced	19.2684
chr1	68084226	68084817	chr1	67618543	67619134	STARR_ID612	386.04	-0.116716	0.106384	-1.09712	0.272589	0.610199	TRUE	TRUE	FALSE	FALSE	constitutive	0.214528
chr1	68306135	68306635	chr1	67840452	67840952	STARR_ID614	680.741	0.063573	0.22498	0.282572	0.777505	0.910604	TRUE	TRUE	TRUE	TRUE	constitutive	0.0406702
chr1	71381029	71381529	chr1	70915346	70915846	STARR_ID617	114.614	0.19323	0.20211	0.956066	0.339039	0.670894	FALSE	FALSE	FALSE	FALSE	inactive	0.173346
chr1	71914265	71914785	chr1	71448582	71449102	STARR_ID619	824.768	2.17455	0.234229	9.28388	1.63417e-20	6.65795e-19	TRUE	TRUE	FALSE	TRUE	induced	18.1767
chr1	75118193	75118744	chr1	74652509	74653060	STARR_ID621	7609.94	1.39401	0.10713	13.0123	1.04124e-38	2.03954e-36	TRUE	TRUE	FALSE	TRUE	induced	35.6905
chr1	75168924	75169503	chr1	74703240	74703819	STARR_ID622	844.577	1.78792	0.160096	11.1678	5.85919e-29	4.57817e-27	TRUE	TRUE	FALSE	TRUE	induced	26.3393
chr1	76643910	76644410	chr1	76178225	76178725	STARR_ID624	261.793	-0.244358	0.129567	-1.88597	0.0592997	0.277917	FALSE	FALSE	FALSE	FALSE	inactive	0.556084
chr1	77409803	77411133	chr1	76944118	76945448	STARR_ID626	603.281	0.00388046	0.120555	0.0321884	0.974322	0.991954	TRUE	TRUE	TRUE	TRUE	constitutive	0.0035085
chr1	79756746	79757246	chr1	79291061	79291561	STARR_ID631	346.269	-0.0413191	0.122288	-0.337883	0.735452	0.892262	FALSE	FALSE	FALSE	FALSE	inactive	0.0495075
chr1	81473953	81474305	chr1	81008268	81008620	STARR_ID632	66.8209	-0.221719	0.240818	-0.920692	0.357211	0.684595	TRUE	FALSE	FALSE	FALSE	constitutive	0.164566
chr1	85069722	85070222	chr1	84604039	84604539	STARR_ID638	406.165	0.192679	0.109284	1.76311	0.0778823	0.325721	TRUE	TRUE	FALSE	FALSE	constitutive	0.487155
chr1	85224727	85225873	chr1	84759044	84760190	STARR_ID639	1510.7	0.273493	0.085377	3.20336	0.00135834	0.0124826	FALSE	TRUE	FALSE	FALSE	constitutive	1.9037
chr1	7386367	7386733	chr1	7326307	7326673	STARR_ID64	572.102	-0.108882	0.236054	-0.461258	0.644614	0.851093	TRUE	TRUE	FALSE	FALSE	constitutive	0.0700232
chr1	85312070	85313496	chr1	84846387	84847813	STARR_ID643	1051.2	-0.091249	0.103202	-0.88418	0.376599	0.701156	FALSE	FALSE	FALSE	FALSE	inactive	0.154185
chr1	85763529	85764079	chr1	85297846	85298396	STARR_ID645	7997.62	0.363208	0.223075	1.62819	0.103485	0.382731	TRUE	TRUE	TRUE	TRUE	constitutive	0.417106
chr1	85961164	85961619	chr1	85495481	85495936	STARR_ID649	552.516	0.319551	0.120568	2.65039	0.0080399	0.0598451	TRUE	TRUE	FALSE	TRUE	constitutive	1.22297
chr1	7395417	7395917	chr1	7335357	7335857	STARR_ID65	556.615	-0.124454	0.098302	-1.26604	0.2055	0.539426	TRUE	TRUE	FALSE	FALSE	constitutive	0.268068
chr1	86016538	86017221	chr1	85550855	85551538	STARR_ID650	1054.49	0.349779	0.176009	1.98727	0.0468919	0.237944	FALSE	TRUE	FALSE	FALSE	constitutive	0.623524
chr1	86296291	86296791	chr1	85830608	85831108	STARR_ID651	505.147	0.400066	0.154659	2.58676	0.00968843	0.0704295	TRUE	TRUE	TRUE	TRUE	constitutive	1.15225
chr1	87258629	87259129	chr1	86792946	86793446	STARR_ID652	302.128	-0.185158	0.105941	-1.74775	0.0805077	0.331943	TRUE	TRUE	FALSE	FALSE	constitutive	0.478936
chr1	87666791	87667218	chr1	87201108	87201535	STARR_ID653	281.426	-0.0216641	0.132851	-0.163071	0.870463	0.951621	FALSE	FALSE	FALSE	FALSE	inactive	0.021536
chr1	88759321	88759821	chr1	88293638	88294138	STARR_ID655	1009.55	1.27052	0.170563	7.44902	9.40396e-14	2.24486e-12	TRUE	TRUE	FALSE	TRUE	induced	11.6488
chr1	88974995	88975358	chr1	88509312	88509675	STARR_ID656	300.79	1.46846	0.16162	9.08585	1.02887e-19	3.9548e-18	TRUE	TRUE	FALSE	TRUE	induced	17.4029
chr1	7507729	7508354	chr1	7447669	7448294	STARR_ID66	13216.2	2.46318	0.193963	12.6992	5.97205e-37	1.0166e-34	TRUE	TRUE	TRUE	TRUE	induced	33.9929
chr1	90355593	90356093	chr1	89890034	89890534	STARR_ID660	1214.28	-0.242923	0.188033	-1.29191	0.196387	0.527049	TRUE	TRUE	TRUE	TRUE	constitutive	0.278149
chr1	91491846	91492350	chr1	91026289	91026793	STARR_ID661	526.139	-0.284387	0.115647	-2.4591	0.0139285	0.0944348	TRUE	TRUE	FALSE	FALSE	constitutive	1.02487
chr1	91564211	91566174	chr1	91098654	91100617	STARR_ID663	2447.27	0.596982	0.179574	3.32443	0.00088599	0.00845149	TRUE	TRUE	FALSE	TRUE	constitutive	2.07307
chr1	92215485	92215985	chr1	91749928	91750428	STARR_ID668	239.706	-0.184453	0.152171	-1.21214	0.225459	0.560278	FALSE	FALSE	FALSE	FALSE	inactive	0.251596
chr1	92234291	92234877	chr1	91768734	91769320	STARR_ID669	2541.06	0.485564	0.147537	3.29114	0.000997821	0.00942394	FALSE	TRUE	FALSE	FALSE	constitutive	2.02577
chr1	93459466	93459966	chr1	92993909	92994409	STARR_ID671	298.72	0.0465938	0.199504	0.233548	0.815336	0.926347	FALSE	FALSE	FALSE	FALSE	inactive	0.0332265
chr1	93865369	93865818	chr1	93399812	93400261	STARR_ID673	171.753	-0.178856	0.141426	-1.26466	0.205991	0.53976	TRUE	TRUE	FALSE	FALSE	constitutive	0.267799
chr1	94050615	94051115	chr1	93585058	93585558	STARR_ID674	663.728	-0.0892605	0.0845964	-1.05513	0.291365	0.628371	TRUE	TRUE	FALSE	FALSE	constitutive	0.201784
chr1	94079910	94080472	chr1	93614353	93614915	STARR_ID676	952.042	-0.0997571	0.0761705	-1.30965	0.190313	0.520586	FALSE	FALSE	FALSE	FALSE	inactive	0.283507
chr1	94245222	94245722	chr1	93779666	93780166	STARR_ID678	24262.6	0.266254	0.149496	1.78101	0.0749103	0.317	TRUE	TRUE	TRUE	TRUE	constitutive	0.498941
chr1	94312776	94313276	chr1	93847220	93847720	STARR_ID679	2997.77	-0.0172281	0.093902	-0.183469	0.85443	0.94453	TRUE	FALSE	FALSE	FALSE	constitutive	0.0247842
chr1	94533400	94534921	chr1	94067844	94069365	STARR_ID681	2499.95	-0.0910203	0.164317	-0.553932	0.579625	0.820022	TRUE	TRUE	TRUE	TRUE	constitutive	0.0861747
chr1	94715772	94716272	chr1	94250216	94250716	STARR_ID683	581.721	-0.0840469	0.102696	-0.818403	0.413127	0.727013	TRUE	TRUE	FALSE	FALSE	constitutive	0.138458
chr1	94911175	94911691	chr1	94445619	94446135	STARR_ID684	28.3955	0.0404729	0.26919	0.150351	0.880488	0.95517	TRUE	TRUE	FALSE	FALSE	constitutive	0.0199193
chr1	96155284	96155784	chr1	95689728	95690228	STARR_ID691	583.876	0.352281	0.105933	3.32551	0.000882566	0.00842444	FALSE	TRUE	FALSE	FALSE	constitutive	2.07446
chr1	96525201	96525701	chr1	96059645	96060145	STARR_ID694	98.2674	-0.119742	0.184489	-0.649047	0.516308	0.788389	FALSE	FALSE	FALSE	FALSE	inactive	0.103259
chr1	1014792	1015292	chr1	1079412	1079912	STARR_ID7	6357.59	-0.0411723	0.0946831	-0.434843	0.663676	0.861143	TRUE	TRUE	TRUE	TRUE	constitutive	0.0649247
chr1	100431344	100431844	chr1	99965788	99966288	STARR_ID700	68.4128	-0.487957	0.257831	-1.89255	0.0584181	0.274957	FALSE	FALSE	FALSE	FALSE	inactive	0.560735
chr1	100895853	100896353	chr1	100430297	100430797	STARR_ID705	188.552	0.107401	0.204653	0.524797	0.599724	0.82991	TRUE	TRUE	TRUE	TRUE	constitutive	0.080969
chr1	100918276	100918776	chr1	100452720	100453220	STARR_ID706	58.166	-0.17567	0.333549	-0.526669	0.598424	0.829088	TRUE	TRUE	TRUE	TRUE	constitutive	0.0813993
chr1	100951418	100951918	chr1	100485862	100486362	STARR_ID707	131.398	0.120212	0.149667	0.803196	0.421862	0.730644	TRUE	TRUE	FALSE	FALSE	constitutive	0.136294
chr1	101448283	101448783	chr1	100982727	100983227	STARR_ID708	377.921	-0.201068	0.108365	-1.85546	0.0635299	0.289112	FALSE	FALSE	FALSE	FALSE	inactive	0.538934
chr1	108225590	108226331	chr1	107682968	107683709	STARR_ID710	266.876	-0.164968	0.147379	-1.11934	0.262994	0.599959	FALSE	FALSE	FALSE	FALSE	inactive	0.221878
chr1	108281346	108282590	chr1	107738724	107739968	STARR_ID711	337.945	-0.0679412	0.131987	-0.514757	0.606723	0.832964	FALSE	FALSE	FALSE	FALSE	inactive	0.0793739
chr1	108479221	108479721	chr1	107936599	107937099	STARR_ID713	256.309	-0.0542596	0.153431	-0.353642	0.723607	0.887346	FALSE	FALSE	FALSE	FALSE	inactive	0.0519072
chr1	108741773	108742273	chr1	108199151	108199651	STARR_ID716	1762.75	0.783279	0.11859	6.60491	3.97765e-11	7.67563e-10	TRUE	TRUE	FALSE	TRUE	constitutive	9.11489
chr1	109373086	109373586	chr1	108830464	108830964	STARR_ID717	1744.93	-0.245854	0.0762957	-3.22238	0.00127131	0.0117736	TRUE	TRUE	TRUE	TRUE	constitutive	1.92909
chr1	109723822	109724979	chr1	109181200	109182357	STARR_ID721	291.488	-0.033679	0.102094	-0.329883	0.741489	0.895013	FALSE	FALSE	FALSE	FALSE	inactive	0.0481709
chr1	109741760	109742260	chr1	109199138	109199638	STARR_ID722	1180.99	0.831803	0.103548	8.033	9.51201e-16	2.69866e-14	FALSE	TRUE	FALSE	FALSE	constitutive	13.5689
chr1	109788803	109789303	chr1	109246181	109246681	STARR_ID724	1264	0.742764	0.108531	6.84379	7.71262e-12	1.5983e-10	FALSE	TRUE	FALSE	FALSE	constitutive	9.79634
chr1	109817217	109817717	chr1	109274595	109275095	STARR_ID725	2112.95	-0.122091	0.11573	-1.05497	0.291441	0.628371	TRUE	TRUE	TRUE	TRUE	constitutive	0.201784
chr1	110325996	110326496	chr1	109783374	109783874	STARR_ID728	664.745	0.0792938	0.114491	0.692577	0.488575	0.771182	FALSE	FALSE	FALSE	FALSE	inactive	0.112843
chr1	110370711	110371211	chr1	109828089	109828589	STARR_ID731	458.972	-0.0778072	0.112136	-0.693866	0.487766	0.770793	FALSE	FALSE	FALSE	FALSE	inactive	0.113062
chr1	110421818	110422170	chr1	109879196	109879548	STARR_ID733	600.582	0.872439	0.215414	4.05005	5.12065e-05	0.000591439	FALSE	TRUE	FALSE	FALSE	constitutive	3.22809
chr1	110546311	110547070	chr1	110003689	110004448	STARR_ID734	1537.7	-0.0494013	0.192193	-0.257041	0.797147	0.919301	FALSE	FALSE	FALSE	FALSE	inactive	0.0365424
chr1	110548332	110549703	chr1	110005710	110007081	STARR_ID735	627.112	0.0147578	0.123249	0.11974	0.904689	0.964317	FALSE	FALSE	FALSE	FALSE	inactive	0.0157803
chr1	110659523	110659785	chr1	110116901	110117163	STARR_ID736	174.362	-0.0231919	0.141098	-0.164367	0.869442	0.951621	FALSE	FALSE	FALSE	FALSE	inactive	0.021536
chr1	110662416	110662916	chr1	110119794	110120294	STARR_ID737	2469.59	0.121926	0.084085	1.45004	0.147048	0.458391	FALSE	FALSE	FALSE	FALSE	inactive	0.338764
chr1	110880752	110882535	chr1	110338130	110339913	STARR_ID739	36965.6	-0.032738	0.124168	-0.263658	0.792043	0.917614	TRUE	TRUE	TRUE	TRUE	constitutive	0.0373401
chr1	8229961	8230461	chr1	8169901	8170401	STARR_ID74	936.924	-0.102477	0.101744	-1.00721	0.313835	0.649659	FALSE	FALSE	FALSE	FALSE	inactive	0.187315
chr1	111587907	111588407	chr1	111045285	111045785	STARR_ID740	292.187	-0.117209	0.111667	-1.04963	0.293887	0.631164	FALSE	FALSE	FALSE	FALSE	inactive	0.199857
chr1	111641822	111642322	chr1	111099200	111099700	STARR_ID741	105.284	0.464134	0.198141	2.34244	0.0191579	0.121913	FALSE	FALSE	FALSE	FALSE	inactive	0.91395
chr1	111746697	111747197	chr1	111204075	111204575	STARR_ID742	5025.32	-0.0700016	0.128986	-0.542705	0.587333	0.823004	TRUE	TRUE	FALSE	FALSE	constitutive	0.0845979
chr1	112519271	112519771	chr1	111976649	111977149	STARR_ID744	1028.95	-0.12491	0.0853213	-1.464	0.143195	0.452597	TRUE	FALSE	FALSE	FALSE	constitutive	0.344289
chr1	112521317	112521817	chr1	111978695	111979195	STARR_ID745	409.666	0.751969	0.163042	4.61213	3.98567e-06	5.16692e-05	FALSE	TRUE	FALSE	FALSE	constitutive	4.28677
chr1	113007001	113007501	chr1	112464379	112464879	STARR_ID748	1797.57	-0.0628344	0.0955109	-0.657877	0.510617	0.785551	FALSE	FALSE	FALSE	FALSE	inactive	0.104826
chr1	8262530	8263030	chr1	8202470	8202970	STARR_ID75	382.299	0.184709	0.0987707	1.87008	0.0614734	0.283368	FALSE	FALSE	FALSE	FALSE	inactive	0.547649
chr1	113137147	113137449	chr1	112594525	112594827	STARR_ID750	175.081	-0.290345	0.17189	-1.68913	0.0911936	0.357214	TRUE	TRUE	TRUE	TRUE	constitutive	0.447072
chr1	113247567	113248067	chr1	112704945	112705445	STARR_ID751	948.814	-0.0404386	0.0821858	-0.492039	0.622692	0.840623	FALSE	FALSE	FALSE	FALSE	inactive	0.0753989
chr1	113255942	113256557	chr1	112713320	112713935	STARR_ID752	984.14	0.00175942	0.0911004	0.019313	0.984591	0.995323	FALSE	FALSE	FALSE	FALSE	inactive	0.00203596
chr1	113760130	113760450	chr1	113217508	113217828	STARR_ID755	108.369	0.0104485	0.236422	0.0441942	0.96475	0.98856	FALSE	FALSE	FALSE	FALSE	inactive	0.00499686
chr1	113798042	113798542	chr1	113255420	113255920	STARR_ID756	303.581	-0.221818	0.14643	-1.51484	0.129814	0.431877	FALSE	FALSE	FALSE	FALSE	inactive	0.36464
chr1	114354551	114355502	chr1	113811929	113812880	STARR_ID758	12039.3	-0.0502073	0.0913672	-0.549511	0.582654	0.821504	TRUE	TRUE	TRUE	TRUE	constitutive	0.0853902
chr1	114519182	114519943	chr1	113976560	113977321	STARR_ID759	1481.8	1.53936	0.136535	11.2745	1.75365e-29	1.45788e-27	TRUE	TRUE	FALSE	TRUE	induced	26.8363
chr1	114575717	114576217	chr1	114033095	114033595	STARR_ID760	699.089	-0.0164609	0.0744386	-0.221134	0.824988	0.930764	TRUE	TRUE	FALSE	FALSE	constitutive	0.0311605
chr1	115721911	115722734	chr1	115179290	115180113	STARR_ID762	14106.4	1.63236	0.216786	7.52982	5.08112e-14	1.23985e-12	TRUE	TRUE	TRUE	TRUE	induced	11.9066
chr1	116255717	116256217	chr1	115713096	115713596	STARR_ID763	998.817	-0.0610082	0.0770752	-0.791542	0.428628	0.734886	FALSE	FALSE	FALSE	FALSE	inactive	0.13378
chr1	116358217	116358717	chr1	115815596	115816096	STARR_ID765	1293.73	1.47136	0.177625	8.28353	1.19581e-16	3.71715e-15	TRUE	TRUE	TRUE	TRUE	induced	14.4298
chr1	116453910	116454410	chr1	115911289	115911789	STARR_ID766	1180.33	-0.0756752	0.0917089	-0.825167	0.409277	0.72375	FALSE	FALSE	FALSE	FALSE	inactive	0.140411
chr1	116495219	116495719	chr1	115952598	115953098	STARR_ID767	173.21	0.0876383	0.158405	0.553254	0.58009	0.820283	TRUE	TRUE	FALSE	FALSE	constitutive	0.0860362
chr1	116551272	116551772	chr1	116008651	116009151	STARR_ID768	885.811	0.121902	0.111938	1.08902	0.276145	0.615002	FALSE	FALSE	FALSE	FALSE	inactive	0.211124
chr1	116665778	116667074	chr1	116123157	116124453	STARR_ID769	1719.3	-0.0984574	0.0696623	-1.41335	0.157552	0.472805	FALSE	FALSE	FALSE	FALSE	inactive	0.325318
chr1	116810682	116811182	chr1	116268060	116268560	STARR_ID771	1642.41	0.0348955	0.152273	0.229165	0.818741	0.927916	TRUE	TRUE	TRUE	TRUE	constitutive	0.0324911
chr1	116854216	116855122	chr1	116311594	116312500	STARR_ID772	1222.91	-0.166508	0.138911	-1.19866	0.230659	0.566688	TRUE	TRUE	FALSE	FALSE	constitutive	0.246656
chr1	117161728	117162228	chr1	116619106	116619606	STARR_ID773	186.126	0.322172	0.171312	1.88061	0.0600248	0.279393	FALSE	FALSE	FALSE	FALSE	inactive	0.553785
chr1	117175122	117175622	chr1	116632500	116633000	STARR_ID774	414.31	0.0164085	0.135029	0.121518	0.903281	0.964316	TRUE	TRUE	FALSE	FALSE	constitutive	0.0157805
chr1	117396293	117396793	chr1	116853671	116854171	STARR_ID775	580.684	-0.18545	0.114316	-1.62226	0.104749	0.384998	TRUE	TRUE	TRUE	TRUE	constitutive	0.414541
chr1	117555935	117556435	chr1	117013313	117013813	STARR_ID776	283.412	-0.0882026	0.137884	-0.639689	0.522375	0.792487	TRUE	FALSE	FALSE	FALSE	constitutive	0.101008
chr1	117811422	117811922	chr1	117268800	117269300	STARR_ID780	655.043	-0.174339	0.144839	-1.20368	0.228714	0.56481	TRUE	TRUE	FALSE	FALSE	constitutive	0.248097
chr1	117905449	117906528	chr1	117362827	117363906	STARR_ID781	553.827	-0.0457432	0.144162	-0.317304	0.751013	0.899265	FALSE	FALSE	FALSE	FALSE	inactive	0.0461121
chr1	118083660	118084160	chr1	117541038	117541538	STARR_ID782	503.996	-0.0441272	0.118949	-0.370977	0.710654	0.881714	TRUE	TRUE	FALSE	FALSE	constitutive	0.0546723
chr1	118105390	118105890	chr1	117562768	117563268	STARR_ID783	390.419	-0.189161	0.129503	-1.46067	0.144105	0.453921	TRUE	FALSE	FALSE	FALSE	constitutive	0.34302
chr1	118113319	118114218	chr1	117570697	117571596	STARR_ID784	855.575	-0.101418	0.114194	-0.888119	0.374477	0.699919	FALSE	FALSE	FALSE	FALSE	inactive	0.154952
chr1	118132851	118135325	chr1	117590229	117592703	STARR_ID786	2170.31	-0.104534	0.062258	-1.67905	0.0931418	0.362245	TRUE	TRUE	FALSE	FALSE	constitutive	0.440997
chr1	118174900	118175661	chr1	117632278	117633039	STARR_ID787	899.223	-0.120593	0.09127	-1.32128	0.18641	0.515934	FALSE	FALSE	FALSE	FALSE	inactive	0.287406
chr1	118623925	118624510	chr1	118081302	118081887	STARR_ID788	1524.42	-0.315342	0.179169	-1.76002	0.0784042	0.326852	TRUE	TRUE	TRUE	TRUE	constitutive	0.485649
chr1	118659561	118660061	chr1	118116938	118117438	STARR_ID789	517.758	-0.0630689	0.108751	-0.579937	0.561957	0.81205	FALSE	FALSE	FALSE	FALSE	inactive	0.0904172
chr1	119178566	119179066	chr1	118635943	118636443	STARR_ID790	212.84	-0.0641196	0.155627	-0.412009	0.680333	0.868726	FALSE	FALSE	FALSE	FALSE	inactive	0.0611172
chr1	119203311	119203811	chr1	118660688	118661188	STARR_ID791	100.644	-0.133885	0.157736	-0.848787	0.396	0.71513	FALSE	FALSE	FALSE	FALSE	inactive	0.145615
chr1	120085167	120085667	chr1	119542544	119543044	STARR_ID793	547.717	-0.208035	0.0866351	-2.40128	0.016338	0.108006	TRUE	TRUE	FALSE	FALSE	constitutive	0.966551
chr1	120202886	120203705	chr1	119660263	119661082	STARR_ID794	551.469	-0.0410005	0.146212	-0.280418	0.779157	0.911391	FALSE	FALSE	FALSE	FALSE	inactive	0.0402954
chr1	120574841	120575341	chr1	120032218	120032718	STARR_ID796	444.591	0.149246	0.0922294	1.6182	0.10562	0.386791	FALSE	FALSE	FALSE	FALSE	inactive	0.412524
chr1	1051229	1051638	chr1	1115849	1116258	STARR_ID8	1109.94	0.0785732	0.11004	0.714039	0.475203	0.762527	TRUE	TRUE	FALSE	FALSE	constitutive	0.117745
chr1	8403399	8404234	chr1	8343339	8344174	STARR_ID80	13889.6	0.261936	0.17847	1.46768	0.142192	0.450821	TRUE	TRUE	TRUE	TRUE	constitutive	0.345996
chr1	145542597	145544308	chr1	145890767	145892478	STARR_ID807	787.978	-0.166115	0.107699	-1.5424	0.122977	0.420367	FALSE	FALSE	FALSE	FALSE	inactive	0.376371
chr1	145744001	145744501	chr1	145690563	145691063	STARR_ID809	140.996	-0.0476923	0.131314	-0.363193	0.716461	0.883869	FALSE	FALSE	FALSE	FALSE	inactive	0.0536119
chr1	8472439	8472939	chr1	8412379	8412879	STARR_ID81	557.792	-0.170659	0.191141	-0.892843	0.371941	0.697611	TRUE	TRUE	FALSE	FALSE	constitutive	0.156387
chr1	147006082	147006582	chr1	147534264	147534764	STARR_ID811	534.265	-0.0120546	0.130788	-0.0921693	0.926564	0.972113	TRUE	TRUE	FALSE	FALSE	constitutive	0.0122831
chr1	147010472	147011372	chr1	147538651	147539551	STARR_ID812	728.129	0.109074	0.133903	0.814576	0.415315	0.728021	FALSE	FALSE	FALSE	FALSE	inactive	0.137856
chr1	147022808	147023308	chr1	147551034	147551534	STARR_ID813	523.581	0.187768	0.137388	1.36669	0.171721	0.492665	FALSE	FALSE	FALSE	FALSE	inactive	0.307448
chr1	147084122	147084622	chr1	147612323	147612823	STARR_ID814	1016.08	-0.380515	0.077456	-4.91266	8.98504e-07	1.23417e-05	TRUE	TRUE	TRUE	TRUE	constitutive	4.90863
chr1	147142156	147143151	chr1	147670034	147671029	STARR_ID815	2848.02	-0.117609	0.116193	-1.01219	0.311446	0.647463	TRUE	TRUE	FALSE	FALSE	constitutive	0.188785
chr1	147188677	147189653	chr1	147716543	147717519	STARR_ID816	1804.24	-0.0444549	0.0888106	-0.500558	0.616682	0.837809	TRUE	TRUE	FALSE	FALSE	constitutive	0.076855
chr1	148561034	148561534	chr1	144456117	144456617	STARR_ID818	752.066	-0.0562963	0.0961353	-0.585594	0.558148	0.810167	FALSE	FALSE	FALSE	FALSE	inactive	0.0914252
chr1	149209422	149209927	chr1	143714765	143715270	STARR_ID819	1155.79	1.71398	0.135331	12.6651	9.22742e-37	1.49935e-34	TRUE	TRUE	FALSE	TRUE	induced	33.8241
chr1	149214575	149215190	chr1	143719919	143720534	STARR_ID820	487.554	-0.185155	0.156069	-1.18637	0.235477	0.570466	FALSE	FALSE	FALSE	FALSE	inactive	0.24377
chr1	149870837	149871270	chr1	149899284	149899717	STARR_ID822	1625.45	-0.12558	0.107024	-1.17338	0.240642	0.576661	TRUE	TRUE	FALSE	FALSE	constitutive	0.23908
chr1	149910968	149911468	chr1	149939068	149939568	STARR_ID824	1255.78	-0.208042	0.134056	-1.55191	0.120685	0.416076	TRUE	TRUE	TRUE	TRUE	constitutive	0.380827
chr1	150540600	150541100	chr1	150568124	150568624	STARR_ID828	1039.34	0.0163619	0.174762	0.0936237	0.925408	0.971669	TRUE	TRUE	FALSE	FALSE	constitutive	0.0124815
chr1	150596621	150597121	chr1	150624145	150624645	STARR_ID829	1623.33	-0.175667	0.13993	-1.25539	0.209338	0.542957	TRUE	TRUE	TRUE	TRUE	constitutive	0.265235
chr1	150943861	150944361	chr1	150971385	150971885	STARR_ID831	662.563	-0.289789	0.104048	-2.78515	0.00535026	0.0421506	TRUE	TRUE	TRUE	TRUE	constitutive	1.3752
chr1	151138413	151138773	chr1	151165937	151166297	STARR_ID832	2092.3	0.0118001	0.0990574	0.119124	0.905177	0.964317	TRUE	TRUE	TRUE	TRUE	constitutive	0.0157803
chr1	151283982	151284534	chr1	151311506	151312058	STARR_ID835	2266.88	0.233338	0.182082	1.2815	0.200019	0.531513	TRUE	TRUE	TRUE	TRUE	constitutive	0.274486
chr1	151486491	151486991	chr1	151514015	151514515	STARR_ID837	909.03	-0.0706534	0.130769	-0.540291	0.588996	0.823773	FALSE	FALSE	FALSE	FALSE	inactive	0.0841924
chr1	151519674	151520026	chr1	151547198	151547550	STARR_ID838	835.54	-0.242838	0.226477	-1.07224	0.283612	0.62226	TRUE	TRUE	FALSE	FALSE	constitutive	0.206028
chr1	8762165	8763796	chr1	8702106	8703737	STARR_ID84	2266.38	0.130025	0.232877	0.55834	0.576612	0.818847	TRUE	TRUE	FALSE	FALSE	constitutive	0.086797
chr1	151554452	151554961	chr1	151581976	151582485	STARR_ID840	1031.34	-0.0740647	0.109841	-0.674287	0.500129	0.778843	TRUE	FALSE	FALSE	FALSE	constitutive	0.10855
chr1	151584204	151584585	chr1	151611728	151612109	STARR_ID841	11734	-0.00607399	0.134439	-0.0451802	0.963964	0.988293	TRUE	TRUE	TRUE	TRUE	constitutive	0.00511447
chr1	151696325	151696825	chr1	151723849	151724349	STARR_ID842	240.855	0.114452	0.124103	0.922234	0.356406	0.684337	FALSE	FALSE	FALSE	FALSE	inactive	0.16473
chr1	151712342	151712842	chr1	151739866	151740366	STARR_ID843	354.817	-0.140457	0.107253	-1.30958	0.190337	0.520586	FALSE	FALSE	FALSE	FALSE	inactive	0.283507
chr1	151809290	151809790	chr1	151836814	151837314	STARR_ID845	314.913	-0.187794	0.134623	-1.39496	0.163027	0.479655	TRUE	TRUE	FALSE	FALSE	constitutive	0.319071
chr1	151971297	151971797	chr1	151998821	151999321	STARR_ID847	605.948	-0.167981	0.107917	-1.55657	0.119572	0.413885	TRUE	FALSE	FALSE	FALSE	constitutive	0.38312
chr1	152020169	152020812	chr1	152047693	152048336	STARR_ID848	2066.54	-0.116681	0.119634	-0.975319	0.329402	0.662312	TRUE	TRUE	FALSE	FALSE	constitutive	0.178938
chr1	152715435	152716286	chr1	152742959	152743810	STARR_ID849	1879.93	1.21445	0.0940743	12.9095	3.97765e-38	7.22088e-36	TRUE	TRUE	TRUE	TRUE	induced	35.1414
chr1	153451221	153451565	chr1	153478745	153479089	STARR_ID851	193.916	0.129942	0.146191	0.88885	0.374084	0.699859	FALSE	FALSE	FALSE	FALSE	inactive	0.154989
chr1	153483388	153483919	chr1	153510912	153511443	STARR_ID855	389.907	-0.0893198	0.133858	-0.66727	0.504599	0.781635	FALSE	FALSE	FALSE	FALSE	inactive	0.106996
chr1	153582868	153583368	chr1	153610392	153610892	STARR_ID856	687.237	-0.202345	0.10735	-1.88491	0.0594418	0.278219	FALSE	FALSE	FALSE	FALSE	inactive	0.555614
chr1	8823023	8824437	chr1	8762964	8764378	STARR_ID86	295.976	-0.0198367	0.114947	-0.172572	0.862988	0.949367	FALSE	FALSE	FALSE	FALSE	inactive	0.022566
chr1	154162841	154163512	chr1	154190365	154191036	STARR_ID862	2251.22	0.940844	0.165039	5.70074	1.19287e-08	1.9257e-07	TRUE	TRUE	FALSE	TRUE	constitutive	6.71541
chr1	154390699	154392471	chr1	154418223	154419995	STARR_ID863	4908.53	-0.27641	0.080902	-3.4166	0.000634083	0.00622716	TRUE	TRUE	TRUE	TRUE	constitutive	2.20571
chr1	154785997	154786497	chr1	154813521	154814021	STARR_ID866	2456.22	-0.101365	0.119052	-0.851437	0.394527	0.714003	TRUE	TRUE	TRUE	TRUE	constitutive	0.1463
chr1	154887111	154887556	chr1	154914635	154915080	STARR_ID867	801.56	1.27513	0.195305	6.52892	6.62473e-11	1.25135e-09	TRUE	TRUE	FALSE	TRUE	induced	8.90262
chr1	154973293	154975190	chr1	155000817	155002714	STARR_ID870	9261.33	-0.136449	0.168768	-0.808502	0.418802	0.729398	TRUE	TRUE	FALSE	FALSE	constitutive	0.137036
chr1	154977868	154978368	chr1	155005392	155005892	STARR_ID871	2947.39	0.493159	0.109427	4.50676	6.58257e-06	8.35916e-05	TRUE	TRUE	FALSE	FALSE	constitutive	4.07784
chr1	154989750	154990250	chr1	155017274	155017774	STARR_ID872	4537.6	-0.145651	0.184766	-0.788297	0.430523	0.736457	TRUE	TRUE	TRUE	TRUE	constitutive	0.132853
chr1	155011166	155011666	chr1	155038690	155039190	STARR_ID873	759.922	-0.0868831	0.0790505	-1.09908	0.271732	0.608894	FALSE	FALSE	FALSE	FALSE	inactive	0.215458
chr1	155096935	155098874	chr1	155124459	155126398	STARR_ID875	6550.14	-0.18262	0.108514	-1.68292	0.0923901	0.360362	TRUE	TRUE	FALSE	FALSE	constitutive	0.443261
chr1	155131358	155131858	chr1	155158882	155159382	STARR_ID876	784.31	-0.0372971	0.117554	-0.317277	0.751033	0.899265	FALSE	FALSE	FALSE	FALSE	inactive	0.0461121
chr1	155149629	155150129	chr1	155177153	155177653	STARR_ID877	2447.06	-0.0515825	0.0954616	-0.540348	0.588957	0.823773	FALSE	FALSE	FALSE	FALSE	inactive	0.0841924
chr1	155231679	155232350	chr1	155261888	155262559	STARR_ID879	5254.44	0.0372411	0.0606956	0.613571	0.539499	0.800535	TRUE	TRUE	FALSE	FALSE	constitutive	0.0966195
chr1	8939296	8939541	chr1	8879237	8879482	STARR_ID88	1132.15	0.426408	0.437235	0.975237	0.329442	0.662312	FALSE	TRUE	FALSE	FALSE	constitutive	0.178938
chr1	155660319	155660819	chr1	155690528	155691028	STARR_ID881	254.347	-0.083194	0.152431	-0.54578	0.585217	0.82239	FALSE	FALSE	FALSE	FALSE	inactive	0.084922
chr1	155990657	155991318	chr1	156020866	156021527	STARR_ID882	792.094	-0.0320926	0.126394	-0.253908	0.799566	0.92037	TRUE	TRUE	FALSE	FALSE	constitutive	0.0360376
chr1	156024006	156024999	chr1	156054215	156055208	STARR_ID883	12804.4	-0.036193	0.115993	-0.312029	0.755019	0.900868	TRUE	TRUE	FALSE	FALSE	constitutive	0.0453388
chr1	156093242	156093742	chr1	156123451	156123951	STARR_ID885	1697.47	-0.134786	0.125442	-1.07449	0.282604	0.621302	TRUE	TRUE	FALSE	FALSE	constitutive	0.206697
chr1	156426943	156427776	chr1	156457151	156457984	STARR_ID888	1616.77	-0.0331877	0.082458	-0.40248	0.687331	0.871437	TRUE	TRUE	FALSE	FALSE	constitutive	0.0597642
chr1	156441360	156441860	chr1	156471568	156472068	STARR_ID889	1115.86	-0.146979	0.0972795	-1.5109	0.130815	0.433292	TRUE	TRUE	FALSE	FALSE	constitutive	0.363219
chr1	8963900	8964365	chr1	8903841	8904306	STARR_ID89	2391.13	-0.122122	0.155846	-0.783605	0.433272	0.736955	TRUE	TRUE	TRUE	TRUE	constitutive	0.132559
chr1	156458386	156458886	chr1	156488594	156489094	STARR_ID890	486.672	-0.0181037	0.0936982	-0.193213	0.846792	0.939688	FALSE	FALSE	FALSE	FALSE	inactive	0.0270163
chr1	156586022	156586522	chr1	156616230	156616730	STARR_ID893	296.686	0.179298	0.127223	1.40932	0.15874	0.474064	FALSE	FALSE	FALSE	FALSE	inactive	0.324163
chr1	156609441	156609941	chr1	156639649	156640149	STARR_ID894	975.202	-0.0390884	0.0927625	-0.421382	0.673476	0.864957	TRUE	TRUE	FALSE	FALSE	constitutive	0.0630057
chr1	156662393	156662893	chr1	156692601	156693101	STARR_ID895	1380.88	-0.187768	0.108388	-1.73237	0.0832081	0.337967	TRUE	FALSE	FALSE	FALSE	constitutive	0.471126
chr1	156679618	156680118	chr1	156709826	156710326	STARR_ID896	1068.91	-0.0571596	0.0723375	-0.790179	0.429423	0.735353	FALSE	FALSE	FALSE	FALSE	inactive	0.133504
chr1	156710860	156711206	chr1	156741068	156741414	STARR_ID897	2183.72	0.0329654	0.0855966	0.385126	0.700144	0.876034	TRUE	TRUE	TRUE	TRUE	constitutive	0.0574791
chr1	156718324	156718824	chr1	156748532	156749032	STARR_ID898	3704.77	-0.0320509	0.142155	-0.225465	0.821618	0.929007	TRUE	TRUE	FALSE	FALSE	constitutive	0.0319812
chr1	156736907	156737684	chr1	156767115	156767892	STARR_ID899	50437.3	-0.0433278	0.124609	-0.347711	0.728057	0.889272	TRUE	TRUE	TRUE	TRUE	constitutive	0.0509656
chr1	9184590	9185518	chr1	9124531	9125459	STARR_ID90	270.868	-0.0921032	0.171307	-0.53765	0.590819	0.824464	FALSE	FALSE	FALSE	FALSE	inactive	0.0838285
chr1	157102092	157102592	chr1	157132300	157132800	STARR_ID902	154.724	-0.0320628	0.143669	-0.223172	0.823402	0.929678	FALSE	FALSE	FALSE	FALSE	inactive	0.0316673
chr1	159940688	159941126	chr1	159970898	159971336	STARR_ID914	468.609	0.173138	0.141137	1.22673	0.219922	0.553546	FALSE	FALSE	FALSE	FALSE	inactive	0.256846
chr1	160031116	160031616	chr1	160061326	160061826	STARR_ID915	1749.85	0.425465	0.137389	3.09678	0.00195635	0.017332	FALSE	FALSE	FALSE	FALSE	inactive	1.76115
chr1	160284981	160285928	chr1	160315191	160316138	STARR_ID918	1062.05	0.0105255	0.0722116	0.145759	0.884112	0.956055	FALSE	FALSE	FALSE	FALSE	inactive	0.0195171
chr1	161053218	161053718	chr1	161083428	161083928	STARR_ID921	9878.24	-0.309498	0.137662	-2.24824	0.0245607	0.149127	TRUE	TRUE	TRUE	TRUE	constitutive	0.826445
chr1	161088595	161088997	chr1	161118805	161119207	STARR_ID922	549.655	-0.099101	0.0831331	-1.19208	0.233231	0.568722	FALSE	FALSE	FALSE	FALSE	inactive	0.2451
chr1	162122101	162122601	chr1	162152311	162152811	STARR_ID926	938.541	-0.132003	0.0691467	-1.90903	0.0562582	0.268503	TRUE	TRUE	FALSE	FALSE	constitutive	0.57105
chr1	162129175	162129705	chr1	162159385	162159915	STARR_ID927	7325.14	1.27441	0.104928	12.1456	6.0508e-34	7.86549e-32	TRUE	TRUE	TRUE	TRUE	induced	31.1043
chr1	162135326	162135826	chr1	162165536	162166036	STARR_ID928	419.215	-0.0427575	0.0983882	-0.434579	0.663868	0.861143	FALSE	FALSE	FALSE	FALSE	inactive	0.0649247
chr1	162177031	162177531	chr1	162207241	162207741	STARR_ID929	454.345	-0.0527588	0.116062	-0.454576	0.649414	0.85347	FALSE	FALSE	FALSE	FALSE	inactive	0.0688116
chr1	162183276	162183776	chr1	162213486	162213986	STARR_ID930	300.33	-0.142744	0.148883	-0.958768	0.337676	0.670042	TRUE	FALSE	FALSE	FALSE	constitutive	0.173898
chr1	162254991	162255491	chr1	162285201	162285701	STARR_ID932	1680.95	-0.0700893	0.144189	-0.486092	0.626902	0.842614	TRUE	TRUE	FALSE	FALSE	constitutive	0.0743716
chr1	162299575	162300075	chr1	162329785	162330285	STARR_ID933	252.77	0.182335	0.117953	1.54582	0.122147	0.418792	TRUE	TRUE	FALSE	FALSE	constitutive	0.378001
chr1	162762172	162762672	chr1	162792382	162792882	STARR_ID936	566.011	0.487865	0.112833	4.32379	1.53369e-05	0.000187438	TRUE	TRUE	FALSE	FALSE	constitutive	3.72714
chr1	162816590	162817090	chr1	162846800	162847300	STARR_ID937	283.331	-0.0907842	0.101787	-0.891905	0.372444	0.697857	FALSE	FALSE	FALSE	FALSE	inactive	0.156234
chr1	9363122	9363622	chr1	9303063	9303563	STARR_ID94	646.52	0.190118	0.115861	1.64091	0.100816	0.376778	TRUE	TRUE	FALSE	FALSE	constitutive	0.423914
chr1	164559672	164560172	chr1	164590435	164590935	STARR_ID940	207.362	-0.0579335	0.119143	-0.486251	0.62679	0.842614	FALSE	FALSE	FALSE	FALSE	inactive	0.0743716
chr1	164567822	164568322	chr1	164598585	164599085	STARR_ID941	156.017	0.0338729	0.164558	0.205842	0.836915	0.935949	FALSE	FALSE	FALSE	FALSE	inactive	0.0287479
chr1	164580956	164581513	chr1	164611719	164612276	STARR_ID942	720.718	0.045873	0.164616	0.278666	0.780501	0.912169	TRUE	TRUE	FALSE	FALSE	constitutive	0.0399248
chr1	164629367	164629867	chr1	164660130	164660630	STARR_ID943	831.349	-0.169744	0.183683	-0.924111	0.355428	0.683376	FALSE	FALSE	FALSE	FALSE	inactive	0.16534
chr1	164726764	164727359	chr1	164757527	164758122	STARR_ID944	193.384	-0.14875	0.137856	-1.07902	0.280577	0.619131	FALSE	FALSE	FALSE	FALSE	inactive	0.208217
chr1	165131918	165132418	chr1	165162681	165163181	STARR_ID946	696.273	-0.0843199	0.10455	-0.806503	0.419953	0.730061	TRUE	TRUE	FALSE	FALSE	constitutive	0.136641
chr1	9385801	9386301	chr1	9325742	9326242	STARR_ID95	2289.08	0.329967	0.0813091	4.05818	4.94573e-05	0.000572161	TRUE	TRUE	FALSE	FALSE	constitutive	3.24248
chr1	165742489	165742971	chr1	165773252	165773734	STARR_ID950	11.5314	-0.00887033	0.548997	-0.0161573	0.987109	0.996211	FALSE	FALSE	FALSE	FALSE	inactive	0.0016487
chr1	168578342	168578842	chr1	168609104	168609604	STARR_ID955	678.126	-0.0469763	0.107451	-0.437187	0.661976	0.859883	TRUE	FALSE	FALSE	FALSE	constitutive	0.0655608
chr1	168849307	168849807	chr1	168880069	168880569	STARR_ID959	444.755	-0.0178826	0.122981	-0.145409	0.884388	0.956136	FALSE	FALSE	FALSE	FALSE	inactive	0.0194802
chr1	168876278	168876778	chr1	168907040	168907540	STARR_ID960	1949.6	0.212808	0.120238	1.76989	0.0767456	0.322476	TRUE	TRUE	TRUE	TRUE	constitutive	0.491503
chr1	168908779	168909279	chr1	168939541	168940041	STARR_ID962	118.639	0.0254944	0.171082	0.149019	0.881539	0.955192	TRUE	TRUE	FALSE	FALSE	constitutive	0.0199093
chr1	169042493	169042993	chr1	169073255	169073755	STARR_ID965	962.507	-0.185702	0.121402	-1.52964	0.126105	0.42598	FALSE	FALSE	FALSE	FALSE	inactive	0.370611
chr1	169078050	169078550	chr1	169108812	169109312	STARR_ID966	714.613	0.0961137	0.164389	0.584673	0.558768	0.810409	TRUE	TRUE	FALSE	FALSE	constitutive	0.0912959
chr1	169478487	169480288	chr1	169509249	169511050	STARR_ID968	118.975	-0.0973549	0.219311	-0.443912	0.657106	0.856992	FALSE	FALSE	FALSE	FALSE	inactive	0.0670232
chr1	169498516	169499016	chr1	169529278	169529778	STARR_ID969	25062.3	0.061963	0.162655	0.380948	0.703242	0.877763	TRUE	TRUE	TRUE	TRUE	constitutive	0.0566226
chr1	169860474	169860974	chr1	169891333	169891833	STARR_ID971	208.838	0.112698	0.157549	0.715317	0.474413	0.761796	FALSE	FALSE	FALSE	FALSE	inactive	0.118161
chr1	172329707	172330207	chr1	172360567	172361067	STARR_ID976	599.334	-0.0607376	0.180302	-0.336865	0.736218	0.892437	FALSE	FALSE	FALSE	FALSE	inactive	0.0494225
chr1	172453346	172453846	chr1	172484206	172484706	STARR_ID978	223.731	-0.0578176	0.127079	-0.454973	0.649129	0.853374	FALSE	FALSE	FALSE	FALSE	inactive	0.0688606
chr1	172715504	172716004	chr1	172746364	172746864	STARR_ID981	410.924	0.559135	0.100127	5.58425	2.34716e-08	3.6922e-07	TRUE	TRUE	TRUE	TRUE	constitutive	6.43271
chr1	175138401	175138901	chr1	175169265	175169765	STARR_ID986	216.651	-0.0250317	0.133928	-0.186905	0.851735	0.942971	FALSE	FALSE	FALSE	FALSE	inactive	0.0255017
chr1	175147570	175148070	chr1	175178434	175178934	STARR_ID987	431.167	-0.0993554	0.0962817	-1.03192	0.302108	0.638652	FALSE	FALSE	FALSE	FALSE	inactive	0.194736
chr1	175149175	175149675	chr1	175180039	175180539	STARR_ID988	375.069	0.0889334	0.105326	0.844361	0.398467	0.7166	FALSE	FALSE	FALSE	FALSE	inactive	0.144723
chr1	175156204	175156707	chr1	175187068	175187571	STARR_ID989	2699.04	0.762048	0.112472	6.77546	1.24012e-11	2.526e-10	TRUE	TRUE	FALSE	TRUE	constitutive	9.59757
chr1	9541970	9543355	chr1	9481911	9483296	STARR_ID99	2109.43	-0.0446185	0.0770695	-0.578939	0.56263	0.812148	TRUE	TRUE	FALSE	FALSE	constitutive	0.0903646
chr1	175286793	175287293	chr1	175317657	175318157	STARR_ID991	1095.71	-0.129974	0.122311	-1.06265	0.287942	0.625388	TRUE	TRUE	TRUE	TRUE	constitutive	0.20385
chr1	175505429	175505929	chr1	175536293	175536793	STARR_ID992	397.107	0.0413803	0.131006	0.315865	0.752105	0.899795	TRUE	TRUE	FALSE	FALSE	constitutive	0.0458564
chr1	175642517	175643017	chr1	175673381	175673881	STARR_ID993	642.318	-0.168195	0.123587	-1.36095	0.173531	0.496065	FALSE	FALSE	FALSE	FALSE	inactive	0.304461
chr1	176468830	176469330	chr1	176499694	176500194	STARR_ID996	83.2385	0.362582	0.208593	1.73823	0.082171	0.335699	FALSE	FALSE	FALSE	FALSE	inactive	0.47405
chr1	177270440	177270940	chr1	177301304	177301804	STARR_ID998	262.39	-0.134044	0.142324	-0.941823	0.346283	0.676777	FALSE	FALSE	FALSE	FALSE	inactive	0.169555
chr1	177409982	177410482	chr1	177440846	177441346	STARR_ID999	105.766	-0.0566588	0.160683	-0.352612	0.724379	0.887346	FALSE	FALSE	FALSE	FALSE	inactive	0.0519072
chr10	136060	136560	chr10	90120	90620	STARR_ID1494	103.409	0.030795	0.172398	0.178627	0.85823	0.946315	FALSE	FALSE	FALSE	FALSE	inactive	0.0239643
chr10	152879	153379	chr10	106939	107439	STARR_ID1495	17.0255	-0.0627179	0.344386	-0.182115	0.855492	0.944892	FALSE	FALSE	FALSE	FALSE	inactive	0.0246178
chr10	384539	385039	chr10	338599	339099	STARR_ID1496	2871.52	0.0186538	0.130323	0.143136	0.886183	0.95719	FALSE	FALSE	FALSE	FALSE	inactive	0.019002
chr10	410429	410929	chr10	364489	364989	STARR_ID1498	1510.27	0.473119	0.10168	4.65302	3.27101e-06	4.27143e-05	TRUE	TRUE	FALSE	FALSE	constitutive	4.36943
chr10	482086	482598	chr10	436146	436658	STARR_ID1499	10344.6	0.163058	0.106496	1.53112	0.125741	0.425253	TRUE	TRUE	FALSE	FALSE	constitutive	0.371353
chr10	563151	563651	chr10	517211	517711	STARR_ID1501	775.013	0.169071	0.115515	1.46362	0.143297	0.452618	FALSE	FALSE	FALSE	FALSE	inactive	0.344268
chr10	566317	566817	chr10	520377	520877	STARR_ID1502	340.464	0.00629515	0.110472	0.0569841	0.954558	0.984451	TRUE	TRUE	FALSE	FALSE	constitutive	0.00680582
chr10	658939	659439	chr10	612999	613499	STARR_ID1503	1280.81	-0.188581	0.121269	-1.55506	0.119931	0.414717	TRUE	TRUE	TRUE	TRUE	constitutive	0.382248
chr10	1016334	1016834	chr10	970394	970894	STARR_ID1505	337.926	0.115613	0.108588	1.06469	0.287015	0.624707	TRUE	TRUE	FALSE	FALSE	constitutive	0.204323
chr10	1310985	1311485	chr10	1268790	1269290	STARR_ID1506	171.451	1.13353	0.151533	7.48046	7.40628e-14	1.77987e-12	FALSE	TRUE	FALSE	TRUE	induced	11.7496
chr10	3510261	3510761	chr10	3468069	3468569	STARR_ID1510	424.281	-0.157667	0.148094	-1.06465	0.287036	0.624707	TRUE	TRUE	FALSE	FALSE	constitutive	0.204323
chr10	3825966	3828008	chr10	3783774	3785816	STARR_ID1511	11366.7	-0.140832	0.168689	-0.834861	0.403796	0.720144	TRUE	TRUE	TRUE	TRUE	constitutive	0.142581
chr10	3852217	3852717	chr10	3810025	3810525	STARR_ID1512	980.147	-0.210509	0.19362	-1.08723	0.276935	0.61556	TRUE	TRUE	FALSE	FALSE	constitutive	0.210729
chr10	3894443	3894943	chr10	3852251	3852751	STARR_ID1513	794.067	-0.0366199	0.2744	-0.133455	0.893834	0.961336	TRUE	TRUE	TRUE	TRUE	constitutive	0.0171249
chr10	3948861	3949361	chr10	3906669	3907169	STARR_ID1514	229.257	0.31527	0.111689	2.82275	0.0047613	0.0382024	TRUE	TRUE	FALSE	FALSE	constitutive	1.41791
chr10	3978189	3978689	chr10	3935997	3936497	STARR_ID1515	238.857	-0.151062	0.141568	-1.06706	0.285943	0.62416	TRUE	FALSE	FALSE	FALSE	constitutive	0.204704
chr10	4170170	4170670	chr10	4127978	4128478	STARR_ID1516	297.701	-0.0585908	0.132588	-0.441903	0.65856	0.857783	FALSE	FALSE	FALSE	FALSE	inactive	0.0666224
chr10	4321870	4322370	chr10	4279678	4280178	STARR_ID1517	434.497	0.224335	0.129978	1.72595	0.0843557	0.340543	FALSE	TRUE	FALSE	FALSE	constitutive	0.467829
chr10	4567395	4567895	chr10	4525203	4525703	STARR_ID1519	274.993	0.801417	0.138682	5.77879	7.52382e-09	1.2423e-07	FALSE	TRUE	FALSE	FALSE	constitutive	6.90577
chr10	4705291	4705791	chr10	4663099	4663599	STARR_ID1520	36209.4	-0.183979	0.265901	-0.691908	0.488995	0.771578	TRUE	TRUE	TRUE	TRUE	constitutive	0.11262
chr10	5121983	5122483	chr10	5079791	5080291	STARR_ID1521	186.255	-0.19681	0.129893	-1.51517	0.129728	0.431799	FALSE	FALSE	FALSE	FALSE	inactive	0.364718
chr10	5158106	5158606	chr10	5115914	5116414	STARR_ID1522	42.1958	-0.223502	0.234494	-0.953127	0.340526	0.671782	FALSE	FALSE	FALSE	FALSE	inactive	0.172771
chr10	5508356	5508856	chr10	5466393	5466893	STARR_ID1523	1912.72	-0.145608	0.0909023	-1.60181	0.109197	0.392392	TRUE	TRUE	FALSE	FALSE	constitutive	0.40628
chr10	5530365	5530865	chr10	5488402	5488902	STARR_ID1524	3480.86	-0.178483	0.125752	-1.41933	0.155804	0.470228	TRUE	TRUE	FALSE	FALSE	constitutive	0.327692
chr10	5535620	5536120	chr10	5493657	5494157	STARR_ID1525	889.285	-0.200462	0.0850847	-2.35602	0.0184717	0.118496	TRUE	TRUE	TRUE	TRUE	constitutive	0.926298
chr10	5538454	5538954	chr10	5496491	5496991	STARR_ID1526	1484.27	0.467056	0.0847403	5.51161	3.55564e-08	5.55045e-07	TRUE	TRUE	FALSE	FALSE	constitutive	6.25567
chr10	5545393	5545893	chr10	5503430	5503930	STARR_ID1527	677.748	-0.199581	0.102567	-1.94586	0.0516718	0.253206	FALSE	FALSE	FALSE	FALSE	inactive	0.596526
chr10	5586492	5590507	chr10	5544529	5548544	STARR_ID1528	4919.78	-0.0880831	0.0533962	-1.64961	0.0990224	0.373791	TRUE	TRUE	FALSE	FALSE	constitutive	0.427371
chr10	5596109	5596609	chr10	5554146	5554646	STARR_ID1529	981.36	-0.0938819	0.136337	-0.6886	0.491075	0.772864	FALSE	FALSE	FALSE	FALSE	inactive	0.111897
chr10	5625633	5626133	chr10	5583670	5584170	STARR_ID1530	1937.22	-0.0915097	0.143232	-0.638893	0.522893	0.792487	TRUE	TRUE	FALSE	FALSE	constitutive	0.101008
chr10	5698561	5699061	chr10	5656598	5657098	STARR_ID1534	117.73	0.158746	0.154681	1.02628	0.304758	0.64127	FALSE	FALSE	FALSE	FALSE	inactive	0.192959
chr10	5701949	5702539	chr10	5659986	5660576	STARR_ID1535	2616.57	2.02277	0.151619	13.3411	1.33415e-40	3.02809e-38	TRUE	TRUE	FALSE	TRUE	induced	37.5188
chr10	5707492	5707992	chr10	5665529	5666029	STARR_ID1536	1061.33	-0.129655	0.0891705	-1.45401	0.145943	0.456538	TRUE	TRUE	FALSE	FALSE	constitutive	0.340523
chr10	6195183	6197148	chr10	6153220	6155185	STARR_ID1540	7449.61	0.521816	0.127015	4.10829	3.98591e-05	0.000466786	TRUE	TRUE	FALSE	FALSE	constitutive	3.33088
chr10	6339770	6341641	chr10	6297807	6299678	STARR_ID1543	2202.97	-0.0224193	0.165102	-0.135791	0.891987	0.960358	TRUE	TRUE	FALSE	FALSE	constitutive	0.0175668
chr10	6404864	6405364	chr10	6362902	6363402	STARR_ID1545	128.266	0.134963	0.157445	0.857208	0.39133	0.711641	FALSE	FALSE	FALSE	FALSE	inactive	0.147739
chr10	6443505	6444005	chr10	6401543	6402043	STARR_ID1546	2388.92	0.102464	0.135629	0.755471	0.449967	0.746655	TRUE	TRUE	TRUE	TRUE	constitutive	0.12688
chr10	7275487	7275987	chr10	7233525	7234025	STARR_ID1547	557.573	-0.376804	0.0998055	-3.77538	0.000159761	0.00173852	TRUE	TRUE	TRUE	TRUE	constitutive	2.75982
chr10	8008915	8009415	chr10	7966952	7967452	STARR_ID1548	229.522	-0.00520862	0.126952	-0.0410281	0.967274	0.989005	TRUE	TRUE	FALSE	FALSE	constitutive	0.00480143
chr10	8126727	8127227	chr10	8084764	8085264	STARR_ID1549	388.571	-0.0242698	0.102732	-0.236243	0.813244	0.925621	FALSE	FALSE	FALSE	FALSE	inactive	0.0335668
chr10	8170283	8170783	chr10	8128320	8128820	STARR_ID1550	1051.54	0.651883	0.104816	6.21929	4.99412e-10	8.85992e-09	TRUE	TRUE	FALSE	FALSE	constitutive	8.05257
chr10	8832187	8832687	chr10	8790224	8790724	STARR_ID1552	47.0634	-0.186798	0.283572	-0.658734	0.510066	0.785412	FALSE	FALSE	FALSE	FALSE	inactive	0.104903
chr10	8993436	8993936	chr10	8951473	8951973	STARR_ID1554	26.452	-0.107377	0.335202	-0.320335	0.748714	0.898595	FALSE	FALSE	FALSE	FALSE	inactive	0.0464358
chr10	9078620	9079120	chr10	9036657	9037157	STARR_ID1555	239.878	0.0373347	0.120225	0.31054	0.75615	0.901242	TRUE	TRUE	FALSE	FALSE	constitutive	0.0451588
chr10	12095511	12096011	chr10	12053512	12054012	STARR_ID1561	418.02	-0.364734	0.11585	-3.14833	0.00164208	0.0148233	FALSE	FALSE	FALSE	FALSE	inactive	1.82906
chr10	12192183	12192683	chr10	12150184	12150684	STARR_ID1562	1223.74	1.89931	0.163344	11.6277	2.97958e-31	2.8983e-29	TRUE	TRUE	TRUE	TRUE	induced	28.5379
chr10	12375614	12376114	chr10	12333615	12334115	STARR_ID1563	549.258	-0.285212	0.100396	-2.84087	0.00449907	0.036387	TRUE	TRUE	TRUE	TRUE	constitutive	1.43905
chr10	12645061	12645588	chr10	12603062	12603589	STARR_ID1564	1632.06	-0.065709	0.0730217	-0.899856	0.368197	0.694249	FALSE	FALSE	FALSE	FALSE	inactive	0.158485
chr10	12647739	12648239	chr10	12605740	12606240	STARR_ID1565	1635.36	-0.0422648	0.0697753	-0.605727	0.544696	0.803861	TRUE	TRUE	FALSE	FALSE	constitutive	0.0948193
chr10	12762367	12762810	chr10	12720368	12720811	STARR_ID1566	1113.53	-0.312193	0.172488	-1.80994	0.0703049	0.306485	TRUE	TRUE	TRUE	TRUE	constitutive	0.513591
chr10	12914930	12915430	chr10	12872930	12873430	STARR_ID1567	1596.56	0.0801302	0.10236	0.782828	0.433728	0.736955	FALSE	FALSE	FALSE	FALSE	inactive	0.132559
chr10	12916999	12917499	chr10	12874999	12875499	STARR_ID1568	373.765	-0.0529788	0.146365	-0.361964	0.717379	0.884532	FALSE	FALSE	FALSE	FALSE	inactive	0.0532863
chr10	14302109	14302609	chr10	14260110	14260610	STARR_ID1571	269.133	-0.114589	0.108501	-1.05611	0.290918	0.628055	FALSE	FALSE	FALSE	FALSE	inactive	0.202003
chr10	14449514	14450014	chr10	14407515	14408015	STARR_ID1572	369.152	0.436468	0.119172	3.6625	0.000249762	0.00263788	TRUE	TRUE	TRUE	TRUE	constitutive	2.57875
chr10	14613973	14614473	chr10	14571974	14572474	STARR_ID1573	1800.39	-0.217893	0.0983448	-2.21561	0.0267185	0.159253	TRUE	TRUE	TRUE	TRUE	constitutive	0.797912
chr10	14695714	14696214	chr10	14653715	14654215	STARR_ID1575	1025.95	-0.161948	0.0848561	-1.90851	0.0563259	0.268705	TRUE	TRUE	TRUE	TRUE	constitutive	0.570724
chr10	17429987	17430487	chr10	17387988	17388488	STARR_ID1576	545.972	-0.135215	0.115172	-1.17402	0.240385	0.576199	TRUE	TRUE	FALSE	FALSE	constitutive	0.239428
chr10	17492106	17492606	chr10	17450107	17450607	STARR_ID1578	263.907	-0.24417	0.122868	-1.98726	0.0468933	0.237944	FALSE	FALSE	FALSE	FALSE	inactive	0.623524
chr10	17507745	17508245	chr10	17465746	17466246	STARR_ID1579	303.714	0.234497	0.120508	1.94591	0.0516655	0.253206	TRUE	TRUE	FALSE	FALSE	constitutive	0.596526
chr10	19001943	19002443	chr10	18713014	18713514	STARR_ID1581	359.713	-0.0942359	0.114046	-0.826297	0.408636	0.723512	TRUE	TRUE	FALSE	FALSE	constitutive	0.140554
chr10	19443333	19443833	chr10	19154404	19154904	STARR_ID1583	48.3147	-0.265799	0.246966	-1.07626	0.281813	0.620068	FALSE	FALSE	FALSE	FALSE	inactive	0.207561
chr10	19789867	19790367	chr10	19500938	19501438	STARR_ID1584	1386.31	0.212944	0.165829	1.28411	0.199102	0.530259	TRUE	TRUE	FALSE	FALSE	constitutive	0.275512
chr10	21484238	21484738	chr10	21195309	21195809	STARR_ID1586	43.2682	-0.423064	0.237208	-1.78351	0.0745031	0.315931	FALSE	FALSE	FALSE	FALSE	inactive	0.500408
chr10	21919303	21919803	chr10	21630374	21630874	STARR_ID1587	1172.77	1.63035	0.19699	8.2763	1.27064e-16	3.9157e-15	TRUE	TRUE	FALSE	TRUE	induced	14.4072
chr10	22375595	22376095	chr10	22086666	22087166	STARR_ID1588	254.22	-0.156934	0.137343	-1.14265	0.253185	0.589837	TRUE	TRUE	FALSE	FALSE	constitutive	0.229268
chr10	22481614	22482114	chr10	22192685	22193185	STARR_ID1590	159.072	0.0137444	0.163315	0.0841587	0.93293	0.975429	TRUE	TRUE	FALSE	FALSE	constitutive	0.0108043
chr10	22757388	22757888	chr10	22468459	22468959	STARR_ID1591	73.6408	0.232852	0.176366	1.32028	0.186741	0.516183	FALSE	FALSE	FALSE	FALSE	inactive	0.287197
chr10	22921986	22922486	chr10	22633057	22633557	STARR_ID1592	140.919	-0.0994463	0.174975	-0.568347	0.5698	0.815195	TRUE	TRUE	FALSE	FALSE	constitutive	0.0887387
chr10	22972258	22972758	chr10	22683329	22683829	STARR_ID1593	595.115	-0.0924595	0.110086	-0.839882	0.400974	0.718585	FALSE	FALSE	FALSE	FALSE	inactive	0.143522
chr10	23370235	23370735	chr10	23081306	23081806	STARR_ID1595	104.621	-0.0655351	0.202362	-0.323851	0.746051	0.897049	FALSE	FALSE	FALSE	FALSE	inactive	0.0471838
chr10	24157117	24158912	chr10	23868188	23869983	STARR_ID1597	730.278	-0.165313	0.126751	-1.30423	0.192155	0.522759	TRUE	TRUE	FALSE	FALSE	constitutive	0.281699
chr10	24746758	24747258	chr10	24457829	24458329	STARR_ID1599	585.483	-0.0808319	0.206882	-0.390714	0.696008	0.87446	TRUE	TRUE	FALSE	FALSE	constitutive	0.0582603
chr10	24783039	24783539	chr10	24494110	24494610	STARR_ID1601	212.719	-0.0559246	0.124658	-0.448623	0.653703	0.855016	TRUE	FALSE	FALSE	FALSE	constitutive	0.0680255
chr10	24830257	24830757	chr10	24541328	24541828	STARR_ID1602	750.732	-0.094664	0.0805273	-1.17555	0.239774	0.575547	FALSE	FALSE	FALSE	FALSE	inactive	0.239919
chr10	27271018	27271518	chr10	26982089	26982589	STARR_ID1603	22.4312	0.878329	0.312509	2.81057	0.00494537	0.039373	TRUE	TRUE	FALSE	TRUE	constitutive	1.4048
chr10	27276791	27277291	chr10	26987862	26988362	STARR_ID1604	182.617	-0.0844714	0.13054	-0.647094	0.517571	0.78905	FALSE	FALSE	FALSE	FALSE	inactive	0.102895
chr10	27377658	27378158	chr10	27088729	27089229	STARR_ID1605	429.154	-0.146141	0.102427	-1.42679	0.153642	0.467132	FALSE	FALSE	FALSE	FALSE	inactive	0.330561
chr10	27529264	27529764	chr10	27240335	27240835	STARR_ID1606	2212.85	-0.0907835	0.0656335	-1.38319	0.166607	0.4849	TRUE	TRUE	FALSE	FALSE	constitutive	0.314348
chr10	27926455	27926955	chr10	27637526	27638026	STARR_ID1608	27.9676	0.549881	0.298356	1.84304	0.0653235	0.293605	FALSE	TRUE	FALSE	FALSE	constitutive	0.532237
chr10	28545726	28546226	chr10	28256797	28257297	STARR_ID1609	182.633	0.663058	0.145683	4.55136	5.33002e-06	6.8109e-05	TRUE	TRUE	FALSE	FALSE	constitutive	4.1668
chr10	28552208	28552708	chr10	28263279	28263779	STARR_ID1610	393.401	-0.121062	0.108077	-1.12015	0.26265	0.599927	FALSE	FALSE	FALSE	FALSE	inactive	0.221902
chr10	29228588	29229088	chr10	28939659	28940159	STARR_ID1613	332.618	-0.083608	0.108168	-0.772945	0.439555	0.74078	TRUE	TRUE	FALSE	FALSE	constitutive	0.130311
chr10	29311413	29312969	chr10	29022484	29024040	STARR_ID1614	604.317	-0.0649006	0.106874	-0.60726	0.543678	0.803022	TRUE	FALSE	FALSE	FALSE	constitutive	0.0952726
chr10	29396792	29397292	chr10	29107863	29108363	STARR_ID1615	277.012	0.0702611	0.109726	0.640331	0.521958	0.79224	FALSE	FALSE	FALSE	FALSE	inactive	0.101143
chr10	29413787	29414287	chr10	29124858	29125358	STARR_ID1616	239.956	0.0783177	0.143164	0.547049	0.584345	0.821949	FALSE	FALSE	FALSE	FALSE	inactive	0.085155
chr10	29607308	29607808	chr10	29318379	29318879	STARR_ID1617	931.755	-0.0821389	0.139661	-0.588129	0.556446	0.809464	FALSE	FALSE	FALSE	FALSE	inactive	0.0918025
chr10	29908129	29908557	chr10	29619200	29619628	STARR_ID1618	152.603	-0.128061	0.140484	-0.91157	0.361995	0.688137	TRUE	FALSE	FALSE	FALSE	constitutive	0.162325
chr10	29919155	29919659	chr10	29630226	29630730	STARR_ID1619	801.503	-0.120869	0.0798751	-1.51322	0.130224	0.432334	TRUE	TRUE	FALSE	FALSE	constitutive	0.36418
chr10	30080783	30081283	chr10	29791854	29792354	STARR_ID1620	214.909	-0.23898	0.122199	-1.95566	0.0505055	0.249027	FALSE	FALSE	FALSE	FALSE	inactive	0.603754
chr10	30097588	30098185	chr10	29808659	29809256	STARR_ID1621	517.261	0.162958	0.149526	1.08983	0.275789	0.61454	FALSE	TRUE	FALSE	FALSE	constitutive	0.21145
chr10	30100880	30101544	chr10	29811951	29812615	STARR_ID1622	1640.7	0.927202	0.125322	7.39856	1.37666e-13	3.23765e-12	TRUE	TRUE	FALSE	TRUE	constitutive	11.4898
chr10	30722220	30724070	chr10	30433291	30435141	STARR_ID1623	5326.07	-0.0432075	0.0642606	-0.672379	0.501342	0.779798	TRUE	TRUE	FALSE	FALSE	constitutive	0.108018
chr10	30825470	30825970	chr10	30536541	30537041	STARR_ID1624	386.965	0.00687872	0.109176	0.063006	0.949762	0.9826	FALSE	FALSE	FALSE	FALSE	inactive	0.00762312
chr10	30831116	30831616	chr10	30542187	30542687	STARR_ID1625	1079.53	1.00724	0.145796	6.90854	4.89684e-12	1.04041e-10	TRUE	TRUE	FALSE	TRUE	induced	9.98279
chr10	32047817	32049696	chr10	31758889	31760768	STARR_ID1629	6458.07	0.140279	0.112445	1.24754	0.212201	0.545838	FALSE	FALSE	FALSE	FALSE	inactive	0.262937
chr10	32649129	32649629	chr10	32360201	32360701	STARR_ID1631	716.469	0.107323	0.116526	0.921027	0.357036	0.684535	FALSE	FALSE	FALSE	FALSE	inactive	0.164604
chr10	33299081	33299581	chr10	33010153	33010653	STARR_ID1632	227.462	-0.166697	0.117937	-1.41344	0.157528	0.472805	TRUE	TRUE	FALSE	FALSE	constitutive	0.325318
chr10	33624386	33625266	chr10	33335458	33336338	STARR_ID1633	6127.1	-0.0113122	0.0733317	-0.154261	0.877404	0.953371	TRUE	TRUE	FALSE	FALSE	constitutive	0.0207383
chr10	35243057	35243557	chr10	34954129	34954629	STARR_ID1636	289.213	0.00649583	0.128724	0.0504632	0.959753	0.98631	FALSE	FALSE	FALSE	FALSE	inactive	0.00598647
chr10	38382832	38383793	chr10	38093904	38094865	STARR_ID1637	2635.73	-0.0665468	0.0611487	-1.08828	0.276472	0.615008	TRUE	TRUE	FALSE	FALSE	constitutive	0.211119
chr10	43048017	43048754	chr10	42552569	42553306	STARR_ID1638	1670.03	-0.060156	0.077957	-0.771657	0.440318	0.741202	TRUE	FALSE	FALSE	FALSE	constitutive	0.130063
chr10	43521755	43522255	chr10	43026307	43026807	STARR_ID1639	3383.45	0.601417	0.0734027	8.19339	2.53964e-16	7.5341e-15	TRUE	TRUE	TRUE	TRUE	constitutive	14.123
chr10	43577508	43578008	chr10	43082060	43082560	STARR_ID1640	896.88	-0.195213	0.076816	-2.54131	0.0110439	0.0786832	TRUE	TRUE	FALSE	FALSE	constitutive	1.10412
chr10	43606189	43606689	chr10	43110741	43111241	STARR_ID1641	3586.65	1.71785	0.084202	20.4015	1.62132e-92	2.31832e-88	TRUE	TRUE	FALSE	TRUE	induced	87.6348
chr10	44092074	44092574	chr10	43596626	43597126	STARR_ID1645	674.206	0.467894	0.119019	3.93124	8.45072e-05	0.000952221	FALSE	TRUE	FALSE	FALSE	constitutive	3.02126
chr10	44349504	44350004	chr10	43854056	43854556	STARR_ID1647	4969.85	-0.259934	0.180592	-1.43935	0.150052	0.462698	TRUE	TRUE	TRUE	TRUE	constitutive	0.334702
chr10	44820483	44820983	chr10	44325035	44325535	STARR_ID1649	338.865	-0.0230418	0.137442	-0.167648	0.86686	0.951096	FALSE	FALSE	FALSE	FALSE	inactive	0.0217757
chr10	44988071	44988571	chr10	44492623	44493123	STARR_ID1650	85.6402	0.912128	0.2021	4.51326	6.38397e-06	8.11417e-05	TRUE	TRUE	FALSE	TRUE	constitutive	4.09076
chr10	45137390	45137890	chr10	44641942	44642442	STARR_ID1651	46.6169	1.29023	0.19183	6.7259	1.74514e-11	3.49004e-10	TRUE	TRUE	TRUE	TRUE	induced	9.45717
chr10	45965817	45966317	chr10	45470369	45470869	STARR_ID1655	651.68	-0.0379112	0.114646	-0.330679	0.740887	0.894607	FALSE	FALSE	FALSE	FALSE	inactive	0.0483676
chr10	49459637	49460312	chr10	48251594	48252269	STARR_ID1660	1393.03	-0.0354989	0.168153	-0.211111	0.832801	0.934271	TRUE	TRUE	TRUE	TRUE	constitutive	0.0295271
chr10	49495923	49496423	chr10	48287880	48288380	STARR_ID1661	1695.03	0.337099	0.0978098	3.44648	0.000567948	0.00563965	TRUE	TRUE	FALSE	FALSE	constitutive	2.24875
chr10	49514270	49514770	chr10	48306227	48306727	STARR_ID1662	1495.97	0.107371	0.190612	0.563299	0.573231	0.816398	FALSE	FALSE	FALSE	FALSE	inactive	0.0880982
chr10	50022926	50023426	chr10	48814881	48815381	STARR_ID1663	6043.88	1.14419	0.102483	11.1646	6.07426e-29	4.72043e-27	TRUE	TRUE	TRUE	TRUE	induced	26.326
chr10	50627008	50627508	chr10	49418962	49419462	STARR_ID1664	3313.45	-0.181982	0.176151	-1.03311	0.301555	0.638237	TRUE	TRUE	TRUE	TRUE	constitutive	0.195018
chr10	51547289	51547914	chr10	46047907	46048532	STARR_ID1665	4874.61	1.17563	0.169133	6.9509	3.62963e-12	7.7928e-11	FALSE	TRUE	FALSE	TRUE	induced	10.1083
chr10	52261460	52261960	chr10	50501700	50502200	STARR_ID1666	51.7215	0.190126	0.242094	0.785339	0.432255	0.736955	FALSE	FALSE	FALSE	FALSE	inactive	0.132559
chr10	52365090	52365590	chr10	50605330	50605830	STARR_ID1667	213.347	0.21217	0.140556	1.50951	0.13117	0.433934	FALSE	FALSE	FALSE	FALSE	inactive	0.362576
chr10	58310867	58311367	chr10	56551107	56551607	STARR_ID1668	665.901	-0.154982	0.192278	-0.806028	0.420227	0.730061	TRUE	TRUE	TRUE	TRUE	constitutive	0.136641
chr10	61082815	61083315	chr10	59323055	59323555	STARR_ID1669	415.826	0.182154	0.119805	1.52042	0.128405	0.430259	FALSE	FALSE	FALSE	FALSE	inactive	0.36627
chr10	61448601	61449101	chr10	59688843	59689343	STARR_ID1671	162.887	0.0342085	0.206324	0.165799	0.868315	0.951621	FALSE	FALSE	FALSE	FALSE	inactive	0.021536
chr10	61548714	61549214	chr10	59788956	59789456	STARR_ID1672	218.925	0.305036	0.118508	2.57396	0.0100541	0.0724248	FALSE	FALSE	FALSE	FALSE	inactive	1.14011
chr10	61725205	61725705	chr10	59965447	59965947	STARR_ID1673	7438.14	-0.271287	0.0892366	-3.04009	0.00236508	0.0205083	TRUE	TRUE	TRUE	TRUE	constitutive	1.68807
chr10	61791245	61791745	chr10	60031487	60031987	STARR_ID1675	101.32	0.0739697	0.172121	0.429754	0.667374	0.863132	FALSE	FALSE	FALSE	FALSE	inactive	0.0639229
chr10	61931345	61931683	chr10	60171587	60171925	STARR_ID1676	80.6118	-0.735634	0.17507	-4.20195	2.64623e-05	0.000314273	TRUE	TRUE	TRUE	FALSE	constitutive	3.50269
chr10	62233306	62233806	chr10	60473548	60474048	STARR_ID1677	1921.27	-0.402789	0.202868	-1.98548	0.0470914	0.238526	TRUE	TRUE	TRUE	TRUE	constitutive	0.622463
chr10	62607833	62609112	chr10	60848075	60849354	STARR_ID1679	8779.1	1.98844	0.139842	14.2192	6.95955e-46	2.55166e-43	TRUE	TRUE	TRUE	TRUE	induced	42.5932
chr10	62702532	62703032	chr10	60942774	60943274	STARR_ID1680	501.919	0.0508947	0.103028	0.493987	0.621315	0.840147	FALSE	FALSE	FALSE	FALSE	inactive	0.0756448
chr10	62835364	62835864	chr10	61075606	61076106	STARR_ID1681	111.964	0.319821	0.206022	1.55236	0.120577	0.415853	FALSE	FALSE	FALSE	FALSE	inactive	0.381061
chr10	63031227	63031727	chr10	61271469	61271969	STARR_ID1683	2720.77	0.458828	0.125839	3.64616	0.000266191	0.00280681	TRUE	TRUE	TRUE	TRUE	constitutive	2.55179
chr10	63169576	63170076	chr10	61409818	61410318	STARR_ID1684	232.004	1.07773	0.144163	7.47582	7.67258e-14	1.84078e-12	TRUE	TRUE	FALSE	TRUE	induced	11.735
chr10	65389167	65391077	chr10	63629407	63631317	STARR_ID1686	8980.87	0.476128	0.0635168	7.4961	6.57431e-14	1.58526e-12	TRUE	TRUE	FALSE	FALSE	constitutive	11.7999
chr10	65471932	65472498	chr10	63712172	63712738	STARR_ID1687	1125.15	-0.0111351	0.0756086	-0.147273	0.882917	0.95563	TRUE	TRUE	FALSE	FALSE	constitutive	0.0197104
chr10	67650878	67651378	chr10	65891120	65891620	STARR_ID1688	617.552	-0.297235	0.200177	-1.48486	0.137581	0.443453	TRUE	TRUE	TRUE	TRUE	constitutive	0.353153
chr10	69579542	69580042	chr10	67819784	67820284	STARR_ID1689	2332.99	0.179122	0.0845289	2.11906	0.0340851	0.19031	TRUE	TRUE	FALSE	FALSE	constitutive	0.72054
chr10	69968156	69968656	chr10	68208399	68208899	STARR_ID1690	255.865	-0.0340539	0.140507	-0.242364	0.808498	0.923823	TRUE	TRUE	FALSE	FALSE	constitutive	0.0344114
chr10	70571329	70571829	chr10	68811572	68812072	STARR_ID1691	637.827	-0.0331349	0.147513	-0.224623	0.822273	0.929171	FALSE	FALSE	FALSE	FALSE	inactive	0.0319042
chr10	70973404	70973904	chr10	69213648	69214148	STARR_ID1693	595.142	0.22668	0.143865	1.57564	0.115108	0.404804	FALSE	TRUE	FALSE	FALSE	constitutive	0.392755
chr10	71078308	71079638	chr10	69318552	69319882	STARR_ID1694	4495.15	0.127273	0.0700371	1.81722	0.0691837	0.3041	TRUE	TRUE	FALSE	FALSE	constitutive	0.516984
chr10	71092889	71093421	chr10	69333133	69333665	STARR_ID1695	6530.99	-0.211276	0.236099	-0.894862	0.370861	0.696563	TRUE	TRUE	TRUE	TRUE	constitutive	0.157039
chr10	71181617	71182117	chr10	69421861	69422361	STARR_ID1699	2117.75	0.535658	0.0775522	6.90707	4.94773e-12	1.04967e-10	TRUE	TRUE	FALSE	FALSE	constitutive	9.97895
chr10	71199003	71199503	chr10	69439247	69439747	STARR_ID1700	3160.13	0.665614	0.106547	6.24713	4.18073e-10	7.4632e-09	TRUE	TRUE	FALSE	FALSE	constitutive	8.12707
chr10	71841096	71841619	chr10	70081340	70081863	STARR_ID1701	43858.2	2.11062	0.253226	8.33495	7.75295e-17	2.44184e-15	TRUE	TRUE	TRUE	TRUE	induced	14.6123
chr10	71879958	71880458	chr10	70120202	70120702	STARR_ID1702	411.754	0.101935	0.122894	0.829452	0.406849	0.72197	FALSE	FALSE	FALSE	FALSE	inactive	0.141481
chr10	73006556	73007056	chr10	71246799	71247299	STARR_ID1705	1445.94	0.0930215	0.112068	0.830044	0.406514	0.72197	TRUE	TRUE	FALSE	FALSE	constitutive	0.141481
chr10	73068668	73069168	chr10	71308911	71309411	STARR_ID1706	2790.96	1.06938	0.133159	8.03087	9.6782e-16	2.74037e-14	TRUE	TRUE	FALSE	TRUE	induced	13.5622
chr10	73093989	73094489	chr10	71334232	71334732	STARR_ID1707	789.345	-0.093213	0.0977379	-0.953704	0.340234	0.671683	TRUE	TRUE	FALSE	FALSE	constitutive	0.172836
chr10	73099640	73100140	chr10	71339883	71340383	STARR_ID1708	10691.9	-0.107651	0.140654	-0.765366	0.444054	0.743534	TRUE	TRUE	TRUE	TRUE	constitutive	0.128699
chr10	73103037	73103537	chr10	71343280	71343780	STARR_ID1709	376.814	-0.262492	0.106418	-2.46662	0.0136396	0.0929168	FALSE	FALSE	FALSE	FALSE	inactive	1.03191
chr10	73272588	73273088	chr10	71512831	71513331	STARR_ID1711	1389.06	-0.121013	0.111166	-1.08858	0.27634	0.615002	TRUE	TRUE	FALSE	FALSE	constitutive	0.211124
chr10	73349733	73350233	chr10	71589976	71590476	STARR_ID1712	416.076	-0.083174	0.109559	-0.759174	0.447748	0.745204	FALSE	FALSE	FALSE	FALSE	inactive	0.127725
chr10	73627895	73628395	chr10	71868137	71868637	STARR_ID1713	1807.95	0.443666	0.153549	2.8894	0.00385974	0.0317186	TRUE	TRUE	FALSE	FALSE	constitutive	1.49869
chr10	73828633	73829133	chr10	72068875	72069375	STARR_ID1715	2225.93	0.723741	0.133392	5.42566	5.77392e-08	8.86802e-07	TRUE	TRUE	FALSE	FALSE	constitutive	6.05217
chr10	73930859	73931359	chr10	72171101	72171601	STARR_ID1716	780.244	-0.195087	0.111441	-1.7506	0.0800157	0.330677	TRUE	TRUE	TRUE	TRUE	constitutive	0.480595
chr10	74091439	74091939	chr10	72331681	72332181	STARR_ID1722	5025.22	-0.124863	0.105413	-1.18451	0.236211	0.571116	TRUE	TRUE	TRUE	TRUE	constitutive	0.243276
chr10	75361239	75361739	chr10	73601481	73601981	STARR_ID1727	675.546	-0.0867525	0.111318	-0.779321	0.435791	0.738063	TRUE	FALSE	FALSE	FALSE	constitutive	0.131907
chr10	75544793	75545540	chr10	73785035	73785782	STARR_ID1728	9118.95	0.0448105	0.158002	0.283607	0.776712	0.910401	TRUE	TRUE	TRUE	TRUE	constitutive	0.0407674
chr10	75579220	75579720	chr10	73819462	73819962	STARR_ID1729	5997.11	0.133881	0.089374	1.49798	0.134138	0.438308	TRUE	TRUE	TRUE	TRUE	constitutive	0.358221
chr10	75631679	75632179	chr10	73871921	73872421	STARR_ID1730	809.493	-0.196948	0.0913731	-2.15542	0.0311288	0.177547	FALSE	FALSE	FALSE	FALSE	inactive	0.750686
chr10	75949664	75950107	chr10	74189906	74190349	STARR_ID1731	6468.14	-0.275606	0.104419	-2.63943	0.00830466	0.0616874	TRUE	TRUE	TRUE	TRUE	constitutive	1.2098
chr10	76345215	76345680	chr10	74585457	74585922	STARR_ID1733	160.818	0.206669	0.138295	1.49441	0.135068	0.439745	FALSE	FALSE	FALSE	FALSE	inactive	0.356799
chr10	76503062	76503613	chr10	74743304	74743855	STARR_ID1735	2671.69	0.0427178	0.0654847	0.652332	0.514187	0.786826	TRUE	TRUE	FALSE	FALSE	constitutive	0.104121
chr10	76661072	76661572	chr10	74901314	74901814	STARR_ID1738	107.989	-0.311083	0.174353	-1.78421	0.0743895	0.315637	FALSE	FALSE	FALSE	FALSE	inactive	0.500812
chr10	77004992	77005563	chr10	75245234	75245805	STARR_ID1739	2894.43	-0.0967523	0.171168	-0.565248	0.571905	0.81585	TRUE	TRUE	FALSE	FALSE	constitutive	0.0883897
chr10	77022410	77022910	chr10	75262652	75263152	STARR_ID1740	684.763	0.283642	0.121396	2.3365	0.0194654	0.12343	FALSE	TRUE	FALSE	FALSE	constitutive	0.908578
chr10	78401820	78402320	chr10	76642062	76642562	STARR_ID1742	895.946	1.62446	0.214039	7.58953	3.21073e-14	8.02626e-13	FALSE	TRUE	FALSE	TRUE	induced	12.0955
chr10	78923689	78924189	chr10	77163931	77164431	STARR_ID1744	397.456	-0.102926	0.182094	-0.565235	0.571914	0.81585	TRUE	TRUE	TRUE	TRUE	constitutive	0.0883897
chr10	79047408	79047908	chr10	77287650	77288150	STARR_ID1745	830.15	0.477022	0.0730388	6.53108	6.52958e-11	1.23501e-09	TRUE	TRUE	FALSE	FALSE	constitutive	8.90833
chr10	79169783	79170283	chr10	77410025	77410525	STARR_ID1749	1620.79	1.15742	0.108941	10.6243	2.29738e-26	1.45355e-24	FALSE	TRUE	FALSE	TRUE	induced	23.8376
chr10	79176408	79176908	chr10	77416650	77417150	STARR_ID1751	1225.11	-0.117495	0.0979183	-1.19993	0.230167	0.566386	FALSE	FALSE	FALSE	FALSE	inactive	0.246888
chr10	79190838	79191466	chr10	77431080	77431708	STARR_ID1752	690.956	-0.247481	0.164075	-1.50834	0.131467	0.434445	TRUE	TRUE	FALSE	FALSE	constitutive	0.362065
chr10	79239763	79240263	chr10	77480005	77480505	STARR_ID1753	839.489	-0.0125844	0.102744	-0.122482	0.902517	0.964074	FALSE	FALSE	FALSE	FALSE	inactive	0.0158897
chr10	79267033	79267533	chr10	77507275	77507775	STARR_ID1755	221.363	0.0141358	0.120872	0.116949	0.906901	0.964366	FALSE	FALSE	FALSE	FALSE	inactive	0.015758
chr10	79293411	79293911	chr10	77533653	77534153	STARR_ID1756	354.982	-0.160737	0.123647	-1.29997	0.193611	0.524432	FALSE	FALSE	FALSE	FALSE	inactive	0.280311
chr10	79342333	79342833	chr10	77582575	77583075	STARR_ID1758	9048.68	0.0457143	0.117401	0.389387	0.69699	0.87478	TRUE	TRUE	TRUE	TRUE	constitutive	0.0581009
chr10	79366539	79367039	chr10	77606781	77607281	STARR_ID1759	444.735	-0.124395	0.0892574	-1.39367	0.163418	0.479846	FALSE	FALSE	FALSE	FALSE	inactive	0.318898
chr10	79616983	79617483	chr10	77857225	77857725	STARR_ID1760	1704.59	-0.161001	0.129446	-1.24377	0.213586	0.547204	TRUE	TRUE	TRUE	FALSE	constitutive	0.261851
chr10	79625489	79625989	chr10	77865731	77866231	STARR_ID1761	483.723	-0.0583911	0.103545	-0.563919	0.572809	0.816122	TRUE	TRUE	FALSE	FALSE	constitutive	0.0882451
chr10	79629661	79630161	chr10	77869903	77870403	STARR_ID1762	552.749	-0.0282811	0.106838	-0.264709	0.791233	0.917614	TRUE	FALSE	FALSE	FALSE	constitutive	0.0373401
chr10	79631963	79632502	chr10	77872205	77872744	STARR_ID1763	1443.29	0.0514725	0.0977732	0.526448	0.598577	0.829124	FALSE	FALSE	FALSE	FALSE	inactive	0.0813803
chr10	79637656	79638156	chr10	77877898	77878398	STARR_ID1764	1130.8	-0.16802	0.0859887	-1.95397	0.0507043	0.24971	FALSE	FALSE	FALSE	FALSE	inactive	0.602564
chr10	79648961	79649692	chr10	77889203	77889934	STARR_ID1765	6713.36	0.0929496	0.121854	0.762798	0.445584	0.744196	FALSE	TRUE	FALSE	FALSE	constitutive	0.128313
chr10	79731926	79732426	chr10	77972168	77972668	STARR_ID1767	85.0482	0.312871	0.242163	1.29198	0.196363	0.527049	FALSE	FALSE	FALSE	FALSE	inactive	0.278149
chr10	79945367	79945867	chr10	78185610	78186110	STARR_ID1769	756.461	0.939571	0.17471	5.3779	7.53596e-08	1.14635e-06	FALSE	TRUE	FALSE	FALSE	constitutive	5.94068
chr10	80061688	80063674	chr10	78301931	78303917	STARR_ID1771	18052.3	-0.0644283	0.0841831	-0.765336	0.444071	0.743534	TRUE	TRUE	FALSE	FALSE	constitutive	0.128699
chr10	80274539	80275144	chr10	78514782	78515387	STARR_ID1775	1651.19	0.187659	0.0894244	2.09852	0.0358596	0.197014	TRUE	TRUE	FALSE	FALSE	constitutive	0.705503
chr10	80450970	80451470	chr10	78691213	78691713	STARR_ID1777	737.827	-0.0707355	0.0904665	-0.781897	0.434275	0.736955	FALSE	FALSE	FALSE	FALSE	inactive	0.132559
chr10	80502391	80502891	chr10	78742634	78743134	STARR_ID1778	861.886	-0.0459108	0.0893894	-0.513605	0.607528	0.833311	TRUE	TRUE	FALSE	FALSE	constitutive	0.0791927
chr10	80516285	80516785	chr10	78756528	78757028	STARR_ID1779	1695.1	-0.0951352	0.0919651	-1.03447	0.300916	0.637888	TRUE	FALSE	FALSE	FALSE	constitutive	0.195256
chr10	80687059	80687559	chr10	78927302	78927802	STARR_ID1780	2580.51	-0.111425	0.0856478	-1.30097	0.19327	0.524297	TRUE	TRUE	FALSE	FALSE	constitutive	0.280422
chr10	80737384	80738153	chr10	78977627	78978396	STARR_ID1784	5435.61	0.224051	0.123091	1.82021	0.0687276	0.302904	FALSE	FALSE	FALSE	FALSE	inactive	0.518694
chr10	80830658	80831158	chr10	79070901	79071401	STARR_ID1786	1031.48	-0.00240438	0.117643	-0.020438	0.983694	0.995323	TRUE	TRUE	FALSE	FALSE	constitutive	0.00203596
chr10	80853655	80855583	chr10	79093898	79095826	STARR_ID1790	2333.04	-0.13292	0.108829	-1.22137	0.221947	0.556497	FALSE	FALSE	FALSE	FALSE	inactive	0.254537
chr10	80886792	80887292	chr10	79127035	79127535	STARR_ID1791	1104.54	-0.111975	0.0755872	-1.4814	0.1385	0.444937	FALSE	FALSE	FALSE	FALSE	inactive	0.351701
chr10	80888365	80888865	chr10	79128608	79129108	STARR_ID1792	1119.3	1.43097	0.163219	8.76717	1.83211e-18	6.37405e-17	FALSE	TRUE	FALSE	TRUE	induced	16.1956
chr10	80917189	80918723	chr10	79157432	79158966	STARR_ID1796	101974	-0.291479	0.174708	-1.66838	0.0952409	0.365892	TRUE	TRUE	TRUE	TRUE	constitutive	0.436647
chr10	80922586	80923086	chr10	79162829	79163329	STARR_ID1797	917.112	-0.0824693	0.0867948	-0.950165	0.342028	0.672718	TRUE	TRUE	FALSE	FALSE	constitutive	0.172167
chr10	81024707	81025207	chr10	79264950	79265450	STARR_ID1799	1004.59	-0.194315	0.108338	-1.7936	0.0728777	0.312153	FALSE	FALSE	FALSE	FALSE	inactive	0.505632
chr10	81102286	81102786	chr10	79342529	79343030	STARR_ID1802	1189.3	-0.0661783	0.0804563	-0.822537	0.410771	0.72487	FALSE	FALSE	FALSE	FALSE	inactive	0.13974
chr10	81118463	81118963	chr10	79358707	79359207	STARR_ID1803	913.609	1.91356	0.167873	11.3989	4.23652e-30	3.80994e-28	TRUE	TRUE	FALSE	TRUE	induced	27.4191
chr10	82050662	82051162	chr10	80290906	80291406	STARR_ID1807	571.543	0.894945	0.133042	6.72681	1.73422e-11	3.47305e-10	TRUE	TRUE	FALSE	TRUE	constitutive	9.45929
chr10	82080140	82080640	chr10	80320384	80320884	STARR_ID1808	631.619	-0.0395765	0.123009	-0.321736	0.747653	0.898075	FALSE	FALSE	FALSE	FALSE	inactive	0.0466873
chr10	82137958	82138458	chr10	80378202	80378702	STARR_ID1809	115.324	0.00831725	0.163247	0.0509489	0.959366	0.986205	FALSE	FALSE	FALSE	FALSE	inactive	0.00603291
chr10	82726241	82726741	chr10	80966485	80966985	STARR_ID1812	184.46	0.186699	0.16677	1.1195	0.262927	0.599959	FALSE	TRUE	FALSE	FALSE	constitutive	0.221878
chr10	83950358	83950858	chr10	82190602	82191102	STARR_ID1813	324.43	0.0701577	0.139347	0.503476	0.614629	0.836403	FALSE	FALSE	FALSE	FALSE	inactive	0.0775846
chr10	84429705	84430030	chr10	82669949	82670274	STARR_ID1814	508.875	0.557058	0.142569	3.90728	9.3342e-05	0.00104518	FALSE	TRUE	FALSE	FALSE	constitutive	2.98081
chr10	85738483	85738983	chr10	83978727	83979227	STARR_ID1816	219.316	0.0930279	0.134967	0.689266	0.490656	0.77259	FALSE	FALSE	FALSE	FALSE	inactive	0.112051
chr10	86768265	86768765	chr10	85008509	85009009	STARR_ID1817	1685.53	-0.00451733	0.148105	-0.0305009	0.975668	0.992111	TRUE	TRUE	TRUE	TRUE	constitutive	0.00343954
chr10	87375750	87376463	chr10	85615993	85616706	STARR_ID1818	981.207	0.221684	0.0884567	2.50613	0.012206	0.0850141	FALSE	FALSE	FALSE	FALSE	inactive	1.07051
chr10	88162808	88163308	chr10	86403051	86403551	STARR_ID1819	532.382	0.18865	0.119397	1.58003	0.114101	0.403146	FALSE	TRUE	FALSE	FALSE	constitutive	0.394538
chr10	88768005	88768562	chr10	87008248	87008805	STARR_ID1823	651.309	0.248161	0.106938	2.32061	0.020308	0.12781	TRUE	TRUE	FALSE	FALSE	constitutive	0.893435
chr10	88852359	88852859	chr10	87092602	87093102	STARR_ID1824	136.42	-0.0862205	0.135446	-0.636565	0.524408	0.793193	FALSE	FALSE	FALSE	FALSE	inactive	0.100621
chr10	89417026	89417491	chr10	87657269	87657734	STARR_ID1825	277.326	1.24884	0.161351	7.73987	9.95167e-15	2.56394e-13	TRUE	TRUE	FALSE	TRUE	induced	12.5911
chr10	89878798	89879298	chr10	88119041	88119541	STARR_ID1827	589.998	-0.112073	0.0816868	-1.37198	0.17007	0.489697	TRUE	FALSE	FALSE	FALSE	constitutive	0.310073
chr10	89891483	89891983	chr10	88131726	88132226	STARR_ID1828	487.319	-0.238056	0.118256	-2.01306	0.044108	0.227608	TRUE	TRUE	FALSE	FALSE	constitutive	0.642813
chr10	89912457	89912957	chr10	88152700	88153200	STARR_ID1829	837.137	-0.0194411	0.124288	-0.15642	0.875702	0.953305	FALSE	FALSE	FALSE	FALSE	inactive	0.0207683
chr10	89969960	89970460	chr10	88210203	88210703	STARR_ID1830	380.799	0.13883	0.0868726	1.59808	0.110025	0.393606	TRUE	TRUE	FALSE	FALSE	constitutive	0.404939
chr10	90145267	90146438	chr10	88385510	88386681	STARR_ID1831	597.811	1.28046	0.131409	9.74407	1.95563e-22	9.25946e-21	FALSE	TRUE	FALSE	FALSE	induced	20.0334
chr10	90234211	90234971	chr10	88474454	88475214	STARR_ID1832	1013.4	0.0163869	0.105376	0.155509	0.87642	0.953371	FALSE	FALSE	FALSE	FALSE	inactive	0.0207383
chr10	91235267	91236974	chr10	89475510	89477217	STARR_ID1834	654.576	-0.139542	0.111417	-1.25243	0.210414	0.543677	FALSE	FALSE	FALSE	FALSE	inactive	0.264659
chr10	92079361	92079861	chr10	90319604	90320104	STARR_ID1835	1021.43	0.706808	0.219943	3.2136	0.00131084	0.0120771	TRUE	TRUE	TRUE	TRUE	constitutive	1.91804
chr10	93120589	93121089	chr10	91360832	91361332	STARR_ID1837	256.321	0.604434	0.12365	4.88825	1.01736e-06	1.38809e-05	TRUE	TRUE	FALSE	TRUE	constitutive	4.85758
chr10	93316517	93317017	chr10	91556760	91557260	STARR_ID1838	219.12	-0.0054201	0.128644	-0.0421325	0.966393	0.988971	TRUE	TRUE	FALSE	FALSE	constitutive	0.00481645
chr10	93449933	93450433	chr10	91690176	91690676	STARR_ID1839	1452.84	-0.129082	0.0908849	-1.42028	0.155527	0.469992	FALSE	FALSE	FALSE	FALSE	inactive	0.32791
chr10	93548280	93548780	chr10	91788523	91789023	STARR_ID1840	116.086	-0.0808432	0.225141	-0.359079	0.719536	0.885731	FALSE	FALSE	FALSE	FALSE	inactive	0.0526983
chr10	93882653	93883285	chr10	92122896	92123528	STARR_ID1841	913.407	-0.0927424	0.151459	-0.612325	0.540323	0.800797	FALSE	FALSE	FALSE	FALSE	inactive	0.0964776
chr10	93884496	93884996	chr10	92124739	92125239	STARR_ID1842	305.494	-0.157523	0.107786	-1.46144	0.143893	0.453921	FALSE	FALSE	FALSE	FALSE	inactive	0.34302
chr10	94651986	94652486	chr10	92892229	92892729	STARR_ID1843	740.825	-0.309167	0.1674	-1.84688	0.064765	0.292414	TRUE	TRUE	TRUE	TRUE	constitutive	0.534002
chr10	95194792	95195318	chr10	93435035	93435561	STARR_ID1844	780.49	1.34123	0.15047	8.91361	4.93972e-19	1.80187e-17	TRUE	TRUE	FALSE	TRUE	induced	16.7443
chr10	95198532	95199032	chr10	93438775	93439275	STARR_ID1845	323.984	-0.0893128	0.12501	-0.714444	0.474953	0.762354	FALSE	FALSE	FALSE	FALSE	inactive	0.117843
chr10	95205239	95205739	chr10	93445482	93445982	STARR_ID1846	1945.46	-0.327372	0.122492	-2.6726	0.00752653	0.0568525	TRUE	TRUE	TRUE	TRUE	constitutive	1.24525
chr10	95225804	95226304	chr10	93466047	93466547	STARR_ID1847	880.9	0.0242925	0.09828	0.247176	0.804772	0.922346	TRUE	TRUE	FALSE	FALSE	constitutive	0.0351061
chr10	97046448	97046948	chr10	95286691	95287191	STARR_ID1849	236.126	-0.261813	0.141744	-1.84708	0.0647354	0.292373	FALSE	FALSE	FALSE	FALSE	inactive	0.534063
chr10	98392733	98393192	chr10	96632976	96633435	STARR_ID1854	351.585	-0.377939	0.124352	-3.03927	0.00237156	0.0205396	TRUE	TRUE	TRUE	FALSE	constitutive	1.68741
chr10	98623735	98624235	chr10	96863978	96864478	STARR_ID1856	267.019	-0.201346	0.151753	-1.3268	0.184576	0.513191	TRUE	TRUE	TRUE	TRUE	constitutive	0.289721
chr10	99096637	99097516	chr10	97336880	97337759	STARR_ID1857	715.531	-0.00663515	0.089553	-0.0740919	0.940937	0.978862	FALSE	FALSE	FALSE	FALSE	inactive	0.00927843
chr10	99207808	99208308	chr10	97448051	97448551	STARR_ID1858	281.38	-0.139808	0.111029	-1.2592	0.207956	0.541327	FALSE	FALSE	FALSE	FALSE	inactive	0.266541
chr10	100074369	100074718	chr10	98314612	98314961	STARR_ID1859	648.372	1.14736	0.12197	9.40691	5.1095e-21	2.18092e-19	TRUE	TRUE	FALSE	TRUE	induced	18.6614
chr10	100083030	100083392	chr10	98323273	98323635	STARR_ID1860	581.902	-0.0288667	0.11004	-0.262328	0.793068	0.918077	FALSE	FALSE	FALSE	FALSE	inactive	0.0371209
chr10	100122880	100123380	chr10	98363123	98363623	STARR_ID1861	246.809	-0.181886	0.153262	-1.18676	0.235321	0.570296	TRUE	FALSE	FALSE	FALSE	constitutive	0.2439
chr10	100709047	100709451	chr10	98949290	98949694	STARR_ID1863	104.803	-0.252252	0.201354	-1.25278	0.210285	0.543677	FALSE	FALSE	FALSE	FALSE	inactive	0.264659
chr10	101210575	101211075	chr10	99450818	99451318	STARR_ID1865	512.708	-0.167011	0.117175	-1.4253	0.15407	0.467836	FALSE	FALSE	FALSE	FALSE	inactive	0.329906
chr10	101756985	101757324	chr10	99997228	99997567	STARR_ID1867	68.3685	-0.490255	0.260342	-1.88312	0.0596842	0.278624	FALSE	FALSE	FALSE	FALSE	inactive	0.554982
chr10	102124571	102125071	chr10	100364814	100365314	STARR_ID1869	325.616	-0.263227	0.165783	-1.58778	0.112336	0.399375	TRUE	FALSE	FALSE	FALSE	constitutive	0.398619
chr10	102757966	102758647	chr10	100998209	100998890	STARR_ID1872	7775.95	0.0685605	0.104085	0.658695	0.510091	0.785412	TRUE	TRUE	FALSE	FALSE	constitutive	0.104903
chr10	102811938	102812438	chr10	101052181	101052681	STARR_ID1873	1199.78	0.0441685	0.103036	0.428668	0.668165	0.863462	TRUE	TRUE	FALSE	FALSE	constitutive	0.0637569
chr10	102825958	102826458	chr10	101066201	101066701	STARR_ID1874	2638.25	-0.120063	0.125919	-0.953493	0.34034	0.671708	TRUE	TRUE	TRUE	TRUE	constitutive	0.17282
chr10	102884113	102884584	chr10	101124356	101124827	STARR_ID1875	1307.97	0.859846	0.112978	7.61076	2.72497e-14	6.82388e-13	TRUE	TRUE	FALSE	FALSE	constitutive	12.166
chr10	103113388	103113847	chr10	101353631	101354090	STARR_ID1876	1422.97	0.000872939	0.114884	0.00759847	0.993937	0.998705	TRUE	TRUE	FALSE	FALSE	constitutive	0.00056269
chr10	103391617	103392117	chr10	101631860	101632360	STARR_ID1880	802.179	0.54088	0.0985507	5.48835	4.05709e-08	6.31254e-07	FALSE	TRUE	FALSE	FALSE	constitutive	6.1998
chr10	103724837	103725337	chr10	101965080	101965580	STARR_ID1881	168.196	-0.0755055	0.145857	-0.517667	0.604691	0.831871	FALSE	FALSE	FALSE	FALSE	inactive	0.0799438
chr10	103876800	103877737	chr10	102117043	102117980	STARR_ID1882	3160	-0.0533307	0.0754562	-0.706776	0.479705	0.765462	FALSE	FALSE	FALSE	FALSE	inactive	0.116076
chr10	103892395	103892808	chr10	102132638	102133051	STARR_ID1884	5509.91	-0.0682018	0.121198	-0.56273	0.573619	0.816706	TRUE	TRUE	TRUE	TRUE	constitutive	0.0879344
chr10	104417986	104418486	chr10	102658229	102658729	STARR_ID1888	1237.84	-0.0447455	0.124305	-0.359964	0.718874	0.88522	TRUE	TRUE	FALSE	FALSE	constitutive	0.0529487
chr10	104470429	104470929	chr10	102710672	102711172	STARR_ID1889	2849.91	2.51963	0.256631	9.81808	9.41201e-23	4.5467e-21	TRUE	TRUE	TRUE	TRUE	induced	20.3423
chr10	104529161	104529661	chr10	102769404	102769904	STARR_ID1890	546.011	0.0313417	0.111284	0.281635	0.778223	0.911219	TRUE	TRUE	FALSE	FALSE	constitutive	0.040377
chr10	104534011	104534538	chr10	102774254	102774781	STARR_ID1891	2267.94	0.450107	0.14067	3.19973	0.00137556	0.0126246	FALSE	TRUE	FALSE	FALSE	constitutive	1.89878
chr10	104559931	104560431	chr10	102800174	102800674	STARR_ID1892	442.36	0.0553183	0.101984	0.54242	0.587529	0.823004	FALSE	FALSE	FALSE	FALSE	inactive	0.0845979
chr10	104573793	104574293	chr10	102814036	102814536	STARR_ID1893	336.634	-0.185295	0.148224	-1.2501	0.211263	0.544873	TRUE	TRUE	FALSE	FALSE	constitutive	0.263705
chr10	105001205	105001705	chr10	103241448	103241948	STARR_ID1895	2706.4	-0.242934	0.222209	-1.09327	0.274276	0.612485	TRUE	TRUE	TRUE	TRUE	constitutive	0.212905
chr10	105302789	105304227	chr10	103543032	103544470	STARR_ID1897	1613.88	0.0607466	0.0696139	0.872621	0.38287	0.705601	FALSE	FALSE	FALSE	FALSE	inactive	0.151441
chr10	105308712	105309212	chr10	103548955	103549455	STARR_ID1898	2604.34	-0.103736	0.0849352	-1.22135	0.221953	0.556497	TRUE	TRUE	FALSE	FALSE	constitutive	0.254537
chr10	105549358	105549858	chr10	103789600	103790100	STARR_ID1902	513.238	0.0283667	0.109953	0.257988	0.796416	0.919022	FALSE	FALSE	FALSE	FALSE	inactive	0.0366741
chr10	105553987	105554487	chr10	103794229	103794729	STARR_ID1903	530.239	-0.243219	0.0987553	-2.46284	0.013784	0.0937217	TRUE	TRUE	FALSE	FALSE	constitutive	1.02816
chr10	105649833	105650333	chr10	103890075	103890575	STARR_ID1904	1946.27	0.0860354	0.103817	0.828722	0.407262	0.722352	TRUE	TRUE	TRUE	TRUE	constitutive	0.141251
chr10	105651927	105652427	chr10	103892169	103892669	STARR_ID1905	66.2921	0.164499	0.208102	0.790473	0.429252	0.73525	FALSE	FALSE	FALSE	FALSE	inactive	0.133565
chr10	106139434	106140089	chr10	104379676	104380331	STARR_ID1909	251.317	-0.0415698	0.165616	-0.251	0.801814	0.921277	FALSE	FALSE	FALSE	FALSE	inactive	0.0356096
chr10	106240475	106241111	chr10	104480717	104481353	STARR_ID1910	1107.33	0.976151	0.0944689	10.333	4.99521e-25	2.83438e-23	TRUE	TRUE	FALSE	TRUE	constitutive	22.5475
chr10	109370760	109371260	chr10	107611002	107611502	STARR_ID1913	238.164	-0.290213	0.174962	-1.65872	0.0971714	0.369781	TRUE	TRUE	TRUE	TRUE	constitutive	0.432056
chr10	111662701	111663078	chr10	109902943	109903320	STARR_ID1915	774.992	-0.0802432	0.13442	-0.59696	0.550534	0.807151	TRUE	TRUE	FALSE	FALSE	constitutive	0.0930451
chr10	111694895	111695395	chr10	109935137	109935637	STARR_ID1916	175.044	-0.182072	0.126702	-1.437	0.150717	0.462944	FALSE	FALSE	FALSE	FALSE	inactive	0.334471
chr10	112167936	112168436	chr10	110408178	110408678	STARR_ID1921	1166.47	-0.169165	0.0859175	-1.96892	0.0489623	0.244282	TRUE	TRUE	FALSE	FALSE	constitutive	0.612109
chr10	112190583	112191083	chr10	110430825	110431325	STARR_ID1922	802.102	0.059166	0.129957	0.455274	0.648912	0.853301	TRUE	TRUE	FALSE	FALSE	constitutive	0.0688976
chr10	112193483	112193983	chr10	110433725	110434225	STARR_ID1923	1022.03	-0.196843	0.0967771	-2.03398	0.0419532	0.220435	FALSE	FALSE	FALSE	FALSE	inactive	0.65672
chr10	112219842	112220342	chr10	110460084	110460584	STARR_ID1924	2295.66	-0.068925	0.0890132	-0.774323	0.43874	0.740502	TRUE	FALSE	FALSE	FALSE	constitutive	0.130474
chr10	112540927	112541427	chr10	110781169	110781669	STARR_ID1925	1570.99	0.065489	0.0822437	0.796279	0.42587	0.732705	TRUE	TRUE	FALSE	FALSE	constitutive	0.135071
chr10	112549580	112550080	chr10	110789822	110790322	STARR_ID1926	698.314	0.228709	0.111955	2.04287	0.0410653	0.217077	FALSE	FALSE	FALSE	FALSE	inactive	0.663386
chr10	112582390	112582890	chr10	110822632	110823132	STARR_ID1927	1781.99	1.01376	0.13211	7.67356	1.67282e-14	4.25616e-13	TRUE	TRUE	TRUE	TRUE	induced	12.371
chr10	112597040	112597390	chr10	110837282	110837632	STARR_ID1928	147.924	-0.332406	0.141346	-2.35173	0.0186865	0.119659	FALSE	FALSE	FALSE	FALSE	inactive	0.922056
chr10	112612007	112612507	chr10	110852249	110852749	STARR_ID1929	2358.53	-0.050731	0.259943	-0.195162	0.845266	0.939206	TRUE	TRUE	TRUE	TRUE	constitutive	0.0272391
chr10	112867568	112868068	chr10	111107810	111108310	STARR_ID1932	1447.26	0.979389	0.13189	7.42582	1.12083e-13	2.64468e-12	TRUE	TRUE	FALSE	TRUE	constitutive	11.5776
chr10	114571518	114572018	chr10	112811759	112812259	STARR_ID1934	632.127	-0.285357	0.0886704	-3.21817	0.0012901	0.0119176	TRUE	TRUE	TRUE	TRUE	constitutive	1.92381
chr10	114788016	114788999	chr10	113028257	113029240	STARR_ID1936	400.804	0.494097	0.12156	4.06465	4.81051e-05	0.000556968	FALSE	TRUE	FALSE	FALSE	constitutive	3.25417
chr10	115240527	115241027	chr10	113480768	113481268	STARR_ID1941	431.188	-0.23237	0.125844	-1.84649	0.0648208	0.292489	TRUE	TRUE	TRUE	TRUE	constitutive	0.53389
chr10	115681483	115682186	chr10	113921724	113922427	STARR_ID1942	301.529	0.0642394	0.105048	0.611524	0.540853	0.800948	FALSE	FALSE	FALSE	FALSE	inactive	0.0963955
chr10	115687070	115687570	chr10	113927311	113927811	STARR_ID1943	378.574	0.821143	0.121828	6.74019	1.58179e-11	3.18563e-10	TRUE	TRUE	FALSE	TRUE	constitutive	9.49681
chr10	115719166	115719666	chr10	113959407	113959907	STARR_ID1944	659.827	-0.0866815	0.125926	-0.688353	0.49123	0.772864	TRUE	TRUE	TRUE	FALSE	constitutive	0.111897
chr10	115816738	115817238	chr10	114056979	114057479	STARR_ID1945	367.329	1.21688	0.1623	7.49772	6.49382e-14	1.5685e-12	FALSE	TRUE	FALSE	FALSE	induced	11.8045
chr10	116096734	116097234	chr10	114336975	114337475	STARR_ID1947	1970.1	-0.0304352	0.088383	-0.344356	0.730579	0.890264	FALSE	FALSE	FALSE	FALSE	inactive	0.0504814
chr10	116126808	116127308	chr10	114367049	114367549	STARR_ID1948	651.223	-0.0632619	0.117659	-0.537673	0.590803	0.824464	FALSE	FALSE	FALSE	FALSE	inactive	0.0838285
chr10	116311089	116311589	chr10	114551330	114551830	STARR_ID1952	369.128	-0.257194	0.103982	-2.47343	0.0133822	0.0914249	FALSE	FALSE	FALSE	FALSE	inactive	1.03894
chr10	116484101	116484601	chr10	114724342	114724842	STARR_ID1954	155.994	-0.108333	0.13352	-0.811358	0.41716	0.728856	TRUE	TRUE	FALSE	FALSE	constitutive	0.137358
chr10	116790505	116791005	chr10	115030746	115031246	STARR_ID1956	1241.67	-0.103964	0.130774	-0.79499	0.42662	0.733642	FALSE	FALSE	FALSE	FALSE	inactive	0.134516
chr10	117840067	117840567	chr10	116080556	116081056	STARR_ID1961	1444.65	1.21494	0.195018	6.22989	4.66777e-10	8.30155e-09	TRUE	TRUE	FALSE	TRUE	induced	8.08084
chr10	117902857	117903357	chr10	116143346	116143846	STARR_ID1962	159.843	0.149039	0.147621	1.00961	0.312682	0.64831	FALSE	TRUE	FALSE	FALSE	constitutive	0.188217
chr10	118430957	118431457	chr10	116671446	116671946	STARR_ID1963	256.016	-0.146416	0.126482	-1.15761	0.247025	0.583587	FALSE	FALSE	FALSE	FALSE	inactive	0.233895
chr10	118762799	118764706	chr10	117003288	117005195	STARR_ID1965	3903.84	-0.00977123	0.0865246	-0.11293	0.910086	0.965533	TRUE	TRUE	FALSE	FALSE	constitutive	0.0152328
chr10	119024239	119024739	chr10	117264728	117265228	STARR_ID1966	851.113	-0.268299	0.134671	-1.99225	0.0463434	0.236328	TRUE	TRUE	FALSE	FALSE	constitutive	0.626484
chr10	119220678	119222164	chr10	117461167	117462653	STARR_ID1968	2706.94	-0.134788	0.103677	-1.30007	0.193577	0.524432	TRUE	TRUE	FALSE	FALSE	constitutive	0.280311
chr10	119853279	119853890	chr10	118093768	118094379	STARR_ID1973	714.409	0.611569	0.161752	3.7809	0.000156263	0.00170435	TRUE	TRUE	FALSE	FALSE	constitutive	2.76844
chr10	119876309	119877266	chr10	118116798	118117755	STARR_ID1974	920.45	0.0418878	0.183906	0.227767	0.819827	0.928164	FALSE	TRUE	FALSE	FALSE	constitutive	0.0323754
chr10	120340769	120341269	chr10	118581257	118581757	STARR_ID1979	392.391	-0.0130051	0.119847	-0.108514	0.913588	0.966942	FALSE	FALSE	FALSE	FALSE	inactive	0.0145995
chr10	120349792	120350292	chr10	118590280	118590780	STARR_ID1980	195.014	0.0205557	0.125557	0.163716	0.869954	0.951621	FALSE	FALSE	FALSE	FALSE	inactive	0.021536
chr10	120352339	120352839	chr10	118592827	118593327	STARR_ID1981	671.594	-0.0649646	0.0945841	-0.686845	0.49218	0.773372	FALSE	FALSE	FALSE	FALSE	inactive	0.111611
chr10	120384962	120385517	chr10	118625450	118626005	STARR_ID1982	1322.9	1.00257	0.153012	6.55221	5.6693e-11	1.08376e-09	TRUE	TRUE	FALSE	TRUE	induced	8.96507
chr10	120557313	120558264	chr10	118797801	118798752	STARR_ID1985	375.601	0.210816	0.12976	1.62466	0.104235	0.384042	FALSE	FALSE	FALSE	FALSE	inactive	0.415622
chr10	120604245	120605255	chr10	118844733	118845743	STARR_ID1986	520.787	-0.243469	0.13544	-1.79762	0.0722374	0.310934	FALSE	FALSE	FALSE	FALSE	inactive	0.507332
chr10	120742833	120743333	chr10	118983321	118983821	STARR_ID1988	376.947	-0.0467737	0.117993	-0.39641	0.691803	0.872436	FALSE	FALSE	FALSE	FALSE	inactive	0.0592666
chr10	120760182	120760682	chr10	119000670	119001170	STARR_ID1989	815.995	-0.0537212	0.198869	-0.270133	0.787058	0.916201	FALSE	FALSE	FALSE	FALSE	inactive	0.038009
chr10	120766303	120766803	chr10	119006791	119007291	STARR_ID1990	834.527	-0.221154	0.101951	-2.16922	0.0300663	0.172936	TRUE	TRUE	TRUE	FALSE	constitutive	0.762115
chr10	120785081	120785581	chr10	119025569	119026069	STARR_ID1991	626.936	-0.0499667	0.0962916	-0.518911	0.603823	0.83158	FALSE	FALSE	FALSE	FALSE	inactive	0.0800961
chr10	121302187	121303792	chr10	119542675	119544280	STARR_ID1995	3815.66	0.0782258	0.0936512	0.835289	0.403555	0.720144	TRUE	TRUE	FALSE	FALSE	constitutive	0.142581
chr10	121417739	121418262	chr10	119658227	119658750	STARR_ID1996	3058.21	-0.0405602	0.162465	-0.249655	0.802854	0.921867	TRUE	TRUE	FALSE	FALSE	constitutive	0.0353318
chr10	121423517	121424017	chr10	119664005	119664505	STARR_ID1997	572.304	-0.212085	0.106701	-1.98765	0.0468505	0.237944	TRUE	TRUE	FALSE	FALSE	constitutive	0.623524
chr10	121427432	121427932	chr10	119667920	119668420	STARR_ID1998	1620.68	-0.0374625	0.118816	-0.315299	0.752535	0.900184	TRUE	TRUE	FALSE	FALSE	constitutive	0.0456687
chr10	121447523	121449073	chr10	119688011	119689561	STARR_ID1999	824.683	0.991505	0.157153	6.30918	2.80521e-10	5.05823e-09	TRUE	TRUE	FALSE	TRUE	constitutive	8.296
chr10	122756133	122756633	chr10	120996620	120997120	STARR_ID2002	367.163	0.0492053	0.0999145	0.492474	0.622384	0.840463	FALSE	TRUE	FALSE	FALSE	constitutive	0.0754816
chr10	122955393	122955676	chr10	121195879	121196162	STARR_ID2006	10.0393	-0.722302	0.46361	-1.55799	0.119234	0.412817	FALSE	FALSE	FALSE	FALSE	inactive	0.384243
chr10	123005322	123005822	chr10	121245808	121246308	STARR_ID2007	488.034	-0.259001	0.102819	-2.51901	0.0117684	0.0824075	TRUE	TRUE	TRUE	FALSE	constitutive	1.08403
chr10	123269614	123270114	chr10	121510100	121510600	STARR_ID2008	721.908	-0.0937219	0.0980178	-0.956172	0.338985	0.670894	TRUE	TRUE	FALSE	FALSE	constitutive	0.173346
chr10	123273948	123274357	chr10	121514434	121514843	STARR_ID2009	198.475	-0.442353	0.15014	-2.94627	0.00321628	0.0268788	FALSE	FALSE	FALSE	FALSE	inactive	1.57059
chr10	123312985	123313429	chr10	121553471	121553915	STARR_ID2011	153.356	-0.0608701	0.172383	-0.35311	0.724006	0.887346	TRUE	TRUE	FALSE	FALSE	constitutive	0.0519072
chr10	123349366	123350045	chr10	121589852	121590531	STARR_ID2014	222.193	0.017679	0.150278	0.117642	0.906351	0.964317	FALSE	FALSE	FALSE	FALSE	inactive	0.0157803
chr10	123754195	123754695	chr10	121994680	121995180	STARR_ID2015	299.478	-0.320502	0.133208	-2.40603	0.016127	0.107056	FALSE	FALSE	FALSE	FALSE	inactive	0.970388
chr10	123802292	123802792	chr10	122042777	122043277	STARR_ID2017	132.183	0.207533	0.156541	1.32574	0.184926	0.513712	FALSE	FALSE	FALSE	FALSE	inactive	0.28928
chr10	123822695	123823195	chr10	122063180	122063680	STARR_ID2019	1552.28	-0.239181	0.157908	-1.51469	0.129852	0.43188	TRUE	TRUE	TRUE	TRUE	constitutive	0.364637
chr10	124779682	124780182	chr10	123020166	123020666	STARR_ID2023	98.2478	-0.188039	0.176861	-1.0632	0.287689	0.625187	FALSE	FALSE	FALSE	FALSE	inactive	0.20399
chr10	124963308	124963808	chr10	123203792	123204292	STARR_ID2024	342.36	-0.00187015	0.102011	-0.0183329	0.985373	0.995609	TRUE	TRUE	TRUE	TRUE	constitutive	0.00191136
chr10	124987236	124987736	chr10	123227720	123228220	STARR_ID2025	195.804	0.158141	0.120131	1.3164	0.18804	0.517638	TRUE	TRUE	FALSE	FALSE	constitutive	0.285974
chr10	125396353	125396853	chr10	123636837	123637337	STARR_ID2028	963.414	0.547855	0.130301	4.20454	2.61613e-05	0.000311215	TRUE	TRUE	FALSE	TRUE	constitutive	3.50694
chr10	125503436	125503936	chr10	123743920	123744420	STARR_ID2029	1500.63	0.229652	0.113604	2.02152	0.0432265	0.224599	TRUE	TRUE	FALSE	TRUE	constitutive	0.648593
chr10	125558612	125559112	chr10	123799096	123799596	STARR_ID2030	221.025	0.138864	0.128177	1.08338	0.27864	0.617233	FALSE	FALSE	FALSE	FALSE	inactive	0.209551
chr10	125795503	125796003	chr10	124035987	124036487	STARR_ID2032	4002.47	-0.251313	0.140547	-1.78811	0.0737589	0.313892	TRUE	TRUE	TRUE	TRUE	constitutive	0.503219
chr10	125852889	125853389	chr10	124093373	124093873	STARR_ID2033	4768.55	0.252618	0.186582	1.35393	0.17576	0.499342	TRUE	TRUE	FALSE	FALSE	constitutive	0.301602
chr10	126349125	126349625	chr10	124660556	124661056	STARR_ID2038	574.09	0.146005	0.098833	1.47729	0.139597	0.446853	FALSE	FALSE	FALSE	FALSE	inactive	0.349835
chr10	126354125	126354625	chr10	124665556	124666056	STARR_ID2039	1775.61	0.0818656	0.0660535	1.23938	0.215204	0.549107	TRUE	TRUE	FALSE	FALSE	constitutive	0.260343
chr10	126379488	126379988	chr10	124690919	124691419	STARR_ID2040	81.4816	-0.215402	0.229415	-0.938919	0.347772	0.677151	FALSE	FALSE	FALSE	FALSE	inactive	0.169315
chr10	126381981	126382481	chr10	124693412	124693912	STARR_ID2041	967.295	-0.226503	0.104548	-2.16651	0.0302725	0.173982	FALSE	FALSE	FALSE	FALSE	inactive	0.759496
chr10	126712681	126713181	chr10	125024112	125024612	STARR_ID2043	398.549	-0.149094	0.117957	-1.26397	0.206242	0.539984	FALSE	FALSE	FALSE	FALSE	inactive	0.267619
chr10	126751863	126753732	chr10	125063294	125065163	STARR_ID2044	1115.1	-0.149547	0.13251	-1.12857	0.259078	0.596862	FALSE	FALSE	FALSE	FALSE	inactive	0.224126
chr10	126773308	126774804	chr10	125084739	125086235	STARR_ID2045	2926.32	-0.119357	0.079507	-1.50121	0.133301	0.436567	TRUE	TRUE	FALSE	FALSE	constitutive	0.359949
chr10	126812268	126812768	chr10	125123699	125124199	STARR_ID2046	1025.54	0.357713	0.140125	2.5528	0.010686	0.0765907	TRUE	TRUE	TRUE	TRUE	constitutive	1.11582
chr10	127227432	127227932	chr10	125538863	125539363	STARR_ID2047	417.388	-0.0611867	0.120744	-0.506747	0.612333	0.835343	FALSE	FALSE	FALSE	FALSE	inactive	0.0781352
chr10	127232264	127232764	chr10	125543695	125544195	STARR_ID2048	1194.33	-0.0162288	0.111452	-0.145613	0.884227	0.956107	TRUE	FALSE	FALSE	FALSE	constitutive	0.0194933
chr10	127273507	127274007	chr10	125584938	125585438	STARR_ID2049	567.895	-0.076284	0.125868	-0.606065	0.544472	0.803861	TRUE	TRUE	TRUE	FALSE	constitutive	0.0948193
chr10	127280362	127280862	chr10	125591793	125592293	STARR_ID2050	133.916	-0.219822	0.138515	-1.58699	0.112515	0.399857	TRUE	FALSE	FALSE	FALSE	constitutive	0.398096
chr10	127313046	127314806	chr10	125624477	125626237	STARR_ID2051	4707.61	1.06538	0.14113	7.54893	4.38852e-14	1.0782e-12	TRUE	TRUE	FALSE	TRUE	induced	11.9673
chr10	127525230	127525730	chr10	125836661	125837161	STARR_ID2053	179.459	-0.20683	0.158134	-1.30794	0.190892	0.521347	FALSE	FALSE	FALSE	FALSE	inactive	0.282873
chr10	127529481	127529981	chr10	125840912	125841412	STARR_ID2054	216.465	-0.193094	0.129211	-1.49441	0.13507	0.439745	TRUE	FALSE	FALSE	FALSE	constitutive	0.356799
chr10	127751083	127751559	chr10	126062514	126062990	STARR_ID2058	1521.26	0.0119346	0.235981	0.0505742	0.959665	0.98631	TRUE	TRUE	TRUE	TRUE	constitutive	0.00598647
chr10	128590706	128591206	chr10	126902137	126902637	STARR_ID2061	598.666	-0.155208	0.0787963	-1.96974	0.048868	0.243982	TRUE	TRUE	FALSE	FALSE	constitutive	0.612643
chr10	128606717	128607383	chr10	126918148	126918814	STARR_ID2062	8204.99	0.762195	0.111267	6.85013	7.37834e-12	1.53347e-10	TRUE	TRUE	FALSE	TRUE	constitutive	9.81432
chr10	128810922	128811422	chr10	127012658	127013158	STARR_ID2063	515.654	0.0672357	0.101522	0.662276	0.507794	0.784204	FALSE	FALSE	FALSE	FALSE	inactive	0.105571
chr10	129077617	129078117	chr10	127279353	127279853	STARR_ID2064	120.646	-0.143331	0.212846	-0.673402	0.500692	0.779296	FALSE	FALSE	FALSE	FALSE	inactive	0.108298
chr10	129127289	129127789	chr10	127329025	127329525	STARR_ID2065	13473.2	2.8465	0.263485	10.8033	3.32152e-27	2.25092e-25	TRUE	TRUE	TRUE	TRUE	induced	24.6476
chr10	129706889	129707389	chr10	127908625	127909125	STARR_ID2068	1670.37	0.335273	0.105732	3.17096	0.00151935	0.0138553	TRUE	TRUE	TRUE	TRUE	constitutive	1.85838
chr10	129743619	129744119	chr10	127945355	127945855	STARR_ID2069	434.2	0.0716215	0.144651	0.495133	0.620507	0.839813	TRUE	TRUE	FALSE	FALSE	constitutive	0.0758175
chr10	129805269	129805769	chr10	128007005	128007505	STARR_ID2070	75.4193	-0.234573	0.202423	-1.15883	0.246527	0.582757	TRUE	TRUE	FALSE	FALSE	constitutive	0.234513
chr10	131508237	131508737	chr10	129709973	129710473	STARR_ID2073	1372.86	-0.0585623	0.108224	-0.541121	0.588424	0.823598	FALSE	FALSE	FALSE	FALSE	inactive	0.0842848
chr10	133478249	133478749	chr10	131645913	131646413	STARR_ID2075	1573.56	0.206838	0.085019	2.43284	0.0149807	0.100521	TRUE	TRUE	FALSE	FALSE	constitutive	0.997744
chr10	133487283	133487783	chr10	131654947	131655447	STARR_ID2076	3474.54	0.0139155	0.17249	0.0806742	0.935701	0.976327	TRUE	TRUE	TRUE	TRUE	constitutive	0.0104047
chr10	133811138	133811638	chr10	131997634	131998134	STARR_ID2078	941.581	-0.119787	0.185284	-0.646502	0.517954	0.789324	TRUE	TRUE	FALSE	FALSE	constitutive	0.102745
chr10	133976759	133978572	chr10	132163255	132165068	STARR_ID2080	3942.27	0.13061	0.0802651	1.62723	0.103687	0.382916	FALSE	TRUE	FALSE	FALSE	constitutive	0.416897
chr10	134079054	134079554	chr10	132265550	132266050	STARR_ID2081	2549.83	-0.12441	0.095052	-1.30886	0.190581	0.520955	TRUE	TRUE	FALSE	FALSE	constitutive	0.2832
chr10	134221060	134221560	chr10	132407556	132408056	STARR_ID2083	12699.9	-0.17746	0.142062	-1.24917	0.211602	0.544876	TRUE	TRUE	TRUE	TRUE	constitutive	0.263702
chr10	134234393	134235421	chr10	132420889	132421917	STARR_ID2084	4524.43	-0.127911	0.124521	-1.02722	0.304315	0.641137	TRUE	TRUE	FALSE	FALSE	constitutive	0.193049
chr10	134282664	134283164	chr10	132469160	132469660	STARR_ID2085	931.451	0.104911	0.104391	1.00498	0.314908	0.651268	TRUE	TRUE	FALSE	FALSE	constitutive	0.18624
chr10	134293689	134294189	chr10	132480185	132480685	STARR_ID2086	1217.88	-0.0950127	0.0809849	-1.17322	0.24071	0.576727	TRUE	FALSE	FALSE	FALSE	constitutive	0.23903
chr10	134330514	134331020	chr10	132517010	132517516	STARR_ID2090	10277.9	-0.366135	0.155441	-2.35545	0.0185002	0.118625	TRUE	TRUE	TRUE	TRUE	constitutive	0.925822
chr10	134352883	134353383	chr10	132539379	132539879	STARR_ID2091	535.314	-0.103541	0.0911224	-1.13628	0.255838	0.592714	FALSE	FALSE	FALSE	FALSE	inactive	0.227155
chr10	134577876	134578376	chr10	132764372	132764872	STARR_ID2095	12685.9	0.107246	0.115357	0.929683	0.352535	0.68162	FALSE	FALSE	FALSE	FALSE	inactive	0.166458
chr10	134813412	134813919	chr10	132999908	133000415	STARR_ID2097	1801.95	0.417005	0.106575	3.91277	9.12435e-05	0.00102409	TRUE	TRUE	FALSE	FALSE	constitutive	2.98966
chr10	135092080	135092580	chr10	133278576	133279076	STARR_ID2099	3223.19	0.132563	0.0922531	1.43695	0.150731	0.462944	TRUE	TRUE	FALSE	FALSE	constitutive	0.334471
chr11	449903	450260	chr11	449903	450260	STARR_ID2103	27686.8	0.120878	0.11568	1.04494	0.296053	0.633617	TRUE	TRUE	TRUE	TRUE	constitutive	0.198173
chr11	469957	470458	chr11	469957	470458	STARR_ID2104	3783.42	0.72205	0.0975977	7.39823	1.38007e-13	3.24033e-12	FALSE	TRUE	FALSE	FALSE	constitutive	11.4894
chr11	564134	564634	chr11	564134	564634	STARR_ID2106	2708.21	-0.0973714	0.0646719	-1.50562	0.132165	0.435411	TRUE	TRUE	FALSE	FALSE	constitutive	0.361101
chr11	704717	705217	chr11	704717	705217	STARR_ID2107	3488.63	-0.00287504	0.101889	-0.0282174	0.977489	0.992904	TRUE	TRUE	FALSE	FALSE	constitutive	0.00309268
chr11	986583	987083	chr11	986583	987083	STARR_ID2112	4777.59	-0.0376853	0.0791332	-0.476227	0.633913	0.84576	TRUE	TRUE	FALSE	FALSE	constitutive	0.0727529
chr11	1275431	1275931	chr11	1254201	1254701	STARR_ID2114	4856.31	0.17083	0.104689	1.63179	0.102723	0.381418	TRUE	TRUE	FALSE	FALSE	constitutive	0.418599
chr11	1507157	1507657	chr11	1485927	1486427	STARR_ID2117	11889.7	1.12618	0.0887093	12.6951	6.29279e-37	1.0586e-34	TRUE	TRUE	FALSE	TRUE	induced	33.9753
chr11	1515850	1516350	chr11	1494620	1495120	STARR_ID2118	366.291	0.00207786	0.108402	0.0191681	0.984707	0.995323	FALSE	FALSE	FALSE	FALSE	inactive	0.00203596
chr11	1580452	1580952	chr11	1559222	1559722	STARR_ID2120	16685.8	-0.335479	0.176895	-1.89648	0.0578965	0.273222	TRUE	TRUE	TRUE	TRUE	constitutive	0.563485
chr11	1726691	1727191	chr11	1705461	1705961	STARR_ID2121	625.021	-0.184399	0.0830102	-2.22141	0.0263234	0.157423	TRUE	TRUE	TRUE	TRUE	constitutive	0.802932
chr11	1777178	1777678	chr11	1755948	1756448	STARR_ID2122	2184.29	-0.235515	0.115795	-2.03389	0.0419626	0.220435	FALSE	FALSE	FALSE	FALSE	inactive	0.65672
chr11	1793758	1794258	chr11	1772528	1773028	STARR_ID2123	7397.62	0.96769	0.149657	6.46605	1.00597e-10	1.87785e-09	TRUE	TRUE	TRUE	TRUE	constitutive	8.72634
chr11	1804108	1804608	chr11	1782878	1783378	STARR_ID2124	739.723	-0.0707745	0.0909243	-0.778389	0.436339	0.738194	FALSE	FALSE	FALSE	FALSE	inactive	0.131829
chr11	1817753	1818313	chr11	1796523	1797083	STARR_ID2125	2338.53	0.732892	0.0860297	8.51906	1.60855e-17	5.2875e-16	TRUE	TRUE	FALSE	FALSE	constitutive	15.2767
chr11	1848378	1850134	chr11	1827148	1828904	STARR_ID2126	7126.7	-0.120482	0.074217	-1.62337	0.10451	0.384693	TRUE	FALSE	FALSE	FALSE	constitutive	0.414886
chr11	2214471	2214971	chr11	2193241	2193741	STARR_ID2133	6356.85	1.40716	0.102233	13.7642	4.18259e-43	1.17268e-40	TRUE	TRUE	FALSE	TRUE	induced	39.9308
chr11	2223216	2224298	chr11	2201986	2203068	STARR_ID2134	23382	-0.210491	0.127271	-1.65388	0.098152	0.37174	TRUE	TRUE	TRUE	TRUE	constitutive	0.429761
chr11	2278328	2278828	chr11	2257098	2257598	STARR_ID2137	11822.8	-0.151137	0.242677	-0.622792	0.533421	0.796594	TRUE	TRUE	TRUE	TRUE	constitutive	0.0987631
chr11	2346882	2347382	chr11	2325652	2326152	STARR_ID2138	230.115	-0.0488802	0.120255	-0.406469	0.684398	0.870272	FALSE	FALSE	FALSE	FALSE	inactive	0.0603452
chr11	2421252	2422239	chr11	2400022	2401009	STARR_ID2139	55137.7	-0.0801805	0.131037	-0.611894	0.540608	0.800948	TRUE	TRUE	TRUE	TRUE	constitutive	0.0963955
chr11	2504815	2505167	chr11	2483585	2483937	STARR_ID2140	1373.14	0.835586	0.130722	6.39206	1.63662e-10	2.99259e-09	FALSE	TRUE	FALSE	FALSE	constitutive	8.52395
chr11	2933733	2934233	chr11	2912503	2913003	STARR_ID2141	7279.68	-0.0451186	0.163741	-0.275548	0.782895	0.913538	TRUE	TRUE	TRUE	TRUE	constitutive	0.0392733
chr11	3021662	3022162	chr11	3000432	3000932	STARR_ID2145	2089.37	-0.158521	0.106696	-1.48573	0.137351	0.443137	TRUE	FALSE	FALSE	FALSE	constitutive	0.353462
chr11	3031908	3032526	chr11	3010678	3011296	STARR_ID2146	11210.8	0.105578	0.114655	0.920835	0.357137	0.684544	TRUE	TRUE	FALSE	FALSE	constitutive	0.164599
chr11	3064883	3065383	chr11	3043653	3044153	STARR_ID2149	2714.68	-0.0335176	0.0754698	-0.444119	0.656956	0.856944	TRUE	TRUE	FALSE	FALSE	constitutive	0.0670476
chr11	3236550	3237050	chr11	3215320	3215820	STARR_ID2153	3414	0.710128	0.118222	6.00672	1.8931e-09	3.26926e-08	TRUE	TRUE	FALSE	FALSE	constitutive	7.48555
chr11	3361370	3361725	chr11	3340140	3340495	STARR_ID2154	615.651	0.419414	0.134255	3.12401	0.00178403	0.0159836	TRUE	TRUE	TRUE	TRUE	constitutive	1.79632
chr11	3434999	3435499	chr11	3413769	3414269	STARR_ID2155	19082.6	0.93471	0.146752	6.36934	1.89848e-10	3.45813e-09	TRUE	TRUE	TRUE	TRUE	constitutive	8.46116
chr11	3914383	3914883	chr11	3893153	3893653	STARR_ID2160	170.792	-0.236204	0.147133	-1.60537	0.108412	0.390758	FALSE	FALSE	FALSE	FALSE	inactive	0.408092
chr11	3916207	3916707	chr11	3894977	3895477	STARR_ID2161	198.291	-0.0740582	0.151972	-0.487316	0.626035	0.842077	FALSE	FALSE	FALSE	FALSE	inactive	0.0746483
chr11	6336901	6337401	chr11	6315671	6316171	STARR_ID2163	572.385	0.190109	0.10803	1.75978	0.0784444	0.326901	FALSE	FALSE	FALSE	FALSE	inactive	0.485583
chr11	6659258	6659758	chr11	6638027	6638527	STARR_ID2165	1586.77	-0.0338693	0.0979404	-0.345816	0.729481	0.889929	TRUE	FALSE	FALSE	FALSE	constitutive	0.0506449
chr11	7618832	7619332	chr11	7597601	7598101	STARR_ID2167	735.904	-0.0266234	0.207357	-0.128394	0.897837	0.962815	TRUE	TRUE	FALSE	FALSE	constitutive	0.0164571
chr11	7621487	7621987	chr11	7600256	7600756	STARR_ID2168	1335.26	-0.0161957	0.240801	-0.0672575	0.946377	0.981024	TRUE	TRUE	FALSE	FALSE	constitutive	0.00832027
chr11	8710253	8710753	chr11	8688706	8689206	STARR_ID2171	5565.24	-0.0328347	0.14321	-0.229276	0.818654	0.927916	TRUE	TRUE	TRUE	TRUE	constitutive	0.0324911
chr11	9098171	9098671	chr11	9076624	9077124	STARR_ID2174	403.639	-0.156014	0.120373	-1.29608	0.194946	0.525858	FALSE	FALSE	FALSE	FALSE	inactive	0.279132
chr11	9105515	9106015	chr11	9083968	9084468	STARR_ID2175	1079.24	0.727738	0.126447	5.7553	8.649e-09	1.4134e-07	TRUE	TRUE	TRUE	TRUE	constitutive	6.84974
chr11	9110581	9111081	chr11	9089034	9089534	STARR_ID2176	446.447	-0.175858	0.119714	-1.46898	0.141837	0.450195	FALSE	FALSE	FALSE	FALSE	inactive	0.346599
chr11	9131527	9132027	chr11	9109980	9110480	STARR_ID2177	167.986	0.349778	0.18046	1.93826	0.0525914	0.256082	FALSE	FALSE	FALSE	FALSE	inactive	0.59162
chr11	9590450	9590950	chr11	9568903	9569403	STARR_ID2179	259.602	-0.168247	0.119789	-1.40453	0.160161	0.476187	TRUE	TRUE	FALSE	FALSE	constitutive	0.322223
chr11	9918250	9919023	chr11	9896703	9897476	STARR_ID2182	365.525	0.430146	0.133636	3.21878	0.00128737	0.0119069	FALSE	FALSE	FALSE	FALSE	inactive	1.9242
chr11	10416312	10416812	chr11	10394765	10395265	STARR_ID2186	298.173	-0.0333099	0.115569	-0.288225	0.773175	0.909179	TRUE	TRUE	FALSE	FALSE	constitutive	0.0413504
chr11	10511948	10512895	chr11	10490401	10491348	STARR_ID2187	11771	0.877834	0.161864	5.42327	5.85188e-08	8.97811e-07	TRUE	TRUE	TRUE	TRUE	constitutive	6.04682
chr11	10764101	10764797	chr11	10742554	10743250	STARR_ID2190	188.886	0.212602	0.16612	1.27981	0.200612	0.532296	FALSE	FALSE	FALSE	FALSE	inactive	0.273847
chr11	11476211	11476711	chr11	11454664	11455164	STARR_ID2193	317.36	0.381426	0.116482	3.27455	0.00105832	0.00994928	TRUE	TRUE	FALSE	FALSE	constitutive	2.00221
chr11	11990609	11990999	chr11	11969062	11969452	STARR_ID2197	1330.54	0.546416	0.0948383	5.76156	8.3342e-09	1.36821e-07	TRUE	TRUE	FALSE	TRUE	constitutive	6.86385
chr11	12267111	12267611	chr11	12245564	12246064	STARR_ID2204	899.556	-0.0922842	0.0867912	-1.06329	0.287651	0.625187	FALSE	FALSE	FALSE	FALSE	inactive	0.20399
chr11	12269819	12271658	chr11	12248272	12250111	STARR_ID2205	3485.35	0.199188	0.0696961	2.85796	0.00426379	0.0347593	TRUE	TRUE	TRUE	TRUE	constitutive	1.45893
chr11	12790240	12790600	chr11	12768693	12769053	STARR_ID2208	296.941	-0.0662942	0.13993	-0.473766	0.635667	0.8469	FALSE	FALSE	FALSE	FALSE	inactive	0.0721681
chr11	12849437	12851202	chr11	12827890	12829655	STARR_ID2209	733.494	-0.0395314	0.0916747	-0.431214	0.666313	0.862598	FALSE	FALSE	FALSE	FALSE	inactive	0.0641917
chr11	13064467	13064967	chr11	13042920	13043420	STARR_ID2210	228.058	-0.0889931	0.122428	-0.726902	0.467286	0.75811	FALSE	FALSE	FALSE	FALSE	inactive	0.120268
chr11	13356715	13357321	chr11	13335168	13335774	STARR_ID2214	631.561	0.215447	0.1349	1.59708	0.110248	0.394194	FALSE	FALSE	FALSE	FALSE	inactive	0.40429
chr11	13894812	13895312	chr11	13873265	13873765	STARR_ID2216	329.823	0.0906341	0.119299	0.759719	0.447422	0.745006	FALSE	FALSE	FALSE	FALSE	inactive	0.12784
chr11	15280088	15280463	chr11	15258542	15258917	STARR_ID2220	284.586	-0.0217101	0.162194	-0.133852	0.893519	0.961336	FALSE	FALSE	FALSE	FALSE	inactive	0.0171249
chr11	15515525	15516025	chr11	15493979	15494479	STARR_ID2221	267.001	-0.0153597	0.126735	-0.121196	0.903536	0.964317	FALSE	FALSE	FALSE	FALSE	inactive	0.0157803
chr11	15529106	15529606	chr11	15507560	15508060	STARR_ID2222	1036.6	-0.288884	0.128015	-2.25664	0.0240304	0.146905	TRUE	TRUE	TRUE	TRUE	constitutive	0.832963
chr11	15636979	15637479	chr11	15615433	15615933	STARR_ID2223	709.197	0.441441	0.124896	3.53447	0.000408591	0.00414651	FALSE	FALSE	FALSE	FALSE	inactive	2.38232
chr11	15640125	15640625	chr11	15618579	15619079	STARR_ID2224	706.945	-0.269703	0.0991306	-2.72068	0.0065147	0.0500826	TRUE	TRUE	FALSE	FALSE	constitutive	1.30031
chr11	15923283	15925283	chr11	15901737	15903737	STARR_ID2227	1935.29	0.829979	0.118706	6.99188	2.71232e-12	5.90311e-11	TRUE	TRUE	FALSE	TRUE	constitutive	10.2289
chr11	16805019	16805519	chr11	16783472	16783972	STARR_ID2231	4473.94	1.0061	0.131379	7.65805	1.88778e-14	4.76914e-13	TRUE	TRUE	FALSE	TRUE	induced	12.3216
chr11	17008353	17009090	chr11	16986806	16987543	STARR_ID2232	788.445	-0.141077	0.0959212	-1.47076	0.141356	0.44982	FALSE	FALSE	FALSE	FALSE	inactive	0.346961
chr11	17010910	17011410	chr11	16989363	16989863	STARR_ID2233	461.531	0.0784999	0.108028	0.726659	0.467435	0.75811	FALSE	FALSE	FALSE	FALSE	inactive	0.120268
chr11	17034458	17034958	chr11	17012911	17013411	STARR_ID2234	2239.04	-0.20399	0.0644253	-3.16631	0.00154385	0.0140608	TRUE	TRUE	TRUE	TRUE	constitutive	1.85199
chr11	17259903	17261328	chr11	17238356	17239781	STARR_ID2235	735.549	0.000201171	0.0882211	0.0022803	0.998181	0.999813	FALSE	FALSE	FALSE	FALSE	inactive	8.12756e-05
chr11	17294396	17294896	chr11	17272849	17273349	STARR_ID2236	405.61	-0.0770384	0.095193	-0.809286	0.418351	0.729245	FALSE	FALSE	FALSE	FALSE	inactive	0.137127
chr11	17427225	17427725	chr11	17405678	17406178	STARR_ID2238	859.647	0.148314	0.120169	1.23422	0.217122	0.551052	TRUE	TRUE	FALSE	FALSE	constitutive	0.258808
chr11	17435141	17435641	chr11	17413594	17414094	STARR_ID2239	800.818	-0.108689	0.085861	-1.26587	0.20556	0.539426	FALSE	FALSE	FALSE	FALSE	inactive	0.268068
chr11	17791462	17791962	chr11	17769915	17770415	STARR_ID2242	4963.59	1.36911	0.123843	11.0553	2.06747e-28	1.53175e-26	TRUE	TRUE	FALSE	TRUE	induced	25.8148
chr11	17946278	17946778	chr11	17924731	17925231	STARR_ID2243	320.013	-0.000635274	0.112836	-0.00563005	0.995508	0.999074	FALSE	FALSE	FALSE	FALSE	inactive	0.000402448
chr11	18084658	18085158	chr11	18063111	18063611	STARR_ID2245	140.39	-0.289106	0.207797	-1.39129	0.164136	0.480554	FALSE	FALSE	FALSE	FALSE	inactive	0.318258
chr11	19049740	19050240	chr11	19028193	19028693	STARR_ID2250	356.882	-0.0304407	0.13643	-0.223122	0.82344	0.929678	FALSE	FALSE	FALSE	FALSE	inactive	0.0316673
chr11	19629103	19629603	chr11	19607557	19608057	STARR_ID2252	348.435	0.15101	0.0885599	1.70517	0.088162	0.350077	FALSE	FALSE	FALSE	FALSE	inactive	0.455836
chr11	19817907	19818407	chr11	19796361	19796861	STARR_ID2254	2057.6	0.531862	0.114908	4.62859	3.6817e-06	4.7946e-05	TRUE	TRUE	FALSE	FALSE	constitutive	4.31925
chr11	19940726	19941226	chr11	19919180	19919680	STARR_ID2255	471.899	0.0697818	0.0948137	0.735988	0.461738	0.754597	TRUE	TRUE	FALSE	FALSE	constitutive	0.122285
chr11	20016562	20017062	chr11	19995016	19995516	STARR_ID2256	897.012	0.261524	0.104666	2.49864	0.012467	0.0865104	TRUE	TRUE	FALSE	FALSE	constitutive	1.06293
chr11	20057526	20058447	chr11	20035980	20036901	STARR_ID2257	1152.28	0.148166	0.0724669	2.0446	0.0408945	0.216303	FALSE	FALSE	FALSE	FALSE	inactive	0.664938
chr11	20066687	20067187	chr11	20045141	20045641	STARR_ID2258	1899.63	-0.185597	0.0780328	-2.37845	0.0173857	0.113411	TRUE	TRUE	FALSE	FALSE	constitutive	0.945344
chr11	20091958	20092458	chr11	20070412	20070912	STARR_ID2259	221.649	-0.0447209	0.113749	-0.393155	0.694205	0.873384	FALSE	FALSE	FALSE	FALSE	inactive	0.0587949
chr11	27195403	27195903	chr11	27173856	27174356	STARR_ID2260	189.564	-0.152574	0.15214	-1.00285	0.315934	0.651352	FALSE	FALSE	FALSE	FALSE	inactive	0.186184
chr11	28364740	28365054	chr11	28343193	28343507	STARR_ID2264	281.984	-0.26498	0.248878	-1.0647	0.287013	0.624707	TRUE	TRUE	TRUE	TRUE	constitutive	0.204323
chr11	30416751	30417230	chr11	30395204	30395683	STARR_ID2265	114.538	1.42268	0.245656	5.79136	6.98176e-09	1.1568e-07	FALSE	TRUE	FALSE	FALSE	induced	6.93674
chr11	30443831	30444997	chr11	30422284	30423450	STARR_ID2266	1032.59	-0.118422	0.108106	-1.09543	0.273327	0.611245	FALSE	FALSE	FALSE	FALSE	inactive	0.213784
chr11	30460114	30460614	chr11	30438567	30439067	STARR_ID2267	143.926	-0.0994972	0.152333	-0.653155	0.513656	0.786631	FALSE	FALSE	FALSE	FALSE	inactive	0.104229
chr11	30510063	30510555	chr11	30488516	30489008	STARR_ID2269	130.676	0.36724	0.221026	1.66152	0.0966081	0.368964	FALSE	FALSE	FALSE	FALSE	inactive	0.433016
chr11	30543046	30543667	chr11	30521499	30522120	STARR_ID2270	3502.82	2.16924	0.182907	11.8598	1.91375e-32	2.08891e-30	TRUE	TRUE	TRUE	TRUE	induced	29.6801
chr11	33711729	33713064	chr11	33690183	33691518	STARR_ID2277	891.618	-0.0659636	0.104412	-0.631763	0.527542	0.793868	TRUE	TRUE	FALSE	FALSE	constitutive	0.100251
chr11	34296150	34296650	chr11	34274603	34275103	STARR_ID2279	1153.46	-0.134223	0.104456	-1.28497	0.198803	0.530139	TRUE	TRUE	TRUE	TRUE	constitutive	0.27561
chr11	34344717	34345272	chr11	34323170	34323725	STARR_ID2280	243.945	-0.145253	0.11163	-1.3012	0.19319	0.524179	FALSE	FALSE	FALSE	FALSE	inactive	0.28052
chr11	34455402	34455902	chr11	34433855	34434355	STARR_ID2281	897.198	-0.142396	0.0932476	-1.52707	0.126743	0.427118	FALSE	FALSE	FALSE	FALSE	inactive	0.369452
chr11	34559140	34559640	chr11	34537593	34538093	STARR_ID2282	286.729	0.00719771	0.114738	0.0627316	0.94998	0.982622	TRUE	TRUE	FALSE	FALSE	constitutive	0.00761349
chr11	34592133	34592633	chr11	34570586	34571086	STARR_ID2283	583.475	-0.120968	0.0855407	-1.41415	0.157317	0.472777	TRUE	TRUE	FALSE	FALSE	constitutive	0.325343
chr11	34653269	34654507	chr11	34631722	34632960	STARR_ID2286	1218.02	-0.1488	0.0737607	-2.01734	0.0436601	0.226194	TRUE	FALSE	FALSE	FALSE	constitutive	0.645519
chr11	34661638	34662138	chr11	34640091	34640591	STARR_ID2287	379.69	-0.236104	0.131112	-1.80078	0.0717374	0.30973	TRUE	TRUE	FALSE	FALSE	constitutive	0.509016
chr11	34675381	34676880	chr11	34653834	34655333	STARR_ID2288	1003.82	-0.0817915	0.0805818	-1.01501	0.3101	0.645571	TRUE	TRUE	FALSE	FALSE	constitutive	0.190056
chr11	34686819	34687319	chr11	34665272	34665772	STARR_ID2289	309.203	-0.146535	0.11402	-1.28517	0.198734	0.530139	FALSE	FALSE	FALSE	FALSE	inactive	0.27561
chr11	34689674	34690174	chr11	34668127	34668627	STARR_ID2290	352.633	0.0454416	0.113848	0.399143	0.689788	0.872035	FALSE	FALSE	FALSE	FALSE	inactive	0.0594659
chr11	35030559	35031911	chr11	35009012	35010364	STARR_ID2298	1690.68	-0.00161572	0.0805061	-0.0200695	0.983988	0.995323	FALSE	FALSE	FALSE	FALSE	inactive	0.00203596
chr11	35119520	35119788	chr11	35097973	35098241	STARR_ID2301	92.3286	0.145279	0.189383	0.767117	0.443012	0.742803	FALSE	FALSE	FALSE	FALSE	inactive	0.129126
chr11	35285797	35286297	chr11	35264250	35264750	STARR_ID2303	477.722	0.417334	0.154048	2.70912	0.00674619	0.0517509	FALSE	TRUE	FALSE	FALSE	constitutive	1.28608
chr11	35296808	35297440	chr11	35275261	35275893	STARR_ID2304	507.18	-0.118908	0.0983103	-1.20952	0.226464	0.561701	FALSE	FALSE	FALSE	FALSE	inactive	0.250495
chr11	35317306	35317806	chr11	35295759	35296259	STARR_ID2305	686.257	-0.0655206	0.108153	-0.605814	0.544638	0.803861	TRUE	TRUE	FALSE	FALSE	constitutive	0.0948193
chr11	35343984	35344484	chr11	35322437	35322937	STARR_ID2306	694.194	-0.124712	0.223105	-0.558982	0.576174	0.818754	TRUE	FALSE	FALSE	FALSE	constitutive	0.0868464
chr11	35385519	35386019	chr11	35363972	35364472	STARR_ID2307	505.835	-0.107126	0.156592	-0.68411	0.493906	0.774466	FALSE	FALSE	FALSE	FALSE	inactive	0.110997
chr11	35387295	35387930	chr11	35365748	35366383	STARR_ID2308	1682.78	0.591424	0.107564	5.49836	3.83346e-08	5.9711e-07	FALSE	TRUE	FALSE	FALSE	constitutive	6.22395
chr11	35411325	35413086	chr11	35389778	35391539	STARR_ID2309	3017.02	0.420019	0.118365	3.54851	0.00038742	0.00395412	TRUE	TRUE	TRUE	TRUE	constitutive	2.40295
chr11	35575286	35575949	chr11	35553738	35554401	STARR_ID2310	699.844	0.167616	0.098567	1.70053	0.0890315	0.352649	FALSE	FALSE	FALSE	FALSE	inactive	0.452658
chr11	35831497	35831997	chr11	35809947	35810447	STARR_ID2311	193.72	-0.110324	0.152446	-0.723691	0.469256	0.759448	FALSE	FALSE	FALSE	FALSE	inactive	0.119502
chr11	35929537	35930037	chr11	35907987	35908487	STARR_ID2312	181.576	0.180623	0.239832	0.753123	0.451376	0.746974	FALSE	FALSE	FALSE	FALSE	inactive	0.126695
chr11	35936332	35936832	chr11	35914782	35915282	STARR_ID2313	345.226	-0.151818	0.127409	-1.19158	0.233425	0.568722	FALSE	FALSE	FALSE	FALSE	inactive	0.2451
chr11	35971537	35973569	chr11	35949987	35952019	STARR_ID2314	785.162	0.559455	0.0974509	5.74088	9.41834e-09	1.53211e-07	FALSE	TRUE	FALSE	FALSE	constitutive	6.81471
chr11	36334205	36334760	chr11	36312655	36313210	STARR_ID2317	1069.51	0.905214	0.130175	6.95382	3.55536e-12	7.64483e-11	FALSE	TRUE	FALSE	FALSE	constitutive	10.1166
chr11	38482370	38482870	chr11	38460820	38461320	STARR_ID2321	110.137	-0.0484521	0.215386	-0.224955	0.822015	0.929169	FALSE	FALSE	FALSE	FALSE	inactive	0.0319053
chr11	38993564	38994064	chr11	38972014	38972514	STARR_ID2322	126.654	0.306418	0.181104	1.69195	0.0906559	0.355907	FALSE	FALSE	FALSE	FALSE	inactive	0.448663
chr11	43665500	43666000	chr11	43643950	43644450	STARR_ID2325	7574.76	0.0371583	0.137859	0.269538	0.787516	0.916546	TRUE	TRUE	FALSE	FALSE	constitutive	0.0378456
chr11	44165468	44165972	chr11	44143918	44144422	STARR_ID2326	1033.53	-0.0352469	0.141171	-0.249674	0.802839	0.921867	TRUE	TRUE	TRUE	TRUE	constitutive	0.0353318
chr11	44322393	44322893	chr11	44300843	44301343	STARR_ID2327	1644.76	1.711	0.141347	12.1049	9.94606e-34	1.24753e-31	TRUE	TRUE	FALSE	TRUE	induced	30.9039
chr11	44606258	44606758	chr11	44584708	44585208	STARR_ID2330	766.023	-0.218647	0.103056	-2.12164	0.0338683	0.189915	TRUE	FALSE	FALSE	FALSE	constitutive	0.721441
chr11	44610858	44612789	chr11	44589308	44591239	STARR_ID2331	1674.78	-0.0760672	0.0904484	-0.841002	0.400347	0.718141	TRUE	TRUE	FALSE	FALSE	constitutive	0.143791
chr11	45000447	45000947	chr11	44978896	44979396	STARR_ID2334	3527.4	-0.315264	0.081688	-3.85937	0.000113678	0.00126007	TRUE	TRUE	TRUE	TRUE	constitutive	2.89961
chr11	45007328	45007828	chr11	44985777	44986277	STARR_ID2335	483.942	0.0889929	0.0946341	0.940389	0.347018	0.676826	TRUE	TRUE	FALSE	FALSE	constitutive	0.169523
chr11	45182972	45183472	chr11	45161421	45161921	STARR_ID2337	1928.79	0.280074	0.0735367	3.80863	0.000139737	0.00153346	TRUE	TRUE	FALSE	FALSE	constitutive	2.81433
chr11	45284528	45285028	chr11	45262977	45263477	STARR_ID2341	244.529	-0.130464	0.143903	-0.906611	0.364612	0.691	FALSE	FALSE	FALSE	FALSE	inactive	0.160522
chr11	45969217	45969880	chr11	45947666	45948329	STARR_ID2344	565.614	0.315439	0.118359	2.6651	0.00769654	0.0576797	FALSE	FALSE	FALSE	FALSE	inactive	1.23898
chr11	46295455	46296072	chr11	46273904	46274521	STARR_ID2345	716.15	-0.0303895	0.0873633	-0.347852	0.727951	0.889272	FALSE	FALSE	FALSE	FALSE	inactive	0.0509656
chr11	46297581	46298081	chr11	46276030	46276530	STARR_ID2346	720.477	-0.0794003	0.081834	-0.97026	0.331917	0.664917	TRUE	TRUE	FALSE	FALSE	constitutive	0.177232
chr11	46385113	46385676	chr11	46363563	46364126	STARR_ID2347	11451.2	0.938822	0.137858	6.81006	9.75613e-12	2.00435e-10	TRUE	TRUE	FALSE	TRUE	constitutive	9.69803
chr11	46510895	46511670	chr11	46489345	46490120	STARR_ID2348	268.495	-0.0510893	0.132785	-0.384752	0.700421	0.876034	FALSE	FALSE	FALSE	FALSE	inactive	0.0574791
chr11	47210876	47211376	chr11	47189325	47189825	STARR_ID2353	419.127	0.00326747	0.10708	0.0305143	0.975657	0.992111	FALSE	FALSE	FALSE	FALSE	inactive	0.00343954
chr11	47264980	47265480	chr11	47243429	47243929	STARR_ID2355	1045.99	-0.145405	0.114632	-1.26846	0.204634	0.538923	TRUE	FALSE	FALSE	FALSE	constitutive	0.268473
chr11	48071422	48071922	chr11	48049870	48050370	STARR_ID2357	170.536	-0.0991786	0.125091	-0.79285	0.427865	0.734346	FALSE	FALSE	FALSE	FALSE	inactive	0.134099
chr11	48077206	48077737	chr11	48055654	48056185	STARR_ID2358	774.876	-0.0831627	0.0935939	-0.888548	0.374246	0.699919	FALSE	FALSE	FALSE	FALSE	inactive	0.154952
chr11	48107962	48108462	chr11	48086410	48086910	STARR_ID2359	325.794	0.215693	0.124316	1.73504	0.0827337	0.337136	FALSE	FALSE	FALSE	FALSE	inactive	0.472195
chr11	57208120	57208957	chr11	57440647	57441484	STARR_ID2364	739.813	-0.18688	0.0891807	-2.09552	0.0361249	0.197912	FALSE	FALSE	FALSE	FALSE	inactive	0.703528
chr11	57312115	57312615	chr11	57544642	57545142	STARR_ID2367	170.644	-0.0195499	0.163673	-0.119445	0.904923	0.964317	FALSE	FALSE	FALSE	FALSE	inactive	0.0157803
chr11	57424181	57425495	chr11	57656709	57658023	STARR_ID2368	2078.64	0.0416716	0.0814674	0.511513	0.608992	0.833973	TRUE	TRUE	FALSE	FALSE	constitutive	0.0788482
chr11	57549011	57549511	chr11	57781539	57782039	STARR_ID2369	356.511	-0.308851	0.202912	-1.52209	0.127985	0.429593	TRUE	TRUE	FALSE	FALSE	constitutive	0.366943
chr11	57566642	57567142	chr11	57799170	57799670	STARR_ID2370	363.153	-0.0545661	0.111243	-0.490514	0.623771	0.841126	FALSE	FALSE	FALSE	FALSE	inactive	0.0751392
chr11	60138240	60138740	chr11	60370767	60371267	STARR_ID2375	3712.02	-0.277987	0.253409	-1.09699	0.272646	0.610199	TRUE	TRUE	TRUE	TRUE	constitutive	0.214528
chr11	60681127	60681460	chr11	60913655	60913988	STARR_ID2377	425.529	0.0465097	0.138912	0.334813	0.737766	0.89333	FALSE	FALSE	FALSE	FALSE	inactive	0.048988
chr11	60795864	60796364	chr11	61028392	61028892	STARR_ID2378	606.06	-0.104566	0.133732	-0.78191	0.434267	0.736955	FALSE	FALSE	FALSE	FALSE	inactive	0.132559
chr11	60926024	60926474	chr11	61158552	61159002	STARR_ID2379	1813.79	-0.460912	0.0908088	-5.07563	3.86206e-07	5.49488e-06	TRUE	TRUE	TRUE	TRUE	constitutive	5.26004
chr11	61300903	61301403	chr11	61533431	61533931	STARR_ID2381	1992.69	-0.0265047	0.0921139	-0.287739	0.773547	0.909318	FALSE	FALSE	FALSE	FALSE	inactive	0.0412841
chr11	61335178	61335678	chr11	61567706	61568206	STARR_ID2383	1227.16	-0.213674	0.0791537	-2.69948	0.00694472	0.0530462	TRUE	TRUE	FALSE	FALSE	constitutive	1.27535
chr11	61369002	61369502	chr11	61601530	61602030	STARR_ID2386	2250.02	-0.115335	0.0787722	-1.46416	0.143151	0.452558	FALSE	FALSE	FALSE	FALSE	inactive	0.344326
chr11	61394133	61394711	chr11	61626661	61627239	STARR_ID2388	19924.1	0.0397608	0.0893455	0.445023	0.656303	0.856714	TRUE	TRUE	TRUE	TRUE	constitutive	0.0671643
chr11	61462908	61463408	chr11	61695436	61695936	STARR_ID2390	1852.79	-0.0992901	0.0803546	-1.23565	0.216589	0.550841	TRUE	TRUE	FALSE	FALSE	constitutive	0.258974
chr11	61464558	61465058	chr11	61697086	61697586	STARR_ID2391	4172.5	-0.0563129	0.108272	-0.520105	0.602991	0.831077	TRUE	TRUE	FALSE	FALSE	constitutive	0.0803585
chr11	61467429	61467929	chr11	61699957	61700457	STARR_ID2392	3810.97	-0.144062	0.0975558	-1.47672	0.139751	0.447047	TRUE	TRUE	FALSE	FALSE	constitutive	0.349646
chr11	61597740	61598240	chr11	61830268	61830768	STARR_ID2396	266.455	0.131849	0.140051	0.941435	0.346482	0.676777	FALSE	FALSE	FALSE	FALSE	inactive	0.169555
chr11	61738752	61740897	chr11	61971280	61973425	STARR_ID2398	18474.7	-0.0740067	0.132023	-0.560561	0.575097	0.817752	TRUE	TRUE	TRUE	TRUE	constitutive	0.0873785
chr11	61812921	61815553	chr11	62045449	62048081	STARR_ID2401	1764.61	0.0298671	0.0707429	0.422193	0.672884	0.864938	FALSE	FALSE	FALSE	FALSE	inactive	0.0630148
chr11	62008599	62010217	chr11	62241127	62242745	STARR_ID2404	2158.45	0.224941	0.189838	1.18491	0.236052	0.571022	TRUE	TRUE	FALSE	FALSE	constitutive	0.243348
chr11	62166041	62166568	chr11	62398569	62399096	STARR_ID2407	845.833	0.13857	0.104759	1.32276	0.185916	0.515397	TRUE	TRUE	FALSE	FALSE	constitutive	0.287858
chr11	62275758	62276258	chr11	62508286	62508786	STARR_ID2410	130.338	-0.0798263	0.183604	-0.434775	0.663726	0.861143	TRUE	FALSE	FALSE	FALSE	constitutive	0.0649247
chr11	62320800	62321300	chr11	62553328	62553828	STARR_ID2412	1423.73	-0.107965	0.0817985	-1.31989	0.186873	0.516348	TRUE	TRUE	FALSE	FALSE	constitutive	0.287058
chr11	62420585	62420936	chr11	62653113	62653464	STARR_ID2415	11470.7	-0.0391729	0.153423	-0.255326	0.798471	0.919865	TRUE	TRUE	TRUE	TRUE	constitutive	0.036276
chr11	62647851	62649574	chr11	62880379	62882102	STARR_ID2422	143115	-0.183464	0.129197	-1.42003	0.155599	0.470085	TRUE	TRUE	TRUE	TRUE	constitutive	0.327824
chr11	62676700	62677200	chr11	62909228	62909728	STARR_ID2423	925.31	-0.0361122	0.116088	-0.311077	0.755742	0.90098	TRUE	TRUE	FALSE	FALSE	constitutive	0.0452847
chr11	62993890	62994390	chr11	63226418	63226918	STARR_ID2424	130.813	-0.195492	0.175528	-1.11374	0.26539	0.60172	FALSE	FALSE	FALSE	FALSE	inactive	0.220606
chr11	63326094	63326594	chr11	63558622	63559122	STARR_ID2427	907.947	-0.0865541	0.0863007	-1.00294	0.315891	0.651352	TRUE	TRUE	FALSE	FALSE	constitutive	0.186184
chr11	63389761	63390261	chr11	63622289	63622789	STARR_ID2428	497.45	-0.0833448	0.141132	-0.590546	0.554825	0.809039	TRUE	TRUE	FALSE	FALSE	constitutive	0.0920305
chr11	63639541	63640041	chr11	63872069	63872569	STARR_ID2431	421.815	-0.0313089	0.122624	-0.255324	0.798473	0.919865	FALSE	FALSE	FALSE	FALSE	inactive	0.036276
chr11	64004975	64005475	chr11	64237503	64238003	STARR_ID2434	1166.35	-0.118347	0.0718909	-1.6462	0.0997229	0.374852	FALSE	FALSE	FALSE	FALSE	inactive	0.42614
chr11	64035861	64036361	chr11	64268389	64268889	STARR_ID2436	2867.6	0.42351	0.0811383	5.21961	1.79299e-07	2.63765e-06	TRUE	TRUE	FALSE	FALSE	constitutive	5.57878
chr11	64038748	64039195	chr11	64271276	64271723	STARR_ID2437	1498.8	-0.051978	0.107556	-0.483264	0.628909	0.843241	FALSE	FALSE	FALSE	FALSE	inactive	0.0740481
chr11	64274200	64274759	chr11	64506728	64507287	STARR_ID2441	660.839	0.555065	0.0833049	6.66305	2.68197e-11	5.23899e-10	TRUE	TRUE	FALSE	FALSE	constitutive	9.28075
chr11	64578110	64578446	chr11	64810638	64810974	STARR_ID2443	1172.22	0.00529726	0.122541	0.0432286	0.965519	0.988816	TRUE	TRUE	FALSE	FALSE	constitutive	0.00488452
chr11	64644233	64644733	chr11	64876761	64877261	STARR_ID2445	5473.37	0.389647	0.117939	3.3038	0.000953824	0.00903227	TRUE	TRUE	FALSE	TRUE	constitutive	2.0442
chr11	64918189	64918689	chr11	65150718	65151218	STARR_ID2452	695.687	-0.218304	0.115804	-1.88511	0.0594151	0.278185	TRUE	TRUE	FALSE	FALSE	constitutive	0.555667
chr11	65149528	65150004	chr11	65382057	65382533	STARR_ID2454	5265.43	-0.140128	0.107362	-1.30518	0.19183	0.522356	TRUE	TRUE	TRUE	TRUE	constitutive	0.282034
chr11	65185959	65186633	chr11	65418488	65419162	STARR_ID2455	27687	0.744279	0.129233	5.75923	8.45002e-09	1.38404e-07	TRUE	TRUE	TRUE	TRUE	constitutive	6.85885
chr11	65188562	65190194	chr11	65421091	65422723	STARR_ID2456	47295.9	-0.289702	0.151876	-1.90749	0.0564571	0.268824	TRUE	TRUE	TRUE	TRUE	constitutive	0.570531
chr11	65254925	65255425	chr11	65487454	65487954	STARR_ID2458	10930.4	-0.206535	0.165256	-1.24979	0.211377	0.544873	TRUE	TRUE	TRUE	TRUE	constitutive	0.263705
chr11	65313748	65314248	chr11	65546277	65546777	STARR_ID2459	1856.47	-0.00798196	0.0857712	-0.0930611	0.925855	0.97194	TRUE	TRUE	FALSE	FALSE	constitutive	0.0123603
chr11	65323233	65323733	chr11	65555762	65556262	STARR_ID2460	1653.22	-0.048746	0.0998156	-0.48836	0.625295	0.84191	TRUE	TRUE	FALSE	FALSE	constitutive	0.0747341
chr11	65488102	65488505	chr11	65720631	65721034	STARR_ID2462	3698.85	-0.0710711	0.0753642	-0.943034	0.345663	0.676333	TRUE	TRUE	FALSE	FALSE	constitutive	0.16984
chr11	65560598	65561098	chr11	65793127	65793627	STARR_ID2465	1332.34	-0.146208	0.086797	-1.68448	0.0920881	0.35938	TRUE	TRUE	FALSE	FALSE	constitutive	0.444446
chr11	65625556	65625903	chr11	65858085	65858432	STARR_ID2467	2051.82	-0.0888885	0.178822	-0.497077	0.619135	0.838989	TRUE	TRUE	TRUE	TRUE	constitutive	0.0762437
chr11	66516471	66516971	chr11	66749000	66749500	STARR_ID2471	230.782	0.0671579	0.134956	0.497628	0.618746	0.838976	FALSE	FALSE	FALSE	FALSE	inactive	0.0762507
chr11	66751378	66751878	chr11	66983907	66984407	STARR_ID2474	1098.08	-0.0836364	0.0851881	-0.981785	0.326206	0.660493	FALSE	FALSE	FALSE	FALSE	inactive	0.180132
chr11	66795009	66796687	chr11	67027538	67029216	STARR_ID2476	2241.16	0.33401	0.0621214	5.37673	7.58499e-08	1.15258e-06	FALSE	FALSE	FALSE	FALSE	inactive	5.93833
chr11	66822553	66823053	chr11	67055082	67055582	STARR_ID2477	992.613	0.046728	0.106304	0.439568	0.66025	0.858499	TRUE	TRUE	FALSE	FALSE	constitutive	0.0662603
chr11	66829527	66830248	chr11	67062056	67062777	STARR_ID2478	9284.13	0.640195	0.172953	3.70155	0.000214284	0.0022849	TRUE	TRUE	TRUE	TRUE	constitutive	2.64113
chr11	67015960	67016545	chr11	67248489	67249074	STARR_ID2479	1092.35	0.176957	0.125145	1.41402	0.157357	0.472777	TRUE	TRUE	FALSE	TRUE	constitutive	0.325343
chr11	67080032	67080590	chr11	67312561	67313119	STARR_ID2480	1632.47	-0.0557921	0.0941724	-0.592446	0.553552	0.808254	TRUE	TRUE	FALSE	FALSE	constitutive	0.0924519
chr11	67113576	67114076	chr11	67346105	67346605	STARR_ID2481	1421.14	-0.161673	0.130531	-1.23858	0.215501	0.549671	TRUE	TRUE	TRUE	TRUE	constitutive	0.259897
chr11	67195510	67196153	chr11	67428039	67428682	STARR_ID2485	15050.3	-0.0221146	0.103655	-0.213348	0.831055	0.933118	TRUE	TRUE	TRUE	TRUE	constitutive	0.0300634
chr11	67785816	67786316	chr11	68018346	68018847	STARR_ID2489	3863.4	0.926257	0.089088	10.3971	2.55584e-25	1.49167e-23	TRUE	TRUE	FALSE	TRUE	constitutive	22.8263
chr11	67913550	67914050	chr11	68146083	68146583	STARR_ID2493	2615.36	0.026406	0.0720817	0.366334	0.714116	0.88285	TRUE	TRUE	FALSE	FALSE	constitutive	0.0541131
chr11	67983829	67984489	chr11	68216362	68217022	STARR_ID2495	14212.1	0.524691	0.11399	4.60294	4.16568e-06	5.38563e-05	TRUE	TRUE	FALSE	TRUE	constitutive	4.26876
chr11	68065208	68065708	chr11	68297740	68298240	STARR_ID2496	1565.78	-0.0138799	0.075197	-0.184581	0.853558	0.944003	TRUE	TRUE	FALSE	FALSE	constitutive	0.0250264
chr11	68147752	68148252	chr11	68380284	68380784	STARR_ID2498	1456.6	-0.170634	0.144744	-1.17887	0.238451	0.574019	TRUE	TRUE	FALSE	FALSE	constitutive	0.241073
chr11	68180832	68181332	chr11	68413364	68413864	STARR_ID2499	5727.76	-0.0310678	0.0956367	-0.324853	0.745293	0.896885	TRUE	TRUE	FALSE	FALSE	constitutive	0.0472631
chr11	68227454	68228587	chr11	68459986	68461119	STARR_ID2500	10403.1	-0.00199642	0.193477	-0.0103187	0.991767	0.998067	TRUE	TRUE	TRUE	TRUE	constitutive	0.000840403
chr11	68600233	68600733	chr11	68832765	68833265	STARR_ID2502	602.181	-0.120533	0.0837736	-1.4388	0.150208	0.462736	FALSE	FALSE	FALSE	FALSE	inactive	0.334667
chr11	68624875	68625375	chr11	68857407	68857907	STARR_ID2505	308.844	-0.0362029	0.110813	-0.326703	0.743892	0.895876	FALSE	FALSE	FALSE	FALSE	inactive	0.0477523
chr11	68873703	68874203	chr11	69106235	69106735	STARR_ID2507	2405.29	-0.121907	0.131315	-0.928356	0.353223	0.682245	TRUE	TRUE	FALSE	FALSE	constitutive	0.16606
chr11	68889938	68890835	chr11	69122470	69123367	STARR_ID2508	102404	-0.0550091	0.13304	-0.413477	0.679257	0.868483	TRUE	TRUE	TRUE	TRUE	constitutive	0.0612385
chr11	69041983	69042483	chr11	69274516	69275016	STARR_ID2511	811.877	-0.189464	0.121476	-1.55968	0.118835	0.411934	FALSE	FALSE	FALSE	FALSE	inactive	0.385173
chr11	69045528	69046028	chr11	69278061	69278561	STARR_ID2512	1197.04	-0.156361	0.0900965	-1.73548	0.082655	0.336911	TRUE	FALSE	FALSE	FALSE	constitutive	0.472485
chr11	69069167	69069667	chr11	69301700	69302200	STARR_ID2514	6240.35	0.449734	0.0964719	4.66182	3.13433e-06	4.09669e-05	TRUE	TRUE	TRUE	TRUE	constitutive	4.38757
chr11	69294625	69295125	chr11	69479857	69480357	STARR_ID2517	1361.46	0.039993	0.0909257	0.439843	0.660051	0.85849	TRUE	TRUE	FALSE	FALSE	constitutive	0.0662649
chr11	69296243	69296743	chr11	69481475	69481975	STARR_ID2518	668.857	-0.176713	0.151056	-1.16985	0.242062	0.577796	FALSE	FALSE	FALSE	FALSE	inactive	0.238225
chr11	69330034	69332839	chr11	69515266	69518071	STARR_ID2519	5594.86	1.44955	0.11091	13.0697	4.9077e-39	9.74655e-37	TRUE	TRUE	TRUE	TRUE	induced	36.0111
chr11	69344983	69345483	chr11	69530215	69530715	STARR_ID2521	6486.47	0.70901	0.140632	5.0416	4.61658e-07	6.52942e-06	FALSE	TRUE	FALSE	FALSE	constitutive	5.18513
chr11	69356442	69356942	chr11	69541674	69542174	STARR_ID2523	718.243	0.222166	0.180887	1.2282	0.21937	0.553202	TRUE	TRUE	FALSE	FALSE	constitutive	0.257116
chr11	69418792	69419292	chr11	69604024	69604524	STARR_ID2524	257.376	-0.114004	0.109237	-1.04363	0.296655	0.633927	TRUE	TRUE	FALSE	FALSE	constitutive	0.197961
chr11	69511942	69512442	chr11	69697174	69697674	STARR_ID2527	2574.88	0.132509	0.135963	0.974596	0.329761	0.662534	FALSE	FALSE	FALSE	FALSE	inactive	0.178792
chr11	69706301	69708276	chr11	69891533	69893508	STARR_ID2528	2738.76	0.71552	0.0855304	8.36568	5.97695e-17	1.895e-15	TRUE	TRUE	FALSE	TRUE	constitutive	14.7224
chr11	69894803	69895303	chr11	70048697	70049197	STARR_ID2530	758.124	-0.210523	0.12511	-1.68271	0.0924319	0.360426	TRUE	TRUE	FALSE	FALSE	constitutive	0.443183
chr11	69952031	69954864	chr11	70105925	70108758	STARR_ID2533	5859.05	0.398736	0.118303	3.37046	0.000750438	0.0072848	TRUE	TRUE	FALSE	FALSE	constitutive	2.13758
chr11	69962696	69963196	chr11	70116590	70117090	STARR_ID2535	187.782	0.0301012	0.147599	0.203939	0.838401	0.936611	FALSE	FALSE	FALSE	FALSE	inactive	0.0284408
chr11	70015733	70016233	chr11	70169627	70170127	STARR_ID2537	2663.83	-0.126208	0.0685689	-1.8406	0.0656798	0.294272	TRUE	FALSE	FALSE	FALSE	constitutive	0.531251
chr11	70029534	70030034	chr11	70183428	70183928	STARR_ID2539	1579.69	-0.0269755	0.0729061	-0.370003	0.71138	0.88184	FALSE	FALSE	FALSE	FALSE	inactive	0.0546103
chr11	70079575	70080075	chr11	70233469	70233969	STARR_ID2540	1516.04	-0.228264	0.0978924	-2.33178	0.0197121	0.124663	TRUE	TRUE	TRUE	TRUE	constitutive	0.904262
chr11	70093758	70094258	chr11	70247652	70248152	STARR_ID2541	1370.03	0.0159831	0.0735075	0.217435	0.827869	0.932396	FALSE	FALSE	FALSE	FALSE	inactive	0.0303996
chr11	70651686	70652447	chr11	70805581	70806342	STARR_ID2545	54525.9	2.08189	0.168666	12.3433	5.29332e-35	7.2085e-33	TRUE	TRUE	TRUE	TRUE	induced	32.1422
chr11	70781425	70781925	chr11	70935320	70935820	STARR_ID2546	415.487	0.0701576	0.133145	0.526927	0.598244	0.829057	FALSE	FALSE	FALSE	FALSE	inactive	0.0814157
chr11	70864203	70864703	chr11	71153157	71153657	STARR_ID2547	248.007	-0.320776	0.149745	-2.14215	0.0321817	0.182678	FALSE	FALSE	FALSE	FALSE	inactive	0.738314
chr11	70918601	70919059	chr11	71207555	71208013	STARR_ID2548	498.374	0.0826652	0.130331	0.634272	0.525903	0.793193	TRUE	TRUE	FALSE	FALSE	constitutive	0.100621
chr11	70994936	70995436	chr11	71283890	71284390	STARR_ID2549	3971.89	-0.174743	0.152344	-1.14703	0.25137	0.588343	TRUE	TRUE	FALSE	FALSE	constitutive	0.23037
chr11	71136809	71137309	chr11	71425763	71426263	STARR_ID2550	2943.06	-0.178354	0.145512	-1.2257	0.220311	0.554324	TRUE	TRUE	FALSE	FALSE	constitutive	0.256236
chr11	71192400	71192797	chr11	71481354	71481751	STARR_ID2551	1658.29	0.55675	0.405093	1.37437	0.169325	0.488924	TRUE	TRUE	TRUE	TRUE	constitutive	0.310759
chr11	71792927	71793295	chr11	72081881	72082249	STARR_ID2552	176.109	0.0578728	0.156249	0.370388	0.711093	0.88184	FALSE	FALSE	FALSE	FALSE	inactive	0.0546103
chr11	72108836	72109601	chr11	72397792	72398557	STARR_ID2554	1896.75	0.0829382	0.163113	0.50847	0.611124	0.835017	TRUE	TRUE	FALSE	FALSE	constitutive	0.0783045
chr11	72145645	72145945	chr11	72434601	72434901	STARR_ID2555	505.582	0.00918599	0.131693	0.0697533	0.94439	0.979882	TRUE	TRUE	FALSE	FALSE	constitutive	0.00882635
chr11	72493679	72494179	chr11	72782634	72783134	STARR_ID2558	1522.28	-0.0738486	0.0809559	-0.912208	0.361659	0.687743	FALSE	FALSE	FALSE	FALSE	inactive	0.162574
chr11	72497425	72497927	chr11	72786380	72786882	STARR_ID2559	62439.3	0.51171	0.154857	3.30441	0.000951782	0.00901891	TRUE	TRUE	TRUE	TRUE	constitutive	2.04485
chr11	72783831	72784331	chr11	73072786	73073286	STARR_ID2561	578.86	-0.351776	0.116657	-3.01547	0.00256584	0.0219432	TRUE	TRUE	TRUE	TRUE	constitutive	1.6587
chr11	72903296	72903796	chr11	73192251	73192751	STARR_ID2562	924.334	0.0410419	0.0812975	0.504836	0.613674	0.835938	TRUE	TRUE	FALSE	FALSE	constitutive	0.0778258
chr11	72905081	72906131	chr11	73194036	73195086	STARR_ID2563	1609.97	-0.0573326	0.060885	-0.941653	0.34637	0.676777	FALSE	FALSE	FALSE	FALSE	inactive	0.169555
chr11	72908305	72908805	chr11	73197260	73197760	STARR_ID2564	280.291	-0.329016	0.105086	-3.13092	0.00174257	0.0156514	FALSE	FALSE	FALSE	FALSE	inactive	1.80545
chr11	72938886	72939386	chr11	73227841	73228341	STARR_ID2565	823.89	0.182534	0.0715644	2.55063	0.0107529	0.0769933	FALSE	FALSE	FALSE	FALSE	inactive	1.11355
chr11	72968799	72969295	chr11	73257754	73258250	STARR_ID2566	1954.69	0.171164	0.1176	1.45548	0.145537	0.455867	FALSE	FALSE	FALSE	FALSE	inactive	0.341162
chr11	73849478	73849978	chr11	74138433	74138933	STARR_ID2569	320.553	-0.0961653	0.131485	-0.731376	0.46455	0.756521	TRUE	TRUE	TRUE	TRUE	constitutive	0.121179
chr11	74109266	74110209	chr11	74398221	74399164	STARR_ID2572	2615.25	-0.0301513	0.0708854	-0.425353	0.670579	0.863984	TRUE	TRUE	FALSE	FALSE	constitutive	0.0634944
chr11	74158661	74159161	chr11	74447616	74448116	STARR_ID2573	219.437	-0.304453	0.123828	-2.45868	0.0139448	0.0945007	FALSE	FALSE	FALSE	FALSE	inactive	1.02456
chr11	74257736	74258236	chr11	74546691	74547191	STARR_ID2575	351.707	-0.187894	0.10418	-1.80355	0.0713012	0.308763	FALSE	FALSE	FALSE	FALSE	inactive	0.510375
chr11	74347372	74347872	chr11	74636327	74636827	STARR_ID2576	57.6615	-0.0937924	0.208962	-0.44885	0.65354	0.854905	FALSE	FALSE	FALSE	FALSE	inactive	0.068082
chr11	75000016	75000516	chr11	75288972	75289472	STARR_ID2581	1194.05	-0.118373	0.0868313	-1.36325	0.172803	0.494677	FALSE	FALSE	FALSE	FALSE	inactive	0.305678
chr11	75044645	75045943	chr11	75333601	75334899	STARR_ID2582	1953.56	0.328337	0.0791169	4.15002	3.32442e-05	0.00039221	FALSE	TRUE	FALSE	FALSE	constitutive	3.40648
chr11	75053871	75054462	chr11	75342827	75343418	STARR_ID2583	1525.52	-0.126617	0.09869	-1.28297	0.199501	0.53063	TRUE	TRUE	FALSE	FALSE	constitutive	0.275209
chr11	75062087	75062587	chr11	75351043	75351543	STARR_ID2584	13655.5	0.168372	0.0846571	1.98887	0.046716	0.237466	FALSE	FALSE	FALSE	FALSE	inactive	0.624398
chr11	75083334	75083834	chr11	75372290	75372790	STARR_ID2585	5990.12	-0.194518	0.118066	-1.64754	0.0994477	0.374408	TRUE	TRUE	TRUE	TRUE	constitutive	0.426655
chr11	75287420	75287920	chr11	75576375	75576875	STARR_ID2588	4837.8	0.257093	0.0929736	2.76522	0.00568842	0.0445691	TRUE	TRUE	FALSE	FALSE	constitutive	1.35097
chr11	75502965	75503465	chr11	75791920	75792420	STARR_ID2589	643.201	0.118627	0.0928687	1.27737	0.201473	0.533844	FALSE	TRUE	FALSE	FALSE	constitutive	0.272586
chr11	75542798	75543838	chr11	75831753	75832793	STARR_ID2590	711.644	0.350427	0.0965738	3.6286	0.000284966	0.00297209	FALSE	TRUE	FALSE	FALSE	constitutive	2.52694
chr11	76371762	76372262	chr11	76660718	76661218	STARR_ID2592	11628.5	0.203397	0.0898388	2.26403	0.0235725	0.144849	TRUE	TRUE	FALSE	FALSE	constitutive	0.839085
chr11	76411549	76413071	chr11	76700505	76702027	STARR_ID2593	2789.99	-0.0116963	0.090105	-0.129808	0.896719	0.962554	FALSE	FALSE	FALSE	FALSE	inactive	0.016575
chr11	76480689	76481189	chr11	76769645	76770145	STARR_ID2597	6671.63	-0.160844	0.226075	-0.711463	0.476797	0.763463	TRUE	TRUE	FALSE	FALSE	constitutive	0.117212
chr11	76483144	76485282	chr11	76772100	76774238	STARR_ID2598	33072	2.25405	0.197787	11.3964	4.35924e-30	3.87849e-28	TRUE	TRUE	TRUE	TRUE	induced	27.4113
chr11	76499589	76500089	chr11	76788545	76789045	STARR_ID2599	1838.19	-0.0848921	0.0892081	-0.951619	0.34129	0.672155	FALSE	FALSE	FALSE	FALSE	inactive	0.17253
chr11	76547284	76547784	chr11	76836240	76836740	STARR_ID2600	1246.82	-0.143002	0.0695341	-2.05657	0.0397275	0.211964	FALSE	FALSE	FALSE	FALSE	inactive	0.673738
chr11	76746409	76746909	chr11	77035365	77035865	STARR_ID2602	948.627	0.388082	0.114502	3.38932	0.000700672	0.00683491	TRUE	TRUE	FALSE	FALSE	constitutive	2.16527
chr11	77118676	77119176	chr11	77407631	77408131	STARR_ID2603	280.442	0.506669	0.132565	3.82203	0.000132358	0.00145695	FALSE	FALSE	FALSE	FALSE	inactive	2.83655
chr11	77182674	77183267	chr11	77471629	77472222	STARR_ID2604	295.757	-0.0268819	0.167874	-0.160131	0.872778	0.952176	FALSE	FALSE	FALSE	FALSE	inactive	0.0212827
chr11	77772117	77772617	chr11	78061071	78061571	STARR_ID2605	353.102	-0.0345375	0.105508	-0.327344	0.743408	0.895876	FALSE	FALSE	FALSE	FALSE	inactive	0.0477523
chr11	77867018	77867953	chr11	78155972	78156907	STARR_ID2608	1022.97	-0.0586787	0.0893578	-0.65667	0.511393	0.78587	TRUE	FALSE	FALSE	FALSE	constitutive	0.104649
chr11	77899285	77900122	chr11	78188239	78189076	STARR_ID2610	6030.65	-0.125915	0.112075	-1.12349	0.261228	0.59914	TRUE	TRUE	FALSE	FALSE	constitutive	0.222472
chr11	77971046	77971586	chr11	78260000	78260540	STARR_ID2611	568.224	1.38599	0.179587	7.71767	1.18477e-14	3.04148e-13	FALSE	TRUE	FALSE	FALSE	induced	12.5169
chr11	78022892	78023392	chr11	78311846	78312346	STARR_ID2613	461.188	0.0853714	0.0867174	0.984478	0.32488	0.659867	FALSE	FALSE	FALSE	FALSE	inactive	0.180544
chr11	78204008	78204389	chr11	78492962	78493343	STARR_ID2616	41.9645	-0.128802	0.270272	-0.476565	0.633672	0.845742	FALSE	FALSE	FALSE	FALSE	inactive	0.0727622
chr11	78770869	78771759	chr11	79059824	79060714	STARR_ID2618	1592.98	0.541957	0.0783387	6.91813	4.57657e-12	9.76722e-11	TRUE	TRUE	FALSE	FALSE	constitutive	10.0102
chr11	82708186	82708686	chr11	82997144	82997644	STARR_ID2621	204.553	-0.126974	0.118685	-1.06984	0.284692	0.623077	FALSE	FALSE	FALSE	FALSE	inactive	0.205458
chr11	82715222	82715722	chr11	83004180	83004680	STARR_ID2622	176.08	0.917668	0.146115	6.28043	3.37638e-10	6.06518e-09	FALSE	TRUE	FALSE	FALSE	constitutive	8.21716
chr11	82782660	82783359	chr11	83071618	83072317	STARR_ID2623	11173.6	-0.0976802	0.124045	-0.787458	0.431014	0.736711	TRUE	TRUE	TRUE	TRUE	constitutive	0.132703
chr11	82996945	82997298	chr11	83285902	83286255	STARR_ID2624	3311.95	0.000763746	0.110056	0.00693959	0.994463	0.998864	TRUE	TRUE	TRUE	TRUE	constitutive	0.000493661
chr11	84398478	84399093	chr11	84687435	84688050	STARR_ID2629	371.539	1.42027	0.192041	7.39566	1.40704e-13	3.29351e-12	TRUE	TRUE	TRUE	TRUE	induced	11.4823
chr11	84848578	84849078	chr11	85137534	85138034	STARR_ID2630	138.117	0.00778398	0.209081	0.0372295	0.970302	0.990318	FALSE	FALSE	FALSE	FALSE	inactive	0.00422554
chr11	86012990	86013328	chr11	86301948	86302286	STARR_ID2634	1533.77	-0.0605542	0.130624	-0.463575	0.642953	0.849998	TRUE	TRUE	FALSE	FALSE	constitutive	0.0705821
chr11	86382425	86382939	chr11	86671383	86671897	STARR_ID2639	4108.45	0.157781	0.109312	1.4434	0.148908	0.461072	TRUE	TRUE	FALSE	FALSE	constitutive	0.336231
chr11	86410428	86410928	chr11	86699386	86699886	STARR_ID2640	196.62	-0.146501	0.124459	-1.17711	0.239153	0.574716	FALSE	FALSE	FALSE	FALSE	inactive	0.240546
chr11	86694113	86694613	chr11	86983071	86983571	STARR_ID2643	352.398	-0.127315	0.0975152	-1.30559	0.191693	0.522197	FALSE	FALSE	FALSE	FALSE	inactive	0.282165
chr11	86711155	86711655	chr11	87000113	87000613	STARR_ID2644	210.38	-0.10192	0.164911	-0.618032	0.536554	0.798355	FALSE	FALSE	FALSE	FALSE	inactive	0.0978039
chr11	86716411	86716911	chr11	87005369	87005869	STARR_ID2645	304.96	-0.158822	0.128227	-1.2386	0.215495	0.549671	TRUE	TRUE	FALSE	FALSE	constitutive	0.259897
chr11	87465458	87465958	chr11	87754566	87755066	STARR_ID2647	34.1358	0.183472	0.314588	0.583211	0.559751	0.810848	FALSE	TRUE	FALSE	FALSE	constitutive	0.0910606
chr11	87634922	87635464	chr11	87924030	87924572	STARR_ID2648	1704.37	1.14943	0.211501	5.43465	5.49042e-08	8.45987e-07	TRUE	TRUE	FALSE	TRUE	induced	6.07264
chr11	87829145	87829645	chr11	88095977	88096477	STARR_ID2649	1628.01	1.06154	0.13748	7.72137	1.15089e-14	2.95981e-13	TRUE	TRUE	TRUE	TRUE	induced	12.5287
chr11	88151589	88152132	chr11	88418421	88418964	STARR_ID2650	353.292	-0.0460547	0.146555	-0.314248	0.753333	0.900553	TRUE	TRUE	TRUE	TRUE	constitutive	0.0454906
chr11	88442637	88443137	chr11	88709469	88709969	STARR_ID2651	841.237	0.164325	0.117871	1.39412	0.163283	0.479716	TRUE	TRUE	TRUE	TRUE	constitutive	0.319016
chr11	93719506	93720469	chr11	93986340	93987303	STARR_ID2656	1667.94	-0.146055	0.156179	-0.935176	0.349697	0.679115	TRUE	TRUE	FALSE	FALSE	constitutive	0.168057
chr11	93929503	93930003	chr11	94196337	94196837	STARR_ID2657	1400.17	0.0675064	0.106748	0.632387	0.527134	0.793868	FALSE	TRUE	FALSE	FALSE	constitutive	0.100251
chr11	94277204	94277704	chr11	94544038	94544538	STARR_ID2658	4963.85	0.847313	0.124865	6.78585	1.15408e-11	2.35409e-10	TRUE	TRUE	FALSE	TRUE	constitutive	9.62818
chr11	94565826	94566475	chr11	94832660	94833309	STARR_ID2659	820.642	-0.124863	0.191779	-0.651076	0.514998	0.787278	TRUE	TRUE	TRUE	FALSE	constitutive	0.103872
chr11	94571256	94571756	chr11	94838090	94838590	STARR_ID2660	216.451	-0.0981332	0.124757	-0.786593	0.43152	0.736929	FALSE	FALSE	FALSE	FALSE	inactive	0.132574
chr11	94578642	94579285	chr11	94845477	94846120	STARR_ID2661	1158.8	-0.0129486	0.0645348	-0.200646	0.840975	0.93805	FALSE	FALSE	FALSE	FALSE	inactive	0.027774
chr11	95118683	95119183	chr11	95385519	95386019	STARR_ID2663	364.147	1.07908	0.115298	9.35898	8.05067e-21	3.39577e-19	FALSE	TRUE	FALSE	FALSE	induced	18.4691
chr11	95120465	95120965	chr11	95387301	95387801	STARR_ID2664	927.57	1.81079	0.220736	8.20344	2.33612e-16	6.97373e-15	FALSE	TRUE	FALSE	TRUE	induced	14.1565
chr11	95800989	95801489	chr11	96067825	96068325	STARR_ID2668	24.3855	-0.278347	0.300015	-0.927777	0.353523	0.68225	FALSE	FALSE	FALSE	FALSE	inactive	0.166057
chr11	95878339	95878841	chr11	96145175	96145677	STARR_ID2669	278.108	-0.192917	0.123556	-1.56137	0.118436	0.411147	TRUE	FALSE	FALSE	FALSE	constitutive	0.386003
chr11	100503575	100504158	chr11	100632844	100633427	STARR_ID2673	858.889	0.0376103	0.111399	0.337619	0.735651	0.892262	FALSE	TRUE	FALSE	FALSE	constitutive	0.0495075
chr11	100563115	100563615	chr11	100692384	100692884	STARR_ID2674	256.913	0.130434	0.139216	0.936921	0.348799	0.677967	TRUE	TRUE	FALSE	FALSE	constitutive	0.168791
chr11	100851563	100852234	chr11	100980832	100981503	STARR_ID2676	301.452	-0.177941	0.130072	-1.36802	0.171307	0.491871	FALSE	FALSE	FALSE	FALSE	inactive	0.308149
chr11	100870295	100870970	chr11	100999564	101000239	STARR_ID2677	16480.1	2.48446	0.259171	9.58618	9.14077e-22	4.14933e-20	TRUE	TRUE	TRUE	TRUE	induced	19.382
chr11	100904543	100905474	chr11	101033812	101034743	STARR_ID2678	1995.71	1.39447	0.154532	9.02377	1.81726e-19	6.85619e-18	TRUE	TRUE	TRUE	TRUE	induced	17.1639
chr11	100948823	100949698	chr11	101078092	101078967	STARR_ID2679	19.9709	0.33568	0.39154	0.857333	0.391261	0.711624	FALSE	FALSE	FALSE	FALSE	inactive	0.147749
chr11	101132836	101133427	chr11	101262105	101262696	STARR_ID2682	3.50809	-1.11753	0.938879	-1.19028	0.233936	0.569235	FALSE	FALSE	FALSE	FALSE	inactive	0.244709
chr11	101169774	101170765	chr11	101299043	101300034	STARR_ID2683	1100.96	1.19154	0.166313	7.16447	7.80893e-13	1.73925e-11	TRUE	TRUE	FALSE	TRUE	induced	10.7596
chr11	101222321	101223156	chr11	101351590	101352425	STARR_ID2686	141.048	0.169515	0.173583	0.976567	0.328783	0.662109	FALSE	FALSE	FALSE	FALSE	inactive	0.17907
chr11	101308865	101309365	chr11	101438134	101438634	STARR_ID2688	152.401	0.0833097	0.141916	0.587037	0.557179	0.809765	FALSE	FALSE	FALSE	FALSE	inactive	0.0916411
chr11	101312225	101312945	chr11	101441494	101442214	STARR_ID2689	2714.7	1.30634	0.146666	8.9069	5.24774e-19	1.90935e-17	TRUE	TRUE	FALSE	TRUE	induced	16.7191
chr11	103423208	103423784	chr11	103552480	103553056	STARR_ID2692	831.514	1.13184	0.127948	8.8461	9.06306e-19	3.23982e-17	TRUE	TRUE	FALSE	TRUE	induced	16.4895
chr11	106331797	106332959	chr11	106461070	106462232	STARR_ID2694	290.299	1.61613	0.231933	6.96809	3.21272e-12	6.93939e-11	TRUE	TRUE	FALSE	TRUE	induced	10.1587
chr11	107279432	107279932	chr11	107408706	107409206	STARR_ID2695	46.061	0.568856	0.270711	2.10134	0.0356114	0.196021	FALSE	FALSE	FALSE	FALSE	inactive	0.707696
chr11	107991953	107992748	chr11	108121226	108122021	STARR_ID2697	4963.83	-0.158775	0.0716418	-2.21623	0.0266759	0.159132	TRUE	TRUE	FALSE	FALSE	constitutive	0.798243
chr11	108395116	108395662	chr11	108524389	108524935	STARR_ID2698	411.115	0.037483	0.114731	0.326702	0.743894	0.895876	FALSE	FALSE	FALSE	FALSE	inactive	0.0477523
chr11	108442761	108443261	chr11	108572034	108572534	STARR_ID2700	489.683	-0.0543681	0.0949626	-0.572521	0.566969	0.813312	FALSE	FALSE	FALSE	FALSE	inactive	0.0897428
chr11	110166313	110166912	chr11	110295588	110296187	STARR_ID2704	2940.74	0.0210244	0.1504	0.13979	0.888826	0.958532	TRUE	TRUE	FALSE	FALSE	constitutive	0.0183936
chr11	110764899	110765399	chr11	110894175	110894675	STARR_ID2706	1678.93	-0.0653889	0.0868053	-0.753282	0.451281	0.746974	FALSE	FALSE	FALSE	FALSE	inactive	0.126695
chr11	111205305	111205805	chr11	111334580	111335080	STARR_ID2707	1192.28	0.858179	0.0962305	8.91795	4.75006e-19	1.74157e-17	TRUE	TRUE	FALSE	TRUE	constitutive	16.7591
chr11	111671196	111671645	chr11	111800472	111800921	STARR_ID2710	282.212	0.207023	0.137489	1.50575	0.132132	0.435411	FALSE	FALSE	FALSE	FALSE	inactive	0.361101
chr11	112163726	112164226	chr11	112293003	112293503	STARR_ID2713	592.694	0.414399	0.123295	3.36105	0.000776468	0.00749171	TRUE	TRUE	FALSE	FALSE	constitutive	2.12542
chr11	112214072	112214572	chr11	112343349	112343849	STARR_ID2714	459.974	-0.0675033	0.125022	-0.539931	0.589245	0.82394	TRUE	FALSE	FALSE	FALSE	constitutive	0.0841044
chr11	112578280	112578780	chr11	112707557	112708057	STARR_ID2716	1129.17	0.4063	0.128586	3.15975	0.00157907	0.0143268	TRUE	TRUE	FALSE	TRUE	constitutive	1.84385
chr11	113055203	113055725	chr11	113184481	113185003	STARR_ID2718	3486.67	1.1803	0.203118	5.81091	6.21359e-09	1.03724e-07	TRUE	TRUE	TRUE	TRUE	induced	6.98412
chr11	113210853	113211353	chr11	113340131	113340631	STARR_ID2720	335.763	-0.0477271	0.106879	-0.446552	0.655199	0.855979	FALSE	FALSE	FALSE	FALSE	inactive	0.0675371
chr11	113652503	113653003	chr11	113781781	113782281	STARR_ID2722	425.919	0.0567941	0.122691	0.462904	0.643433	0.850046	FALSE	FALSE	FALSE	FALSE	inactive	0.0705575
chr11	113911364	113911864	chr11	114040642	114041142	STARR_ID2723	922.085	-0.132231	0.111332	-1.18772	0.234945	0.570296	TRUE	TRUE	FALSE	FALSE	constitutive	0.2439
chr11	113925679	113926179	chr11	114054957	114055457	STARR_ID2724	388.705	0.516267	0.129686	3.98091	6.86529e-05	0.00078034	TRUE	TRUE	FALSE	FALSE	constitutive	3.10772
chr11	114030498	114031251	chr11	114159776	114160529	STARR_ID2725	3115.38	-0.026889	0.0801744	-0.335382	0.737337	0.893036	TRUE	TRUE	FALSE	FALSE	constitutive	0.0491309
chr11	114033525	114034025	chr11	114162803	114163303	STARR_ID2726	269.097	-0.313883	0.174061	-1.80329	0.0713426	0.308849	FALSE	FALSE	FALSE	FALSE	inactive	0.510254
chr11	114049911	114050411	chr11	114179189	114179689	STARR_ID2728	191.242	-0.280701	0.134677	-2.08425	0.0371373	0.201552	FALSE	FALSE	FALSE	FALSE	inactive	0.695612
chr11	114186654	114187154	chr11	114315932	114316432	STARR_ID2730	1160.43	1.89093	0.122445	15.443	8.40339e-54	5.22435e-51	TRUE	TRUE	FALSE	TRUE	induced	50.282
chr11	115342097	115342597	chr11	115471378	115471878	STARR_ID2733	2308.02	0.798522	0.0795154	10.0424	9.92692e-24	5.08764e-22	TRUE	TRUE	FALSE	TRUE	constitutive	21.2935
chr11	115585896	115586355	chr11	115715178	115715637	STARR_ID2735	195.832	0.024644	0.151221	0.162966	0.870545	0.951621	FALSE	FALSE	FALSE	FALSE	inactive	0.021536
chr11	116268341	116268833	chr11	116397624	116398116	STARR_ID2738	149.441	-0.374692	0.14135	-2.65081	0.0080298	0.0598156	TRUE	TRUE	TRUE	FALSE	constitutive	1.22319
chr11	116723106	116723606	chr11	116852390	116852890	STARR_ID2741	407.711	-0.16332	0.111893	-1.45961	0.144397	0.454185	TRUE	TRUE	FALSE	FALSE	constitutive	0.342767
chr11	116942020	116942520	chr11	117071304	117071804	STARR_ID2743	273.856	0.101452	0.130521	0.777283	0.436992	0.738686	FALSE	FALSE	FALSE	FALSE	inactive	0.13154
chr11	117054608	117056453	chr11	117183892	117185737	STARR_ID2744	1091.55	-0.044239	0.0909029	-0.486662	0.626498	0.842499	FALSE	FALSE	FALSE	FALSE	inactive	0.0744306
chr11	117369350	117369653	chr11	117498635	117498938	STARR_ID2747	532.649	0.245601	0.102355	2.39949	0.0164178	0.108428	TRUE	TRUE	FALSE	FALSE	constitutive	0.964857
chr11	117588528	117589028	chr11	117717813	117718313	STARR_ID2748	2997	-0.239323	0.164491	-1.45494	0.145687	0.456137	TRUE	TRUE	TRUE	FALSE	constitutive	0.340904
chr11	117704136	117704636	chr11	117833421	117833921	STARR_ID2749	1841.31	-0.153847	0.0808832	-1.90208	0.0571603	0.27127	TRUE	TRUE	FALSE	FALSE	constitutive	0.566599
chr11	117928558	117929058	chr11	118057843	118058343	STARR_ID2750	3496.06	1.32693	0.210207	6.31251	2.74554e-10	4.95688e-09	TRUE	TRUE	FALSE	TRUE	induced	8.30479
chr11	117959302	117959802	chr11	118088587	118089087	STARR_ID2751	416.54	-0.123676	0.145337	-0.850957	0.394793	0.714124	FALSE	FALSE	FALSE	FALSE	inactive	0.146226
chr11	118415304	118416706	chr11	118544589	118545991	STARR_ID2754	981.872	-0.0695009	0.0762293	-0.911735	0.361908	0.688063	TRUE	FALSE	FALSE	FALSE	constitutive	0.162372
chr11	118493761	118494261	chr11	118623046	118623546	STARR_ID2755	3807.13	-0.110114	0.127108	-0.866297	0.386327	0.707401	TRUE	TRUE	FALSE	FALSE	constitutive	0.150335
chr11	118788865	118789365	chr11	118918156	118918656	STARR_ID2759	795.855	-0.158612	0.087317	-1.8165	0.0692933	0.30412	FALSE	FALSE	FALSE	FALSE	inactive	0.516954
chr11	118790537	118791037	chr11	118919828	118920328	STARR_ID2760	894.399	0.0297214	0.112018	0.265326	0.790758	0.917614	TRUE	TRUE	FALSE	FALSE	constitutive	0.0373401
chr11	118792811	118793311	chr11	118922102	118922602	STARR_ID2761	1696.03	-0.176086	0.101664	-1.73203	0.0832685	0.337967	TRUE	TRUE	FALSE	FALSE	constitutive	0.471126
chr11	120172611	120173111	chr11	120301902	120302402	STARR_ID2773	696.741	-0.101553	0.0977552	-1.03885	0.298875	0.636049	FALSE	FALSE	FALSE	FALSE	inactive	0.196509
chr11	120507831	120508331	chr11	120637122	120637622	STARR_ID2774	645.88	0.0968364	0.137958	0.701929	0.482724	0.767128	FALSE	FALSE	FALSE	FALSE	inactive	0.115132
chr11	120779553	120780053	chr11	120908844	120909344	STARR_ID2777	1236.67	-0.0375679	0.0752571	-0.499194	0.617643	0.838306	TRUE	TRUE	FALSE	FALSE	constitutive	0.0765977
chr11	121171009	121171509	chr11	121300300	121300800	STARR_ID2778	204.793	0.0477757	0.135894	0.351566	0.725164	0.887716	FALSE	FALSE	FALSE	FALSE	inactive	0.0517259
chr11	121196665	121197572	chr11	121325956	121326863	STARR_ID2779	2988.11	0.993965	0.125047	7.94877	1.88378e-15	5.2101e-14	TRUE	TRUE	FALSE	TRUE	constitutive	13.2832
chr11	121347053	121347553	chr11	121476344	121476844	STARR_ID2782	1159.78	-0.32784	0.157558	-2.08076	0.0374558	0.202664	TRUE	TRUE	TRUE	TRUE	constitutive	0.693223
chr11	121348834	121349585	chr11	121478125	121478876	STARR_ID2783	1745.31	-0.0806352	0.154652	-0.521399	0.602089	0.830696	FALSE	FALSE	FALSE	FALSE	inactive	0.0805577
chr11	121823705	121824160	chr11	121952997	121953452	STARR_ID2786	2684.08	0.969337	0.132895	7.29402	3.00841e-13	6.88276e-12	TRUE	TRUE	FALSE	TRUE	constitutive	11.1622
chr11	122349733	122350518	chr11	122479025	122479810	STARR_ID2789	551.884	0.897282	0.124648	7.19853	6.08667e-13	1.36202e-11	TRUE	TRUE	FALSE	TRUE	constitutive	10.8658
chr11	122967072	122967572	chr11	123096364	123096864	STARR_ID2794	1346.23	1.90205	0.210333	9.04303	1.5239e-19	5.77992e-18	TRUE	TRUE	TRUE	TRUE	induced	17.2381
chr11	123037111	123037401	chr11	123166403	123166693	STARR_ID2795	187.462	-0.217061	0.176826	-1.22754	0.219619	0.553202	TRUE	TRUE	FALSE	FALSE	constitutive	0.257116
chr11	124906870	124907370	chr11	125036974	125037474	STARR_ID2798	569.283	-0.149899	0.0981072	-1.52791	0.126535	0.426814	FALSE	FALSE	FALSE	FALSE	inactive	0.369762
chr11	125950061	125950561	chr11	126080166	126080666	STARR_ID2803	598.048	-0.174277	0.0784686	-2.22098	0.0263523	0.15753	TRUE	TRUE	FALSE	FALSE	constitutive	0.802637
chr11	125953003	125953503	chr11	126083108	126083608	STARR_ID2804	690.603	0.0731835	0.0933113	0.784294	0.432868	0.736955	FALSE	FALSE	FALSE	FALSE	inactive	0.132559
chr11	126235336	126235836	chr11	126365441	126365941	STARR_ID2810	5143.63	0.172077	0.106536	1.6152	0.106267	0.387409	TRUE	TRUE	TRUE	TRUE	constitutive	0.411831
chr11	128477725	128478152	chr11	128607830	128608257	STARR_ID2825	261.49	-0.336685	0.119675	-2.81334	0.004903	0.0391228	FALSE	FALSE	FALSE	FALSE	inactive	1.40757
chr11	128738739	128739239	chr11	128868844	128869344	STARR_ID2826	1294.91	1.51668	0.149494	10.1454	3.47272e-24	1.84597e-22	TRUE	TRUE	FALSE	TRUE	induced	21.7338
chr11	128888173	128888673	chr11	129018278	129018778	STARR_ID2828	5.17813	-0.538222	0.66489	-0.80949	0.418233	0.729245	TRUE	FALSE	FALSE	FALSE	constitutive	0.137127
chr11	128911356	128911856	chr11	129041461	129041961	STARR_ID2829	80.8504	-0.140973	0.232352	-0.606721	0.544036	0.803424	FALSE	FALSE	FALSE	FALSE	inactive	0.0950554
chr11	129185728	129186228	chr11	129315833	129316333	STARR_ID2830	932.822	-0.206809	0.109647	-1.88613	0.0592773	0.277904	TRUE	TRUE	FALSE	FALSE	constitutive	0.556106
chr11	129188983	129189483	chr11	129319088	129319588	STARR_ID2831	75.301	-0.158652	0.188469	-0.841792	0.399904	0.717913	FALSE	FALSE	FALSE	FALSE	inactive	0.143928
chr11	129194375	129194875	chr11	129324480	129324980	STARR_ID2832	917.2	0.0319612	0.127015	0.251634	0.801324	0.921277	TRUE	TRUE	TRUE	TRUE	constitutive	0.0356096
chr11	129326134	129329253	chr11	129456239	129459358	STARR_ID2833	2721.88	-0.0886545	0.0781237	-1.1348	0.256461	0.593675	FALSE	FALSE	FALSE	FALSE	inactive	0.226451
chr11	129513022	129513522	chr11	129643127	129643627	STARR_ID2835	378.971	-0.162477	0.0868101	-1.87164	0.0612565	0.283093	TRUE	FALSE	FALSE	FALSE	constitutive	0.54807
chr11	129564383	129566266	chr11	129694488	129696371	STARR_ID2836	4067.47	0.810089	0.0718876	11.2688	1.87026e-29	1.54583e-27	TRUE	TRUE	FALSE	FALSE	constitutive	26.8108
chr11	129601233	129601733	chr11	129731338	129731838	STARR_ID2837	738.371	-0.00206278	0.0916398	-0.0225096	0.982041	0.994914	TRUE	TRUE	FALSE	FALSE	constitutive	0.00221463
chr11	129734627	129735127	chr11	129864732	129865232	STARR_ID2839	904.16	-0.0423672	0.104533	-0.4053	0.685257	0.871023	TRUE	FALSE	FALSE	FALSE	constitutive	0.0599703
chr11	130299842	130300342	chr11	130429947	130430447	STARR_ID2843	494.813	0.848106	0.112378	7.54688	4.45796e-14	1.09338e-12	FALSE	TRUE	FALSE	FALSE	constitutive	11.9612
chr11	130351576	130352076	chr11	130481681	130482181	STARR_ID2844	378.693	0.753474	0.188271	4.00208	6.2789e-05	0.000718256	TRUE	TRUE	FALSE	FALSE	constitutive	3.14372
chr11	130402987	130403487	chr11	130533092	130533592	STARR_ID2846	368.502	-0.0983155	0.104217	-0.943376	0.345488	0.676176	FALSE	FALSE	FALSE	FALSE	inactive	0.169941
chr11	130473172	130474955	chr11	130603277	130605060	STARR_ID2848	1470.24	-0.0688707	0.100227	-0.687147	0.49199	0.773328	FALSE	FALSE	FALSE	FALSE	inactive	0.111636
chr11	130523756	130524557	chr11	130653861	130654662	STARR_ID2849	2160.67	-0.0944649	0.153021	-0.617334	0.537014	0.798873	FALSE	FALSE	FALSE	FALSE	inactive	0.0975222
chr11	131561965	131562465	chr11	131692071	131692571	STARR_ID2855	691.75	0.0592904	0.126724	0.467869	0.639878	0.848205	FALSE	FALSE	FALSE	FALSE	inactive	0.0714989
chr11	131767081	131767581	chr11	131897187	131897687	STARR_ID2856	2195.27	0.330032	0.134649	2.45106	0.0142435	0.0963878	TRUE	TRUE	TRUE	TRUE	constitutive	1.01598
chr11	133085355	133085855	chr11	133215460	133215960	STARR_ID2857	6872.27	1.1035	0.147022	7.50568	6.11126e-14	1.48257e-12	TRUE	TRUE	TRUE	TRUE	induced	11.829
chr12	834190	834759	chr12	725024	725593	STARR_ID2864	2824.24	1.25314	0.113229	11.0673	1.80733e-28	1.35303e-26	TRUE	TRUE	FALSE	TRUE	induced	25.8687
chr12	861078	861881	chr12	751912	752715	STARR_ID2865	3501.79	-0.0432163	0.0782802	-0.552072	0.580899	0.82086	TRUE	TRUE	FALSE	FALSE	constitutive	0.0857311
chr12	1628387	1628887	chr12	1519221	1519721	STARR_ID2869	1289.38	-0.124804	0.11591	-1.07673	0.2816	0.619954	TRUE	TRUE	FALSE	FALSE	constitutive	0.20764
chr12	1684770	1685270	chr12	1575604	1576104	STARR_ID2870	346.138	-0.0412661	0.138401	-0.298163	0.765579	0.905556	FALSE	FALSE	FALSE	FALSE	inactive	0.0430847
chr12	1940115	1940615	chr12	1830949	1831449	STARR_ID2871	2275.99	-0.110794	0.110025	-1.00698	0.313942	0.649659	TRUE	FALSE	FALSE	FALSE	constitutive	0.187315
chr12	1945966	1946466	chr12	1836800	1837300	STARR_ID2872	2307.36	-0.0335838	0.0952375	-0.352632	0.724364	0.887346	TRUE	TRUE	FALSE	FALSE	constitutive	0.0519072
chr12	1968735	1969235	chr12	1859569	1860069	STARR_ID2873	896.783	-0.0844021	0.0834651	-1.01123	0.311908	0.64751	FALSE	FALSE	FALSE	FALSE	inactive	0.188754
chr12	2041363	2041894	chr12	1932197	1932728	STARR_ID2874	8944.1	0.0675978	0.119765	0.564418	0.57247	0.815903	FALSE	FALSE	FALSE	FALSE	inactive	0.0883617
chr12	2280088	2280588	chr12	2170922	2171422	STARR_ID2877	1475.3	0.535232	0.10002	5.35126	8.73428e-08	1.31603e-06	TRUE	TRUE	FALSE	FALSE	constitutive	5.88073
chr12	2873445	2873945	chr12	2764279	2764779	STARR_ID2880	403.445	-0.332685	0.108475	-3.06692	0.00216279	0.0189264	FALSE	FALSE	FALSE	FALSE	inactive	1.72293
chr12	2904788	2905611	chr12	2795622	2796445	STARR_ID2882	93532.6	2.31002	0.212314	10.8802	1.43254e-27	9.99217e-26	TRUE	TRUE	TRUE	TRUE	induced	25.0003
chr12	3323970	3324470	chr12	3214804	3215304	STARR_ID2887	684.71	-0.0854242	0.0924757	-0.923747	0.355618	0.683557	FALSE	FALSE	FALSE	FALSE	inactive	0.165225
chr12	3424345	3424845	chr12	3315179	3315679	STARR_ID2888	2185.2	-0.0927347	0.0903719	-1.02614	0.304823	0.64127	TRUE	TRUE	FALSE	FALSE	constitutive	0.192959
chr12	3623420	3623920	chr12	3514254	3514754	STARR_ID2890	4510.13	1.79843	0.195751	9.18735	4.02639e-20	1.58169e-18	TRUE	TRUE	FALSE	TRUE	induced	17.8009
chr12	3857523	3858023	chr12	3748357	3748857	STARR_ID2891	843.638	-0.21064	0.0985423	-2.13756	0.0325526	0.183898	TRUE	TRUE	FALSE	FALSE	constitutive	0.735423
chr12	3900720	3901220	chr12	3791554	3792054	STARR_ID2893	1406.28	-0.0993798	0.0792291	-1.25433	0.20972	0.543677	TRUE	TRUE	FALSE	FALSE	constitutive	0.264659
chr12	6198119	6198619	chr12	6088953	6089453	STARR_ID2896	643.411	0.0642429	0.101174	0.634973	0.525446	0.793193	TRUE	TRUE	FALSE	FALSE	constitutive	0.100621
chr12	6325103	6325603	chr12	6215937	6216437	STARR_ID2898	3853.89	0.0741288	0.146187	0.507084	0.612096	0.835343	TRUE	TRUE	TRUE	TRUE	constitutive	0.0781352
chr12	6331119	6331902	chr12	6221953	6222736	STARR_ID2899	3090.08	-0.0879263	0.0951818	-0.923772	0.355605	0.683557	TRUE	TRUE	FALSE	FALSE	constitutive	0.165225
chr12	6338239	6340233	chr12	6229073	6231067	STARR_ID2900	4016.89	-0.157793	0.0721072	-2.18831	0.028647	0.166986	TRUE	FALSE	FALSE	FALSE	constitutive	0.777321
chr12	6344498	6344998	chr12	6235332	6235832	STARR_ID2901	882.463	-0.270132	0.0993348	-2.7194	0.00653997	0.0502498	TRUE	TRUE	FALSE	FALSE	constitutive	1.29887
chr12	6373784	6374284	chr12	6264618	6265118	STARR_ID2902	974.026	-0.0940425	0.0738317	-1.27374	0.202755	0.535796	FALSE	FALSE	FALSE	FALSE	inactive	0.271
chr12	6387430	6387930	chr12	6278264	6278764	STARR_ID2903	3038.1	0.461785	0.197968	2.33262	0.019668	0.124439	TRUE	TRUE	TRUE	TRUE	constitutive	0.905042
chr12	6445307	6446266	chr12	6336141	6337100	STARR_ID2904	4322.61	-0.0154843	0.131143	-0.118072	0.906011	0.964317	TRUE	TRUE	TRUE	TRUE	constitutive	0.0157803
chr12	6472815	6473440	chr12	6363649	6364274	STARR_ID2905	5218.9	0.700334	0.0841253	8.32488	8.44112e-17	2.65274e-15	TRUE	TRUE	TRUE	TRUE	constitutive	14.5763
chr12	6642284	6643207	chr12	6533118	6534041	STARR_ID2906	3268.54	0.0711583	0.0762828	0.932823	0.350911	0.680271	FALSE	FALSE	FALSE	FALSE	inactive	0.167318
chr12	7070380	7070880	chr12	6961217	6961717	STARR_ID2910	1969.29	-0.153984	0.0870336	-1.76925	0.0768518	0.322732	TRUE	TRUE	FALSE	FALSE	constitutive	0.491158
chr12	7417898	7418398	chr12	7265302	7265802	STARR_ID2913	306.39	0.135341	0.121782	1.11134	0.266423	0.602501	FALSE	FALSE	FALSE	FALSE	inactive	0.220042
chr12	8038687	8038896	chr12	7886091	7886300	STARR_ID2914	0.461083	0.175551	2.11293	0.0830843	0.933785	0.975839	FALSE	FALSE	FALSE	FALSE	inactive	0.0106218
chr12	8980526	8981026	chr12	8827930	8828430	STARR_ID2916	49.3776	-0.458173	0.327925	-1.39719	0.162357	0.478765	TRUE	TRUE	FALSE	FALSE	constitutive	0.319877
chr12	9800982	9801482	chr12	9648386	9648886	STARR_ID2918	724.293	-0.0415649	0.0748817	-0.555074	0.578844	0.819815	TRUE	TRUE	FALSE	FALSE	constitutive	0.0862843
chr12	11883096	11883596	chr12	11730162	11730662	STARR_ID2922	1213.54	-0.1149	0.179936	-0.638563	0.523107	0.792487	TRUE	TRUE	FALSE	FALSE	constitutive	0.101008
chr12	11907284	11907784	chr12	11754350	11754850	STARR_ID2923	702.305	0.426792	0.117126	3.64388	0.00026856	0.00282364	FALSE	FALSE	FALSE	FALSE	inactive	2.54919
chr12	12038434	12039343	chr12	11885500	11886409	STARR_ID2924	540.281	-0.140753	0.129426	-1.08752	0.276806	0.61556	FALSE	FALSE	FALSE	FALSE	inactive	0.210729
chr12	12585194	12586823	chr12	12432260	12433889	STARR_ID2928	487.301	-0.0521554	0.109489	-0.476354	0.633822	0.845747	FALSE	FALSE	FALSE	FALSE	inactive	0.0727596
chr12	12670599	12671099	chr12	12517665	12518165	STARR_ID2929	479.185	0.523917	0.106546	4.9173	8.77465e-07	1.20759e-05	FALSE	TRUE	FALSE	FALSE	constitutive	4.91808
chr12	12715450	12715873	chr12	12562516	12562939	STARR_ID2930	2707.54	0.212726	0.579458	0.367113	0.713535	0.882817	TRUE	TRUE	TRUE	TRUE	constitutive	0.0541293
chr12	12739856	12740321	chr12	12586922	12587387	STARR_ID2931	330.36	0.414426	0.13997	2.96081	0.00306833	0.0257477	TRUE	TRUE	FALSE	TRUE	constitutive	1.58926
chr12	12932435	12932935	chr12	12779501	12780001	STARR_ID2934	286.861	-0.351418	0.112822	-3.11481	0.00184062	0.0164391	TRUE	TRUE	TRUE	FALSE	constitutive	1.78412
chr12	12972795	12973295	chr12	12819861	12820361	STARR_ID2935	351.884	-0.0567253	0.119859	-0.473265	0.636024	0.8469	FALSE	FALSE	FALSE	FALSE	inactive	0.072168
chr12	13024904	13026115	chr12	12871970	12873181	STARR_ID2936	9582.5	-0.279949	0.199028	-1.40658	0.159552	0.475298	TRUE	TRUE	TRUE	TRUE	constitutive	0.323034
chr12	13036309	13036809	chr12	12883375	12883875	STARR_ID2937	478.986	-0.200806	0.124255	-1.61608	0.106077	0.387334	TRUE	TRUE	TRUE	TRUE	constitutive	0.411914
chr12	13194113	13194534	chr12	13041179	13041600	STARR_ID2939	134.422	-0.260326	0.168244	-1.54732	0.121787	0.418207	FALSE	FALSE	FALSE	FALSE	inactive	0.378609
chr12	13214455	13214955	chr12	13061521	13062021	STARR_ID2940	550.359	-0.227526	0.0926741	-2.45512	0.0140836	0.0953962	TRUE	TRUE	FALSE	FALSE	constitutive	1.02047
chr12	13288655	13289155	chr12	13135721	13136221	STARR_ID2942	1155.72	-0.0647463	0.16312	-0.396924	0.691424	0.87234	TRUE	TRUE	FALSE	FALSE	constitutive	0.0593142
chr12	14413435	14413935	chr12	14260501	14261001	STARR_ID2949	1824.02	-0.0419341	0.183357	-0.228701	0.819101	0.927916	TRUE	TRUE	FALSE	FALSE	constitutive	0.0324911
chr12	14690220	14690720	chr12	14537286	14537786	STARR_ID2950	242.98	-0.0753153	0.131385	-0.573239	0.566483	0.813267	FALSE	FALSE	FALSE	FALSE	inactive	0.0897668
chr12	15007460	15007960	chr12	14854526	14855026	STARR_ID2954	142.159	-0.0259785	0.166606	-0.155927	0.87609	0.953358	FALSE	FALSE	FALSE	FALSE	inactive	0.0207442
chr12	15021885	15022385	chr12	14868951	14869451	STARR_ID2955	1296.44	-0.0113548	0.155623	-0.0729639	0.941835	0.979155	TRUE	TRUE	TRUE	TRUE	constitutive	0.00914858
chr12	15081860	15083522	chr12	14928926	14930588	STARR_ID2957	144.312	-0.263148	0.195874	-1.34345	0.179126	0.505291	TRUE	TRUE	FALSE	FALSE	constitutive	0.296458
chr12	15368838	15369977	chr12	15215904	15217043	STARR_ID2960	561.779	0.204343	0.090174	2.2661	0.0234452	0.144315	FALSE	TRUE	FALSE	FALSE	constitutive	0.840689
chr12	15373575	15373990	chr12	15220641	15221056	STARR_ID2961	118.481	0.067585	0.170656	0.39603	0.692083	0.872441	FALSE	FALSE	FALSE	FALSE	inactive	0.0592642
chr12	15375091	15375461	chr12	15222157	15222527	STARR_ID2962	266.694	-0.160705	0.124103	-1.29493	0.195344	0.526211	FALSE	FALSE	FALSE	FALSE	inactive	0.27884
chr12	15395954	15396887	chr12	15243020	15243953	STARR_ID2963	1782.56	0.582541	0.0732222	7.9558	1.77975e-15	4.94147e-14	TRUE	TRUE	FALSE	FALSE	constitutive	13.3061
chr12	15426808	15427308	chr12	15273874	15274374	STARR_ID2964	120.119	0.36761	0.189075	1.94426	0.0518646	0.253716	FALSE	TRUE	FALSE	FALSE	constitutive	0.595652
chr12	19174242	19174982	chr12	19021308	19022048	STARR_ID2967	208.864	-0.145787	0.12805	-1.13852	0.254904	0.591509	FALSE	FALSE	FALSE	FALSE	inactive	0.228039
chr12	20068143	20070394	chr12	19915209	19917460	STARR_ID2970	686.21	-0.0378383	0.0965574	-0.391873	0.695152	0.873844	FALSE	FALSE	FALSE	FALSE	inactive	0.0585661
chr12	22058665	22059092	chr12	21905731	21906158	STARR_ID2973	61.8678	0.239433	0.267391	0.895439	0.370553	0.696351	FALSE	FALSE	FALSE	FALSE	inactive	0.157172
chr12	22457319	22457700	chr12	22304385	22304766	STARR_ID2974	14.5715	-0.744952	0.404315	-1.8425	0.0654018	0.293791	TRUE	TRUE	FALSE	FALSE	constitutive	0.531961
chr12	23378517	23379199	chr12	23225583	23226265	STARR_ID2976	1379.61	0.809008	0.111521	7.25428	4.03802e-13	9.12159e-12	TRUE	TRUE	FALSE	TRUE	constitutive	11.0399
chr12	24831961	24832461	chr12	24679027	24679527	STARR_ID2978	305.352	1.55286	0.131664	11.7941	4.18407e-32	4.4317e-30	TRUE	TRUE	FALSE	TRUE	induced	29.3534
chr12	25808646	25809146	chr12	25655712	25656212	STARR_ID2980	521.494	-0.0417939	0.152596	-0.273885	0.784173	0.914339	FALSE	FALSE	FALSE	FALSE	inactive	0.0388929
chr12	25992259	25992759	chr12	25839325	25839825	STARR_ID2982	84.1927	-0.0331777	0.218155	-0.152083	0.879121	0.954317	TRUE	TRUE	FALSE	FALSE	constitutive	0.0203074
chr12	26254278	26254778	chr12	26101345	26101845	STARR_ID2983	2636.6	0.814465	0.124905	6.52068	6.99908e-11	1.32032e-09	TRUE	TRUE	FALSE	TRUE	constitutive	8.87932
chr12	26427505	26428833	chr12	26274572	26275900	STARR_ID2986	1300.11	-0.107325	0.0973763	-1.10216	0.270391	0.607495	TRUE	TRUE	FALSE	FALSE	constitutive	0.216457
chr12	26569485	26569985	chr12	26416552	26417052	STARR_ID2988	65.3697	-0.348396	0.235632	-1.47856	0.139257	0.446404	FALSE	FALSE	FALSE	FALSE	inactive	0.350272
chr12	26897892	26898392	chr12	26744959	26745459	STARR_ID2990	189.162	0.128214	0.163505	0.784159	0.432947	0.736955	FALSE	FALSE	FALSE	FALSE	inactive	0.132559
chr12	26921891	26922570	chr12	26768958	26769637	STARR_ID2991	276.391	-0.305798	0.127469	-2.399	0.0164398	0.108428	FALSE	FALSE	FALSE	FALSE	inactive	0.964857
chr12	27776594	27777094	chr12	27623661	27624161	STARR_ID2992	3037.78	0.614943	0.108184	5.68424	1.31396e-08	2.11343e-07	TRUE	TRUE	FALSE	TRUE	constitutive	6.67501
chr12	28134771	28135271	chr12	27981838	27982338	STARR_ID2993	99.5623	-0.0687523	0.217524	-0.316067	0.751952	0.899762	TRUE	TRUE	FALSE	FALSE	constitutive	0.0458723
chr12	28355563	28356063	chr12	28202630	28203130	STARR_ID2995	195.376	0.0552484	0.131976	0.418625	0.67549	0.865952	FALSE	FALSE	FALSE	FALSE	inactive	0.0625061
chr12	29151480	29151980	chr12	28998547	28999047	STARR_ID2999	527.757	-0.205659	0.138097	-1.48924	0.136424	0.441142	FALSE	FALSE	FALSE	FALSE	inactive	0.355422
chr12	31612858	31613426	chr12	31459924	31460492	STARR_ID3002	249.807	0.111943	0.135063	0.82882	0.407206	0.722352	FALSE	FALSE	FALSE	FALSE	inactive	0.141251
chr12	31811777	31812530	chr12	31658843	31659596	STARR_ID3004	2191.75	-0.038821	0.11693	-0.332003	0.739887	0.894394	TRUE	TRUE	FALSE	FALSE	constitutive	0.048471
chr12	31902160	31902814	chr12	31749226	31749880	STARR_ID3006	7651.46	0.0296838	0.162597	0.182561	0.855143	0.94477	TRUE	TRUE	TRUE	TRUE	constitutive	0.0246741
chr12	31926416	31927145	chr12	31773482	31774211	STARR_ID3007	1017.08	0.844351	0.127146	6.64082	3.11951e-11	6.0771e-10	TRUE	TRUE	FALSE	FALSE	constitutive	9.2163
chr12	32831850	32832615	chr12	32678916	32679681	STARR_ID3015	8708.95	-0.0982215	0.0869374	-1.1298	0.258562	0.596512	TRUE	TRUE	TRUE	TRUE	constitutive	0.224381
chr12	39837105	39837587	chr12	39443303	39443785	STARR_ID3023	2367.92	0.354406	0.165487	2.1416	0.0322258	0.182728	TRUE	TRUE	FALSE	TRUE	constitutive	0.738194
chr12	40135464	40135890	chr12	39741662	39742088	STARR_ID3024	724.9	0.736676	0.173477	4.24653	2.17109e-05	0.000260004	TRUE	TRUE	FALSE	TRUE	constitutive	3.58502
chr12	40285901	40286401	chr12	39892099	39892599	STARR_ID3025	173.115	-0.20661	0.185409	-1.11435	0.26513	0.601597	FALSE	FALSE	FALSE	FALSE	inactive	0.220694
chr12	40306335	40306835	chr12	39912533	39913033	STARR_ID3026	298.275	-0.126751	0.119373	-1.06181	0.288324	0.625658	FALSE	FALSE	FALSE	FALSE	inactive	0.203663
chr12	41405785	41406285	chr12	41011983	41012483	STARR_ID3028	931.035	2.0952	0.188081	11.1399	8.01871e-29	6.13152e-27	FALSE	TRUE	FALSE	TRUE	induced	26.2124
chr12	42628671	42629254	chr12	42234869	42235452	STARR_ID3031	283.517	0.695644	0.161138	4.31706	1.58119e-05	0.000192914	FALSE	TRUE	FALSE	FALSE	constitutive	3.71464
chr12	43153467	43153967	chr12	42759665	42760165	STARR_ID3033	332.718	0.0258056	0.106392	0.242553	0.808352	0.923803	FALSE	FALSE	FALSE	FALSE	inactive	0.0344206
chr12	44189729	44190003	chr12	43795926	43796200	STARR_ID3035	128.718	0.303944	0.172854	1.75839	0.0786809	0.327337	TRUE	TRUE	TRUE	TRUE	constitutive	0.485004
chr12	45628056	45628417	chr12	45234273	45234634	STARR_ID3036	257.272	-0.364879	0.200717	-1.81788	0.0690832	0.303959	TRUE	TRUE	TRUE	FALSE	constitutive	0.517185
chr12	45990020	45990520	chr12	45596237	45596737	STARR_ID3038	449.261	0.313251	0.09155	3.42164	0.000622453	0.00612557	FALSE	TRUE	FALSE	FALSE	constitutive	2.21285
chr12	46570229	46570679	chr12	46176446	46176896	STARR_ID3039	177.166	-0.23031	0.145222	-1.58592	0.112759	0.400429	TRUE	TRUE	FALSE	FALSE	constitutive	0.397474
chr12	46595076	46595576	chr12	46201293	46201793	STARR_ID3040	224.939	0.210282	0.143058	1.4699	0.141588	0.449903	FALSE	FALSE	FALSE	FALSE	inactive	0.346882
chr12	46603688	46604188	chr12	46209905	46210405	STARR_ID3041	537.663	-0.0419327	0.0822633	-0.509737	0.610235	0.834362	FALSE	FALSE	FALSE	FALSE	inactive	0.0786455
chr12	46652846	46653346	chr12	46259063	46259563	STARR_ID3042	144.51	-0.222377	0.171285	-1.29828	0.194191	0.524902	FALSE	FALSE	FALSE	FALSE	inactive	0.279921
chr12	46748735	46749068	chr12	46354952	46355285	STARR_ID3044	178.547	-0.0702919	0.170303	-0.412746	0.679792	0.868531	FALSE	FALSE	FALSE	FALSE	inactive	0.0612146
chr12	46887482	46887982	chr12	46493699	46494199	STARR_ID3047	659.826	1.92298	0.175105	10.9818	4.67354e-28	3.3751e-26	TRUE	TRUE	TRUE	TRUE	induced	25.4717
chr12	47695456	47696317	chr12	47301673	47302534	STARR_ID3051	379.401	0.479828	0.121903	3.93615	8.27997e-05	0.000933716	FALSE	TRUE	FALSE	FALSE	constitutive	3.02979
chr12	48124050	48124550	chr12	47730267	47730767	STARR_ID3052	695.955	-0.0264664	0.110615	-0.239266	0.810899	0.924971	FALSE	FALSE	FALSE	FALSE	inactive	0.033872
chr12	48146953	48147740	chr12	47753170	47753957	STARR_ID3053	4220.53	-0.0529963	0.0844326	-0.627675	0.530217	0.795142	FALSE	FALSE	FALSE	FALSE	inactive	0.0995554
chr12	48337370	48339270	chr12	47943587	47945487	STARR_ID3055	3486.06	-0.0487632	0.0748023	-0.651895	0.514469	0.786826	FALSE	FALSE	FALSE	FALSE	inactive	0.104121
chr12	48343413	48343913	chr12	47949630	47950130	STARR_ID3056	2452.61	-0.0860172	0.0836367	-1.02846	0.303732	0.64055	FALSE	FALSE	FALSE	FALSE	inactive	0.193447
chr12	48415346	48416362	chr12	48021563	48022579	STARR_ID3058	543.504	0.143201	0.105757	1.35406	0.175717	0.499321	FALSE	FALSE	FALSE	FALSE	inactive	0.30162
chr12	49260695	49261195	chr12	48866912	48867412	STARR_ID3059	1017.56	-0.264429	0.120988	-2.18558	0.0288463	0.167945	TRUE	TRUE	TRUE	TRUE	constitutive	0.774833
chr12	49581634	49582357	chr12	49187851	49188574	STARR_ID3060	1112.14	0.0727071	0.167445	0.434215	0.664132	0.861143	FALSE	FALSE	FALSE	FALSE	inactive	0.0649247
chr12	50135680	50136180	chr12	49741897	49742397	STARR_ID3066	3210.74	0.253256	0.151258	1.67433	0.0940661	0.363863	TRUE	TRUE	FALSE	TRUE	constitutive	0.439062
chr12	50197701	50198201	chr12	49803918	49804418	STARR_ID3067	2354.33	2.13013	0.215049	9.90535	3.94589e-23	1.97281e-21	TRUE	TRUE	FALSE	TRUE	induced	20.7049
chr12	50288140	50288640	chr12	49894357	49894857	STARR_ID3068	1150.19	-0.137834	0.094956	-1.45156	0.146624	0.457767	TRUE	TRUE	FALSE	FALSE	constitutive	0.339355
chr12	50645605	50646105	chr12	50251822	50252322	STARR_ID3071	432.664	-0.169914	0.0973317	-1.74572	0.0808594	0.332914	FALSE	FALSE	FALSE	FALSE	inactive	0.477668
chr12	50968280	50968780	chr12	50574497	50574997	STARR_ID3072	453.857	-0.0295402	0.0944738	-0.312682	0.754522	0.900614	FALSE	FALSE	FALSE	FALSE	inactive	0.0454614
chr12	50975038	50975538	chr12	50581255	50581755	STARR_ID3073	242.064	-0.0604588	0.146605	-0.412393	0.680051	0.868607	FALSE	FALSE	FALSE	FALSE	inactive	0.0611768
chr12	51041196	51041702	chr12	50647413	50647919	STARR_ID3074	794.158	0.0349247	0.193032	0.180927	0.856425	0.94542	FALSE	FALSE	FALSE	FALSE	inactive	0.0243753
chr12	51159218	51159821	chr12	50765435	50766038	STARR_ID3075	190.319	0.265653	0.235209	1.12943	0.258716	0.596674	FALSE	FALSE	FALSE	FALSE	inactive	0.224263
chr12	51399476	51399976	chr12	51005693	51006193	STARR_ID3076	195.568	-0.132832	0.125352	-1.05967	0.289294	0.626501	TRUE	TRUE	FALSE	FALSE	constitutive	0.203078
chr12	51715684	51716184	chr12	51321900	51322400	STARR_ID3079	421.416	-0.295132	0.119809	-2.46336	0.0137642	0.0936762	TRUE	FALSE	FALSE	FALSE	constitutive	1.02837
chr12	51824103	51824603	chr12	51430319	51430819	STARR_ID3081	390.868	-0.123549	0.105966	-1.16594	0.24364	0.579476	TRUE	TRUE	FALSE	FALSE	constitutive	0.236964
chr12	52510026	52510526	chr12	52116242	52116742	STARR_ID3085	1526.16	-0.102836	0.111797	-0.919848	0.357652	0.684942	TRUE	TRUE	TRUE	TRUE	constitutive	0.164346
chr12	52513082	52513676	chr12	52119298	52119892	STARR_ID3086	4340.44	-0.136266	0.0928167	-1.46812	0.142073	0.450543	FALSE	FALSE	FALSE	FALSE	inactive	0.346264
chr12	52541004	52542951	chr12	52147220	52149167	STARR_ID3088	352196	-0.00996733	0.216102	-0.0461233	0.963212	0.987805	TRUE	TRUE	TRUE	TRUE	constitutive	0.00532869
chr12	52597070	52597570	chr12	52203286	52203786	STARR_ID3089	1720.89	-0.0183467	0.100784	-0.182041	0.855551	0.944892	FALSE	FALSE	FALSE	FALSE	inactive	0.0246178
chr12	52610995	52611495	chr12	52217211	52217711	STARR_ID3091	371.922	-0.22828	0.13505	-1.69034	0.090963	0.356644	TRUE	FALSE	FALSE	FALSE	constitutive	0.447765
chr12	52637777	52638277	chr12	52243993	52244493	STARR_ID3092	2952.26	-0.190312	0.146398	-1.29996	0.193613	0.524432	TRUE	TRUE	TRUE	TRUE	constitutive	0.280311
chr12	52641055	52641604	chr12	52247271	52247820	STARR_ID3093	2689.42	-0.0959737	0.0824257	-1.16437	0.244276	0.580409	TRUE	TRUE	TRUE	TRUE	constitutive	0.236266
chr12	52674246	52674746	chr12	52280462	52280962	STARR_ID3096	4357.73	-0.249867	0.138312	-1.80655	0.0708322	0.307851	TRUE	TRUE	TRUE	TRUE	constitutive	0.511659
chr12	53011028	53011418	chr12	52617244	52617634	STARR_ID3098	1217.79	0.143157	0.109019	1.31314	0.189135	0.518843	FALSE	FALSE	FALSE	FALSE	inactive	0.284964
chr12	53288980	53289480	chr12	52895196	52895696	STARR_ID3100	403.167	0.389372	0.101219	3.84682	0.000119661	0.00132228	TRUE	TRUE	FALSE	FALSE	constitutive	2.87868
chr12	53319895	53320395	chr12	52926111	52926611	STARR_ID3101	424.933	-0.161505	0.11344	-1.4237	0.154534	0.468352	FALSE	FALSE	FALSE	FALSE	inactive	0.329428
chr12	53363764	53364264	chr12	52969980	52970480	STARR_ID3102	1364.16	-0.0761106	0.117403	-0.648283	0.516802	0.788559	FALSE	FALSE	FALSE	FALSE	inactive	0.103166
chr12	53365590	53366090	chr12	52971806	52972306	STARR_ID3103	778.677	0.692494	0.161809	4.27969	1.87151e-05	0.000225639	TRUE	TRUE	TRUE	TRUE	constitutive	3.64659
chr12	53397803	53398584	chr12	53004019	53004800	STARR_ID3104	792.153	0.312557	0.103015	3.0341	0.00241256	0.0208316	FALSE	TRUE	FALSE	FALSE	constitutive	1.68128
chr12	53492993	53493369	chr12	53099209	53099585	STARR_ID3105	394.629	0.0943421	0.132396	0.712573	0.47611	0.763217	TRUE	TRUE	FALSE	FALSE	constitutive	0.117352
chr12	53551443	53553555	chr12	53157659	53159771	STARR_ID3106	1808.75	0.44561	0.113947	3.91068	9.20363e-05	0.00103218	FALSE	TRUE	FALSE	FALSE	constitutive	2.98625
chr12	53568757	53569314	chr12	53174973	53175530	STARR_ID3107	1058.11	-0.124807	0.0674976	-1.84906	0.0644486	0.291353	FALSE	FALSE	FALSE	FALSE	inactive	0.53558
chr12	53752608	53753036	chr12	53358824	53359252	STARR_ID3109	550.076	1.1429	0.178291	6.41033	1.45208e-10	2.67224e-09	FALSE	TRUE	FALSE	TRUE	induced	8.57312
chr12	53764830	53765330	chr12	53371046	53371546	STARR_ID3110	2358.33	-0.0993037	0.0569729	-1.743	0.0813336	0.334001	TRUE	TRUE	TRUE	TRUE	constitutive	0.476253
chr12	53931967	53932467	chr12	53538183	53538683	STARR_ID3114	884.537	0.00319057	0.206426	0.0154562	0.987668	0.996378	TRUE	TRUE	FALSE	FALSE	constitutive	0.00157568
chr12	54198151	54198651	chr12	53804367	53804867	STARR_ID3118	1652.88	-0.220636	0.136524	-1.61609	0.106075	0.387334	TRUE	TRUE	TRUE	TRUE	constitutive	0.411914
chr12	54218877	54219634	chr12	53825093	53825850	STARR_ID3119	10730.9	-0.160534	0.103569	-1.55002	0.121138	0.416846	TRUE	TRUE	TRUE	TRUE	constitutive	0.380024
chr12	54383998	54384541	chr12	53990214	53990757	STARR_ID3120	1638.08	0.135528	0.0973159	1.39266	0.163722	0.48002	FALSE	FALSE	FALSE	FALSE	inactive	0.318741
chr12	54431922	54432261	chr12	54038138	54038477	STARR_ID3121	138.063	-0.074061	0.181544	-0.40795	0.68331	0.869739	FALSE	FALSE	FALSE	FALSE	inactive	0.0606109
chr12	54764024	54764480	chr12	54370240	54370696	STARR_ID3127	2060.61	-0.0890606	0.0948009	-0.939449	0.3475	0.677055	TRUE	TRUE	FALSE	FALSE	constitutive	0.169376
chr12	54781335	54781956	chr12	54387551	54388172	STARR_ID3128	728.611	0.0103329	0.0998392	0.103496	0.917569	0.968361	FALSE	FALSE	FALSE	FALSE	inactive	0.0139627
chr12	55285870	55286370	chr12	54892086	54892586	STARR_ID3131	591.902	-0.402346	0.134859	-2.98345	0.00285018	0.0240867	TRUE	TRUE	TRUE	TRUE	constitutive	1.61822
chr12	55327191	55327691	chr12	54933407	54933907	STARR_ID3132	85.3538	0.331385	0.205459	1.6129	0.106766	0.387966	TRUE	TRUE	FALSE	FALSE	constitutive	0.411207
chr12	56387247	56388140	chr12	55993463	55994356	STARR_ID3137	856.342	0.249202	0.091649	2.7191	0.00654607	0.0502697	FALSE	FALSE	FALSE	FALSE	inactive	1.29869
chr12	56435247	56436034	chr12	56041463	56042250	STARR_ID3138	2817.64	0.0457897	0.09482	0.482912	0.629158	0.84338	TRUE	TRUE	FALSE	FALSE	constitutive	0.0739767
chr12	56552764	56553264	chr12	56158980	56159480	STARR_ID3141	982.007	0.0730204	0.183483	0.397968	0.690654	0.872189	FALSE	FALSE	FALSE	FALSE	inactive	0.0593896
chr12	56685211	56685711	chr12	56291427	56291927	STARR_ID3142	390.184	-0.134012	0.0946672	-1.41561	0.15689	0.471704	FALSE	FALSE	FALSE	FALSE	inactive	0.326331
chr12	57321415	57321840	chr12	56927631	56928056	STARR_ID3145	341.435	0.39141	0.11824	3.31029	0.000931999	0.00886081	FALSE	TRUE	FALSE	FALSE	constitutive	2.05253
chr12	57379580	57380080	chr12	56985796	56986296	STARR_ID3146	2737.25	-0.243951	0.172039	-1.41799	0.156193	0.470486	TRUE	TRUE	TRUE	TRUE	constitutive	0.327453
chr12	57482382	57482811	chr12	57088599	57089028	STARR_ID3149	3052.66	0.735361	0.194825	3.77447	0.000160346	0.00174224	TRUE	TRUE	FALSE	TRUE	constitutive	2.75889
chr12	57495570	57496070	chr12	57101787	57102287	STARR_ID3150	1046.15	0.254287	0.0907478	2.80213	0.00507671	0.0402171	TRUE	TRUE	FALSE	FALSE	constitutive	1.39559
chr12	58275098	58275598	chr12	57881315	57881815	STARR_ID3151	402.478	0.068272	0.109785	0.621869	0.534028	0.796918	FALSE	FALSE	FALSE	FALSE	inactive	0.0985863
chr12	58281931	58282431	chr12	57888148	57888648	STARR_ID3152	412.861	-0.0573435	0.112126	-0.51142	0.609057	0.833973	TRUE	TRUE	FALSE	FALSE	constitutive	0.0788482
chr12	58311780	58312280	chr12	57917997	57918497	STARR_ID3153	502.772	0.347543	0.109885	3.1628	0.00156259	0.0142134	FALSE	FALSE	FALSE	FALSE	inactive	1.8473
chr12	58704560	58705060	chr12	58310777	58311277	STARR_ID3154	1733.18	-0.172594	0.137825	-1.25227	0.210472	0.543718	TRUE	TRUE	TRUE	TRUE	constitutive	0.264626
chr12	59159628	59160128	chr12	58765846	58766346	STARR_ID3155	63.2814	0.194729	0.245544	0.793052	0.427748	0.734346	FALSE	TRUE	FALSE	FALSE	constitutive	0.1341
chr12	59424139	59424639	chr12	59030358	59030858	STARR_ID3156	956.683	-0.184708	0.0965173	-1.91373	0.0556544	0.266422	FALSE	FALSE	FALSE	FALSE	inactive	0.57443
chr12	59558631	59559135	chr12	59164850	59165354	STARR_ID3157	144.771	0.103477	0.175205	0.590605	0.554785	0.809039	TRUE	TRUE	FALSE	FALSE	constitutive	0.0920305
chr12	63193379	63193803	chr12	62799599	62800023	STARR_ID3158	155.258	-0.107095	0.157394	-0.680426	0.496235	0.776076	FALSE	FALSE	FALSE	FALSE	inactive	0.110096
chr12	63480310	63480810	chr12	63086530	63087030	STARR_ID3161	938.722	0.448663	0.126837	3.5373	0.000404236	0.00410815	FALSE	FALSE	FALSE	FALSE	inactive	2.38635
chr12	64256057	64256557	chr12	63862277	63862777	STARR_ID3162	414.201	-0.102914	0.111479	-0.923169	0.355919	0.683952	TRUE	TRUE	FALSE	FALSE	constitutive	0.164974
chr12	64474605	64475605	chr12	64080825	64081825	STARR_ID3163	526.95	-0.19096	0.125445	-1.52226	0.127944	0.429554	TRUE	TRUE	TRUE	TRUE	constitutive	0.366982
chr12	64993963	64994463	chr12	64600183	64600683	STARR_ID3164	54.2029	-0.323563	0.283139	-1.14277	0.253133	0.589837	FALSE	FALSE	FALSE	FALSE	inactive	0.229268
chr12	65073330	65073830	chr12	64679550	64680050	STARR_ID3165	530.75	-0.00309283	0.172387	-0.0179413	0.985686	0.99563	TRUE	TRUE	FALSE	FALSE	constitutive	0.0019019
chr12	65283561	65284061	chr12	64889781	64890281	STARR_ID3168	1042.54	-0.272616	0.0847667	-3.21608	0.00129957	0.0119965	TRUE	TRUE	TRUE	TRUE	constitutive	1.92095
chr12	67479197	67480152	chr12	67085417	67086372	STARR_ID3171	158.49	0.124671	0.137799	0.904735	0.365606	0.691965	FALSE	FALSE	FALSE	FALSE	inactive	0.159916
chr12	67877535	67878035	chr12	67483755	67484255	STARR_ID3173	461.975	-0.0250742	0.154519	-0.162273	0.871091	0.951906	TRUE	TRUE	FALSE	FALSE	constitutive	0.0214058
chr12	67913595	67914095	chr12	67519815	67520315	STARR_ID3174	245.986	-0.0657204	0.136994	-0.479731	0.631418	0.844244	FALSE	FALSE	FALSE	FALSE	inactive	0.0735318
chr12	68959032	68959943	chr12	68565252	68566163	STARR_ID3180	80.5226	0.233337	0.190239	1.22655	0.219993	0.553622	FALSE	FALSE	FALSE	FALSE	inactive	0.256787
chr12	69186870	69187411	chr12	68793090	68793631	STARR_ID3182	636.896	0.180781	0.0920934	1.96302	0.0496436	0.246563	FALSE	FALSE	FALSE	FALSE	inactive	0.608072
chr12	69197981	69198417	chr12	68804201	68804637	STARR_ID3183	137.775	0.222114	0.145846	1.52293	0.127776	0.429193	FALSE	FALSE	FALSE	FALSE	inactive	0.367347
chr12	69462054	69462725	chr12	69068274	69068945	STARR_ID3185	245.119	1.32793	0.191136	6.94756	3.71651e-12	7.96737e-11	FALSE	TRUE	FALSE	TRUE	induced	10.0987
chr12	69495310	69495810	chr12	69101530	69102030	STARR_ID3186	19.1153	-0.064548	0.51101	-0.126315	0.899483	0.963284	TRUE	TRUE	FALSE	FALSE	constitutive	0.0162456
chr12	69833713	69835167	chr12	69439933	69441387	STARR_ID3189	3189.09	0.811897	0.136941	5.9288	3.05149e-09	5.21305e-08	TRUE	TRUE	FALSE	TRUE	constitutive	7.28291
chr12	70643609	70643990	chr12	70249829	70250210	STARR_ID3193	23.9774	0.010227	0.352342	0.0290259	0.976844	0.992461	TRUE	TRUE	FALSE	FALSE	constitutive	0.00328669
chr12	73777535	73778035	chr12	73383755	73384255	STARR_ID3197	41.5827	0.0171272	0.257029	0.0666355	0.946872	0.981252	FALSE	FALSE	FALSE	FALSE	inactive	0.00821926
chr12	75265552	75266052	chr12	74871772	74872272	STARR_ID3198	152.306	1.66588	0.246649	6.75403	1.43794e-11	2.90823e-10	TRUE	TRUE	TRUE	TRUE	induced	9.53637
chr12	75629863	75630363	chr12	75236083	75236583	STARR_ID3199	60.6646	-0.00236986	0.236452	-0.0100226	0.992003	0.998146	FALSE	FALSE	FALSE	FALSE	inactive	0.00080586
chr12	76099714	76100586	chr12	75705934	75706806	STARR_ID3201	1143.27	0.518055	0.1107	4.67979	2.87162e-06	3.77402e-05	TRUE	TRUE	FALSE	FALSE	constitutive	4.4232
chr12	76106010	76106510	chr12	75712230	75712730	STARR_ID3202	14.2751	-0.145951	0.39488	-0.369608	0.711675	0.881856	FALSE	FALSE	FALSE	FALSE	inactive	0.0546025
chr12	76114663	76115163	chr12	75720883	75721383	STARR_ID3203	331.198	0.0201289	0.127002	0.158493	0.874068	0.952397	FALSE	FALSE	FALSE	FALSE	inactive	0.0211822
chr12	76178345	76178845	chr12	75784565	75785065	STARR_ID3204	408.129	-0.0327487	0.132233	-0.247659	0.804398	0.922346	FALSE	FALSE	FALSE	FALSE	inactive	0.0351061
chr12	76371727	76372227	chr12	75977947	75978447	STARR_ID3206	8805.2	-0.239116	0.157749	-1.5158	0.129571	0.431645	TRUE	TRUE	TRUE	TRUE	constitutive	0.364873
chr12	78780417	78781306	chr12	78386637	78387526	STARR_ID3211	511.631	0.266187	0.0947067	2.81065	0.00494422	0.039373	FALSE	FALSE	FALSE	FALSE	inactive	1.4048
chr12	79845745	79846245	chr12	79451965	79452465	STARR_ID3213	366.316	0.020141	0.10105	0.199317	0.842015	0.938131	FALSE	FALSE	FALSE	FALSE	inactive	0.0277366
chr12	79915388	79915849	chr12	79521608	79522069	STARR_ID3214	292.154	0.133998	0.117969	1.13588	0.256006	0.592817	FALSE	FALSE	FALSE	FALSE	inactive	0.227079
chr12	79926600	79927100	chr12	79532820	79533320	STARR_ID3215	300.602	0.0586392	0.196117	0.299001	0.76494	0.905153	TRUE	TRUE	FALSE	FALSE	constitutive	0.0432779
chr12	79940920	79941420	chr12	79547140	79547640	STARR_ID3216	10920.4	-0.168767	0.236769	-0.71279	0.475976	0.763087	TRUE	TRUE	TRUE	TRUE	constitutive	0.117426
chr12	80163294	80163829	chr12	79769514	79770049	STARR_ID3217	1194.11	1.96664	0.251002	7.83513	4.68343e-15	1.24246e-13	TRUE	TRUE	FALSE	TRUE	induced	12.9057
chr12	81602881	81604119	chr12	81209102	81210340	STARR_ID3220	113.951	0.051877	0.161814	0.320596	0.748517	0.898434	FALSE	FALSE	FALSE	FALSE	inactive	0.0465139
chr12	84858844	84859278	chr12	84465065	84465499	STARR_ID3221	145.728	0.75404	0.202278	3.72774	0.000193201	0.0020709	TRUE	TRUE	FALSE	FALSE	constitutive	2.68384
chr12	87833939	87834439	chr12	87440162	87440662	STARR_ID3223	1629.96	-0.0887785	0.165632	-0.535998	0.59196	0.82534	TRUE	TRUE	TRUE	TRUE	constitutive	0.0833672
chr12	88948010	88948510	chr12	88554233	88554733	STARR_ID3225	47.8866	-0.151226	0.216819	-0.697475	0.485505	0.769053	FALSE	FALSE	FALSE	FALSE	inactive	0.114044
chr12	89078233	89078733	chr12	88684456	88684956	STARR_ID3226	168.671	0.0226842	0.141143	0.160718	0.872315	0.952104	FALSE	FALSE	FALSE	FALSE	inactive	0.0213157
chr12	89144496	89144996	chr12	88750719	88751219	STARR_ID3227	282.488	1.68405	0.207519	8.11517	4.85112e-16	1.40417e-14	FALSE	TRUE	FALSE	TRUE	induced	13.8526
chr12	89157268	89157768	chr12	88763491	88763991	STARR_ID3228	272.187	0.0252299	0.122994	0.205131	0.837469	0.936166	FALSE	FALSE	FALSE	FALSE	inactive	0.0286472
chr12	89511238	89511738	chr12	89117461	89117961	STARR_ID3230	688.058	-0.115551	0.0961508	-1.20177	0.229452	0.565601	TRUE	FALSE	FALSE	FALSE	constitutive	0.24749
chr12	89619195	89620224	chr12	89225418	89226447	STARR_ID3231	1051.43	-0.127561	0.141136	-0.903817	0.366092	0.692245	TRUE	TRUE	FALSE	FALSE	constitutive	0.15974
chr12	89630809	89631309	chr12	89237032	89237532	STARR_ID3232	586.551	-0.10931	0.11909	-0.917877	0.358683	0.685855	TRUE	TRUE	TRUE	TRUE	constitutive	0.163768
chr12	89858675	89859269	chr12	89464898	89465492	STARR_ID3237	2968.56	0.942376	0.137654	6.84596	7.59669e-12	1.57656e-10	TRUE	TRUE	TRUE	TRUE	constitutive	9.80229
chr12	89900670	89901826	chr12	89506893	89508049	STARR_ID3238	200.064	0.0376769	0.131269	0.28702	0.774097	0.909531	FALSE	FALSE	FALSE	FALSE	inactive	0.0411823
chr12	89960380	89960961	chr12	89566603	89567184	STARR_ID3239	417.284	0.0441111	0.126876	0.34767	0.728088	0.889272	TRUE	TRUE	FALSE	FALSE	constitutive	0.0509656
chr12	91816022	91816483	chr12	91422245	91422706	STARR_ID3244	168.272	-0.347846	0.137407	-2.53151	0.0113574	0.0803163	TRUE	FALSE	FALSE	FALSE	constitutive	1.0952
chr12	92172752	92173045	chr12	91778975	91779268	STARR_ID3245	65.9948	0.0705598	0.267621	0.263656	0.792045	0.917614	TRUE	TRUE	FALSE	FALSE	constitutive	0.0373401
chr12	92211282	92211782	chr12	91817506	91818006	STARR_ID3246	642.447	-0.230819	0.0833444	-2.76946	0.00561499	0.0440905	FALSE	FALSE	FALSE	FALSE	inactive	1.35566
chr12	92277464	92277896	chr12	91883688	91884120	STARR_ID3248	25.9675	0.785059	0.348294	2.25401	0.0241955	0.147725	FALSE	FALSE	FALSE	FALSE	inactive	0.830547
chr12	92538222	92538722	chr12	92144446	92144946	STARR_ID3249	2190.68	-0.167722	0.111356	-1.50618	0.13202	0.435411	TRUE	TRUE	TRUE	TRUE	constitutive	0.361101
chr12	92937185	92937685	chr12	92543409	92543909	STARR_ID3251	443.855	-0.204187	0.183377	-1.11348	0.265501	0.601838	TRUE	TRUE	TRUE	TRUE	constitutive	0.22052
chr12	93538851	93539351	chr12	93145075	93145575	STARR_ID3253	115.054	-0.260656	0.179984	-1.44822	0.147555	0.458972	TRUE	TRUE	FALSE	FALSE	constitutive	0.338214
chr12	93708362	93708868	chr12	93314586	93315092	STARR_ID3254	6604.52	0.145977	0.110925	1.316	0.188175	0.517638	TRUE	TRUE	TRUE	TRUE	constitutive	0.285974
chr12	93767981	93768481	chr12	93374205	93374705	STARR_ID3255	339.91	-0.175622	0.118645	-1.48023	0.138811	0.445335	FALSE	FALSE	FALSE	FALSE	inactive	0.351313
chr12	93935638	93936138	chr12	93541862	93542362	STARR_ID3257	186.637	-0.184417	0.13586	-1.35741	0.174652	0.497769	TRUE	TRUE	FALSE	FALSE	constitutive	0.302972
chr12	93957538	93958038	chr12	93563762	93564262	STARR_ID3258	5260.24	-0.478657	0.116578	-4.10589	4.02757e-05	0.000470894	TRUE	TRUE	TRUE	TRUE	constitutive	3.32708
chr12	94091663	94092163	chr12	93697887	93698387	STARR_ID3260	286.669	-0.0316784	0.192179	-0.164838	0.869072	0.951621	FALSE	FALSE	FALSE	FALSE	inactive	0.021536
chr12	94348084	94349023	chr12	93954308	93955247	STARR_ID3264	5596.32	1.63843	0.216164	7.57959	3.46639e-14	8.65025e-13	TRUE	TRUE	TRUE	TRUE	induced	12.063
chr12	94453469	94453969	chr12	94059693	94060193	STARR_ID3265	219.768	0.0468749	0.117898	0.397589	0.690933	0.872234	FALSE	FALSE	FALSE	FALSE	inactive	0.0593669
chr12	94574263	94574763	chr12	94180487	94180987	STARR_ID3266	343.609	-0.0627593	0.141178	-0.444542	0.656651	0.856714	FALSE	FALSE	FALSE	FALSE	inactive	0.0671643
chr12	94955786	94956286	chr12	94562010	94562510	STARR_ID3267	552.295	-0.122881	0.110274	-1.11432	0.265142	0.601597	FALSE	FALSE	FALSE	FALSE	inactive	0.220694
chr12	95071520	95072020	chr12	94677744	94678244	STARR_ID3268	445.877	-0.11309	0.132378	-0.854301	0.392938	0.712842	FALSE	FALSE	FALSE	FALSE	inactive	0.147006
chr12	95098246	95098746	chr12	94704470	94704970	STARR_ID3269	161.159	-0.198469	0.133376	-1.48805	0.136738	0.441578	TRUE	FALSE	FALSE	FALSE	constitutive	0.354992
chr12	95492099	95492599	chr12	95098323	95098823	STARR_ID3271	1799.99	0.749108	0.174058	4.30379	1.679e-05	0.000203977	TRUE	TRUE	FALSE	TRUE	constitutive	3.69042
chr12	95496820	95497443	chr12	95103044	95103667	STARR_ID3272	1928.63	-0.185682	0.193568	-0.959263	0.337426	0.670042	TRUE	FALSE	FALSE	FALSE	constitutive	0.173898
chr12	95566217	95566717	chr12	95172441	95172941	STARR_ID3273	77.199	0.98072	0.206371	4.75221	2.01208e-06	2.68918e-05	FALSE	TRUE	FALSE	FALSE	constitutive	4.57038
chr12	96111626	96112325	chr12	95717848	95718547	STARR_ID3276	111.27	-0.258369	0.163339	-1.5818	0.113695	0.402508	FALSE	FALSE	FALSE	FALSE	inactive	0.395225
chr12	96278595	96279095	chr12	95884817	95885317	STARR_ID3278	134.196	0.0186018	0.178836	0.104016	0.917157	0.968068	FALSE	FALSE	FALSE	FALSE	inactive	0.014094
chr12	96441980	96442480	chr12	96048202	96048702	STARR_ID3279	604.845	-0.155804	0.114879	-1.35624	0.175022	0.498138	FALSE	FALSE	FALSE	FALSE	inactive	0.302651
chr12	96487730	96488230	chr12	96093952	96094452	STARR_ID3280	547.102	-0.0351064	0.123241	-0.284861	0.775751	0.910188	FALSE	FALSE	FALSE	FALSE	inactive	0.0408688
chr12	96657155	96657655	chr12	96263377	96263877	STARR_ID3282	217.325	-0.163812	0.153847	-1.06477	0.28698	0.624707	FALSE	FALSE	FALSE	FALSE	inactive	0.204323
chr12	97894237	97894842	chr12	97500459	97501064	STARR_ID3285	477.012	0.565642	0.14106	4.00993	6.07376e-05	0.000695904	FALSE	TRUE	FALSE	FALSE	constitutive	3.15745
chr12	97949880	97950961	chr12	97556102	97557183	STARR_ID3286	408.914	-0.0365899	0.129238	-0.28312	0.777085	0.910485	TRUE	TRUE	FALSE	FALSE	constitutive	0.0407273
chr12	98752145	98752645	chr12	98358367	98358867	STARR_ID3289	72.5421	0.600916	0.181219	3.31597	0.000913241	0.00868825	FALSE	TRUE	FALSE	FALSE	constitutive	2.06107
chr12	99737386	99738131	chr12	99343608	99344353	STARR_ID3294	243.1	-0.0996183	0.145257	-0.685809	0.492833	0.773729	FALSE	FALSE	FALSE	FALSE	inactive	0.111411
chr12	100353335	100353835	chr12	99959557	99960057	STARR_ID3296	84.0851	-0.0839386	0.14304	-0.586818	0.557326	0.809796	TRUE	TRUE	TRUE	TRUE	constitutive	0.0916242
chr12	100623705	100624205	chr12	100229927	100230427	STARR_ID3297	636.167	0.00230891	0.120406	0.019176	0.984701	0.995323	TRUE	TRUE	FALSE	FALSE	constitutive	0.00203596
chr12	102002192	102002692	chr12	101608414	101608914	STARR_ID3301	552.145	-0.171975	0.136565	-1.25929	0.207925	0.541327	TRUE	TRUE	FALSE	FALSE	constitutive	0.266541
chr12	102009821	102010321	chr12	101616043	101616543	STARR_ID3302	143.615	-0.04548	0.143762	-0.316356	0.751732	0.899762	FALSE	FALSE	FALSE	FALSE	inactive	0.0458723
chr12	102942251	102942851	chr12	102548473	102549073	STARR_ID3304	6598.42	1.22249	0.179588	6.80719	9.95202e-12	2.03874e-10	TRUE	TRUE	FALSE	TRUE	induced	9.69064
chr12	102957817	102958150	chr12	102564039	102564372	STARR_ID3305	233.328	-0.127477	0.244357	-0.521685	0.60189	0.830696	TRUE	TRUE	TRUE	TRUE	constitutive	0.0805577
chr12	103569363	103569863	chr12	103175585	103176085	STARR_ID3306	3587.35	2.41809	0.214648	11.2654	1.94493e-29	1.58917e-27	TRUE	TRUE	TRUE	TRUE	induced	26.7988
chr12	103766795	103767464	chr12	103373017	103373686	STARR_ID3307	236.368	0.021487	0.124875	0.172067	0.863385	0.949511	FALSE	FALSE	FALSE	FALSE	inactive	0.0225002
chr12	104323325	104324292	chr12	103929547	103930514	STARR_ID3308	4527.08	-0.0704856	0.0718975	-0.980363	0.326907	0.660979	TRUE	TRUE	FALSE	FALSE	constitutive	0.179812
chr12	104607706	104608206	chr12	104213928	104214428	STARR_ID3309	243.158	-0.153707	0.118373	-1.2985	0.194115	0.524902	FALSE	FALSE	FALSE	FALSE	inactive	0.279921
chr12	104613730	104614230	chr12	104219952	104220452	STARR_ID3310	426.013	-0.42353	0.20257	-2.09078	0.036548	0.199314	TRUE	TRUE	TRUE	TRUE	constitutive	0.700463
chr12	104690432	104690932	chr12	104296654	104297154	STARR_ID3313	265.814	0.0506643	0.11037	0.459041	0.646205	0.851795	FALSE	FALSE	FALSE	FALSE	inactive	0.0696649
chr12	105050082	105050582	chr12	104656304	104656804	STARR_ID3314	1040.43	0.0519307	0.088377	0.587604	0.556798	0.809619	TRUE	TRUE	FALSE	FALSE	constitutive	0.0917192
chr12	106135478	106136694	chr12	105741700	105742916	STARR_ID3316	966.811	-0.0377757	0.0870653	-0.433877	0.664378	0.861204	TRUE	TRUE	FALSE	FALSE	constitutive	0.0648942
chr12	106290356	106290856	chr12	105896578	105897078	STARR_ID3317	920.122	-0.0774932	0.0906856	-0.854526	0.392813	0.712718	FALSE	FALSE	FALSE	FALSE	inactive	0.147082
chr12	106589422	106589922	chr12	106195644	106196144	STARR_ID3321	1001.37	-0.0160085	0.0871985	-0.183587	0.854338	0.944501	TRUE	FALSE	FALSE	FALSE	constitutive	0.0247976
chr12	107167896	107168301	chr12	106774118	106774523	STARR_ID3324	1735.4	-0.175042	0.104455	-1.67576	0.0937857	0.363721	TRUE	TRUE	FALSE	FALSE	constitutive	0.439231
chr12	107421285	107421785	chr12	107027507	107028007	STARR_ID3325	186.378	0.367402	0.242685	1.51391	0.130049	0.43206	TRUE	TRUE	TRUE	TRUE	constitutive	0.364456
chr12	107879688	107881520	chr12	107485911	107487743	STARR_ID3327	358.696	-0.256519	0.133542	-1.92089	0.0547452	0.263925	FALSE	FALSE	FALSE	FALSE	inactive	0.578519
chr12	109098270	109098770	chr12	108704494	108704994	STARR_ID3330	448.405	-0.138419	0.134564	-1.02864	0.303647	0.64055	FALSE	FALSE	FALSE	FALSE	inactive	0.193447
chr12	110151156	110151463	chr12	109713351	109713658	STARR_ID3336	263.006	0.0447537	0.131891	0.339323	0.734366	0.891915	FALSE	FALSE	FALSE	FALSE	inactive	0.0496765
chr12	110302320	110302820	chr12	109864515	109865015	STARR_ID3337	603.276	-0.207119	0.118004	-1.75518	0.0792288	0.328756	FALSE	FALSE	FALSE	FALSE	inactive	0.483126
chr12	110309642	110310142	chr12	109871837	109872337	STARR_ID3338	505.259	-0.213359	0.102969	-2.07207	0.0382593	0.205881	TRUE	FALSE	FALSE	FALSE	constitutive	0.686384
chr12	110685295	110685795	chr12	110247490	110247990	STARR_ID3340	1684.17	-0.00547822	0.101872	-0.0537754	0.957114	0.985368	TRUE	TRUE	FALSE	FALSE	constitutive	0.00640158
chr12	110777174	110777674	chr12	110339369	110339869	STARR_ID3341	483.448	0.229734	0.104429	2.19989	0.0278144	0.163261	FALSE	TRUE	FALSE	FALSE	constitutive	0.787116
chr12	110782686	110783529	chr12	110344881	110345724	STARR_ID3342	1926.69	-0.0873488	0.0665274	-1.31298	0.189191	0.518843	FALSE	FALSE	FALSE	FALSE	inactive	0.284964
chr12	111003685	111004185	chr12	110565880	110566380	STARR_ID3343	314.377	-0.22699	0.108261	-2.0967	0.0360204	0.197522	FALSE	FALSE	FALSE	FALSE	inactive	0.704383
chr12	111029295	111029795	chr12	110591490	110591990	STARR_ID3344	194.987	-0.0339917	0.152315	-0.223168	0.823405	0.929678	FALSE	FALSE	FALSE	FALSE	inactive	0.0316673
chr12	111559898	111560735	chr12	111122094	111122931	STARR_ID3345	388.449	-0.116884	0.113809	-1.02702	0.30441	0.641243	TRUE	FALSE	FALSE	FALSE	constitutive	0.192977
chr12	111840736	111841399	chr12	111402932	111403595	STARR_ID3346	1065.02	0.0491088	0.088617	0.554168	0.579464	0.820022	FALSE	FALSE	FALSE	FALSE	inactive	0.0861747
chr12	112195957	112196457	chr12	111758153	111758653	STARR_ID3347	3046.56	-0.00290924	0.125179	-0.0232407	0.981458	0.994675	TRUE	TRUE	TRUE	TRUE	constitutive	0.00231873
chr12	113659438	113659820	chr12	113221633	113222015	STARR_ID3353	2404.82	0.339741	0.0717473	4.73524	2.18796e-06	2.90489e-05	TRUE	TRUE	FALSE	FALSE	constitutive	4.53687
chr12	113660845	113661345	chr12	113223040	113223540	STARR_ID3354	216.38	-0.0889346	0.140629	-0.632406	0.527122	0.793868	FALSE	FALSE	FALSE	FALSE	inactive	0.100251
chr12	114966544	114967044	chr12	114528739	114529239	STARR_ID3358	854.528	-0.258861	0.0895455	-2.89083	0.00384223	0.0316111	TRUE	TRUE	TRUE	FALSE	constitutive	1.50016
chr12	115539755	115540255	chr12	115101950	115102450	STARR_ID3362	770.463	0.230264	0.105858	2.17522	0.0296139	0.171229	FALSE	TRUE	FALSE	FALSE	constitutive	0.766423
chr12	115541682	115542182	chr12	115103877	115104377	STARR_ID3363	371.363	-0.183856	0.112477	-1.6346	0.102132	0.379913	FALSE	FALSE	FALSE	FALSE	inactive	0.420316
chr12	115821403	115821903	chr12	115383598	115384098	STARR_ID3365	437.535	-0.0827295	0.0885288	-0.934493	0.35005	0.679432	FALSE	FALSE	FALSE	FALSE	inactive	0.167854
chr12	115836095	115836595	chr12	115398290	115398790	STARR_ID3366	476.744	0.0891062	0.0849998	1.04831	0.294496	0.631807	TRUE	TRUE	FALSE	FALSE	constitutive	0.199416
chr12	115842645	115843145	chr12	115404840	115405340	STARR_ID3367	452.594	-0.25823	0.251102	-1.02839	0.303767	0.64055	TRUE	TRUE	FALSE	FALSE	constitutive	0.193447
chr12	115864495	115864995	chr12	115426690	115427190	STARR_ID3368	221.956	-0.000498837	0.127432	-0.00391453	0.996877	0.99943	TRUE	TRUE	FALSE	FALSE	constitutive	0.000247503
chr12	115910920	115911420	chr12	115473115	115473615	STARR_ID3370	484.603	0.0467532	0.117239	0.398784	0.690052	0.872035	FALSE	FALSE	FALSE	FALSE	inactive	0.0594659
chr12	115980514	115981014	chr12	115542709	115543209	STARR_ID3371	839.669	-0.0403067	0.0958275	-0.420617	0.674035	0.864957	TRUE	TRUE	TRUE	TRUE	constitutive	0.0630057
chr12	116268158	116268658	chr12	115830353	115830853	STARR_ID3373	272.557	-0.0952513	0.117011	-0.814037	0.415624	0.728021	FALSE	FALSE	FALSE	FALSE	inactive	0.137856
chr12	116307817	116308508	chr12	115870012	115870703	STARR_ID3375	7305.97	1.40986	0.198497	7.1027	1.22342e-12	2.70382e-11	FALSE	TRUE	FALSE	TRUE	induced	10.568
chr12	116310804	116311304	chr12	115872999	115873499	STARR_ID3376	1843.54	-0.281648	0.203247	-1.38574	0.165826	0.483413	TRUE	TRUE	TRUE	TRUE	constitutive	0.315682
chr12	116394388	116394888	chr12	115956583	115957083	STARR_ID3378	86.9983	-0.290635	0.196621	-1.47815	0.139368	0.446564	TRUE	FALSE	FALSE	FALSE	constitutive	0.350116
chr12	116828105	116828820	chr12	116390300	116391015	STARR_ID3382	11572.1	1.89661	0.139221	13.6231	2.92045e-42	7.73325e-40	TRUE	TRUE	TRUE	TRUE	induced	39.1116
chr12	116932918	116933565	chr12	116495113	116495760	STARR_ID3383	486.984	1.33515	0.156417	8.53586	1.39122e-17	4.61556e-16	TRUE	TRUE	FALSE	TRUE	induced	15.3358
chr12	116965697	116966197	chr12	116527892	116528392	STARR_ID3384	1496.82	-0.157325	0.136704	-1.15084	0.249798	0.586417	TRUE	TRUE	TRUE	TRUE	constitutive	0.231793
chr12	117096411	117096911	chr12	116658606	116659106	STARR_ID3385	398.551	-0.0340994	0.115482	-0.295278	0.767782	0.90694	FALSE	FALSE	FALSE	FALSE	inactive	0.0424213
chr12	117443280	117443683	chr12	117005475	117005878	STARR_ID3389	2551.14	0.988837	0.188116	5.25652	1.4681e-07	2.17764e-06	TRUE	TRUE	TRUE	TRUE	constitutive	5.66201
chr12	118291350	118291850	chr12	117853545	117854045	STARR_ID3391	756.365	0.0435947	0.100992	0.431664	0.665986	0.862565	FALSE	FALSE	FALSE	FALSE	inactive	0.0642084
chr12	118490186	118490686	chr12	118052381	118052881	STARR_ID3392	2626.25	-0.0359375	0.201201	-0.178615	0.85824	0.946315	TRUE	TRUE	TRUE	TRUE	constitutive	0.0239643
chr12	118794957	118795564	chr12	118357152	118357759	STARR_ID3394	64.0538	-0.00602816	0.22611	-0.0266603	0.978731	0.99346	FALSE	FALSE	FALSE	FALSE	inactive	0.00284944
chr12	119608855	119609542	chr12	119171050	119171737	STARR_ID3395	922.981	2.21657	0.187231	11.8387	2.4623e-32	2.66731e-30	TRUE	TRUE	TRUE	TRUE	induced	29.5739
chr12	119917061	119917561	chr12	119479256	119479756	STARR_ID3396	688.207	-0.164509	0.112258	-1.46545	0.142798	0.45184	TRUE	TRUE	TRUE	TRUE	constitutive	0.345015
chr12	120124224	120124724	chr12	119686419	119686919	STARR_ID3398	1484.03	-0.10906	0.102608	-1.06288	0.287836	0.625306	TRUE	FALSE	FALSE	FALSE	constitutive	0.203907
chr12	120148022	120149827	chr12	119710217	119712022	STARR_ID3399	2831.57	-0.0496236	0.0794835	-0.624327	0.532413	0.79602	FALSE	FALSE	FALSE	FALSE	inactive	0.099076
chr12	120154284	120154784	chr12	119716479	119716979	STARR_ID3400	729.424	-0.260252	0.13482	-1.93037	0.0535614	0.259795	TRUE	TRUE	TRUE	TRUE	constitutive	0.58537
chr12	120517157	120517694	chr12	120079353	120079890	STARR_ID3401	1215.96	-0.0266756	0.116188	-0.229591	0.81841	0.927916	TRUE	TRUE	TRUE	TRUE	constitutive	0.0324911
chr12	120669286	120669786	chr12	120231483	120231983	STARR_ID3402	1589.03	-0.0130902	0.12492	-0.104789	0.916543	0.967972	TRUE	TRUE	FALSE	FALSE	constitutive	0.0141373
chr12	120672505	120673005	chr12	120234702	120235202	STARR_ID3403	564.245	-0.0913807	0.0942443	-0.969615	0.332238	0.665081	FALSE	FALSE	FALSE	FALSE	inactive	0.177125
chr12	121124063	121125226	chr12	120686260	120687423	STARR_ID3406	15891	-0.0172107	0.151146	-0.113868	0.909343	0.965344	TRUE	TRUE	TRUE	TRUE	constitutive	0.0153178
chr12	121454140	121454617	chr12	121016337	121016814	STARR_ID3407	10278.6	-0.0397854	0.1377	-0.288929	0.772636	0.909133	TRUE	TRUE	TRUE	TRUE	constitutive	0.0413726
chr12	121665030	121665530	chr12	121227227	121227727	STARR_ID3409	1699.45	-0.106869	0.155552	-0.687031	0.492063	0.773358	TRUE	TRUE	TRUE	TRUE	constitutive	0.111619
chr12	122186395	122187298	chr12	121748489	121749392	STARR_ID3413	61242.5	2.60905	0.174874	14.9196	2.4588e-50	1.21236e-47	TRUE	TRUE	TRUE	TRUE	induced	46.9164
chr12	122192730	122193230	chr12	121754824	121755324	STARR_ID3414	758.708	-0.0980035	0.0912683	-1.0738	0.282914	0.621698	FALSE	FALSE	FALSE	FALSE	inactive	0.206421
chr12	122234920	122235420	chr12	121797014	121797514	STARR_ID3415	5692.44	0.0450766	0.111965	0.402594	0.687247	0.871437	TRUE	TRUE	FALSE	FALSE	constitutive	0.0597642
chr12	122442711	122443080	chr12	122004805	122005174	STARR_ID3418	566.154	0.861564	0.191326	4.50313	6.69595e-06	8.48807e-05	TRUE	TRUE	FALSE	TRUE	constitutive	4.07119
chr12	122515875	122516758	chr12	122077969	122078852	STARR_ID3421	3664.8	0.122728	0.156988	0.781768	0.434351	0.736955	TRUE	TRUE	FALSE	FALSE	constitutive	0.132559
chr12	122595579	122596079	chr12	122111032	122111532	STARR_ID3423	264.113	-0.0175346	0.135851	-0.129073	0.8973	0.962797	FALSE	FALSE	FALSE	FALSE	inactive	0.0164653
chr12	122948833	122949333	chr12	122464286	122464786	STARR_ID3425	3359.46	-0.314148	0.358719	-0.875751	0.381165	0.704442	TRUE	TRUE	TRUE	TRUE	constitutive	0.152154
chr12	122976893	122977237	chr12	122492346	122492690	STARR_ID3426	233.268	0.883593	0.188323	4.6919	2.70675e-06	3.56389e-05	FALSE	TRUE	FALSE	FALSE	constitutive	4.44808
chr12	122985250	122985642	chr12	122500703	122501095	STARR_ID3427	3470.76	-0.0678906	0.105323	-0.644592	0.519192	0.79029	TRUE	TRUE	TRUE	TRUE	constitutive	0.102214
chr12	123144086	123144586	chr12	122659539	122660039	STARR_ID3429	472.104	-0.219052	0.121843	-1.79782	0.0722057	0.310913	FALSE	FALSE	FALSE	FALSE	inactive	0.507362
chr12	123234437	123234937	chr12	122749890	122750390	STARR_ID3430	655.457	-0.164587	0.0913068	-1.80257	0.0714551	0.30899	FALSE	FALSE	FALSE	FALSE	inactive	0.510056
chr12	123322363	123322863	chr12	122837816	122838316	STARR_ID3431	377.208	-0.0268851	0.184001	-0.146114	0.883831	0.956055	TRUE	TRUE	FALSE	FALSE	constitutive	0.0195171
chr12	123326130	123326630	chr12	122841583	122842083	STARR_ID3432	2005.27	-0.128475	0.0997134	-1.28845	0.197591	0.528696	TRUE	TRUE	TRUE	TRUE	constitutive	0.276794
chr12	123372895	123373395	chr12	122888348	122888848	STARR_ID3433	1104.35	-0.106701	0.07718	-1.38249	0.166821	0.485423	TRUE	TRUE	FALSE	FALSE	constitutive	0.313879
chr12	123547395	123547895	chr12	123062848	123063348	STARR_ID3434	5487.37	0.20005	0.103163	1.93918	0.0524798	0.255914	TRUE	TRUE	TRUE	TRUE	constitutive	0.591906
chr12	123554269	123554769	chr12	123069722	123070222	STARR_ID3435	907.469	0.332555	0.098495	3.37636	0.000734513	0.00713505	TRUE	TRUE	FALSE	FALSE	constitutive	2.1466
chr12	123555965	123556465	chr12	123071418	123071918	STARR_ID3436	1403.28	-0.0155	0.0892315	-0.173706	0.862097	0.948824	TRUE	TRUE	FALSE	FALSE	constitutive	0.0228143
chr12	123560288	123560788	chr12	123075741	123076241	STARR_ID3437	890.84	-0.159312	0.107415	-1.48315	0.138033	0.443936	TRUE	FALSE	FALSE	FALSE	constitutive	0.35268
chr12	123867997	123868464	chr12	123383450	123383917	STARR_ID3439	1184.22	-0.0261842	0.0984029	-0.266092	0.790168	0.917614	FALSE	FALSE	FALSE	FALSE	inactive	0.0373401
chr12	123874482	123874982	chr12	123389935	123390435	STARR_ID3440	2365.7	-0.0997023	0.0950397	-1.04906	0.294151	0.631446	TRUE	TRUE	FALSE	FALSE	constitutive	0.199664
chr12	123930286	123930786	chr12	123445739	123446239	STARR_ID3441	591.461	-0.156325	0.0958836	-1.63036	0.103025	0.382216	TRUE	TRUE	TRUE	FALSE	constitutive	0.417691
chr12	124702393	124702893	chr12	124217847	124218347	STARR_ID3445	111.746	0.222554	0.217367	1.02387	0.305899	0.642581	TRUE	TRUE	FALSE	FALSE	constitutive	0.192072
chr12	124844057	124844965	chr12	124359511	124360419	STARR_ID3446	11205.2	-0.179405	0.108754	-1.64964	0.0990162	0.373791	TRUE	TRUE	FALSE	FALSE	constitutive	0.427371
chr12	124849992	124850655	chr12	124365446	124366109	STARR_ID3447	3717.07	0.0483854	0.11503	0.420632	0.674024	0.864957	FALSE	FALSE	FALSE	FALSE	inactive	0.0630057
chr12	124866313	124866813	chr12	124381767	124382267	STARR_ID3452	4515.94	-0.0688608	0.127954	-0.53817	0.59046	0.824349	TRUE	TRUE	TRUE	TRUE	constitutive	0.0838887
chr12	124872030	124872530	chr12	124387484	124387984	STARR_ID3453	1050.17	-0.0128112	0.0977198	-0.131101	0.895695	0.962033	FALSE	FALSE	FALSE	FALSE	inactive	0.0168099
chr12	124877167	124878239	chr12	124392621	124393693	STARR_ID3455	6539.9	0.121215	0.104457	1.16043	0.245874	0.581932	TRUE	TRUE	FALSE	FALSE	constitutive	0.235128
chr12	124895119	124895619	chr12	124410573	124411073	STARR_ID3456	2706.79	0.146226	0.102736	1.42332	0.154643	0.468384	FALSE	FALSE	FALSE	FALSE	inactive	0.329398
chr12	124907139	124908325	chr12	124422593	124423779	STARR_ID3457	6195.98	-0.144733	0.0991538	-1.45969	0.144377	0.454185	TRUE	TRUE	FALSE	FALSE	constitutive	0.342767
chr12	124919455	124919955	chr12	124434909	124435409	STARR_ID3458	1835.98	-0.127957	0.0882114	-1.45057	0.146899	0.458125	FALSE	FALSE	FALSE	FALSE	inactive	0.339016
chr12	125012537	125013037	chr12	124527991	124528491	STARR_ID3462	1116.65	-0.051383	0.0951192	-0.540196	0.589062	0.823773	TRUE	TRUE	FALSE	FALSE	constitutive	0.0841924
chr12	125093551	125094051	chr12	124609005	124609505	STARR_ID3463	1091.02	-0.0426534	0.141052	-0.302394	0.762352	0.904227	FALSE	FALSE	FALSE	FALSE	inactive	0.0437227
chr12	125122120	125122620	chr12	124637574	124638074	STARR_ID3464	2069.65	-0.18375	0.123916	-1.48286	0.138112	0.444089	TRUE	TRUE	TRUE	TRUE	constitutive	0.35253
chr12	125163914	125164447	chr12	124679368	124679901	STARR_ID3465	3357.09	-0.0861064	0.0725607	-1.18668	0.235353	0.570296	TRUE	FALSE	FALSE	FALSE	constitutive	0.2439
chr12	125204970	125205470	chr12	124720424	124720924	STARR_ID3467	1395.07	-0.105816	0.0911765	-1.16056	0.245819	0.581932	TRUE	TRUE	FALSE	FALSE	constitutive	0.235128
chr12	125211845	125212345	chr12	124727299	124727799	STARR_ID3468	936.768	-0.128334	0.125601	-1.02176	0.306895	0.643497	TRUE	TRUE	FALSE	FALSE	constitutive	0.191454
chr12	125215094	125215594	chr12	124730548	124731048	STARR_ID3469	541.694	-0.0119703	0.0851873	-0.140517	0.888252	0.95843	FALSE	FALSE	FALSE	FALSE	inactive	0.0184397
chr12	125226551	125227051	chr12	124742005	124742505	STARR_ID3470	2291.98	0.0105902	0.0805852	0.131416	0.895446	0.961996	TRUE	TRUE	FALSE	FALSE	constitutive	0.0168269
chr12	125230121	125232415	chr12	124745575	124747869	STARR_ID3471	7665.4	-0.034818	0.0808132	-0.430845	0.666581	0.862652	TRUE	FALSE	FALSE	FALSE	constitutive	0.0641642
chr12	125313084	125313584	chr12	124828538	124829038	STARR_ID3474	767.489	-0.105207	0.116183	-0.905533	0.365183	0.69163	TRUE	TRUE	FALSE	FALSE	constitutive	0.160126
chr12	125322720	125323220	chr12	124838174	124838674	STARR_ID3475	1200.62	0.113979	0.0629496	1.81065	0.0701957	0.306295	FALSE	TRUE	FALSE	FALSE	constitutive	0.513861
chr12	125331629	125332220	chr12	124847083	124847674	STARR_ID3476	1664.79	-0.156496	0.0808747	-1.93504	0.0529856	0.257351	TRUE	TRUE	FALSE	FALSE	constitutive	0.589474
chr12	125350305	125350805	chr12	124865759	124866259	STARR_ID3477	618.077	-0.0662774	0.0842327	-0.786837	0.431377	0.736929	FALSE	FALSE	FALSE	FALSE	inactive	0.132574
chr12	125379716	125380216	chr12	124895170	124895670	STARR_ID3478	1253.19	-0.0864174	0.0942361	-0.917032	0.359126	0.686043	FALSE	FALSE	FALSE	FALSE	inactive	0.163648
chr12	125389210	125389710	chr12	124904664	124905164	STARR_ID3479	1015.05	0.0717482	0.13601	0.52752	0.597833	0.828692	TRUE	TRUE	FALSE	TRUE	constitutive	0.0816069
chr12	125401599	125402522	chr12	124917053	124917976	STARR_ID3480	2909.07	-0.0321963	0.133682	-0.240842	0.809678	0.924358	TRUE	TRUE	TRUE	TRUE	constitutive	0.03416
chr12	125533970	125534563	chr12	125049424	125050017	STARR_ID3484	2437.19	-0.0471854	0.0859069	-0.549262	0.582826	0.821504	TRUE	TRUE	FALSE	FALSE	constitutive	0.0853902
chr12	129372064	129372391	chr12	128887519	128887846	STARR_ID3488	65.8362	-0.131185	0.268601	-0.4884	0.625266	0.84191	FALSE	FALSE	FALSE	FALSE	inactive	0.0747341
chr12	130582496	130582996	chr12	130097951	130098451	STARR_ID3491	1270.83	-0.126608	0.106313	-1.1909	0.233691	0.569065	TRUE	TRUE	TRUE	TRUE	constitutive	0.244838
chr12	130613209	130613709	chr12	130128664	130129164	STARR_ID3492	982.716	0.0947294	0.108656	0.871831	0.383301	0.70578	TRUE	TRUE	FALSE	FALSE	constitutive	0.151331
chr12	130621663	130622163	chr12	130137118	130137618	STARR_ID3493	855.468	-0.0996853	0.1422	-0.701024	0.483288	0.767411	TRUE	TRUE	FALSE	FALSE	constitutive	0.114972
chr12	131581586	131582046	chr12	131097041	131097501	STARR_ID3495	3100.15	0.506815	0.08671	5.84494	5.06763e-09	8.50493e-08	TRUE	TRUE	FALSE	TRUE	constitutive	7.07033
chr12	132356695	132357195	chr12	131872150	131872650	STARR_ID3500	3400.23	-0.118708	0.121768	-0.974872	0.329624	0.662351	TRUE	TRUE	FALSE	FALSE	constitutive	0.178912
chr12	133199007	133200045	chr12	132622421	132623459	STARR_ID3504	4181.16	0.134718	0.0857828	1.57045	0.11631	0.407269	TRUE	TRUE	FALSE	FALSE	constitutive	0.390119
chr13	20595614	20596114	chr13	20021474	20021974	STARR_ID3508	494.008	0.149433	0.113172	1.32041	0.186699	0.516183	TRUE	TRUE	FALSE	FALSE	constitutive	0.287197
chr13	22103590	22104090	chr13	21529451	21529951	STARR_ID3511	452.831	0.182867	0.109588	1.66868	0.0951811	0.36576	FALSE	FALSE	FALSE	FALSE	inactive	0.436803
chr13	24062609	24063109	chr13	23488470	23488970	STARR_ID3517	481.2	0.367249	0.145343	2.52677	0.0115117	0.0809669	TRUE	TRUE	FALSE	FALSE	constitutive	1.09169
chr13	24327543	24328043	chr13	23753404	23753904	STARR_ID3519	212.52	-0.168292	0.10466	-1.60799	0.107838	0.389684	TRUE	TRUE	TRUE	FALSE	constitutive	0.409288
chr13	24701193	24702778	chr13	24127054	24128639	STARR_ID3520	695.939	-0.121734	0.102994	-1.18195	0.237224	0.572462	TRUE	TRUE	FALSE	FALSE	constitutive	0.242253
chr13	24722909	24723440	chr13	24148770	24149301	STARR_ID3521	4872.06	0.350278	0.24339	1.43917	0.150104	0.462698	TRUE	TRUE	TRUE	TRUE	constitutive	0.334702
chr13	24881427	24881927	chr13	24307289	24307789	STARR_ID3523	914.413	-0.188514	0.110408	-1.70743	0.0877418	0.349184	TRUE	FALSE	FALSE	FALSE	constitutive	0.456945
chr13	25496856	25497276	chr13	24922718	24923138	STARR_ID3525	1945.77	-0.0614878	0.119969	-0.512532	0.608278	0.833919	TRUE	TRUE	FALSE	FALSE	constitutive	0.0788762
chr13	26193944	26194444	chr13	25619806	25620306	STARR_ID3528	1101.45	-0.1734	0.146652	-1.18239	0.23705	0.572275	TRUE	TRUE	TRUE	TRUE	constitutive	0.242395
chr13	26301396	26301896	chr13	25727258	25727758	STARR_ID3529	160.247	0.0954007	0.112753	0.846103	0.397495	0.716263	TRUE	TRUE	FALSE	FALSE	constitutive	0.144928
chr13	26456027	26456527	chr13	25881889	25882389	STARR_ID3530	389.603	-0.142537	0.117116	-1.21706	0.223582	0.558721	FALSE	FALSE	FALSE	FALSE	inactive	0.252805
chr13	26596709	26597209	chr13	26022571	26023071	STARR_ID3531	1353.81	0.869215	0.161418	5.38486	7.25029e-08	1.10524e-06	TRUE	TRUE	FALSE	TRUE	constitutive	5.95654
chr13	26827679	26828174	chr13	26253542	26254037	STARR_ID3532	2314.48	0.0170651	0.100817	0.169267	0.865587	0.950464	TRUE	TRUE	FALSE	FALSE	constitutive	0.0220642
chr13	27557178	27557576	chr13	26983041	26983439	STARR_ID3534	513.966	0.13609	0.11684	1.16476	0.244116	0.580253	TRUE	TRUE	FALSE	FALSE	constitutive	0.236383
chr13	27893509	27894009	chr13	27319372	27319872	STARR_ID3536	985.062	0.453051	0.0659773	6.86677	6.56698e-12	1.37484e-10	FALSE	TRUE	FALSE	FALSE	constitutive	9.86175
chr13	28074723	28075223	chr13	27500586	27501086	STARR_ID3537	1283.8	1.06019	0.161943	6.54671	5.88202e-11	1.11902e-09	TRUE	TRUE	TRUE	TRUE	induced	8.95116
chr13	28239934	28240434	chr13	27665797	27666297	STARR_ID3538	680.859	-0.0836145	0.109086	-0.766499	0.443379	0.742897	TRUE	TRUE	FALSE	FALSE	constitutive	0.129071
chr13	28609181	28609681	chr13	28035044	28035544	STARR_ID3539	5208.4	1.31439	0.177881	7.38915	1.47765e-13	3.44119e-12	TRUE	TRUE	TRUE	TRUE	induced	11.4633
chr13	29017137	29017637	chr13	28443000	28443500	STARR_ID3541	484.117	0.320308	0.134603	2.37965	0.0173292	0.113198	TRUE	TRUE	FALSE	FALSE	constitutive	0.946162
chr13	30414450	30414894	chr13	29840313	29840757	STARR_ID3546	8.77891	-0.393564	0.527678	-0.745841	0.455763	0.750802	FALSE	FALSE	FALSE	FALSE	inactive	0.124475
chr13	30476389	30476889	chr13	29902252	29902752	STARR_ID3547	252.952	-0.262869	0.172221	-1.52635	0.126924	0.427118	FALSE	FALSE	FALSE	FALSE	inactive	0.369452
chr13	30492784	30493284	chr13	29918647	29919147	STARR_ID3548	650.853	-0.107888	0.0868179	-1.2427	0.213979	0.547546	TRUE	TRUE	FALSE	FALSE	constitutive	0.261579
chr13	30682854	30683354	chr13	30108717	30109217	STARR_ID3549	2865.2	-0.095723	0.217317	-0.440477	0.659591	0.858267	FALSE	FALSE	FALSE	FALSE	inactive	0.0663775
chr13	31370487	31370987	chr13	30796350	30796850	STARR_ID3555	582.852	-0.123987	0.102544	-1.20911	0.22662	0.561991	TRUE	FALSE	FALSE	FALSE	constitutive	0.250271
chr13	31627178	31627678	chr13	31053041	31053541	STARR_ID3557	612.326	-0.095837	0.100451	-0.954069	0.340049	0.671683	FALSE	FALSE	FALSE	FALSE	inactive	0.172836
chr13	31648347	31648903	chr13	31074210	31074766	STARR_ID3558	582.171	-0.107835	0.0866408	-1.24463	0.213269	0.546919	FALSE	FALSE	FALSE	FALSE	inactive	0.262077
chr13	31668766	31669266	chr13	31094629	31095129	STARR_ID3559	82.2732	-0.209545	0.159524	-1.31356	0.188994	0.518843	TRUE	FALSE	FALSE	FALSE	constitutive	0.284964
chr13	31736480	31736908	chr13	31162343	31162771	STARR_ID3560	1171.51	-0.068752	0.114779	-0.598993	0.549178	0.806892	TRUE	TRUE	FALSE	FALSE	constitutive	0.0931845
chr13	32605584	32606084	chr13	32031447	32031947	STARR_ID3565	1124.06	-0.115342	0.0982332	-1.17416	0.24033	0.576199	TRUE	TRUE	FALSE	FALSE	constitutive	0.239428
chr13	32642359	32642859	chr13	32068222	32068722	STARR_ID3567	186.99	0.122985	0.129088	0.952725	0.340729	0.671782	FALSE	TRUE	FALSE	FALSE	constitutive	0.172771
chr13	32708337	32708837	chr13	32134200	32134700	STARR_ID3568	341.844	-0.0497292	0.120788	-0.411707	0.680554	0.868726	FALSE	FALSE	FALSE	FALSE	inactive	0.0611172
chr13	33558962	33559462	chr13	32984824	32985324	STARR_ID3569	1682.27	-0.296497	0.0672332	-4.40998	1.0338e-05	0.000129103	TRUE	TRUE	TRUE	TRUE	constitutive	3.88906
chr13	33693993	33694493	chr13	33119856	33120356	STARR_ID3570	850.678	-0.334064	0.11042	-3.02539	0.00248314	0.0213637	TRUE	TRUE	TRUE	TRUE	constitutive	1.67032
chr13	33700062	33700562	chr13	33125925	33126425	STARR_ID3571	737.126	0.56549	0.189821	2.97907	0.00289125	0.0243618	TRUE	TRUE	FALSE	TRUE	constitutive	1.61329
chr13	33919834	33920334	chr13	33345697	33346197	STARR_ID3572	1278.36	1.01083	0.088165	11.4652	1.97329e-30	1.80872e-28	TRUE	TRUE	TRUE	TRUE	induced	27.7426
chr13	34021153	34021653	chr13	33447016	33447516	STARR_ID3574	149.172	-0.298197	0.146232	-2.0392	0.0414298	0.21868	FALSE	FALSE	FALSE	FALSE	inactive	0.66019
chr13	34083927	34084352	chr13	33509790	33510215	STARR_ID3575	287.778	-0.336191	0.1303	-2.58012	0.00987662	0.0714705	TRUE	FALSE	FALSE	FALSE	constitutive	1.14587
chr13	34216428	34217657	chr13	33642291	33643520	STARR_ID3579	2654.97	1.18068	0.0847578	13.93	4.16131e-44	1.32228e-41	TRUE	TRUE	FALSE	TRUE	induced	40.8787
chr13	34698989	34699489	chr13	34124852	34125352	STARR_ID3582	113.991	-0.177716	0.162266	-1.09521	0.273423	0.611294	FALSE	FALSE	FALSE	FALSE	inactive	0.21375
chr13	34736378	34736878	chr13	34162241	34162741	STARR_ID3583	136.807	-0.172525	0.145014	-1.18972	0.234158	0.569619	FALSE	FALSE	FALSE	FALSE	inactive	0.244416
chr13	34850852	34851352	chr13	34276715	34277215	STARR_ID3584	130.961	-0.129225	0.156056	-0.828068	0.407632	0.722563	FALSE	FALSE	FALSE	FALSE	inactive	0.141124
chr13	34921584	34922606	chr13	34347447	34348469	STARR_ID3586	412.175	-0.0886958	0.0914718	-0.969652	0.33222	0.665081	FALSE	FALSE	FALSE	FALSE	inactive	0.177125
chr13	35322191	35323794	chr13	34748054	34749657	STARR_ID3587	905.151	-0.0655169	0.0997931	-0.656527	0.511485	0.785912	FALSE	FALSE	FALSE	FALSE	inactive	0.104626
chr13	36580680	36581180	chr13	36006543	36007043	STARR_ID3589	232.517	-0.0915143	0.151768	-0.60299	0.546515	0.805216	TRUE	FALSE	FALSE	FALSE	constitutive	0.0940874
chr13	37203694	37204387	chr13	36629557	36630250	STARR_ID3592	469.712	-0.000360871	0.103657	-0.0034814	0.997222	0.999529	FALSE	FALSE	FALSE	FALSE	inactive	0.000204593
chr13	39069426	39069742	chr13	38495289	38495605	STARR_ID3594	153.69	0.49044	0.169464	2.89407	0.00380282	0.031341	FALSE	TRUE	FALSE	FALSE	constitutive	1.50389
chr13	40690148	40690844	chr13	40116011	40116707	STARR_ID3598	2294.8	0.882642	0.20306	4.3467	1.382e-05	0.000170356	TRUE	TRUE	TRUE	TRUE	constitutive	3.76864
chr13	40705327	40705658	chr13	40131190	40131521	STARR_ID3599	353.199	-0.0378394	0.137297	-0.275602	0.782854	0.913538	TRUE	TRUE	FALSE	FALSE	constitutive	0.0392733
chr13	40910661	40911390	chr13	40336524	40337253	STARR_ID3603	612.707	-0.063423	0.0795843	-0.796929	0.425492	0.732705	FALSE	FALSE	FALSE	FALSE	inactive	0.135071
chr13	41469779	41470322	chr13	40895643	40896186	STARR_ID3607	219.72	0.0296934	0.177227	0.167544	0.866942	0.951096	FALSE	FALSE	FALSE	FALSE	inactive	0.0217757
chr13	41567983	41568268	chr13	40993847	40994132	STARR_ID3608	343.016	0.0239996	0.122872	0.195323	0.84514	0.939206	TRUE	TRUE	TRUE	TRUE	constitutive	0.0272391
chr13	41591386	41591886	chr13	41017250	41017750	STARR_ID3609	59.4878	0.14089	0.221026	0.637438	0.523839	0.792836	FALSE	FALSE	FALSE	FALSE	inactive	0.100817
chr13	41635458	41635894	chr13	41061322	41061758	STARR_ID3610	4872.84	-0.0664738	0.086654	-0.767118	0.443012	0.742803	TRUE	TRUE	TRUE	TRUE	constitutive	0.129126
chr13	41675775	41676594	chr13	41101639	41102458	STARR_ID3611	699.872	1.32124	0.135375	9.75987	1.67369e-22	7.95086e-21	FALSE	TRUE	FALSE	TRUE	induced	20.0996
chr13	41706489	41707418	chr13	41132353	41133282	STARR_ID3612	3194.85	-0.0652471	0.100483	-0.649333	0.516123	0.788382	TRUE	TRUE	FALSE	FALSE	constitutive	0.103263
chr13	41768629	41769020	chr13	41194493	41194884	STARR_ID3613	2478.27	-0.168578	0.158299	-1.06494	0.286905	0.624707	TRUE	TRUE	FALSE	FALSE	constitutive	0.204323
chr13	42082965	42083383	chr13	41508829	41509247	STARR_ID3614	729.746	0.777912	0.131443	5.91825	3.25392e-09	5.53245e-08	TRUE	TRUE	FALSE	FALSE	constitutive	7.25708
chr13	42518936	42519436	chr13	41944800	41945300	STARR_ID3617	311.639	-0.060486	0.0927459	-0.652169	0.514292	0.786826	TRUE	TRUE	FALSE	FALSE	constitutive	0.104121
chr13	43723829	43724468	chr13	43149693	43150332	STARR_ID3622	473.255	0.363522	0.100643	3.61199	0.000303857	0.0031553	TRUE	TRUE	FALSE	FALSE	constitutive	2.50096
chr13	43807090	43807590	chr13	43232954	43233454	STARR_ID3625	813.925	0.912442	0.140617	6.48885	8.64942e-11	1.61882e-09	TRUE	TRUE	FALSE	TRUE	constitutive	8.7908
chr13	44379154	44379654	chr13	43805018	43805518	STARR_ID3626	263.992	-0.175218	0.103262	-1.69683	0.0897287	0.35402	FALSE	FALSE	FALSE	FALSE	inactive	0.450972
chr13	44682514	44683014	chr13	44108378	44108878	STARR_ID3628	312.511	0.525016	0.163332	3.21441	0.00130713	0.0120507	FALSE	TRUE	FALSE	FALSE	constitutive	1.91899
chr13	44714303	44714803	chr13	44140167	44140667	STARR_ID3629	133.197	-0.371778	0.178289	-2.08526	0.0370461	0.201186	FALSE	FALSE	FALSE	FALSE	inactive	0.696403
chr13	44977368	44977868	chr13	44403232	44403732	STARR_ID3633	323.727	-0.204867	0.103676	-1.97603	0.0481512	0.241923	TRUE	TRUE	FALSE	FALSE	constitutive	0.616323
chr13	44981809	44982309	chr13	44407673	44408173	STARR_ID3634	389.36	0.00185143	0.106732	0.0173466	0.98616	0.995911	FALSE	FALSE	FALSE	FALSE	inactive	0.00177948
chr13	45333933	45334912	chr13	44759797	44760776	STARR_ID3636	773.363	-0.0406301	0.0792721	-0.51254	0.608273	0.833919	FALSE	FALSE	FALSE	FALSE	inactive	0.0788762
chr13	45427591	45429290	chr13	44853455	44855154	STARR_ID3639	1330.13	-0.0502423	0.075029	-0.669638	0.503088	0.781063	FALSE	FALSE	FALSE	FALSE	inactive	0.107314
chr13	45496362	45496862	chr13	44922227	44922727	STARR_ID3641	337.835	-0.0503077	0.103948	-0.483969	0.628408	0.843147	TRUE	FALSE	FALSE	FALSE	constitutive	0.0740969
chr13	46709228	46709775	chr13	46135093	46135640	STARR_ID3646	2358.47	-0.0494652	0.174716	-0.283118	0.777086	0.910485	TRUE	TRUE	FALSE	FALSE	constitutive	0.0407273
chr13	46863646	46864146	chr13	46289511	46290011	STARR_ID3647	134.404	0.180895	0.201186	0.899142	0.368577	0.694646	FALSE	FALSE	FALSE	FALSE	inactive	0.158236
chr13	46933657	46934418	chr13	46359522	46360283	STARR_ID3648	682.521	1.11109	0.18093	6.141	8.20034e-10	1.4405e-08	TRUE	TRUE	TRUE	TRUE	induced	7.84149
chr13	49165100	49165600	chr13	48590964	48591464	STARR_ID3652	837.283	1.28162	0.144411	8.87485	7.00279e-19	2.52861e-17	TRUE	TRUE	TRUE	TRUE	induced	16.5971
chr13	49254108	49254608	chr13	48679972	48680472	STARR_ID3653	448.553	0.218024	0.103598	2.10451	0.0353336	0.195071	FALSE	TRUE	FALSE	FALSE	constitutive	0.709806
chr13	49799700	49800200	chr13	49225564	49226064	STARR_ID3657	158.053	0.277717	0.137086	2.02585	0.0427797	0.223054	FALSE	FALSE	FALSE	FALSE	inactive	0.65159
chr13	51218503	51219003	chr13	50644367	50644867	STARR_ID3660	1427.37	-0.190211	0.113681	-1.6732	0.0942874	0.364284	TRUE	FALSE	FALSE	FALSE	constitutive	0.43856
chr13	51699687	51700187	chr13	51125551	51126051	STARR_ID3661	333.271	-0.111392	0.098758	-1.12793	0.259348	0.596952	TRUE	TRUE	FALSE	FALSE	constitutive	0.224061
chr13	52210525	52211025	chr13	51636389	51636889	STARR_ID3664	251.022	-0.0152937	0.166962	-0.0916	0.927016	0.972516	FALSE	FALSE	FALSE	FALSE	inactive	0.012103
chr13	52248412	52248912	chr13	51674276	51674776	STARR_ID3665	258.363	-0.0578616	0.187618	-0.308402	0.757777	0.902001	FALSE	FALSE	FALSE	FALSE	inactive	0.0447931
chr13	52480805	52481305	chr13	51906669	51907169	STARR_ID3666	667.664	-0.174332	0.112375	-1.55134	0.12082	0.416291	FALSE	FALSE	FALSE	FALSE	inactive	0.380603
chr13	52493639	52494139	chr13	51919503	51920003	STARR_ID3667	854.27	0.17303	0.122654	1.41072	0.158328	0.473631	TRUE	TRUE	FALSE	FALSE	constitutive	0.32456
chr13	52503834	52504334	chr13	51929698	51930198	STARR_ID3668	771.404	-0.0144492	0.0696014	-0.207599	0.835542	0.935682	FALSE	FALSE	FALSE	FALSE	inactive	0.0288715
chr13	52785506	52785780	chr13	52211371	52211645	STARR_ID3670	392.691	-0.203283	0.125164	-1.62412	0.104349	0.384362	TRUE	TRUE	FALSE	FALSE	constitutive	0.41526
chr13	53584738	53585238	chr13	53010603	53011103	STARR_ID3671	644.687	0.183234	0.127872	1.43294	0.151874	0.464424	FALSE	TRUE	FALSE	FALSE	constitutive	0.333085
chr13	54130575	54131075	chr13	53556440	53556940	STARR_ID3673	87.2569	0.416731	0.167814	2.48329	0.0130174	0.0896177	FALSE	TRUE	FALSE	FALSE	constitutive	1.04761
chr13	60324959	60325459	chr13	59750825	59751325	STARR_ID3675	346.314	-0.0656702	0.117906	-0.55697	0.577548	0.819362	FALSE	FALSE	FALSE	FALSE	inactive	0.0865239
chr13	62083014	62083514	chr13	61508881	61509381	STARR_ID3678	364.173	-0.169987	0.0893908	-1.90162	0.0572209	0.271467	TRUE	TRUE	FALSE	FALSE	constitutive	0.566283
chr13	62239433	62239933	chr13	61665300	61665800	STARR_ID3679	1151.47	-0.159297	0.113878	-1.39884	0.161862	0.478196	TRUE	TRUE	FALSE	FALSE	constitutive	0.320394
chr13	62817162	62817662	chr13	62243029	62243529	STARR_ID3680	112.709	0.19179	0.208492	0.919896	0.357627	0.684942	TRUE	TRUE	FALSE	FALSE	constitutive	0.164346
chr13	65788626	65789126	chr13	65214494	65214994	STARR_ID3681	237.956	1.34921	0.201075	6.70997	1.94669e-11	3.87145e-10	TRUE	TRUE	TRUE	TRUE	induced	9.41213
chr13	70823337	70823837	chr13	70249205	70249705	STARR_ID3683	291.818	0.0891908	0.134319	0.66402	0.506677	0.783326	TRUE	TRUE	FALSE	FALSE	constitutive	0.106058
chr13	70965745	70966245	chr13	70391613	70392113	STARR_ID3684	124.022	-0.235604	0.174955	-1.34666	0.178091	0.503365	FALSE	FALSE	FALSE	FALSE	inactive	0.298117
chr13	72287052	72287614	chr13	71712920	71713482	STARR_ID3685	86.6026	0.60952	0.195973	3.11022	0.00186947	0.0166552	FALSE	TRUE	FALSE	FALSE	constitutive	1.77845
chr13	72768682	72769182	chr13	72194544	72195044	STARR_ID3690	294.24	-0.189265	0.170029	-1.11313	0.265651	0.601903	FALSE	FALSE	FALSE	FALSE	inactive	0.220474
chr13	73534560	73535135	chr13	72960422	72960997	STARR_ID3691	403.219	-0.270781	0.181394	-1.49277	0.135496	0.440524	TRUE	TRUE	FALSE	FALSE	constitutive	0.35603
chr13	73639886	73640693	chr13	73065748	73066555	STARR_ID3692	361.57	-0.13683	0.162408	-0.842507	0.399504	0.717533	TRUE	TRUE	FALSE	FALSE	constitutive	0.144158
chr13	73707636	73708136	chr13	73133499	73133999	STARR_ID3693	237.03	0.299959	0.118987	2.52095	0.0117038	0.0820355	TRUE	TRUE	FALSE	FALSE	constitutive	1.086
chr13	74181656	74183001	chr13	73607519	73608864	STARR_ID3696	260.754	-0.22558	0.138439	-1.62946	0.103216	0.382552	FALSE	FALSE	FALSE	FALSE	inactive	0.417309
chr13	76007008	76007508	chr13	75432872	75433372	STARR_ID3697	265.458	0.201029	0.149171	1.34764	0.177775	0.502868	TRUE	TRUE	FALSE	FALSE	constitutive	0.298546
chr13	76410587	76411087	chr13	75836451	75836951	STARR_ID3698	171.657	0.169375	0.205458	0.824377	0.409725	0.723971	FALSE	FALSE	FALSE	FALSE	inactive	0.140279
chr13	77601881	77602854	chr13	77027746	77028719	STARR_ID3699	517.255	0.372266	0.160267	2.32279	0.0201906	0.127239	TRUE	TRUE	FALSE	FALSE	constitutive	0.89538
chr13	77629286	77629786	chr13	77055151	77055651	STARR_ID3700	179.822	-0.186727	0.176782	-1.05626	0.29085	0.628055	FALSE	FALSE	FALSE	FALSE	inactive	0.202003
chr13	77717595	77718095	chr13	77143460	77143960	STARR_ID3702	690.346	-0.3769	0.114184	-3.30081	0.000964049	0.00912305	TRUE	TRUE	TRUE	TRUE	constitutive	2.03986
chr13	81964156	81964699	chr13	81390021	81390564	STARR_ID3710	550.82	0.628511	0.126743	4.95892	7.08857e-07	9.83118e-06	FALSE	TRUE	FALSE	FALSE	constitutive	5.00739
chr13	82561964	82562464	chr13	81987829	81988329	STARR_ID3711	15.1097	-0.472579	0.432417	-1.09288	0.274448	0.612506	FALSE	FALSE	FALSE	FALSE	inactive	0.212889
chr13	82866477	82866846	chr13	82292342	82292711	STARR_ID3712	106.774	-0.0167136	0.1537	-0.108742	0.913407	0.966894	TRUE	TRUE	FALSE	FALSE	constitutive	0.0146212
chr13	82879743	82880243	chr13	82305608	82306108	STARR_ID3713	578.426	2.77158	0.213104	13.0058	1.13443e-38	2.19206e-36	FALSE	TRUE	FALSE	TRUE	induced	35.6591
chr13	83932545	83933045	chr13	83358410	83358910	STARR_ID3714	152.996	0.551518	0.156866	3.51585	0.000438355	0.00443284	TRUE	TRUE	FALSE	FALSE	constitutive	2.35332
chr13	84305009	84305569	chr13	83730874	83731434	STARR_ID3716	188.893	-0.221762	0.202729	-1.09388	0.274008	0.612068	TRUE	FALSE	FALSE	FALSE	constitutive	0.213201
chr13	86160561	86161061	chr13	85586426	85586926	STARR_ID3717	51.5275	-0.191973	0.23276	-0.824768	0.409503	0.723882	TRUE	TRUE	TRUE	TRUE	constitutive	0.140332
chr13	86283083	86283583	chr13	85708948	85709448	STARR_ID3718	44.1433	0.0868227	0.351448	0.247043	0.804875	0.922346	FALSE	FALSE	FALSE	FALSE	inactive	0.0351061
chr13	89600756	89601256	chr13	88948502	88949002	STARR_ID3720	123.681	-0.0874706	0.177816	-0.491917	0.622778	0.840659	FALSE	FALSE	FALSE	FALSE	inactive	0.0753802
chr13	90166785	90167368	chr13	89514531	89515114	STARR_ID3721	727.759	0.0417448	0.148895	0.280364	0.779198	0.911391	TRUE	TRUE	FALSE	FALSE	constitutive	0.0402954
chr13	94392200	94392959	chr13	93739947	93740706	STARR_ID3726	213.077	-0.240723	0.208913	-1.15227	0.249212	0.585414	TRUE	TRUE	FALSE	FALSE	constitutive	0.232537
chr13	94658562	94659062	chr13	94006308	94006808	STARR_ID3728	203.725	0.153597	0.115868	1.32562	0.184967	0.513712	FALSE	FALSE	FALSE	FALSE	inactive	0.28928
chr13	95779957	95780824	chr13	95127703	95128570	STARR_ID3729	563.818	0.0116495	0.0963374	0.120924	0.903751	0.964317	FALSE	FALSE	FALSE	FALSE	inactive	0.0157803
chr13	96187387	96187887	chr13	95535133	95535633	STARR_ID3731	4409.35	-0.113508	0.189996	-0.597424	0.550224	0.807065	TRUE	TRUE	FALSE	FALSE	constitutive	0.0930912
chr13	96891058	96891558	chr13	96238804	96239304	STARR_ID3733	443.115	-0.140727	0.157546	-0.89324	0.371728	0.697369	TRUE	TRUE	TRUE	TRUE	constitutive	0.156537
chr13	97932065	97932549	chr13	97279811	97280295	STARR_ID3735	139.825	0.353394	0.177812	1.98746	0.0468718	0.237944	FALSE	FALSE	FALSE	FALSE	inactive	0.623524
chr13	98143633	98144133	chr13	97491379	97491879	STARR_ID3737	79.1738	-0.112362	0.196598	-0.571532	0.567639	0.813865	TRUE	TRUE	FALSE	FALSE	constitutive	0.0894479
chr13	98530419	98531120	chr13	97878165	97878866	STARR_ID3738	13320.7	1.02363	0.136383	7.50555	6.11731e-14	1.48257e-12	TRUE	TRUE	TRUE	TRUE	induced	11.829
chr13	98875632	98876559	chr13	98223378	98224305	STARR_ID3740	284.401	-0.157528	0.121529	-1.29621	0.194903	0.525858	FALSE	FALSE	FALSE	FALSE	inactive	0.279132
chr13	98945409	98945909	chr13	98293155	98293655	STARR_ID3742	1147.27	0.332855	0.110081	3.02373	0.00249677	0.0214423	TRUE	TRUE	FALSE	FALSE	constitutive	1.66873
chr13	99068407	99069196	chr13	98416153	98416942	STARR_ID3744	2026.49	-0.00458324	0.166371	-0.0275483	0.978022	0.993164	TRUE	TRUE	TRUE	TRUE	constitutive	0.00297903
chr13	99072230	99072730	chr13	98419976	98420476	STARR_ID3745	684.272	-0.122897	0.0821827	-1.49542	0.134806	0.439654	TRUE	FALSE	FALSE	FALSE	constitutive	0.356889
chr13	99136931	99137431	chr13	98484677	98485177	STARR_ID3748	1235.16	0.22942	0.174912	1.31163	0.189644	0.519509	TRUE	TRUE	FALSE	TRUE	constitutive	0.284407
chr13	99302539	99303039	chr13	98650285	98650785	STARR_ID3750	1080.21	1.10415	0.135729	8.13498	4.12019e-16	1.20727e-14	TRUE	TRUE	FALSE	TRUE	induced	13.9182
chr13	99710778	99711278	chr13	99058524	99059024	STARR_ID3751	1110.88	0.160449	0.124079	1.29311	0.195972	0.526689	FALSE	FALSE	FALSE	FALSE	inactive	0.278446
chr13	99844245	99844745	chr13	99191991	99192491	STARR_ID3752	365.831	-0.140867	0.109104	-1.29112	0.196661	0.527335	FALSE	FALSE	FALSE	FALSE	inactive	0.277914
chr13	100006827	100007195	chr13	99354573	99354941	STARR_ID3753	557.362	-0.0198646	0.105781	-0.18779	0.851041	0.942568	TRUE	TRUE	FALSE	FALSE	constitutive	0.0256872
chr13	106094404	106094904	chr13	105442055	105442555	STARR_ID3764	56.6868	0.0381451	0.254835	0.149685	0.881013	0.955192	FALSE	FALSE	FALSE	FALSE	inactive	0.0199093
chr13	106559159	106559659	chr13	105906810	105907310	STARR_ID3766	291.526	0.676673	0.177157	3.81963	0.000133652	0.00146894	TRUE	TRUE	FALSE	FALSE	constitutive	2.833
chr13	109363611	109364111	chr13	108711263	108711763	STARR_ID3771	977.669	1.32129	0.127532	10.3604	3.75288e-25	2.16381e-23	TRUE	TRUE	FALSE	TRUE	induced	22.6648
chr13	109571590	109572090	chr13	108919242	108919742	STARR_ID3772	1200.13	0.375041	0.120167	3.12099	0.00180242	0.0161181	TRUE	TRUE	TRUE	TRUE	constitutive	1.79269
chr13	110161839	110162339	chr13	109509492	109509992	STARR_ID3773	634.443	1.01262	0.145236	6.97227	3.11866e-12	6.75661e-11	TRUE	TRUE	FALSE	TRUE	induced	10.1703
chr13	110228548	110229048	chr13	109576201	109576701	STARR_ID3774	392.323	-0.0336907	0.10707	-0.31466	0.75302	0.900439	FALSE	FALSE	FALSE	FALSE	inactive	0.0455459
chr13	110357159	110357712	chr13	109704812	109705365	STARR_ID3775	676.964	-0.0113659	0.0733404	-0.154974	0.876842	0.953371	FALSE	FALSE	FALSE	FALSE	inactive	0.0207383
chr13	110396020	110396520	chr13	109743673	109744173	STARR_ID3776	530.702	0.32089	0.139786	2.29557	0.0217003	0.134851	FALSE	TRUE	FALSE	FALSE	constitutive	0.870146
chr13	111179709	111180209	chr13	110527362	110527862	STARR_ID3780	1936.09	-0.015095	0.153659	-0.0982366	0.921744	0.970189	TRUE	TRUE	FALSE	FALSE	constitutive	0.0131435
chr13	111199145	111199722	chr13	110546798	110547375	STARR_ID3781	3499.22	-0.144912	0.147255	-0.984091	0.325071	0.659881	TRUE	TRUE	TRUE	TRUE	constitutive	0.180534
chr13	111219695	111220195	chr13	110567348	110567848	STARR_ID3782	777.774	0.0540019	0.0778912	0.693299	0.488122	0.770968	TRUE	TRUE	FALSE	FALSE	constitutive	0.112964
chr13	111227779	111228060	chr13	110575432	110575713	STARR_ID3783	609.084	-0.123293	0.109025	-1.13087	0.258108	0.595943	TRUE	TRUE	FALSE	FALSE	constitutive	0.224795
chr13	111462233	111462733	chr13	110809886	110810386	STARR_ID3787	69.2917	-0.138657	0.250989	-0.552442	0.580645	0.820663	FALSE	FALSE	FALSE	FALSE	inactive	0.085835
chr13	111505531	111505986	chr13	110853184	110853639	STARR_ID3788	993.686	0.347213	0.108652	3.19564	0.00139522	0.0127968	FALSE	TRUE	FALSE	FALSE	constitutive	1.8929
chr13	111892643	111893143	chr13	111240296	111240796	STARR_ID3789	268.227	0.61671	0.153165	4.02644	5.66281e-05	0.000650382	FALSE	TRUE	FALSE	FALSE	constitutive	3.18683
[truncated: 5,578 more rows]
