# Supplementary material for: Comprehensive functional annotation of ESR1-driven enhancers in breast cancer reveals hierarchical activity independent of genomic and epigenomic contexts
Source: HighWire-hosted journal article supplement (doi:10.1101/gr.280320.124), 2025-06-10
Supplement: Supplemental_Table_S2.xlsx [file Supplemental_Table_S2.xlsx]

## Sheet: Supplemental Table S2
Supplemental Table 2 | List of ERBS regions that overlap with ESR1 peaks associated with good and poor outcome
GOOD OUTCOME
Induced ERBS			Constitutive ERBS			Inactive ERBS
chr1	215598388	215598888	chr1	182098175	182098638	chr1	183250546	183251322
chr1	229517609	229518112	chr1	203488572	203489084	chr1	20860040	20860539
chr1	48386632	48387132	chr1	49147034	49147534	chr10	12914930	12915430
chr10	120384962	120385517	chr1	96155284	96155784	chr10	80737384	80738153
chr11	113055203	113055725	chr1	9385801	9386301	chr11	6336901	6337401
chr11	133085355	133085855	chr10	6195183	6197148	chr11	57312115	57312615
chr14	100056750	100057374	chr10	6195183	6197148	chr19	28620892	28621392
chr14	106090897	106091397	chr10	125396353	125396853	chr4	61932992	61933431
chr14	106134651	106135151	chr11	69356442	69356942	chr5	16628406	16628898
chr14	106207895	106208395	chr12	130582496	130582996	chr6	120819081	120819511
chr14	106235656	106236156	chr12	130613209	130613709
chr16	2379552	2380116	chr12	130621663	130622163
chr18	20837671	20838171	chr14	101947272	101947772
chr18	49017969	49018469	chr17	48189887	48190387
chr2	1696300	1696800	chr18	10893169	10893669
chr2	175525672	175526172	chr18	20451463	20452145
chr20	3049545	3050321	chr19	11531053	11531553
chr20	4117085	4117635	chr19	28618864	28619235
chr22	35262670	35263170	chr19	35762317	35762817
chr4	150780242	150780742	chr20	61044902	61045666
chr4	190791565	190792065	chr21	21879583	21880083
chr6	64200916	64201416	chr3	195782704	195783004
chr6	169624412	169625902	chr3	41779689	41780189
chr8	13014372	13014872	chr4	84572548	84573090
chr8	98361180	98361579	chr5	156938718	156939218
chr9	35193729	35194265	chr6	6825336	6825836
			chr7	90994284	90994695
			chr8	11647112	11647865
			chr9	75172291	75172765
			chr9	116982406	116982906
			chr9	137830079	137830579
			chr9	137852349	137852849
			chrX	52089944	52090444
POOR OUTCOME
Induced ERBS			Constitutive ERBS			Inactive ERBS
chr10	30831116	30831616	chr1	220508947	220509447	chr1	184807734	184808234
chr10	104470429	104470929	chr1	226667093	226667593	chr1	215655367	215655867
chr14	87516311	87516811	chr1	235096471	235096971	chr1	232300057	232300557
chr14	96082925	96083425	chr1	235459283	235459783	chr1	19680922	19681582
chr17	63329621	63330180	chr1	31944297	31944797	chr1	22231165	22231665
chr19	31189380	31189880	chr1	59085911	59086411	chr1	22582197	22582697
chr2	35522404	35524062	chr1	100895853	100896353	chr1	25827389	25827889
chr2	156046841	156047131	chr1	112519271	112519771	chr1	27468029	27468529
chr22	30932305	30932819	chr1	113137147	113137449	chr1	29554101	29554601
chr3	16458741	16459340	chr1	116495219	116495719	chr1	34125968	34126468
chr5	52772810	52773310	chr1	156718324	156718824	chr1	40496261	40496761
chr7	20260456	20260956	chr10	5508356	5508856	chr1	79756746	79757246
chr7	34109118	34109618	chr10	29228588	29229088	chr1	100431344	100431844
chr7	88355108	88355421	chr10	33299081	33299581	chr1	108281346	108282590
			chr10	70973404	70973904	chr1	145744001	145744501
			chr10	98623735	98624235	chr1	160284981	160285928
			chr10	100122880	100123380	chr1	162177031	162177531
			chr10	119024239	119024739	chr10	27276791	27277291
			chr10	133487283	133487783	chr10	29413787	29414287
			chr11	7621487	7621987	chr10	73349733	73350233
			chr11	9105515	9106015	chr10	93882653	93883285
			chr11	15640125	15640625	chr10	123349366	123350045
			chr11	28364740	28365054	chr10	126381981	126382481
			chr11	34592133	34592633	chr11	12849437	12851202
			chr11	34661638	34662138	chr11	17259903	17261328
			chr11	35411325	35413086	chr11	18084658	18085158
			chr11	44165468	44165972	chr11	19629103	19629603
			chr11	60138240	60138740	chr11	34686819	34687319
			chr11	63326094	63326594	chr11	34689674	34690174
			chr11	65188562	65190194	chr11	35119520	35119788
			chr11	69894803	69895303	chr11	35575286	35575949
			chr11	69952031	69954864	chr11	63639541	63640041
			chr11	70015733	70016233	chr11	66516471	66516971
			chr11	70994936	70995436	chr11	69962696	69963196
			chr11	71192400	71192797	chr11	78022892	78023392
			chr11	77867018	77867953	chr12	26569485	26569985
			chr11	82715222	82715722	chr12	31612858	31613426
			chr11	88442637	88443137	chr12	73777535	73778035
			chr11	100563115	100563615	chr12	75629863	75630363
			chr12	13036309	13036809	chr12	93767981	93768481
			chr12	45990020	45990520	chr14	32777172	32777672
			chr12	49260695	49261195	chr14	38119697	38120197
			chr12	51824103	51824603	chr14	49945977	49946477
			chr12	52510026	52510526	chr14	61951870	61952370
			chr12	52541004	52542951	chr14	62025937	62027435
			chr12	67877535	67878035	chr14	62025937	62027435
			chr12	93935638	93936138	chr14	64014399	64014952
			chr12	95492099	95492599	chr14	65427616	65428116
			chr12	123930286	123930786	chr14	68643510	68644921
			chr14	31559789	31560289	chr14	69031772	69033247
			chr14	35801326	35801826	chr14	69998109	69999932
			chr14	62020582	62020933	chr14	78165524	78166174
			chr14	67999543	68000887	chr14	82002727	82003259
			chr14	95707597	95708097	chr15	27656027	27656527
			chr15	41257960	41258848	chr15	39888224	39888919
			chr15	47856021	47856521	chr15	39913322	39913825
			chr15	52948501	52949001	chr15	40701605	40702105
			chr15	61462863	61463954	chr15	42562698	42563743
			chr15	69843740	69844240	chr15	58759079	58760253
			chr15	81035558	81036058	chr15	69896277	69896777
			chr15	81041874	81042374	chr15	71363552	71364052
			chr15	83879297	83879797	chr15	88006003	88006503
			chr16	1652099	1652599	chr15	93187598	93188961
			chr16	46936205	46936705	chr15	96437448	96439426
			chr16	80871597	80872097	chr16	47020819	47021319
			chr16	82186174	82186674	chr16	71627620	71628180
			chr16	85418352	85418852	chr17	9574553	9575266
			chr17	26662216	26663127	chr17	17595184	17595684
			chr17	27073600	27074100	chr17	26961181	26961681
			chr17	37831191	37831691	chr17	38774106	38775722
			chr17	48769018	48770969	chr17	55911418	55913141
			chr17	48981746	48982293	chr17	56004594	56005094
			chr17	50496480	50496980	chr17	60877869	60878369
			chr17	55483860	55485594	chr17	61830012	61830512
			chr17	57914799	57915299	chr18	21795607	21796107
			chr17	65634014	65634514	chr19	11840372	11840872
			chr17	66292859	66293645	chr2	31094907	31095407
			chr17	70147565	70148187	chr2	120435348	120435848
			chr17	70513896	70515607	chr2	134089094	134089594
			chr17	80850746	80851246	chr2	232087673	232088173
			chr18	30192542	30193042	chr20	30296377	30296877
			chr19	290003	290503	chr20	31419675	31420175
			chr19	4914746	4915385	chr20	47280237	47280737
			chr19	18140586	18141086	chr20	49067304	49068449
			chr19	18806757	18807257	chr20	49379347	49381073
			chr19	19488545	19489045	chr22	23534357	23534857
			chr19	24005555	24007248	chr22	29773922	29774495
			chr19	38548750	38549250	chr22	36847675	36848175
			chr19	39149180	39149680	chr22	43351210	43351710
			chr19	45574375	45574875	chr22	45151650	45152150
			chr2	9970496	9970996	chr3	27356381	27356907
			chr2	15067095	15067595	chr3	30679921	30680421
			chr2	20313645	20314145	chr3	65910695	65911756
			chr2	21293175	21293675	chr3	101814054	101814554
			chr2	26235337	26235837	chr3	139926340	139926840
			chr2	118715375	118715875	chr3	148452056	148452556
			chr2	158077962	158078462	chr3	160759219	160760416
			chr2	216081450	216082044	chr4	6994944	6995444
			chr2	216844254	216844731	chr4	10175922	10176422
			chr2	221484290	221484790	chr4	26398360	26398764
			chr2	223661107	223661607	chr4	41079648	41080148
			chr2	241837571	241838071	chr4	89241885	89242385
			chr20	16741025	16741525	chr4	106915200	106915700
			chr20	17585837	17586337	chr4	129481988	129482488
			chr20	17702567	17703067	chr4	158284445	158284945
			chr20	17876799	17877266	chr4	175849335	175849835
			chr20	17909114	17909614	chr4	185208829	185209434
			chr20	24997833	24999360	chr5	13935601	13936101
			chr20	30267686	30268411	chr5	14529004	14529504
			chr20	30628498	30628998	chr5	17206073	17206573
			chr20	31961655	31962155	chr5	58839589	58840089
			chr20	39043668	39044477	chr5	105352905	105353405
			chr20	48200224	48200724	chr5	170176763	170177512
			chr20	50361052	50361552	chr5	176450346	176450846
			chr20	52278249	52278749	chr6	20217716	20218713
			chr20	52701510	52702010	chr6	42043071	42043571
			chr21	15678417	15678917	chr6	42104879	42105379
			chr21	16143794	16144294	chr6	47427801	47428618
			chr21	16505076	16505576	chr6	77126480	77127163
			chr21	33712039	33712539	chr6	145511035	145511535
			chr21	36236297	36236797	chr6	168597054	168597554
			chr22	27179850	27180350	chr7	16920124	16920624
			chr22	29213992	29216076	chr7	17134550	17135050
			chr22	30195003	30195503	chr7	20998830	20999330
			chr22	31975850	31976350	chr7	26403459	26403819
			chr22	33121201	33121888	chr7	29522910	29523410
			chr22	34247927	34248427	chr7	74049887	74050387
			chr22	43391193	43391700	chr7	75929455	75929955
			chr3	177888441	177888881	chr7	137663823	137664323
			chr3	183009299	183009914	chr7	156724582	156725082
			chr3	183729048	183729548	chr8	29140382	29141175
			chr3	193987264	193989137	chr8	29609841	29610341
			chr3	72367748	72368248	chr8	37891980	37892480
			chr3	103532794	103533294	chr8	61939469	61939811
			chr4	31993546	31994046	chr8	73086243	73086743
			chr4	38622731	38623231	chr8	74007539	74008039
			chr4	40193111	40193513	chr8	74543697	74544197
			chr4	99494964	99495464	chr8	96205273	96205762
			chr4	106554327	106554827	chr8	101484225	101484725
			chr4	106912097	106912597	chr8	117010372	117011125
			chr4	139818998	139819498	chr8	117098189	117098689
			chr4	141581157	141581657	chr8	117185847	117186347
			chr5	34511205	34511546	chr8	117573589	117574089
			chr5	35306680	35307210	chr8	119100654	119101154
			chr5	44539113	44539613	chr8	124576011	124576781
			chr5	148926455	148926955	chr8	135755958	135756458
			chr5	154224353	154224853	chr8	140770467	140771066
			chr6	3612749	3613236	chr8	140920771	140921385
			chr6	12331942	12332442	chr8	141202422	141202922
			chr6	20202950	20203450	chr9	35669215	35669715
			chr6	23692451	23692792	chr9	38023022	38023522
			chr6	35133538	35134038	chr9	95963983	95965006
			chr6	41504745	41505245	chr9	110581999	110582499
			chr6	55623267	55623788	chr9	110856217	110856717
			chr6	81237250	81238188	chr9	111240627	111241598
			chr6	135532237	135534005	chr9	123748002	123748502
			chr7	8036148	8036648	chr9	128263144	128263671
			chr7	16887031	16887531	chrX	16635413	16635913
			chr7	16944856	16945356	chrX	100705048	100705548
			chr7	17029475	17029975
			chr7	29489380	29489880
			chr7	73155704	73158397
			chr7	73245120	73247415
			chr7	139650813	139651313
			chr7	141362974	141363474
			chr7	142945968	142946468
			chr7	157916358	157916772
			chr8	18238185	18238685
			chr8	29412893	29413393
			chr8	29595915	29596415
			chr8	37743177	37744218
			chr8	37921620	37921972
			chr8	38650344	38651071
			chr8	40032247	40032747
			chr8	58767785	58768285
			chr8	87630802	87631416
			chr8	94080472	94080972
			chr8	96124872	96125372
			chr8	103628972	103629472
			chr8	119633041	119633541
			chr8	120994929	120995429
			chr8	123312397	123312897
			chr8	133689074	133689574
			chr8	134632317	134634670
			chr8	134818900	134819400
			chr8	144136958	144137655
			chr9	14251136	14251951
			chr9	33229392	33229892
			chr9	37799722	37800191
			chr9	82104446	82104946
			chr9	85656607	85657107
			chr9	97393039	97393539
			chr9	97545377	97545877
			chr9	110303765	110304265
			chr9	110893225	110894758
			chr9	111313522	111315419
			chr9	117566705	117567233
			chr9	136728302	136728802
			chrX	27814409	27814909
			chrX	153386636	153387273
