# Supplementary material for: Comprehensive functional annotation of ESR1-driven enhancers in breast cancer reveals hierarchical activity independent of genomic and epigenomic contexts
Source: HighWire-hosted journal article supplement (doi:10.1101/gr.280320.124), 2025-06-10
Supplement: Supplemental_Table_S3.xlsx [file Supplemental_Table_S3.xlsx]

## Sheet: Supplemental Table S3
Supplemental Table 3 | Accession number of studies used to build chromHMM chromatin-state model under E2 conditions in Figure 3D
Histone mark	Accession number
H3K27ac	GSE120756
H3K27ac	GSE40129
H3K27ac	GSE45822
H3K27ac	GSE62222
H3K27ac	GSE78913
H3K27me3	GSE23701
H3K36me3	GSE37323
H3K4me1	GSE23701
H3K4me3	GSE23701
H3K9ac	GSE23701
H3K9me3	GSE23701
