# Supplementary material for: Comprehensive functional annotation of ESR1-driven enhancers in breast cancer reveals hierarchical activity independent of genomic and epigenomic contexts
Source: HighWire-hosted journal article supplement (doi:10.1101/gr.280320.124), 2025-06-10
Supplement: Supplemental_Table_S4.xlsx [file Supplemental_Table_S4.xlsx]

## Sheet: Supplemental Table S4
Supplemental Table 4 | List of histone mark ChIP-seq datastreams obtained from Cistrome DB.
Accession number	Factor	Condition	% overlap with induced ERBS	% overlap with not-induced ERBS	% overlap with inactive ERBS
ENCSR493NBY	H3K4me1		28.4483	43.9655	40.2837
ENCSR752UOD	H3K27ac		38.1034	70.067	50.2837
ENCSR761DLU	H3K27me3		0	0.0239464	0.035461
ENCSR985MIB	H3K4me3		7.93103	24.9521	10.3191
GSE120756	H3K27ac	vehicle	12.931	28.137	11.1348
GSE120756	H3K27ac	E2	31.0345	27.8496	11.0284
GSE120756	H3K27ac		15	50.7184	31.3475
GSE120756	H3K4me3	vehicle	4.82759	13.6494	3.08511
GSE120756	H3K4me3	E2	5.17241	14.6791	3.82979
GSE120756	H3K4me3		5.51724	15.3496	4.25532
GSE23701	H3K14ac	vehicle	0.172414	1.81992	0.638298
GSE23701	H3K14ac	E2	3.10345	5.84291	1.48936
GSE23701	H3K27me3	vehicle	0	0.0239464	0.035461
GSE23701	H3K27me3	E2	0	0.0718391	0.070922
GSE23701	H3K4me1	vehicle	25.3448	29.1188	23.2624
GSE23701	H3K4me1	E2	7.58621	12.5	4.11348
GSE23701	H3K4me3	vehicle	6.2069	15.4693	4.75177
GSE23701	H3K4me3	E2	13.6207	28.4004	13.9362
GSE23701	H3K9ac	vehicle	3.27586	12.5718	3.97163
GSE23701	H3K9ac	E2	8.10345	17.4569	6.17021
GSE23701	H3K9me3	vehicle	0.172414	0.0718391	0.070922
GSE23701	H3K9me3	E2	0.172414	0.0718391	0
GSE24166	H3K4me2	vehicle	2.06897	1.91571	1.63121
GSE24166	H3K4me2	E2	2.75862	2.01149	2.34043
GSE31151	H3K4me2	vehicle	7.75862	20.2586	13.617
GSE31151	H3K4me2	E2	3.27586	8.47701	5.78014
GSE31755	H3K27me3B		0	0.0478927	0.070922
GSE31755	H3K36me3B		0	0.215517	0.319149
GSE31755	H3K9me3		1.2069	0.478927	0.35461
GSE33216	H3K4me2	vehicle	39.4828	54.2864	49.0071
GSE33216	H3K4me2	E2	48.1034	64.751	58.6525
GSE35954	H2AZac		3.96552	18.75	10.4965
GSE35954	H3K122ac		3.44828	16.4033	6.77305
GSE35954	H3K27ac		11.0345	20.091	9.64539
GSE37323	H3K36me3	vehicle	0.862069	0.550766	0.460993
GSE37323	H3K36me3	E2	0.344828	0.574713	0.70922
GSE38447	H3K27me3		0	0	0.035461
GSE38447	H3K9me3		1.2069	0.478927	0.35461
GSE40129	H3K27ac	E2	61.3793	75.431	52.8369
GSE40129	H3K27ac	vehicle	33.4483	68.9416	48.8652
GSE45822	H3K27ac	E2	29.6552	43.8937	26.7376
GSE45822	H3K27ac	vehicle	25	39.1284	24.3617
GSE54693	H3K4me3		8.62069	27.3228	11.8794
GSE57436	H3K27ac	E2	10.5172	15.5412	5.88652
GSE57436	H3K27ac	vehicle	4.48276	14.6552	5.8156
GSE57436	H3K4me1	E2	0.517241	1.2931	1.09929
GSE57436	H3K4me1	vehicle	4.65517	9.12356	8.65248
GSE57436	H3K4me3	E2	3.10345	10.9674	2.30496
GSE57436	H3K4me3	vehicle	3.27586	10.3209	2.30496
GSE57498	H3K27ac		27.7586	46.7912	23.9362
GSE57498	H3K4me3		5.51724	14.9186	7.05674
GSE62222	H3K27ac	E2	24.1379	24.545	7.80142
GSE62222	H3K27ac	vehicle	2.24138	9.41092	2.2695
GSE65886	H4K12ac	E2	0.344828	1.36494	0.177305
GSE65886	H4K12ac	vehicle	0.172414	1.00575	0.106383
GSE69112	H3K27ac		18.4483	32.4713	13.3333
GSE69377	H3K4ac		8.96552	14.7031	3.12057
GSE69377	H3K4me3		0.862069	5.8908	0.921986
GSE78913	H3K27ac	E2	31.5517	41.6188	17.1277
GSE78913	H3K27ac	vehicle	15.3448	40.7088	17.9787
GSE85158	H2BK120UB		0	0.0478927	0
GSE85158	H3K23ac		4.31034	9.88985	2.02128
GSE85158	H3K27ac		10.5172	30.6992	10.1773
GSE85158	H3K27me2		1.55172	4.64559	1.20567
GSE85158	H3K4me1		24.4828	44.5881	26.0638
GSE85158	H3K4me3		7.24138	21.7193	7.34043
GSE85158	H3K9ac		3.96552	13.3142	2.37589
GSE85158	H4K8ac		4.13793	13.8649	2.41135
GSE94804	H3K27ac		4.13793	13.7931	4.71631
GSE95898	H3K9ac		2.24138	12.5239	2.94326
GSE96141	H3K9me2		0	0.0239464	0
GSE96283	H4K20me1		1.37931	3.08908	3.04965
GSE96439	H3K4me2		21.7241	47.8448	31.2411
