# Supplementary material for: Comprehensive functional annotation of ESR1-driven enhancers in breast cancer reveals hierarchical activity independent of genomic and epigenomic contexts
Source: HighWire-hosted journal article supplement (doi:10.1101/gr.280320.124), 2025-06-10
Supplement: Supplemental_Table_S5.xlsx [file Supplemental_Table_S5.xlsx]

## Sheet: Supplemental Table S5
Supplemental Table 5 | Accession number of studies used to average the ChIP-seq signal of H3K4me1, H3K4me2, H3K4me3 and H3K27ac in Figure 3F.
Histone mark	Experimental condition	Accession number
H3K27ac	Full-medium	ENCSR752UOD
		GSE120756
		GSE38548
		GSE57498
		GSE78113
		GSE85158
	E2	GSE120756
		GSE40129
		GSE45822
		GSE57436
		GSE78913
	Vehicle	GSE120756
		GSE40129
		GSE45822
		GSE57436
		GSE78913
H3K4me1	Full-medium	GSE120756
		ENCSR493NBY
		GSE57498
		GSE78113
		GSE81714
		GSE85158
	E2	GSE120756
		GSE40129
		GSE45822
		GSE57436
	Vehicle	GSE120756
		GSE40129
		GSE57436
H3K4me2	Full-medium	ENCSR875KOJ
		GSE46073
	E2	GSE31151
		GSE33216
	Vehicle	GSE31151
		GSE33216
H3K4me3	Full-medium	ENCSR985MIB
		GSE120756
		GSE18046
		GSE54693
		GSE57498
		GSE81714
		GSE85158
		GSE85315
	E2	GSE120756
		GSE23701
		GSE57436
		GSE94023
	Vehicle	GSE120756
		GSE23701
		GSE57436
		GSE94023
