# Supplementary material for: Comprehensive functional annotation of ESR1-driven enhancers in breast cancer reveals hierarchical activity independent of genomic and epigenomic contexts
Source: HighWire-hosted journal article supplement (doi:10.1101/gr.280320.124), 2025-06-10
Supplement: Supplemental_Table_S6.xlsx [file Supplemental_Table_S6.xlsx]

## Sheet: Supplemental Table S6
Supplemental Table 6 | List of the 280 ChIP-seq datastreams obtained from ReMap2022.
List of the 280 ChIP-seq datastreams obtained from REMAP2022 (https://remap2022.univ-amu.fr). Χ2 test statistics and residuals for each co-regulator is given
Clusters identified in Figure 4E are given in the column 'Clusters'. Cluster underlined in red in Figure 4E is refered as cluster 4 here
Accession number	Factor	Condition	Xsquared	P_Value	Residuals induced	Residuals not-induced	Residuals inactive	% overlap with induced ERBS	% overlap with not-induced ERBS	% overlap with inactive ERBS	Clusters induced ERBS (Figure 4E)
ENCSR000AHD	CTCF		5.51411	0.0634783	-0.87508	1.50951	-1.44006	6.2069	7.80651	6.4539	1
ENCSR000AHF	TAF1		118.065	2.30433e-26	-2.82702	7.15772	-7.42816	1.03448	5.05268	0.638298	1
ENCSR000BSP	REST		106.041	9.40843e-24	1.703	5.57059	-7.55119	16.8966	17.4808	8.86525	1
ENCSR000BSR	CEBPB		70.784	4.26034e-16	-1.39592	4.05108	-4.2967	43.9655	52.3228	42.3759	2
ENCSR000BSS	ELF1		436.309	1.80554e-95	-4.24628	10.6528	-11.0377	30.5172	52.6102	28.4752	1
ENCSR000BSU	JUND		405.424	9.18831e-89	-1.20966	10.7118	-12.4866	30	42.3851	19.3972	2
ENCSR000BTP	HDAC2		202.075	1.31814e-44	-2.91742	5.55698	-5.43922	56.0345	72.8448	57.5532	3
ENCSR000BTQ	RAD21		99.694	2.2476e-22	-1.68884	5.47971	-5.90236	28.1034	36.8774	25.7801	1
ENCSR000BTR	EP300		294.505	1.11941e-64	6.02829	4.9099	-8.70878	72.069	59.2912	41.7021	3
ENCSR000BUI	FOSL2		380.867	1.97592e-83	0.87316	9.82277	-12.3493	36.5517	43.3429	20.7801	2
ENCSR000BUJ	FOXM1		292.132	3.66816e-64	7.04368	5.64435	-10.063	55.3448	42.7921	25.8511	3
ENCSR000BUK	GABPA		388.577	4.18341e-85	0.195478	10.6743	-13.0783	27.069	35.1772	13.9362	1
ENCSR000BUL	MAX		377.983	8.35806e-83	-3.73536	8.00359	-8.04555	50	72.0067	50.2837	2
ENCSR000BUM	SIN3A		166.882	5.78265e-37	-1.58666	4.76287	-5.07638	63.9655	75.5987	61.4894	3
ENCSR000BUN	TCF12		185.485	5.27844e-41	3.27413	5.77219	-8.50905	45.5172	42.6724	27.4468	2
ENCSR000BUO	TEAD4		136.705	2.06525e-30	3.6021	4.98256	-7.69688	37.069	33.1657	21.2057	2
ENCSR000BUX	EGR1		159.218	2.66793e-35	-2.59809	7.94759	-8.49317	7.24138	14.8228	5.53191	1
ENCSR000BUY	NR2F2		67.2168	2.53542e-15	0.254132	2.48919	-3.14436	76.8966	79.3343	70.8156	3
ENCSR000BUZ	PML		203.674	5.92679e-45	1.64775	8.06589	-10.5627	14.3103	16.2596	5.07092	1
ENCSR000BVA	SRF		236.618	4.15949e-52	-2.43452	9.3611	-10.2875	11.7241	21.4799	8.04965	1
ENCSR000DMP	MYC		188.734	1.0398e-41	2.90315	7.31406	-10.2171	16.0345	15.7807	5.24823	1
ENCSR000DMQ	MYC		392.05	7.36871e-86	-2.99892	9.33135	-9.99529	41.2069	60.2251	36.7021	2
ENCSR000DMR	CTCF		35.9254	1.58091e-08	-2.23021	3.69879	-3.48964	10.6897	16.3314	11.7021	1
ENCSR000DMS	CTCF		12.0576	0.00240836	-0.989416	2.22585	-2.25993	7.24138	9.43487	7.19858	1
ENCSR000DWH	CTCF		16.7845	0.000226622	-2.39451	2.41093	-1.84793	7.58621	12.0929	9.71631	1
ENCSR000EWS	GATA3		50.0059	1.3847e-11	3.32791	2.06601	-4.02338	45.3448	38.8889	32.3404	2
ENCSR000EWT	TCF7L2		50.9875	8.47636e-12	-3.05767	4.12554	-3.63369	16.3793	25.4071	19.1489	1
ENCSR000EWU	ZNF217		92.0865	1.00847e-20	2.08954	4.39075	-6.29075	36.2069	35.1533	24.7163	2
ENCSR000EWV	GATA3		3.11516	0.210646	1.33535	0.279247	-0.945416	13.4483	11.7098	10.9574	1
ENCSR000EWX	E2F1		250.997	3.13784e-55	0.245237	7.77644	-9.57438	40	46.9109	28.0496	1
ENCSR006WUS	NEUROD1		241.272	4.05967e-53	3.70703	7.59759	-10.9267	27.931	26.2692	11.4894	2
ENCSR017CEO	CUX1		66.4346	3.74898e-15	-0.0365313	4.47182	-5.4252	25.5172	29.0948	20.4255	1
ENCSR018MQH	ZNF579		231.041	6.76281e-51	-3.15663	8.66898	-9.11773	20.3448	34.1715	18.227	1
ENCSR028NUR	ZNF592		19.5197	5.77224e-05	2.6384	1.59695	-3.13989	1.72414	0.981801	0.248227	1
ENCSR038XIA	ZNF444		248.481	1.1044e-54	-2.86367	8.97315	-9.62074	20.8621	34.2672	17.6241	1
ENCSR042GSX	SPDEF		214.101	3.22491e-47	-2.88334	5.95059	-5.93365	53.6207	70.4502	54.2553	3
ENCSR042TWZ	SNIP1		33.9117	4.32685e-08	-0.928375	3.81269	-4.21865	1.55172	2.96935	0.957447	1
ENCSR062HDL	HSF1		7.23717	0.0268206	-0.858497	1.79244	-1.79189	0.689655	1.341	0.70922	1
ENCSR066TET	RFX1		146.763	1.35153e-32	-2.44189	7.10718	-7.54131	17.931	28.0172	15.9929	1
ENCSR094ZCF	CEBPG		23.1926	9.19992e-06	-1.621	3.13917	-3.08492	3.62069	6.25	3.82979	1
ENCSR096KWU	ZNF207		29.0258	4.97871e-07	0.895105	3.10392	-4.18311	4.48276	4.69349	2.23404	1
ENCSR109ODF	HES1		29.503	3.92194e-07	1.50386	2.90972	-4.22286	4.31034	3.99904	1.77305	1
ENCSR125ZYC	KLF9		161.663	7.86005e-36	-3.43888	8.17687	-8.39088	3.7931	11.3027	3.36879	1
ENCSR126YEB	FOXA1		16.3627	0.000279823	-1.89778	1.77951	-1.30482	42.7586	50.1437	46.5248	2
ENCSR135ANT	NRF1		107.324	4.95285e-24	-2.08446	6.75292	-7.27231	2.41379	6.32184	1.38298	1
ENCSR155VDK	ZBTB11		107.389	4.79567e-24	-4.3617	6.75105	-6.23728	0.172414	5.60345	1.38298	1
ENCSR176EXN	JUN		173.368	2.25715e-38	-0.283693	8.14395	-9.78173	6.2069	9.72222	1.80851	1
ENCSR197DJH	SREBF1		101.874	7.55536e-23	3.14341	5.0698	-7.59503	12.2414	10.728	4.29078	1
ENCSR200CUA	HDGF		17.2715	0.000177641	-2.08663	2.68081	-2.31596	0.862069	2.72989	1.48936	1
ENCSR231ENE	ARID3A		2.71671	0.257084	0.0994453	1.01971	-1.28598	0.517241	0.598659	0.319149	1
ENCSR231YFE	ZBTB33		31.9988	1.12605e-07	0.794891	3.32895	-4.4115	3.10345	3.40038	1.24113	1
ENCSR234VCE	DPF2		237.836	2.2619e-52	-1.11848	6.78866	-7.75389	51.3793	62.5958	44.0071	3
ENCSR277BXW	ZBTB7B		204.229	4.49032e-45	-1.53602	8.81811	-10.0342	9.31034	16.092	5.07092	1
ENCSR288IJC	MAZ		449.87	2.05057e-98	-4.06062	12.4853	-13.3519	14.1379	31.1303	10.2482	1
ENCSR309ELI	ZBTB1		8.45474	0.0145907	1.38169	1.29469	-2.20213	0.517241	0.335249	0.035461	1
ENCSR318LVG	ZBTB40		71.0176	3.79077e-16	-2.48115	5.40567	-5.45294	5.34483	10.728	5.35461	1
ENCSR330ADN	DDX20		20.7139	3.17719e-05	-0.780466	3.00183	-3.29898	0.689655	1.48467	0.390071	1
ENCSR337NQP	ESRRA		0.876876	0.645043	-0.376923	-0.455184	0.724854	0.172414	0.215517	0.319149	1
ENCSR348JOJ	MTA1		453.108	4.06366e-99	-1.56153	11.9217	-13.7993	22.7586	35.4885	12.8014	1
ENCSR360JOC	CHD1		195.214	4.07177e-43	0.525462	8.16543	-10.1748	13.4483	17.1695	5.85106	1
ENCSR382WLL	ELK1		137.987	1.08767e-30	-3.02765	7.63081	-7.91287	2.75862	8.62069	2.19858	1
ENCSR389BLX	GATAD2B		26.2415	2.00327e-06	-1.49535	3.3989	-3.45797	1.03448	2.61015	0.992908	1
ENCSR391JII	RCOR1		126.401	3.56783e-28	0.673416	6.07175	-7.69412	25	28.2088	16.5957	1
ENCSR391KQC	MTA3		56.1472	6.42364e-13	2.18671	3.93343	-5.7783	6.37931	5.74713	2.16312	1
ENCSR402JAC	ZNF574		34.8557	2.69891e-08	-1.88173	3.93079	-3.93001	0.344828	1.86782	0.390071	1
ENCSR417DKD	NFXL1		807.387	4.76693e-176	26.7825	-3.89284	-7.40901	20	1.53257	0.283688	1
ENCSR419ODQ	ZNF507		12.7421	0.00171033	-1.63445	2.32732	-2.09087	1.2069	2.75383	1.63121	1
ENCSR427BBI	MLLT1		36.7712	1.03573e-08	0.921145	3.53225	-4.71616	3.96552	4.26245	1.66667	1
ENCSR431TLD	SMARCE1		360.897	4.28846e-79	-2.08223	9.24626	-10.3075	39.8276	55.34	32.5532	2
ENCSR435OQD	ZFX		242.889	1.80881e-53	-3.98651	10.0211	-10.3867	3.10345	11.9971	2.2695	1
ENCSR442VBJ	RAD51		269.327	3.28316e-59	8.15039	6.00871	-11.0083	30.8621	20.7615	8.40426	2
ENCSR449UFF	ZKSCAN1		176.516	4.67785e-39	11.3554	0.488987	-5.74485	21.5517	8.33333	5.03546	1
ENCSR465VLK	FOXK2		6.38804	0.0410067	0.378899	1.49858	-1.99546	0.344828	0.383142	0.070922	1
ENCSR465XQW	ZNF217		314.242	5.79844e-69	-1.9875	7.80663	-8.59855	49.6552	64.8467	43.7234	3
ENCSR468LUO	SIN3A		274.784	2.1447e-60	-3.00954	8.95855	-9.53681	27.069	42.5287	23.8652	1
ENCSR487ASM	SMARCA5		94.1558	3.58371e-21	-2.79608	6.06406	-6.11131	8.7931	16.3554	8.82979	1
ENCSR502NRF	ELF1		364.309	7.78506e-80	0.201686	10.3337	-12.6666	27.069	34.8898	14.3262	1
ENCSR503VTG	ZNF24		185.276	5.85882e-41	-1.01528	7.53225	-8.70556	25.6897	34.0757	19.2553	1
ENCSR546KCN	FOSL2		358.164	1.68169e-78	-2.8293	11.2738	-12.4359	13.9655	26.7241	8.86525	1
ENCSR551ZDZ	MTA2		17.1023	0.000193319	3.96502	-0.864214	-0.746524	1.55172	0.359195	0.35461	1
ENCSR555DCF	ZNF512B		2.10707	0.348702	-1.17496	-0.213535	0.792709	1.72414	2.44253	2.7305	1
ENCSR555PBN	MAFK		23.4531	8.0766e-06	-0.501355	3.1052	-3.55136	3.62069	5.00479	2.69504	1
ENCSR557JTZ	GTF2F1		309.739	5.50977e-68	-0.990095	10.4653	-12.2862	13.9655	21.9828	6.4539	1
ENCSR560BUE	CTCF		53.7243	2.15738e-12	-3.38428	4.35486	-3.76462	11.2069	19.7797	14.078	1
ENCSR569XNP	FOS		345.004	1.2117e-75	1.92541	8.34254	-11.0253	48.7931	52.0354	29.8227	2
ENCSR573OJP	NCOA3		672.701	8.40948e-147	16.5732	4.24138	-12.6775	71.8966	36.3506	18.9716	3
ENCSR582ZOA	NFIB		14.0708	0.000880166	-0.550854	2.33596	-2.59281	10.5172	12.5	9.64539	1
ENCSR591EBL	NBN		3.38651	0.18392	-0.0693587	1.18181	-1.40669	0.172414	0.26341	0.070922	1
ENCSR604WXQ	MSX2		272.048	8.42511e-60	2.09502	8.02808	-10.7195	37.4138	39.5354	20.9574	2
ENCSR620DUQ	CREB1		497.158	1.10515e-108	3.06074	9.65847	-13.1415	53.1034	54.5977	28.0851	2
ENCSR636EYA	CTBP1		240.696	5.41456e-53	1.39774	5.73194	-7.6091	66.0345	68.4387	50.2482	3
ENCSR663ZZZ	MNT		483.308	1.12433e-105	-5.28231	11.1178	-11.1336	28.6207	54.2864	29.2553	1
ENCSR686SOV	NCOA3		660.585	3.59646e-144	23.0428	-1.155	-9.04468	32.4138	6.5613	2.51773	2
ENCSR697CUP	HCFC1		267.833	6.9327e-59	-3.07898	10.0493	-10.8326	10	20.9531	7.05674	1
ENCSR699YFX	CLOCK		213.363	4.66446e-47	-1.43358	8.44861	-9.63098	19.3103	28.2567	13.5816	1
ENCSR701AQS	ZNF592		183.323	1.55582e-40	0.6314	7.73398	-9.69784	16.8966	20.6178	8.58156	1
ENCSR702BYX	NFIB		142.266	1.2803e-31	-0.292868	6.03356	-7.20944	37.069	43.5584	29.4681	2
ENCSR703TNG	RAD21		115.199	9.65744e-26	-2.87951	5.1553	-4.96761	40	53.8554	41.8085	2
ENCSR729LGA	SP1		5.34982	0.068913	0.344057	1.36992	-1.8231	0.689655	0.742337	0.319149	1
ENCSR757EMK	SUZ12		85.109	3.30233e-19	-4.38644	5.87813	-5.1638	1.2069	7.591	3.19149	1
ENCSR761LRR	ZNF512B		18.4218	9.99429e-05	-0.308771	2.68272	-3.12457	7.06897	8.54885	5.8156	1
ENCSR785UCD	ZNF8		0.100192	0.951138	0.0622076	-0.210215	0.227599	0.344828	0.311303	0.35461	1
ENCSR788XNX	RFX1		56.6599	4.97115e-13	-1.64825	4.80508	-5.09981	6.55172	10.728	5.74468	1
ENCSR801SWX	TARDBP		239.458	1.00524e-52	-0.0218785	8.56917	-10.4179	23.9655	30.5077	14.3972	1
ENCSR829WBA	OVOL1		127.989	1.61265e-28	0.685292	5.96187	-7.5658	28.6207	31.9444	19.7163	2
ENCSR841YWU	E4F1		24.3398	5.18429e-06	-1.94104	3.27291	-3.10252	0.172414	1.46073	0.390071	1
ENCSR864KNH	YBX1		1.68675	0.430257	-0.27669	-0.742438	1.02896	0	0	0.035461	1
ENCSR866QPZ	ATF7		319.552	4.0762e-70	2.41215	9.42845	-12.5674	25.5172	27.6102	10.1064	1
ENCSR875PEI	TRIM22		16.6452	0.000242959	-2.02603	2.5983	-2.24305	2.75862	5.41188	3.65248	1
ENCSR876UYH	ZHX2		287.204	4.30944e-63	-4.56089	9.95845	-10.05	13.9655	30.4598	13.9716	1
ENCSR897JAS	CREB1		480.091	5.61828e-105	2.55543	9.91237	-13.2213	48.6207	51.6762	25.6738	2
ENCSR897ZXU	E2F8		5.38338	0.0677664	1.81212	0.448764	-1.36792	1.03448	0.550766	0.319149	1
ENCSR899BKM	ZNF687		336.08	1.04976e-73	-2.64378	9.77059	-10.6909	28.9655	44.5163	23.5106	1
ENCSR912ATU	ZNF217		26.7919	1.52129e-06	1.414	2.74009	-3.9757	6.89655	6.51341	3.75887	1
ENCSR912NMR	NONO		16.2671	0.00029352	1.61622	1.93774	-3.09102	3.10345	2.56226	1.2766	1
ENCSR924TVL	RFX5		106.523	7.39256e-24	-2.44371	6.57905	-6.89781	6.03448	12.1648	5.1773	1
ENCSR934JDG	CLOCK		258.69	6.70319e-57	-1.39742	9.66928	-11.1328	12.931	21.0249	7.02128	1
ENCSR940MHE	MBD2		441.836	1.13896e-96	0.597058	9.40953	-11.7213	50.5172	58.9559	33.3688	2
ENCSR949IWY	PAX8		0.21799	0.896735	-0.147762	-0.246418	0.366879	0.344828	0.359195	0.425532	1
ENCSR954WVZ	ESRRA		359.859	7.20398e-79	10.0461	5.37699	-11.0993	52.4138	34.2193	18.2979	2
ENCSR966YYJ	BMI1		90.774	1.94387e-20	2.51361	4.86463	-7.05973	15.6897	14.6791	7.44681	1
ENCSR979FQP	GATAD2B		172.039	4.38775e-38	0.121236	6.98749	-8.55807	29.3103	34.8659	20.3546	1
ENCSR986XYK	PKNOX1		181.635	3.61767e-40	-1.41749	7.09932	-7.99633	32.4138	42.5287	26.9149	1
ERP000209	RAD21	E2	183.097	1.74193e-40	-1.23188	7.64362	-8.74286	22.931	31.4895	17.1986	1
ERP000209	RAD21		181.891	3.18271e-40	-5.97753	7.48537	-6.39808	14.1379	33.0699	20.7801	1
ERP000209	STAG1	E2	230.349	9.55919e-51	1.04291	7.44456	-9.53227	38.6207	42.9358	25.2482	1
ERP000209	STAG1		213.641	4.06023e-47	-6.38468	7.90515	-6.72426	15.8621	37.2605	23.5106	1
ERP000380	CTCF	E2	72.8016	1.5536e-16	-1.27536	5.34398	-5.92471	8.62069	12.9789	6.73759	1
ERP000380	CTCF		40.9857	1.25913e-09	-0.736835	4.01791	-4.55524	7.75862	10.4885	6.13475	1
ERP000380	CTCF		42.8912	4.85619e-10	-1.5459	4.19853	-4.40812	6.2069	9.8659	5.67376	1
ERP000380	FOXA1	E2	40.4095	1.67955e-09	-0.891254	-1.92596	2.7479	67.069	67.6724	74.5035	3
ERP000380	FOXA1		202.376	1.13374e-44	-9.25349	2.26038	1.44591	25.8621	56.705	56.1348	2
ERP000783	CTCF	TAM	32.678	8.018e-08	0.000452572	3.47256	-4.22597	8.44828	10.0096	6.13475	1
ERP000901	CREBBP		231.169	6.34284e-51	-4.83784	5.53085	-4.53648	51.2069	74.7845	60.7092	2
ERP000901	NCOA1	E2	326.258	1.42582e-71	12.6661	2.55174	-8.84944	51.0345	26.796	16.5248	2
ERP000901	NCOA1		307.201	1.95933e-67	12.6088	2.46205	-8.71434	45.8621	23.3238	13.9362	2
ERP000901	NCOA2	E2	206.968	1.1413e-45	4.35443	2.32711	-4.80665	92.931	80.2203	69.1135	4
ERP000901	NCOA2		104.837	1.71724e-23	0.561292	5.43376	-6.86691	27.7586	30.8908	19.8936	1
ERP000901	NCOA3	E2	364.462	7.21183e-80	6.85995	4.29885	-8.34235	85.5172	68.1992	50.461	4
ERP001226	FOXA1		60.0459	9.14542e-14	-0.993397	-2.13416	3.04758	71.7241	72.4377	80.2837	3
ERP005838	NRIP1	E2	95.3562	1.96636e-21	2.19016	1.15615	-2.40018	96.0345	89.2002	83.2979	4
ERP005838	NRIP1		171.39	6.06881e-38	2.56689	2.95526	-4.76038	87.2414	81.8726	69.9291	4
GSE101559	MED12	E2 (siCTRL)	773.114	1.31934e-168	24.4886	-1.43594	-9.35848	44.3103	10.1054	5.03546	2
GSE101737	TP53		550.07	3.57986e-120	22.2535	-3.42037	-5.93	12.5862	0.814176	0.106383	1
GSE102410	JUN	E2	259.156	5.30752e-57	-2.31462	7.8813	-8.54106	39.3103	54.0709	34.9291	2
GSE102410	JUN	Vehicle	318.902	5.64035e-70	-5.29261	10.8353	-10.7853	8.62069	25.0239	9.32624	1
GSE102616	ZFX		310.513	3.74011e-68	-4.44935	10.7694	-11.0874	9.13793	23.4914	8.15603	1
GSE104399	AR		212.777	6.25346e-47	12.5213	0.434674	-6.20751	22.931	8.30939	4.78723	1
GSE104399	NR3C1		41.3701	1.03894e-09	4.5004	0.720452	-2.91771	39.3103	29.8132	26.2411	2
GSE107013	CTBP2		113.41	2.36231e-25	4.61702	2.78944	-5.48836	61.0345	50.7663	40.6383	3
GSE107013	TRPS1		123.274	1.70332e-27	7.8946	1.99045	-6.00249	30.5172	18.2711	12.3404	1
GSE107013	YAP1		111.782	5.33038e-25	2.11489	5.69321	-7.8872	14.3103	14.3199	6.34752	1
GSE109571	BRD3	E2	71.8611	2.48639e-16	7.64831	0.0438723	-3.52199	5	1.341	0.567376	1
GSE109571	BRD3	Vehicle	2.4435	0.294715	-0.479242	1.04698	-1.05673	0	0.0718391	0	1
GSE109820	GRHL2	E2	176.412	4.92673e-39	-3.53775	5.94906	-5.63501	43.9655	61.6619	46.9858	2
GSE109820	GRHL2		327.81	6.55993e-72	-9.6427	7.6713	-4.96214	18.9655	54.2385	39.8227	1
GSE115602	SMC1A		100.213	1.73365e-22	5.32267	3.05089	-6.12653	36.0345	27.3467	19.2199	2
GSE117145	SIX2		4.07357	0.130447	-0.618698	1.35165	-1.36424	0	0.119732	0	1
GSE117492	GATA3		33.08	6.55791e-08	4.69551	-2.03376	0.345408	29.3103	19.0613	20.7801	1
GSE122847	GATA3		6.16769	0.0457829	-0.24037	-0.701767	0.962992	75.1724	75.0958	77.6241	3
GSE123284	ARID1A	E2	166.055	8.74033e-37	0.295225	5.78526	-7.17398	49.6552	55.0527	39.3617	2
GSE123284	ARID1A		62.6825	2.44723e-14	-1.99102	3.08693	-2.85354	58.7931	69.3487	61.1348	3
GSE123284	ARID2		83.7692	6.45294e-19	-0.15819	4.25728	-5.10895	46.7241	51.7002	40.5674	2
GSE123284	BRD4		165.979	9.07867e-37	-1.54673	7.07994	-7.91414	27.069	36.6858	22.3759	1
GSE123284	HDAC1		322.93	7.52556e-71	-6.36237	8.74362	-7.75471	27.4138	54.2625	35.3546	1
GSE123284	SMARCA4		146.47	1.56491e-32	-3.42667	4.18163	-3.5346	59.4828	76.9875	65.8865	3
GSE123284	SMARCB1	E2	143.465	7.02872e-32	-2.55838	3.96943	-3.67015	65.8621	80.3879	69.078	3
GSE123284	SMARCB1		142.995	8.89173e-32	-1.95292	4.57664	-4.68365	60.6897	73.1561	60.1064	3
GSE124225	SMARCC1		191.241	2.96786e-42	0.00597036	6.50081	-7.91356	45.1724	51.9157	35.1418	2
GSE124225	SMARCD3		164.764	1.66677e-36	-0.565252	5.80873	-6.81231	49.4828	57.591	41.9858	2
GSE124448	CARM1	E2	536.976	2.49485e-117	16.4274	4.30965	-12.6945	43.7931	18.9655	6.63121	2
GSE124448	MED12	Vehicle	11.6848	0.0029019	2.18539	1.12777	-2.36349	1.03448	0.550766	0.141844	1
GSE124448	MED12	E2	570.974	1.03396e-124	20.7786	-0.559338	-8.74268	39.4828	10.6561	5.49645	2
GSE124667	CTCF		1.19872	0.549163	-1.03746	0.299786	0.105689	1.2069	1.84387	1.80851	1
GSE124667	FOXA1		21.515	2.12853e-05	1.12552	1.8763	-2.79371	44.4828	43.3429	38.0851	2
GSE125594	TEAD4	Vehicle	124.369	9.85318e-28	6.47409	3.45418	-7.13948	26.3793	17.84	10.3901	1
GSE125594	TEAD4	E2	134.806	5.33754e-30	6.55048	2.80991	-6.39011	47.4138	34.4828	25.2128	2
GSE125594	TEAD4	Vehicle	71.5466	2.90968e-16	-4.56816	4.56326	-3.48133	15.3448	28.3046	21.5248	1
GSE125594	YY1AP1	Vehicle	487.272	1.54978e-106	17.0589	0.993476	-8.9454	58.1034	24.4013	15.461	2
GSE125594	YY1AP1	E2	266.341	1.46134e-58	8.40115	2.38667	-6.71437	80.1724	57.16	45.1064	4
GSE125594	YY1AP1	Vehicle	71.2963	3.29765e-16	0.419099	4.02863	-5.09252	41.7241	44.5881	34.5035	2
GSE126004	FOXA1		30.9227	1.92846e-07	-2.79829	-0.160375	1.46422	58.1034	67.4569	69.9291	3
GSE126004	FOXA1		31.8995	1.18332e-07	-2.9764	-0.180775	1.56982	54.4828	64.1762	66.773	3
GSE126004	FOXA1		28.7812	5.62656e-07	-3.5165	0.713094	0.727014	42.7586	54.2385	54.4326	2
GSE126004	FOXA1		30.332	2.59108e-07	-3.55904	0.871564	0.553461	43.7931	55.7232	55.4965	2
GSE126004	STAT3		234.521	1.1866e-51	-2.00734	8.85564	-9.86609	19.3103	29.9569	14.3617	1
GSE126004	STAT3		285.44	1.04108e-62	-3.33565	8.27073	-8.55191	37.069	55.2443	35.5319	1
GSE126004	STAT3		227.488	3.99566e-50	-2.70773	8.73734	-9.4045	18.7931	31.0105	15.6028	1
GSE126004	STAT3		241.286	4.03083e-53	0.167396	8.16464	-10.0115	31.2069	37.8352	20.3546	1
GSE128445	ARID1B		284.567	1.61115e-62	5.96484	7.72374	-12.1042	24.6552	19.6839	6.20567	1
GSE128445	EP300		538.115	1.41223e-117	13.4124	2.71268	-9.38379	87.7586	51.772	36.4894	4
GSE128445	GATA3		64.4582	1.00709e-14	1.88989	3.50519	-5.12256	39.3103	37.8831	29.0071	2
GSE128445	JUN		399.773	1.55011e-87	2.15446	10.9977	-14.3602	20.6897	24.0182	5.85106	1
GSE128445	SMARCA4		254.602	5.17576e-56	-1.03908	9.88734	-11.5607	7.41379	13.1944	2.2695	1
GSE132432	NR2F2	E2	16.1395	0.00031286	-0.260838	2.57414	-3.01418	2.06897	2.82567	1.38298	1
GSE132432	NR2F2	Vehicle	16.7327	0.000232561	1.04957	2.25449	-3.21949	1.55172	1.46073	0.460993	1
GSE133072	GATA3		3.46346	0.176978	0.645848	-0.83345	0.721326	54.8276	51.9397	53.8652	3
GSE133072	TRPS1		125.677	5.12392e-28	-4.43958	4.7245	-3.73584	41.7241	60.8956	50.2128	2
GSE137216	CTCF		16.1874	0.000305457	-2.09382	2.46874	-2.05464	6.55172	10.3448	8.01418	1
GSE137216	RAD21		68.6957	1.21038e-15	-4.94015	4.62437	-3.38699	8.27586	19.5642	14.0426	1
GSE137558	HSF1	E2	54.7737	1.27656e-12	2.74416	3.60518	-5.63166	7.06897	5.81897	2.34043	1
GSE140185	FOXA1		35.3284	2.13075e-08	-4.32712	1.7392	-0.154038	27.2414	40.0383	38.1915	1
GSE140185	GRHL1		96.5539	1.08042e-21	-6.42817	4.97984	-3.14472	8.96552	24.8324	18.5461	1
GSE140185	SMARCA4		80.1095	4.0221e-18	-0.785148	3.51121	-3.91672	62.069	69.0613	58.7589	3
GSE144036	AFF4		211.825	1.00636e-46	-1.20452	9.04209	-10.4571	7.58621	13.3142	3.15603	1
GSE152203	NR3C1		56.1328	6.47011e-13	0.837519	2.99817	-4.02831	56.3793	57.2318	48.2624	3
GSE152203	STAT3		384.695	2.91448e-84	-2.9728	9.48694	-10.1965	38.7931	57.3755	34.078	2
GSE154941	MYC		174.556	1.24611e-38	-2.09219	8.22212	-9.05668	8.7931	16.1398	5.92199	1
GSE157216	FOSL2	Vehicle	137.189	1.62074e-30	-2.86926	7.69679	-8.065	1.2069	5.60345	0.602837	1
GSE157218	JUNB	Vehicle	302.249	2.33e-66	-2.97655	10.8629	-11.8692	7.24138	17.0977	3.86525	1
GSE157385	JUN	Vehicle	400.878	8.92366e-88	-5.2894	10.2613	-10.0882	27.2414	51.5805	29.1489	1
GSE23730	ERG		394.322	2.36674e-86	-2.58914	12.2507	-13.7337	8.62069	19.0852	3.29787	1
GSE23852	FOXA1	E2	115.299	9.18434e-26	-6.71408	1.24067	1.53515	36.3793	58.9799	59.7163	2
GSE23852	FOXA1	Vehicle	5.78638	0.0553991	0.882962	0.389117	-0.873951	73.7931	71.2165	69.3262	3
GSE23852	TFAP2C	E2	258.613	6.96366e-57	-4.51027	7.12742	-6.62791	41.5517	63.7213	46.2057	2
GSE23852	TFAP2C	Vehicle	226.62	6.16616e-50	-1.30367	5.97507	-6.67984	59.4828	71.1925	53.7589	2
GSE29073	EP300	Vehicle	94.8249	2.56464e-21	5.61319	3.52882	-6.83989	9.13793	5.43582	1.63121	1
GSE29073	EP300	E2	323.055	7.06962e-71	12.3967	4.15403	-10.6771	29.4828	14.0086	4.89362	2
GSE29073	GATA3	Vehicle	5.7489	0.0564471	-1.47242	1.29392	-0.906808	16.2069	19.7318	18.1206	1
GSE29073	GATA3	E2	170.34	1.02619e-37	7.72869	1.76701	-5.65534	65.6897	46.1446	37.234	3
GSE38901	HSF1		23.9447	6.31645e-06	0.509806	2.93683	-3.80504	2.75862	3.13697	1.31206	1
GSE40129	GATA3	E2	37.6538	6.66153e-09	4.3876	-1.60991	-0.0307337	53.7931	40.3736	41.9504	3
GSE40129	GATA3		19.9416	4.6746e-05	-3.85615	1.87044	-0.527328	2.41379	7.2318	6.24113	1
GSE40762	FOXM1		172.326	3.80047e-38	8.14781	3.31674	-7.73129	35.6897	22.7251	13.8298	2
GSE41561	KLF4		304.207	8.7536e-67	1.65702	9.82426	-12.7066	16.8966	20.0431	5.24823	1
GSE41561	TLE3		33.0346	6.70857e-08	1.50847	2.56111	-3.80073	32.931	31.681	25.6383	1
GSE44737	MBD3		161.251	9.65772e-36	-1.75995	7.49137	-8.3181	17.069	25.5987	13.2979	1
GSE45852	HSF1		15.6705	0.000395547	-0.53005	2.58548	-2.90589	1.37931	2.17912	0.957447	1
GSE46055	KDM5B		276.884	7.50744e-61	-1.08063	10.1831	-11.9017	9.48276	16.1877	3.5461	1
GSE47027	NR5A2		14.3864	0.000751675	1.52755	1.60284	-2.64326	20	18.3908	15.2837	1
GSE48930	AR		157.047	7.90015e-35	-0.963792	7.3394	-8.49424	17.4138	24.1379	12.1631	1
GSE51274	GATA3		9.60967	0.00819007	-0.384292	1.38146	-1.50682	53.7931	56.5613	52.8723	2
GSE54693	MBD2		12.0637	0.00240109	3.33746	-0.742438	-0.610105	0.172414	0	0	1
GSE55921	BRD4	E2	227.992	3.10505e-50	5.05422	7.41463	-11.315	14.6552	11.8774	2.30496	1
GSE55921	BRD4		216.542	9.51786e-48	-3.37922	9.44629	-9.96269	3.7931	11.7337	2.48227	1
GSE59530	FOXA1	E2	19.5341	5.73078e-05	2.72351	-1.39866	0.466893	58.9655	49.3534	51.5248	3
GSE59530	FOXA1		160.186	1.64487e-35	-9.52845	1.49341	2.50394	13.6207	39.4397	40.922	1
GSE59530	RELA	E2	69.3071	8.91548e-16	-3.69151	5.43987	-4.94564	0	3.63985	0.921986	1
GSE59530	RELA		69.9855	6.35099e-16	-3.56491	5.48822	-5.0619	0	3.44828	0.780142	1
GSE60270	FOXA1	E2	4.29485	0.116784	-1.22017	-0.0888479	0.661483	51.2069	54.8611	55.8865	3
GSE60270	FOXA1		77.7181	1.3296e-17	-6.86383	2.73975	-0.221176	14.1379	31.9684	29.4326	1
GSE60270	GATA3	E2	1.89595	0.387525	1.21227	-0.317682	-0.16319	17.7586	15.5651	15.6383	1
GSE60270	GATA3		6.27967	0.0432899	-2.37114	0.719817	0.199395	0.344828	1.72414	1.63121	1
GSE60270	MED1	E2	405.208	1.0236e-88	14.7335	2.33078	-9.51818	51.8966	24.4492	14.1844	2
GSE60270	MED1	E2 (shCTRL)	402.47	4.02482e-88	9.06839	7.10212	-12.7552	46.0345	32.2797	14.2199	2
GSE60270	MED1	Vehicle (shCTRL)	354.275	1.17541e-77	-6.47905	10.8275	-10.2377	11.8966	33.932	15.7447	1
GSE60270	PRKDC	E2	95.6153	1.7274e-21	3.48765	4.51921	-7.08113	18.7931	16.0441	8.58156	1
GSE60270	TFAP2A	E2	145.386	2.691e-32	2.20757	4.61688	-6.61946	58.4483	56.9923	42.8723	2
GSE60270	TFAP2A		127.675	1.88686e-28	-4.84548	6.61621	-5.85379	11.3793	25.1197	15.4965	1
GSE67295	RELA	E2	428.697	8.12237e-94	18.2535	-0.202386	-8.03192	27.5862	7.13602	3.15603	1
GSE67295	RELA	Vehicle	465.756	7.28282e-102	11.3948	1.59695	-7.11102	97.5862	62.6437	50.2837	4
GSE70764	CTCF		11.7063	0.0028709	-0.130764	2.12561	-2.52736	6.55172	7.5431	5.46099	1
GSE72082	GABPA		14.6546	0.000657351	-1.41085	2.55393	-2.46804	0	0.574713	0.070922	1
GSE72082	RAD21		131.694	2.52876e-29	-2.68035	5.75663	-5.78968	36.5517	49.8324	36.7021	1
GSE72249	FOXA1	E2	29.2383	4.47704e-07	-2.51665	1.23249	-0.358491	63.7931	74.3295	72.1277	3
GSE72249	FOXA1		206.79	1.24783e-45	-6.9908	3.47815	-1.06215	45.6897	74.4732	68.2979	2
GSE72249	NR3C1		8.27853	0.0159346	0.738995	1.59	-2.27001	0.862069	0.814176	0.283688	1
GSE75070	RUNX1		21.3628	2.29679e-05	1.22459	2.53457	-3.6397	1.37931	1.26916	0.248227	1
GSE76454	ZNF143	E2	374.043	5.99154e-82	-2.74948	9.48033	-10.2897	37.931	55.5556	32.5532	1
GSE76454	ZNF143		368.684	8.73341e-81	-6.1949	9.49664	-8.74702	27.2414	54.1667	33.4043	1
GSE76893	MED1		283.169	3.24113e-62	9.79629	4.63899	-10.0879	41.8966	25.9818	13.5461	2
GSE76893	NIPBL		344.474	1.57909e-75	11.8021	3.30606	-9.37557	58.1034	33.7165	21.0638	3
GSE76893	SMC1A		67.8342	1.86205e-15	1.63005	4.00385	-5.61154	29.4828	29.1906	20.6383	2
GSE80808	FOXA1		34.3969	3.39471e-08	-3.98997	1.19284	0.357938	37.5862	50.5029	49.6809	2
GSE81510	GATA3	E2	89.0932	4.50469e-20	7.71538	-1.93936	-1.139	44.3103	25.9339	26.383	2
GSE81714	FOXA1		7.28506	0.026186	-1.50966	0.23467	0.399081	60.6897	66.068	66.383	3
GSE85317	MEN1	E2	104.87	1.68915e-23	-0.988094	6.38162	-7.31769	7.93103	12.1648	5	1
GSE85317	MEN1		180.134	7.66134e-40	-5.13387	8.26626	-7.73095	6.2069	19.0852	8.75887	1
GSE85352	ARNT		315.358	3.31806e-69	-4.47425	9.19511	-9.16042	28.4483	49.2577	29.2908	1
GSE90550	AHR	Vehicle	115.865	6.92205e-26	4.37181	4.18426	-7.0745	34.3103	28.4483	18.5106	2
GSE90550	AHRR	Vehicle	36.0373	1.49486e-08	-0.801803	3.89846	-4.38041	2.24138	3.80747	1.41844	1
GSE95302	FOXA1		30.048	2.9865e-07	-3.46997	2.66029	-1.66364	19.6552	29.3103	25.5319	1
GSE96996	UTX		109.454	1.70721e-24	7.87902	2.20075	-6.25133	8.96552	3.75958	1.06383	1
GSE97661	DPF1		35.3832	2.07315e-08	-1.35792	3.89458	-4.12348	2.75862	5.05268	2.34043	1
GSE97661	KLF10		149.301	3.79851e-33	-3.75287	7.97567	-8.00364	1.55172	7.83046	1.66667	1
GSE97661	ZMYM3		50.9503	8.63542e-12	0.624861	4.25251	-5.45827	5.86207	6.77682	2.9078	1
GSE97661	ZSCAN2		236.673	4.04752e-52	13.0815	0.877281	-7.00017	20.6897	7.01628	3.26241	1
GSE97661	ZXDC		215.993	1.25205e-47	-0.300144	6.62586	-7.9269	49.6552	57.8305	39.9291	2
GSE98728	RB1	siGFP	150.042	2.62237e-33	-3.50525	7.8265	-7.93441	4.65517	12.6676	4.53901	1
GSE99680	GRHL2		142.115	1.38055e-31	-8.16419	5.77165	-3.32097	6.03448	26.0776	18.9716	1
